# Supplementary material for: A 12-Connected [Y4((μ3-OH)4]8+ Cluster-Based Luminescent Metal-Organic Framework for Selective Turn-on Detection of F− in H2O
Source: MDPI journal article supplement (doi:10.3390/molecules28041893), 2023-02-16

# checkCIF/PLATON report

Structure factors have been supplied for datablock(s) 190610c\_sq

THIS REPORT IS FOR GUIDANCE ONLY. IF USED AS PART OF A REVIEW PROCEDURE FOR PUBLICATION, IT SHOULD NOT REPLACE THE EXPERTISE OF AN EXPERIENCED CRYSTALLOGRAPHIC REFEREE.

No syntax errors found.      CIF dictionary      Interpreting this report

## Datablock: 190610c\_sq

---

Bond precision:    C-C = 0.0253 Å                      Wavelength=0.71073

Cell:                      a=33.7993(10)              b=33.7993(10)              c=7.9398(5)  
                                alpha=90                      beta=90                      gamma=90

Temperature:              298 K

|                        | Calculated                        | Reported           |
|------------------------|-----------------------------------|--------------------|
| Volume                 | 9070.4(8)                         | 9070.4(8)          |
| Space group            | P -4 21 m                         | P -4 21 m          |
| Hall group             | P -4 2ab                          | P -4 2ab           |
| Moiety formula         | C112 H70 N8 O59 Y8 [+<br>solvent] | C112 H70 N8 O59 Y8 |
| Sum formula            | C112 H70 N8 O59 Y8 [+<br>solvent] | C112 H70 N8 O59 Y8 |
| Mr                     | 3183.04                           | 3183.04            |
| Dx, g cm <sup>-3</sup> | 1.166                             | 1.165              |
| Z                      | 2                                 | 2                  |
| Mu (mm <sup>-1</sup> ) | 2.598                             | 2.598              |
| F000                   | 3164.0                            | 3164.0             |
| F000'                  | 3121.15                           |                    |
| h,k,lmax               | 40,40,9                           | 40,40,9            |
| Nref                   | 8308[ 4625]                       | 8216               |
| Tmin,Tmax              | 0.541,0.677                       | 0.262,1.000        |
| Tmin'                  | 0.517                             |                    |

Correction method= # Reported T Limits: Tmin=0.262 Tmax=1.000  
AbsCorr = MULTI-SCAN

Data completeness= 1.78/0.99                      Theta(max)= 25.100

R(reflections)= 0.1209( 6343)                      wR2(reflections)= 0.3291( 8216)

S = 1.053                                      Npar= 178

---

The following ALERTS were generated. Each ALERT has the format

**test-name\_ALERT\_alert-type\_alert-level.**

Click on the hyperlinks for more details of the test.

---

### Alert level B

DIFMN02\_ALERT\_2\_B The minimum difference density is < -0.1\*ZMAX\*1.00

\_refine\_diff\_density\_min given = -4.683

Test value = -3.900

|                   |                       |                             |         |       |
|-------------------|-----------------------|-----------------------------|---------|-------|
| PLAT098_ALERT_2_B | Large Reported Min.   | (Negative) Residual Density | -4.68   | eA-3  |
| PLAT341_ALERT_3_B | Low Bond Precision on | C-C Bonds .....             | 0.02533 | Ang.  |
| PLAT420_ALERT_2_B | D-H Without Acceptor  | O15 --H15 .                 | Please  | Check |
| PLAT420_ALERT_2_B | D-H Without Acceptor  | O16 --H16B .                | Please  | Check |

---

### Alert level C

DIFMN03\_ALERT\_1\_C The minimum difference density is < -0.1\*ZMAX\*0.75

The relevant atom site should be identified.

DIFMX02\_ALERT\_1\_C The maximum difference density is > 0.1\*ZMAX\*0.75

The relevant atom site should be identified.

STRVA01\_ALERT\_4\_C Flack test results are ambiguous.

From the CIF: \_refine\_ls\_abs\_structure\_Flack 0.490

From the CIF: \_refine\_ls\_abs\_structure\_Flack\_su 0.030

|                   |                                                  |      |        |
|-------------------|--------------------------------------------------|------|--------|
| PLAT082_ALERT_2_C | High R1 Value .....                              | 0.12 | Report |
| PLAT084_ALERT_3_C | High wR2 Value (i.e. > 0.25) .....               | 0.33 | Report |
| PLAT097_ALERT_2_C | Large Reported Max. (Positive) Residual Density  | 3.59 | eA-3   |
| PLAT241_ALERT_2_C | High 'MainMol' Ueq as Compared to Neighbors of   | 01   | Check  |
| PLAT241_ALERT_2_C | High 'MainMol' Ueq as Compared to Neighbors of   | 05   | Check  |
| PLAT241_ALERT_2_C | High 'MainMol' Ueq as Compared to Neighbors of   | 06   | Check  |
| PLAT241_ALERT_2_C | High 'MainMol' Ueq as Compared to Neighbors of   | 07   | Check  |
| PLAT241_ALERT_2_C | High 'MainMol' Ueq as Compared to Neighbors of   | 015  | Check  |
| PLAT242_ALERT_2_C | Low 'MainMol' Ueq as Compared to Neighbors of    | Y1   | Check  |
| PLAT242_ALERT_2_C | Low 'MainMol' Ueq as Compared to Neighbors of    | Y2   | Check  |
| PLAT242_ALERT_2_C | Low 'MainMol' Ueq as Compared to Neighbors of    | Y3   | Check  |
| PLAT250_ALERT_2_C | Large U3/U1 Ratio for Average U(i,j) Tensor .... | 2.6  | Note   |
| PLAT369_ALERT_2_C | Long C(sp2)-C(sp2) Bond C25 - C28 .              | 1.55 | Ang.   |
| PLAT910_ALERT_3_C | Missing # of FCF Reflection(s) Below Theta(Min). | 6    | Note   |

---

### Alert level G

|                   |                                                  |       |        |
|-------------------|--------------------------------------------------|-------|--------|
| PLAT002_ALERT_2_G | Number of Distance or Angle Restraints on AtSite | 40    | Note   |
| PLAT003_ALERT_2_G | Number of Uiso or Uij Restrained non-H Atoms ... | 50    | Report |
| PLAT007_ALERT_5_G | Number of Unrefined Donor-H Atoms .....          | 7     | Report |
| PLAT072_ALERT_2_G | SHELXL First Parameter in WGHT Unusually Large   | 0.19  | Report |
| PLAT083_ALERT_2_G | SHELXL Second Parameter in WGHT Unusually Large  | 83.22 | Why ?  |
| PLAT171_ALERT_4_G | The CIF-Embedded .res File Contains EADP Records | 3     | Report |
| PLAT172_ALERT_4_G | The CIF-Embedded .res File Contains DFIX Records | 42    | Report |
| PLAT174_ALERT_4_G | The CIF-Embedded .res File Contains FLAT Records | 4     | Report |
| PLAT177_ALERT_4_G | The CIF-Embedded .res File Contains DELU Records | 1     | Report |
| PLAT300_ALERT_4_G | Atom Site Occupancy of O16 Constrained at        | 0.5   | Check  |
| PLAT300_ALERT_4_G | Atom Site Occupancy of H16A Constrained at       | 0.5   | Check  |
| PLAT300_ALERT_4_G | Atom Site Occupancy of H16B Constrained at       | 0.5   | Check  |
| PLAT300_ALERT_4_G | Atom Site Occupancy of H17A Constrained at       | 0.5   | Check  |
| PLAT300_ALERT_4_G | Atom Site Occupancy of H17B Constrained at       | 0.5   | Check  |
| PLAT301_ALERT_3_G | Main Residue Disorder .....(Resd 1 )             | 1%    | Note   |
| PLAT606_ALERT_4_G | Solvent Accessible VOID(S) in Structure .....    | !     | Info   |
| PLAT789_ALERT_4_G | Atoms with Negative _atom_site_disorder_group #  | 3     | Check  |
| PLAT794_ALERT_5_G | Tentative Bond Valency for Y1 (III) .            | 2.93  | Info   |
| PLAT804_ALERT_5_G | Number of ARU-Code Packing Problem(s) in PLATON  | 9     | Info   |
| PLAT860_ALERT_3_G | Number of Least-Squares Restraints .....         | 194   | Note   |
| PLAT869_ALERT_4_G | ALERTS Related to the Use of SQUEEZE Suppressed  | !     | Info   |

|                   |                                                  |             |
|-------------------|--------------------------------------------------|-------------|
| PLAT870_ALERT_4_G | ALERTS Related to Twinning Effects Suppressed .. | ! Info      |
| PLAT883_ALERT_1_G | No Info/Value for _atom_sites_solution_primary . | Please Do ! |
| PLAT909_ALERT_3_G | Percentage of I>2sig(I) Data at Theta(Max) Still | 50% Note    |
| PLAT913_ALERT_3_G | Missing # of Very Strong Reflections in FCF .... | 1 Note      |

---

|    |                      |                                                              |
|----|----------------------|--------------------------------------------------------------|
| 0  | <b>ALERT level A</b> | = Most likely a serious problem - resolve or explain         |
| 5  | <b>ALERT level B</b> | = A potentially serious problem, consider carefully          |
| 17 | <b>ALERT level C</b> | = Check. Ensure it is not caused by an omission or oversight |
| 25 | <b>ALERT level G</b> | = General information/check it is not something unexpected   |

  

|    |                     |                                                              |
|----|---------------------|--------------------------------------------------------------|
| 3  | <b>ALERT type 1</b> | CIF construction/syntax error, inconsistent or missing data  |
| 20 | <b>ALERT type 2</b> | Indicator that the structure model may be wrong or deficient |
| 7  | <b>ALERT type 3</b> | Indicator that the structure quality may be low              |
| 14 | <b>ALERT type 4</b> | Improvement, methodology, query or suggestion                |
| 3  | <b>ALERT type 5</b> | Informative message, check                                   |

---

It is advisable to attempt to resolve as many as possible of the alerts in all categories. Often the minor alerts point to easily fixed oversights, errors and omissions in your CIF or refinement strategy, so attention to these fine details can be worthwhile. In order to resolve some of the more serious problems it may be necessary to carry out additional measurements or structure refinements. However, the purpose of your study may justify the reported deviations and the more serious of these should normally be commented upon in the discussion or experimental section of a paper or in the "special\_details" fields of the CIF. checkCIF was carefully designed to identify outliers and unusual parameters, but every test has its limitations and alerts that are not important in a particular case may appear. Conversely, the absence of alerts does not guarantee there are no aspects of the results needing attention. It is up to the individual to critically assess their own results and, if necessary, seek expert advice.

### Publication of your CIF in IUCr journals

A basic structural check has been run on your CIF. These basic checks will be run on all CIFs submitted for publication in IUCr journals (*Acta Crystallographica*, *Journal of Applied Crystallography*, *Journal of Synchrotron Radiation*); however, if you intend to submit to *Acta Crystallographica Section C* or *E* or *IUCrData*, you should make sure that full publication checks are run on the final version of your CIF prior to submission.

### Publication of your CIF in other journals

Please refer to the *Notes for Authors* of the relevant journal for any special instructions relating to CIF submission.

---

**PLATON version of 05/12/2020; check.def file version of 05/12/2020**

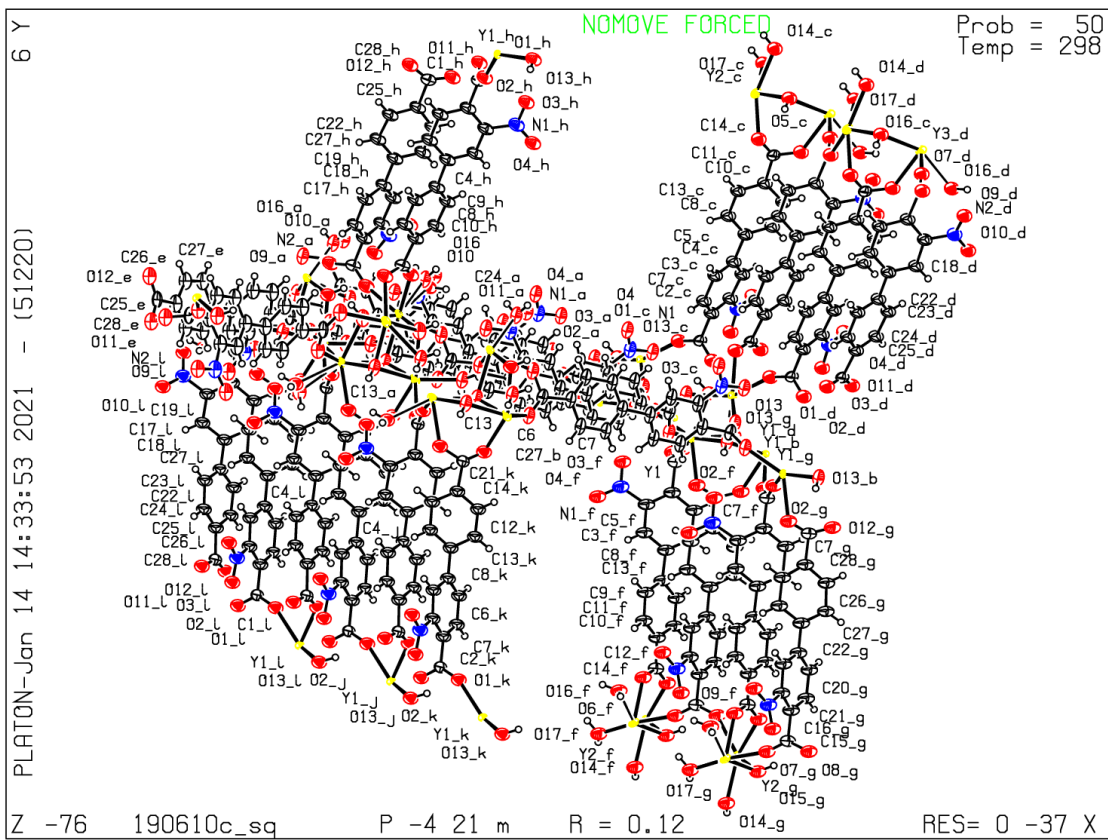

Supplement: s1 [file s1]
