# Supplementary material for: A 12-Connected [Y4((μ3-OH)4]8+ Cluster-Based Luminescent Metal-Organic Framework for Selective Turn-on Detection of F− in H2O
Source: MDPI journal article supplement (doi:10.3390/molecules28041893), 2023-02-16
Supplement: s1 [file s1]

# A 12-Connected $[Y_4(\mu_3\text{-OH})_4]^{8+}$ Cluster-Based Luminescent Metal-organic Framework for Selective Turn-on Detection of $F^-$ in $H_2O$

Juan Li<sup>1, #</sup>, Ai-Rong Wang<sup>1, \*, #</sup>, Shi-Ming Qiu<sup>2, \*</sup>, Xiao-Li Wang<sup>1</sup>, and Jia-Ming Li<sup>1, \*</sup>

<sup>1</sup> Guangxi Key Laboratory of Green Chemical Materials and Safety Technology, College of Petroleum and Chemical Engineering, Beibu Gulf University, Qinzhou 535011, China

<sup>2</sup> College of Chemistry and Biological Engineering, Guangxi Minzu Normal University, Chongzuo 532200, China

\* Correspondence: wangairong@bbgu.edu.cn (A.-R.W.); qiushiming08@mails.uca.ac.cn (S.-M.Q.); jml@bbgu.edu.cn (J.-M.L.)

# Juan Li and Ai-Rong Wang equally contributed to this work.

## Contents

|                                                                                                                                                                                                                                                                                                  |   |
|--------------------------------------------------------------------------------------------------------------------------------------------------------------------------------------------------------------------------------------------------------------------------------------------------|---|
| <b>Figure S1.</b> The asymmetry unit in <b>1</b> .....                                                                                                                                                                                                                                           | 2 |
| <b>Figure S2.</b> The coordination configurations for Y1, Y2 and Y3 ions in <b>1</b> .....                                                                                                                                                                                                       | 2 |
| <b>Figure S3.</b> (a-c) The $\{Y1\}_4$ or $\{O\}_4$ constitutes a tetrahedron in <b>1</b> ; (d-g) The $\{Y2\text{-}Y3\}_4$ or $\{O\}_4$ constitutes a tetrahedron in <b>1</b> ..                                                                                                                 | 2 |
| <b>Figure S4.</b> (a-d) View of the 3D simplified schematic diagram of <b>1</b> and the 3D framework with 1D open channels running in the $[0\ 0\ 1]$ direction.....                                                                                                                             | 3 |
| <b>Figure S5.</b> (a) View one of the $nba^{2-}$ ligand connected with two B and one A clusters in <b>1</b> ; (b) The simplified ligand 3-connected node (sym-metry codes: $v$ , $vi$ , $viii$ , and $ix$ see in the Table S3; $xiv\ 1-x$ , $2-y$ , $-1+z$ ; $xv\ 1-x$ , $1-y$ , $-1+z$ ). ..... | 3 |
| <b>Figure S6.</b> (a) View one of the $nba^{2-}$ ligand connected with two A and one B clusters in <b>1</b> ; (b) The simplified ligand 3-connected node (symmetry codes: $i$ , $ii$ , $iii$ , $v$ , $vi$ , and $ix$ see in the Table S2; $xv\ 1-x$ , $1-y$ , $-1+z$ ) .....                     | 4 |
| <b>Figure S7.</b> Fluorescence intensity of <b>1</b> in different pH aqueous solution with the unintroduct ions (red) and introduction of $F^-$ (magenta) .....                                                                                                                                  | 4 |
| <b>Figure S8.</b> TG curves of compound <b>1</b> .....                                                                                                                                                                                                                                           | 5 |
| <b>Figure S9.</b> The infrared spectra of $H_2nba$ ligand, <b>1</b> before and after $F^-$ sensing.....                                                                                                                                                                                          | 5 |
| <b>Table S1.</b> Crystal structure data for <b>1</b> <sup>a,b,c</sup> .....                                                                                                                                                                                                                      | 6 |
| <b>Table S2.</b> Selected bond lengths/ $\text{\AA}$ and bond angles/ $^\circ$ for compound <b>1</b> .....                                                                                                                                                                                       | 7 |
| <b>Table S3.</b> Selected bond lengths ( $\text{\AA}$ ) and angles (deg) for <b>1</b> with estimated standard deviations in parentheses. ....                                                                                                                                                    | 9 |

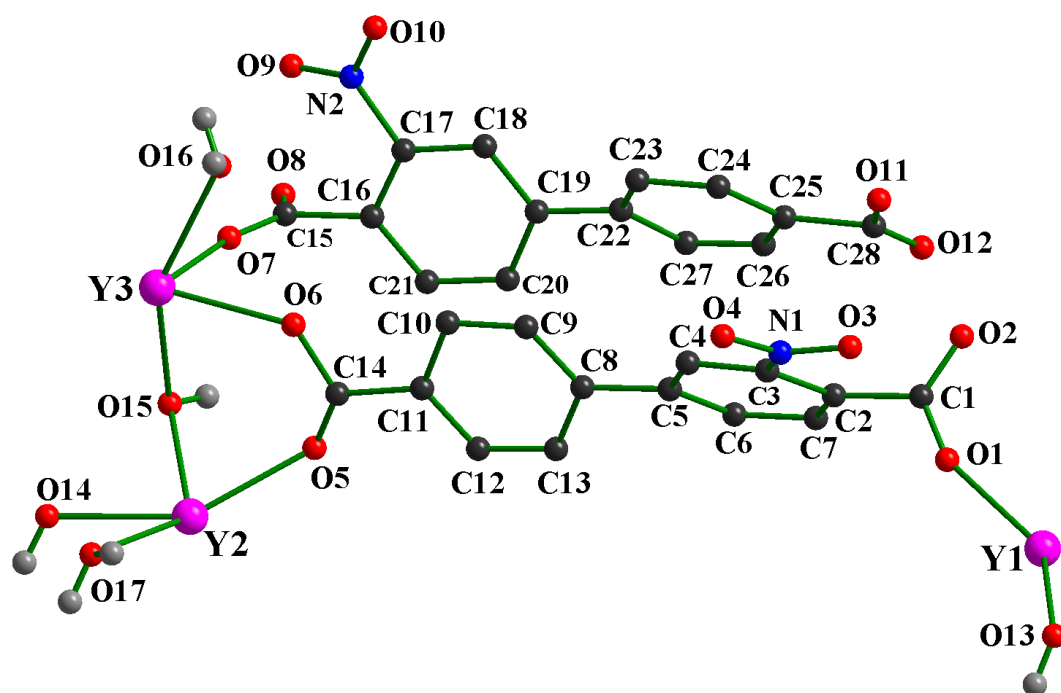

Figure S1. The asymmetry unit in 1.

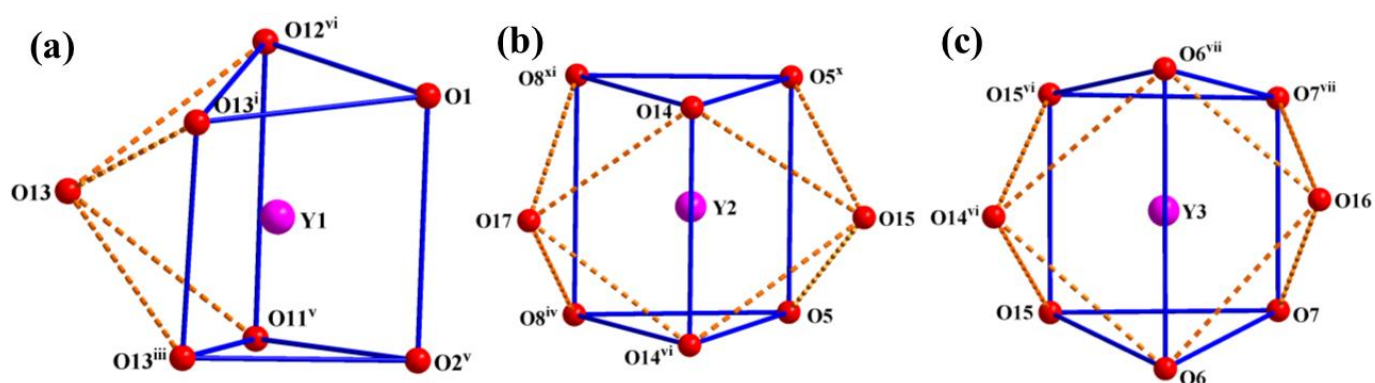

Figure S2. The coordination configurations for Y1, Y2 and Y3 ions in 1.

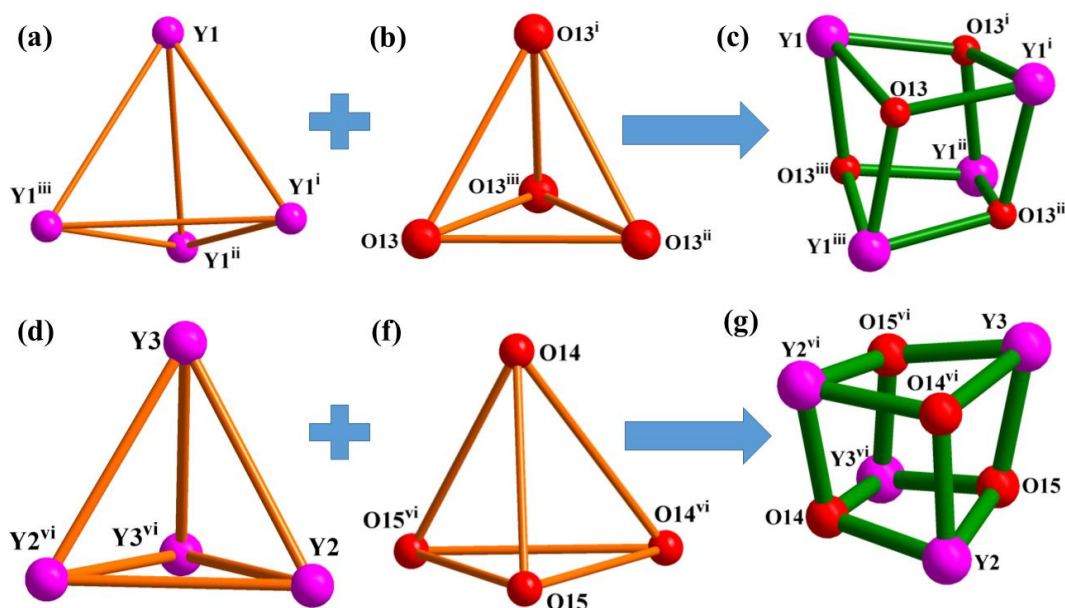

Figure S3. (a-c) The  $\{Y1\}_4$  or  $\{O\}_4$  constitutes a tetrahedron in 1; (d-g) The  $\{Y2-Y3\}_4$  or  $\{O\}_4$  constitutes a tetrahedron in 1.

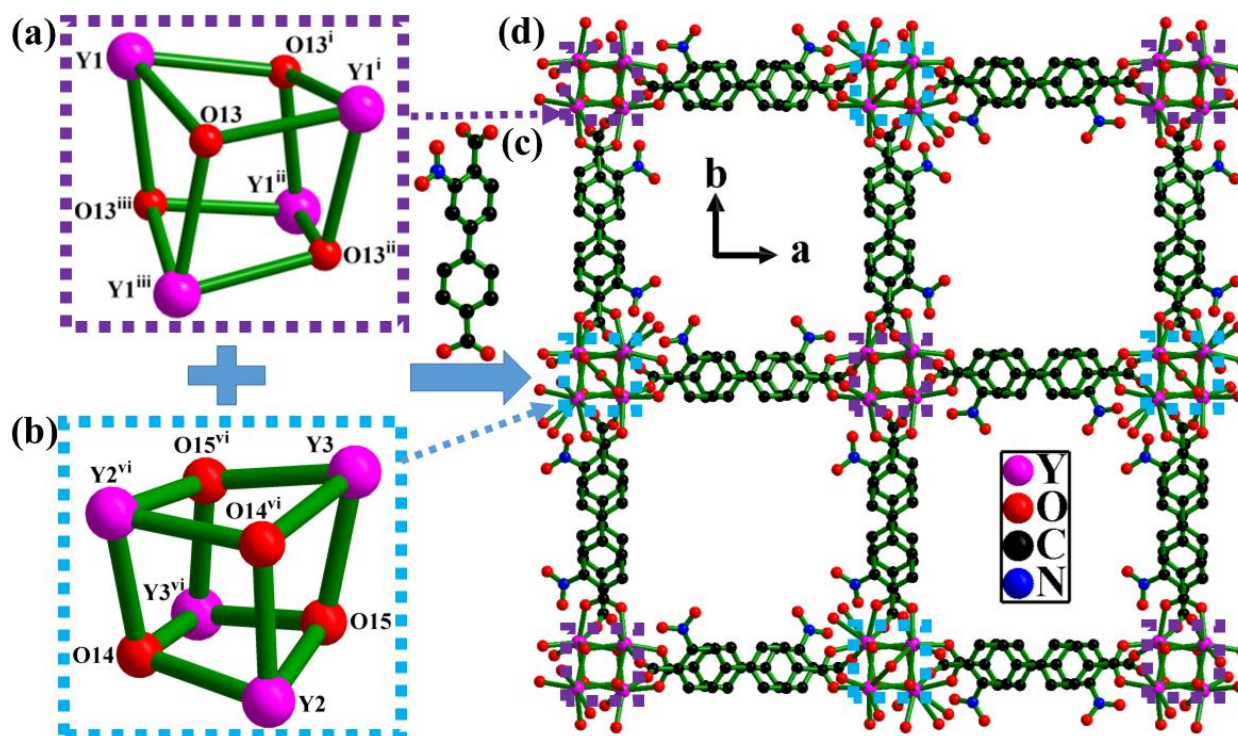

**Figure S4.** (a-d) View of the 3D simplified schematic diagram of **1** and the 3D framework with 1D open channels running in the  $[0\ 0\ 1]$  direction.

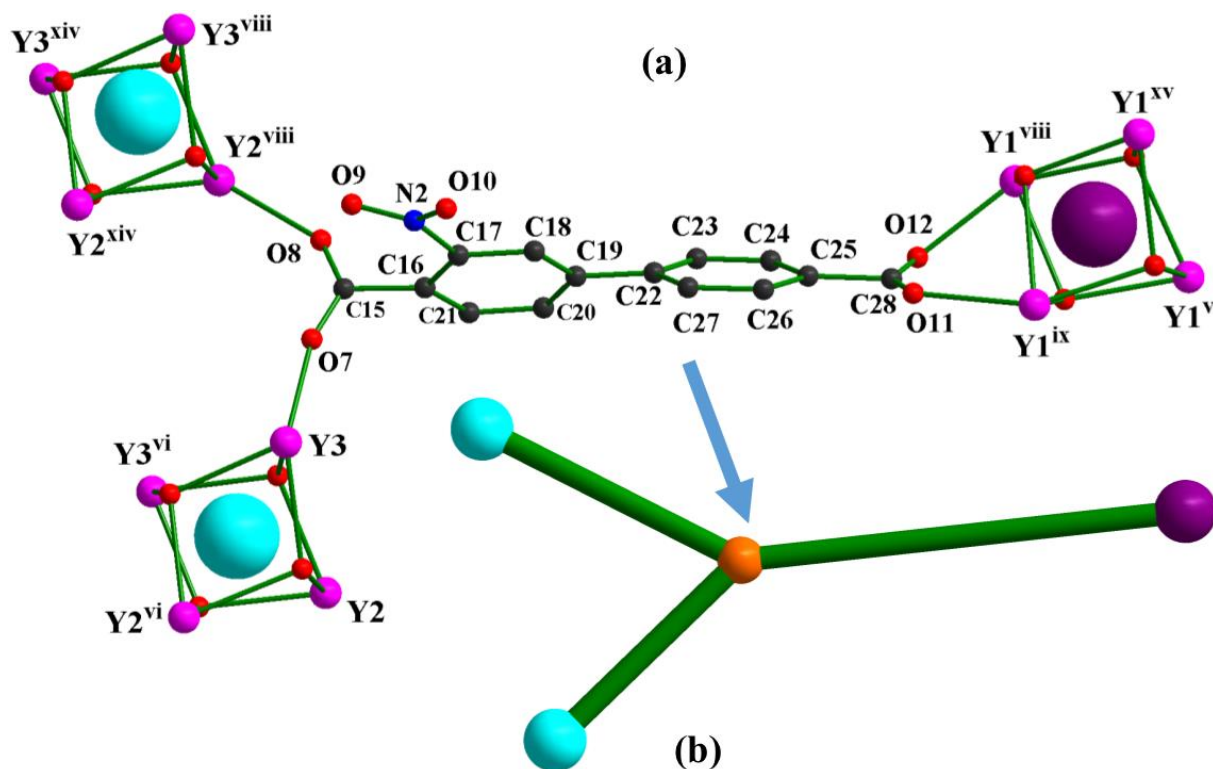

**Figure S5.** (a) View one of the  $\text{nba}^{2-}$  ligand connected with two B and one A clusters in **1**; (b) The simplified ligand 3-connected node (symmetry codes: v, vi, viii, and ix see in the Table S3; xiv  $1-x, 2-y, -1+z$ ; xv  $1-x, 1-y, -1+z$ ).

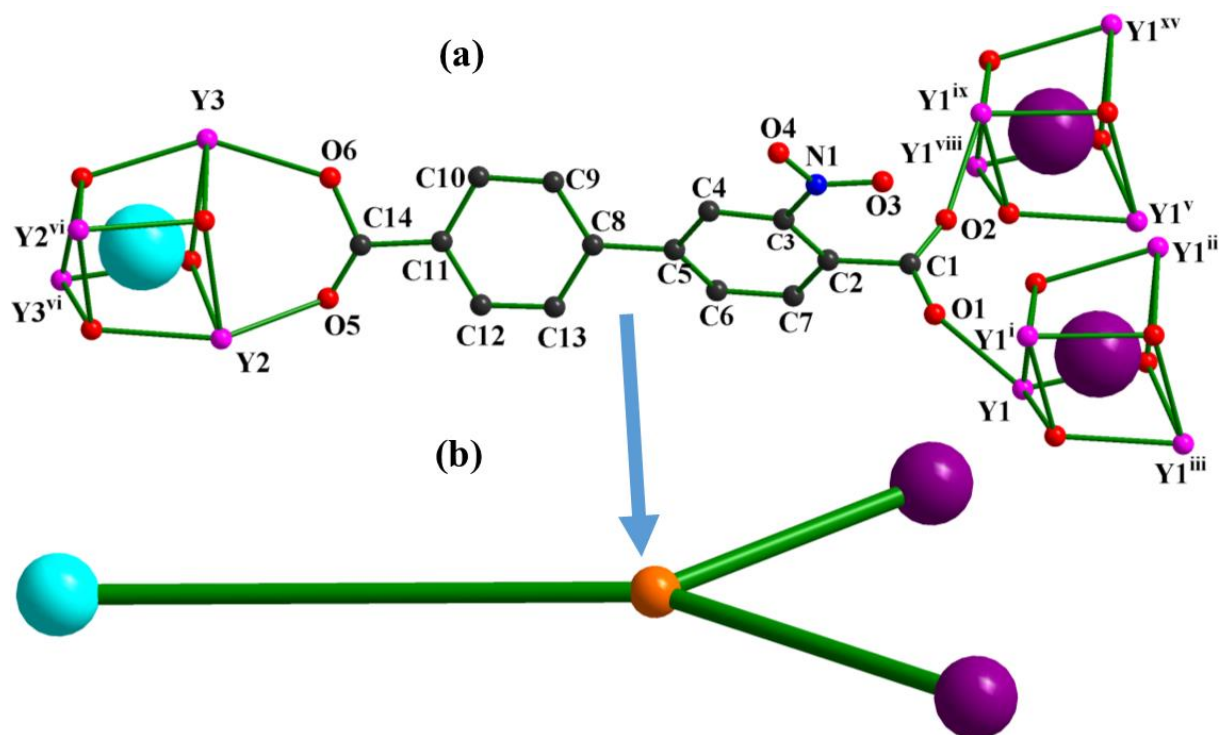

**Figure S6.** (a) View one of the  $\text{nba}^{2-}$  ligand connected with two A and one B clusters in **1**; (b) The simplified ligand 3-connected node (symmetry codes: i, ii, iii, v, vi, and ix see in the Table S2; xv 1-x, 1-y, -1+z).

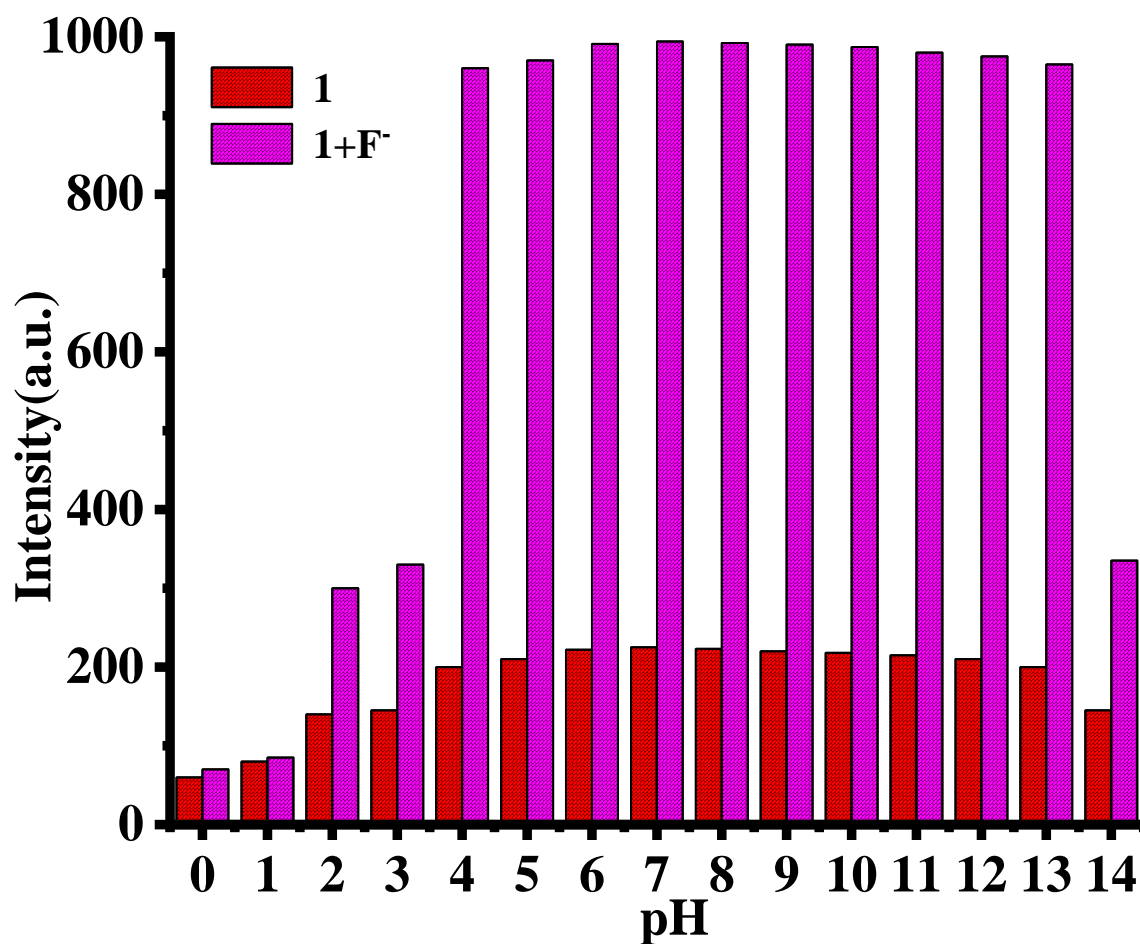

**Figure S7.** Fluorescence intensity of **1** in different pH aqueous solution with the un introduction ions (red) and introduction of  $\text{F}^-$  (magenta).

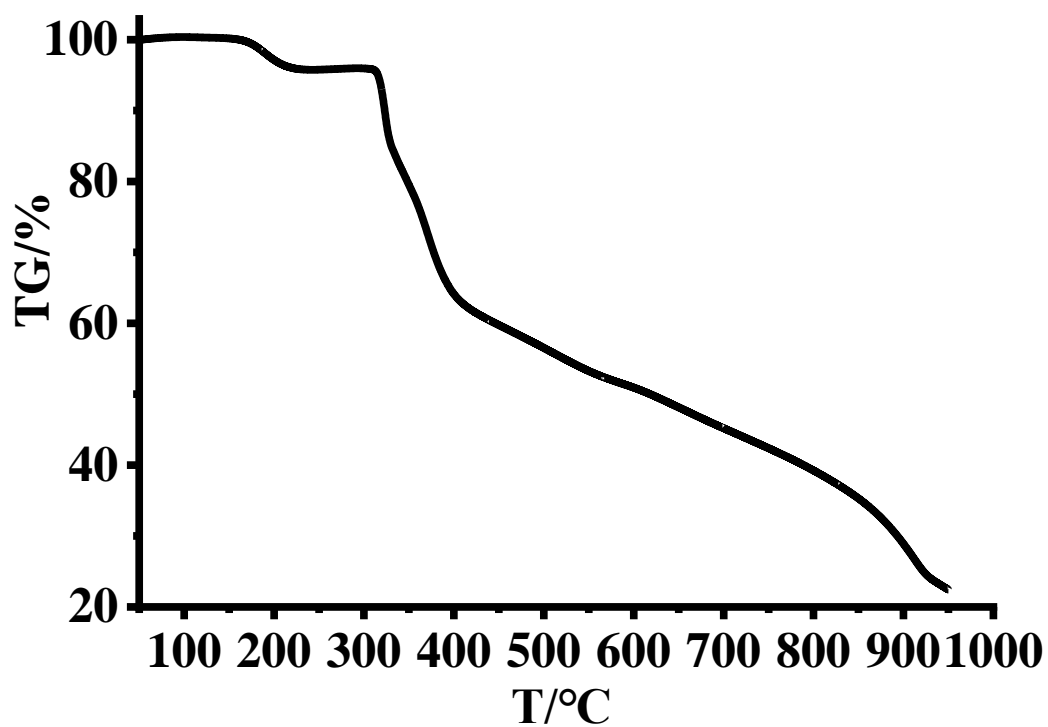

Figure S8. TG curves of compound 1.

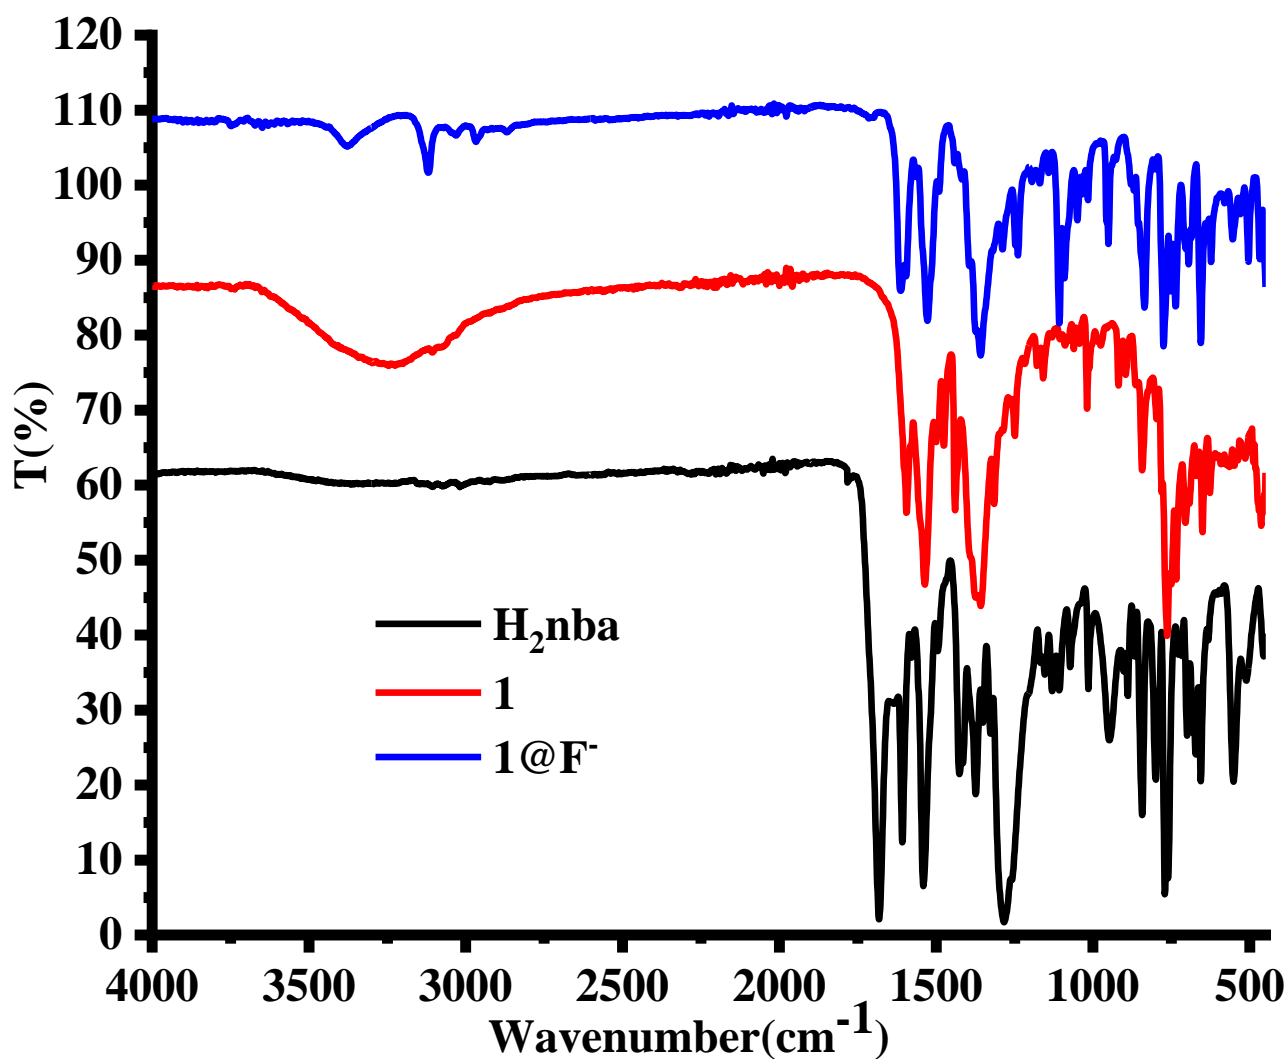

Figure S9. The infrared spectra of H<sub>2</sub>nba ligand, 1 before and after F<sup>-</sup> sensing.

**Table S1.** Crystal structure data for **1**<sup>a,b,c</sup>.

| Compound                                                                                              | <b>1</b>                                                                       |
|-------------------------------------------------------------------------------------------------------|--------------------------------------------------------------------------------|
| Empirical formula                                                                                     | C <sub>112</sub> H <sub>70</sub> N <sub>8</sub> O <sub>59</sub> Y <sub>8</sub> |
| Formula weight                                                                                        | 3183.04                                                                        |
| Crystal system                                                                                        | tetragonal                                                                     |
| Space group                                                                                           | <i>P</i> $\bar{4}$ <sub>2</sub> <i>m</i>                                       |
| <i>a</i> , Å                                                                                          | 33.7993(10)                                                                    |
| <i>b</i> , Å                                                                                          | 33.7993(10)                                                                    |
| <i>c</i> , Å                                                                                          | 7.9398(5)                                                                      |
| $\alpha$ , deg                                                                                        | 90                                                                             |
| $\beta$ , deg                                                                                         | 90                                                                             |
| $\gamma$ , deg                                                                                        | 90                                                                             |
| <i>V</i> , Å <sup>3</sup>                                                                             | 9070.4(8)                                                                      |
| <i>Z</i>                                                                                              | 2                                                                              |
| <i>D</i> <sub>calcd</sub> , g cm <sup>-3</sup>                                                        | 1.165                                                                          |
| $\mu$ (MoK $\alpha$ ), mm <sup>-1</sup>                                                               | 2.598                                                                          |
| <i>F</i> (000), e                                                                                     | 3164                                                                           |
| <i>hkl</i> range                                                                                      | -40→33, $\pm$ 40, -7→9                                                         |
| ((sin $\theta$ )/ $\lambda$ ) <sub>max</sub> , Å <sup>-1</sup>                                        | 0.617                                                                          |
| Refl. measured                                                                                        | 33572                                                                          |
| Refl. unique                                                                                          | 8216                                                                           |
| <i>R</i> <sub>int</sub>                                                                               | 0.1128                                                                         |
| Param. refined                                                                                        | 178                                                                            |
| <i>R</i> <sub>1</sub> <sup>a</sup> / <i>wR</i> <sub>2</sub> <sup>b</sup> [ <i>I</i> > 2σ( <i>I</i> )] | 0.1209/ 0.3069                                                                 |
| <i>R</i> <sub>1</sub> <sup>a</sup> / <i>wR</i> <sub>2</sub> <sup>b</sup> (all data)                   | 0.1419/0.3291                                                                  |
| GoF ( <i>F</i> <sup>2</sup> ) <sup>c</sup>                                                            | 1.053                                                                          |
| $\Delta\rho_{\text{fin}}$ (max/min), e Å <sup>-3</sup>                                                | 3.59/-4.68                                                                     |

<sup>a</sup>  $R = \sum ||F_o| - |F_c|| / \sum |F_o|$ ; <sup>b</sup>  $wR = [\sum w(F_o^2 - F_c^2)^2 / \sum w(F_o^2)^2]^{1/2}$ ,  $w = [\sigma^2(F_o)^2 + (AP)^2 + BP]^{-1}$ , where  $P = (\text{Max}(F_o^2, 0) + 2F_c^2)/3$ ; <sup>c</sup> GoF =  $[\sum w(F_o^2 - F_c^2)^2 / (n_{\text{obs}} - n_{\text{param}})]^{1/2}$ .

**Table S2.** Selected bond lengths/Å and bond angles/° for compound **1**

| Compound <b>1</b> <sup>a</sup>           |           |                                         |           |
|------------------------------------------|-----------|-----------------------------------------|-----------|
| Y1-Y1 <sup>i</sup>                       | 3.708(2)  | Y2-Y2 <sup>vi</sup>                     | 3.618(5)  |
| Y1-Y1 <sup>ii</sup>                      | 3.790(3)  | Y3-Y3 <sup>vi</sup>                     | 3.896(4)  |
| Y1-Y1 <sup>iii</sup>                     | 3.708(2)  | Y3-Y2                                   | 3.761(3)  |
| Y1-O1                                    | 2.280(14) | Y3-Y2 <sup>vi</sup>                     | 3.761(3)  |
| Y1-O11 <sup>v</sup>                      | 2.333(15) | Y1-O2 <sup>v</sup>                      | 2.344(15) |
| Y1-O13                                   | 2.463(16) | Y1-O13 <sup>i</sup>                     | 2.353(14) |
| Y1-O13 <sup>iii</sup>                    | 2.325(16) | Y1-O12 <sup>iv</sup>                    | 2.315(15) |
| Y2-O5                                    | 2.320(15) | Y2-O5 <sup>x</sup>                      | 2.309(15) |
| Y2-O8 <sup>xi</sup>                      | 2.327(15) | Y2 <sup>viii</sup> -O8                  | 2.333(15) |
| Y2-O14                                   | 2.378(14) | Y2-O14 <sup>vi</sup>                    | 2.378(14) |
| Y2-O15                                   | 2.35(2)   | Y2-O17                                  | 2.51(2)   |
| Y3-O6                                    | 2.375(14) | Y3-O6 <sup>vii</sup>                    | 2.375(15) |
| Y3-O7                                    | 2.264(16) | Y3-O7 <sup>vii</sup>                    | 2.264(16) |
| Y3-O14 <sup>vi</sup>                     | 2.37(2)   | Y3-O15                                  | 2.412(13) |
| Y3-O16                                   | 2.49(2)   | Y3-O15 <sup>vi</sup>                    | 2.412(13) |
| O1-Y1-O12 <sup>iv</sup>                  | 71.1(6)   | O1-Y1-O11 <sup>v</sup>                  | 131.5(6)  |
| O1-Y1-O2 <sup>v</sup>                    | 80.5(6)   | O1-Y1-O13                               | 135.8(6)  |
| O1-Y1-O13 <sup>i</sup>                   | 126.4(5)  | O1-Y1-O13 <sup>iii</sup>                | 77.8(6)   |
| O12 <sup>iv</sup> -Y1-O11 <sup>v</sup>   | 95.4(6)   | O12 <sup>iv</sup> -Y1-O2 <sup>v</sup>   | 140.0(6)  |
| O12 <sup>iv</sup> -Y1-O13 <sup>iii</sup> | 89.5(6)   | O12 <sup>iv</sup> -Y1-O13 <sup>i</sup>  | 147.7(6)  |
| O12 <sup>iv</sup> -Y1-O13                | 73.9(5)   | O11 <sup>v</sup> -Y1-O2 <sup>v</sup>    | 82.5(5)   |
| O11 <sup>v</sup> -Y1-O13 <sup>iii</sup>  | 150.3(6)  | O11 <sup>v</sup> -Y1-O13                | 77.5(5)   |
| O2 <sup>v</sup> -Y1-O13                  | 142.5(5)  | O2 <sup>v</sup> -Y1-O13 <sup>iii</sup>  | 111.8(5)  |
| O13 <sup>i</sup> -Y1-O11 <sup>v</sup>    | 90.0(5)   | O13 <sup>i</sup> -Y1-O2 <sup>v</sup>    | 72.3(6)   |
| O13 <sup>i</sup> -Y1-O13                 | 76.3(6)   | O13 <sup>i</sup> -Y1-O13 <sup>iii</sup> | 71.2(6)   |
| O13 <sup>iii</sup> -Y1-O13               | 75.8(6)   | O6 <sup>vi</sup> -Y3-O6                 | 105.8(8)  |
| O6-Y3-O16                                | 72.8(8)   | O6 <sup>vi</sup> -Y3-O16                | 63.2(8)   |

|                                         |          |                                           |          |
|-----------------------------------------|----------|-------------------------------------------|----------|
| O6-Y3-O15                               | 83.6(6)  | O6-Y3-O15 <sup>vii</sup>                  | 143.2(7) |
| O6 <sup>vi</sup> -Y3-O15                | 143.2(7) | O6 <sup>vi</sup> -Y3-O15 <sup>vii</sup>   | 83.6(6)  |
| O5 <sup>x</sup> -Y2-O5                  | 80.8(9)  | O5-Y2-O8 <sup>xi</sup>                    | 122.9(6) |
| O5-Y2-O8 <sup>iv</sup>                  | 72.2(5)  | O7-Y3-O6                                  | 79.8(6)  |
| O5 <sup>x</sup> -Y2-O8 <sup>iv</sup>    | 122.9(6) | O7 <sup>vi</sup> -Y3-O6                   | 140.1(6) |
| O5 <sup>x</sup> -Y2-O8 <sup>xi</sup>    | 72.3(5)  | O7 <sup>vi</sup> -Y3-O6 <sup>vi</sup>     | 79.8(6)  |
| O7-Y3-O6 <sup>vi</sup>                  | 140.1(6) | O7-Y3-O7 <sup>vi</sup>                    | 72.5(8)  |
| O5 <sup>x</sup> -Y2-O14 <sup>vii</sup>  | 145.0(7) | O7-Y3-O16                                 | 82.0(8)  |
| O5-Y2-O14                               | 145.0(7) | O7 <sup>vi</sup> -Y3-O16                  | 75.3(7)  |
| O5-Y2-O14 <sup>vii</sup>                | 89.8(6)  | O5 <sup>x</sup> -Y2-O14                   | 89.8(6)  |
| O5 <sup>x</sup> -Y2-O17                 | 138.9(4) | O5-Y2-O17                                 | 138.9(4) |
| O5-Y2-O15                               | 71.1(6)  | O7 <sup>vi</sup> -Y3-O14 <sup>vii</sup>   | 142.0(4) |
| O5 <sup>x</sup> -Y2-O15                 | 71.1(6)  | O7-Y3-O14 <sup>vii</sup>                  | 142.0(4) |
| O7-Y3-O15                               | 76.1(7)  | O7 <sup>vi</sup> -Y3-O15 <sup>vii</sup>   | 76.1(7)  |
| O7-Y3-O15 <sup>vii</sup>                | 115.8(6) | O7 <sup>vi</sup> -Y3-O15                  | 115.8(6) |
| O8 <sup>xi</sup> -Y2-O8 <sup>iv</sup>   | 81.6(8)  | O8 <sup>iv</sup> -Y2-O14                  | 138.0(6) |
| O8 <sup>iv</sup> -Y2-O14 <sup>vii</sup> | 85.1(7)  | O8 <sup>xi</sup> -Y2-O14                  | 85.1(6)  |
| O8 <sup>xi</sup> -Y2-O14 <sup>vii</sup> | 138.0(6) | O8 <sup>xi</sup> -Y2-O17                  | 75.0(6)  |
| O14 <sup>vii</sup> -Y3-O6 <sup>vi</sup> | 75.3(5)  | O8 <sup>iv</sup> -Y2-O17                  | 75.0(6)  |
| O14 <sup>vii</sup> -Y3-O6               | 75.3(5)  | O8 <sup>iv</sup> -Y2-O15                  | 137.4(4) |
| O14 <sup>vii</sup> -Y3-O16              | 116.4(8) | O14 <sup>vii</sup> -Y3-O15                | 73.0(7)  |
| O8 <sup>xi</sup> -Y2-O15                | 137.4(4) | O14 <sup>vii</sup> -Y3-O15 <sup>vii</sup> | 73.0(7)  |
| O15 <sup>vii</sup> -Y3-O16              | 139.2(9) | O15-Y3-O16                                | 150.3(9) |
| O14 <sup>vii</sup> -Y2-O14              | 78.7(9)  | O14 <sup>vii</sup> -Y2-O17                | 63.2(6)  |
| O14-Y2-O17                              | 63.2(6)  | O15 <sup>vii</sup> -Y3-O15                | 69.7(9)  |
| O15-Y2-O14 <sup>vii</sup>               | 74.0(7)  | O15-Y2-O14                                | 74.0(7)  |

<sup>a</sup>Symmetry codes: i y, 1-x, 3-z; ii 1-x, 1-y, z; iii 1-y, x, 3-z; iv x, y, 1+z; v 1-y, x, 2-z; vi 1-x, 2-y, z; vii 3/2-y, 3/2-x, z; viii x, y, -1+z; ix y, 1-x, 2-z; x -1/2+y, 1/2+x, z; xi -1/2+y, 1/2+x, 1+z.



**Table S3.** Selected bond lengths (Å) and angles (deg) for **1** and **2** with estimated standard deviations in parentheses.

| D-H...A                        | d(D-H) | d(H...A) | d(D...A) | ∠(DHA) |
|--------------------------------|--------|----------|----------|--------|
| Compound <b>1</b> <sup>a</sup> |        |          |          |        |
| O17-H17A...O7 <sup>vi</sup>    | 0.85   | 2.17     | 2.88(2)  | 141.4  |
| O17-H17A...O7 <sup>xi</sup>    | 0.85   | 2.17     | 2.88(2)  | 141.4  |
| O17-H17B...O7 <sup>xii</sup>   | 0.85   | 2.17     | 2.88(2)  | 141.4  |
| O17-H17B...O7 <sup>xiii</sup>  | 0.85   | 2.17     | 2.88(2)  | 141.4  |
| O13-H13A...O2 <sup>iv</sup>    | 0.85   | 2.44     | 2.76(2)  | 102    |
| O14-H14...O9 <sup>xii</sup>    | 0.85   | 2.49     | 3.25(2)  | 150    |
| O14-H14...O9 <sup>xi</sup>     | 0.85   | 2.49     | 3.25(2)  | 150    |
| O16-H16A...N2 <sup>vii</sup>   | 0.85   | 2.30     | 3.15(3)  | 174    |
| C26-H26...O12                  | 0.93   | 2.39     | 2.74(2)  | 101    |

<sup>a</sup>Symmetry codes: iv  $x, y, 1+z$ ; vi  $1-x, 2-y, z$ ; vii  $3/2-y, 3/2-x, z$ ; xi  $-1/2+y, 1/2+x, 1+z$ ; xii  $1-x, 2-y, 1+z$ ; xiii  $3/2-y, 3/2-x, 1+z$ .
