# Supplementary material for: A 12-Connected [Y4((μ3-OH)4]8+ Cluster-Based Luminescent Metal-Organic Framework for Selective Turn-on Detection of F− in H2O
Source: Molecules. 2023 Feb 16;28(4):1893. doi: 10.3390/molecules28041893 (PMC9960892; doi:10.3390/molecules28041893)
Supplement: Supplementary file 1 [file molecules-28-01893-s001.zip › 1.cif]

data_190610c_sq
_audit_creation_date               2021-01-14
_audit_creation_method
;
Olex2 1.3
(compiled 2020.11.12 svn.r5f609507 for OlexSys, GUI svn.r6226)
;
_shelx_SHELXL_version_number       '2018/3'
_audit_contact_author_address      ?
_audit_contact_author_email        ?
_audit_contact_author_name         ''
_audit_contact_author_phone        ?
_publ_contact_author_id_orcid      ?
_publ_section_references
;
Dolomanov, O.V., Bourhis, L.J., Gildea, R.J, Howard, J.A.K. & Puschmann, H.
 (2009), J. Appl. Cryst. 42, 339-341.

Sheldrick, G.M. (2015). Acta Cryst. A71, 3-8.

Sheldrick, G.M. (2015). Acta Cryst. C71, 3-8.
;
_chemical_name_common              ?
_chemical_name_systematic          ?
_chemical_formula_moiety           'C112 H70 N8 O59 Y8'
_chemical_formula_sum              'C112 H70 N8 O59 Y8'
_chemical_formula_weight           3183.04
_chemical_absolute_configuration   ?
_chemical_melting_point            ?
loop_
  _atom_type_symbol
  _atom_type_description
  _atom_type_scat_dispersion_real
  _atom_type_scat_dispersion_imag
  _atom_type_scat_source
 'C' 'C' 0.0033 0.0016 'International Tables Vol C Tables 4.2.6.8 and 6.1.1.4'
 'H' 'H' 0.0000 0.0000 'International Tables Vol C Tables 4.2.6.8 and 6.1.1.4'
 'N' 'N' 0.0061 0.0033 'International Tables Vol C Tables 4.2.6.8 and 6.1.1.4'
 'O' 'O' 0.0106 0.0060 'International Tables Vol C Tables 4.2.6.8 and 6.1.1.4'
 'Y' 'Y' -2.7962 3.5667 'International Tables Vol C Tables 4.2.6.8 and 6.1.1.4'

_shelx_space_group_comment
;
The symmetry employed for this shelxl refinement is uniquely defined
by the following loop, which should always be used as a source of
symmetry information in preference to the above space-group names.
They are only intended as comments.
;
_space_group_crystal_system        'tetragonal'
_space_group_IT_number             113
_space_group_name_H-M_alt          'P -4 21 m'
_space_group_name_Hall             'P -4 2ab'
loop_
  _space_group_symop_operation_xyz
 'x, y, z'
 '-x, -y, z'
 'y, -x, -z'
 '-y, x, -z'
 '-x+1/2, y+1/2, -z'
 'x+1/2, -y+1/2, -z'
 '-y+1/2, -x+1/2, z'
 'y+1/2, x+1/2, z'

_cell_length_a                     33.7993(10)
_cell_length_b                     33.7993(10)
_cell_length_c                     7.9398(5)
_cell_angle_alpha                  90
_cell_angle_beta                   90
_cell_angle_gamma                  90
_cell_volume                       9070.4(8)
_cell_formula_units_Z              2
_cell_measurement_reflns_used      7950
_cell_measurement_temperature      298.15
_cell_measurement_theta_max        24.6780
_cell_measurement_theta_min        2.4540
_shelx_estimated_absorpt_T_max     0.697
_shelx_estimated_absorpt_T_min     0.563
_exptl_absorpt_coefficient_mu      2.598
_exptl_absorpt_correction_T_max    1.00000
_exptl_absorpt_correction_T_min    0.26247
_exptl_absorpt_correction_type     multi-scan
_exptl_absorpt_process_details
;
CrysAlisPro 1.171.39.34a (Rigaku Oxford Diffraction, 2017)
Empirical absorption correction using spherical harmonics,
 implemented in SCALE3 ABSPACK scaling algorithm.
;
_exptl_absorpt_special_details     ?
_exptl_crystal_colour              brown
_exptl_crystal_colour_primary      brown
_exptl_crystal_density_diffrn      1.165
_exptl_crystal_density_meas        ?
_exptl_crystal_density_method      ?
_exptl_crystal_description         cubic
_exptl_crystal_F_000               3164
_exptl_crystal_size_max            0.25
_exptl_crystal_size_mid            0.2
_exptl_crystal_size_min            0.15
_exptl_transmission_factor_max     ?
_exptl_transmission_factor_min     ?
_diffrn_reflns_av_R_equivalents    0.1128
_diffrn_reflns_av_unetI/netI       0.1011
_diffrn_reflns_Laue_measured_fraction_full  0.999
_diffrn_reflns_Laue_measured_fraction_max  0.999
_diffrn_reflns_limit_h_max         33
_diffrn_reflns_limit_h_min         -40
_diffrn_reflns_limit_k_max         40
_diffrn_reflns_limit_k_min         -40
_diffrn_reflns_limit_l_max         9
_diffrn_reflns_limit_l_min         -7
_diffrn_reflns_number              33572
_diffrn_reflns_point_group_measured_fraction_full  0.989
_diffrn_reflns_point_group_measured_fraction_max  0.989
_diffrn_reflns_theta_full          25.100
_diffrn_reflns_theta_max           25.100
_diffrn_reflns_theta_min           2.410
_diffrn_ambient_temperature        298.15
_diffrn_detector                   'CCD plate'
_diffrn_detector_area_resol_mean   ?
_diffrn_measured_fraction_theta_full  0.999
_diffrn_measured_fraction_theta_max  0.999
_diffrn_measurement_details
;
List of Runs (angles in degrees, time in seconds):

  # Type    Start    End  Width  t~exp~   \w     \q     \k     \f   Frames
--------------------------------------------------------------------------
  1  \w      2.00  46.00   1.00   18.00    --   30.00  54.00-180.00   44
  2  \w    -74.00 109.00   1.00   18.00    --   30.00  54.00 -90.00  183
;
_diffrn_measurement_device         'two-circle diffractometer'
_diffrn_measurement_device_type    'XtaLAB Mini (ROW)'
_diffrn_measurement_method         '\w scans'
_diffrn_orient_matrix_type        
 'CrysAlisPro convention (1999,Acta A55,543-557)'
_diffrn_orient_matrix_UB_11        -0.0202156000
_diffrn_orient_matrix_UB_12        -0.0052422000
_diffrn_orient_matrix_UB_13        -0.0083443000
_diffrn_orient_matrix_UB_21        -0.0027948000
_diffrn_orient_matrix_UB_22        0.0030621000
_diffrn_orient_matrix_UB_23        0.0877180000
_diffrn_orient_matrix_UB_31        -0.0048638000
_diffrn_orient_matrix_UB_32        0.0200741000
_diffrn_orient_matrix_UB_33        -0.0153511000
_diffrn_radiation_monochromator    graphite
_diffrn_radiation_probe            x-ray
_diffrn_radiation_type             'Mo K\a'
_diffrn_radiation_wavelength       0.71073
_diffrn_source                     'fine-focus sealed X-ray tube'
_diffrn_source_type                'Rigaku (Mo) X-ray Source'
_reflns_Friedel_coverage           0.779
_reflns_Friedel_fraction_full      0.977
_reflns_Friedel_fraction_max       0.977
_reflns_number_gt                  6343
_reflns_number_total               8216
_reflns_odcompleteness_completeness  99.85
_reflns_odcompleteness_iscentric   1
_reflns_odcompleteness_theta       26.32
_reflns_special_details
;
 Reflections were merged by SHELXL according to the crystal
 class for the calculation of statistics and refinement.
 
 Structure factors included contributions from the .fab file.
 
 _reflns_Friedel_fraction is defined as the number of unique
 Friedel pairs measured divided by the number that would be
 possible theoretically, ignoring centric projections and
 systematic absences. Completness statistics refer to single and
 composite reflections containing twin component 1 only.
;
_reflns_threshold_expression       'I > 2\s(I)'
_computing_cell_refinement         'CrysAlisPro 1.171.39.34a (Rigaku OD, 2017)'
_computing_data_collection         'CrysAlisPro 1.171.39.34a (Rigaku OD, 2017)'
_computing_data_reduction          'CrysAlisPro 1.171.39.34a (Rigaku OD, 2017)'
_computing_molecular_graphics      'Olex2 1.3 (Dolomanov et al., 2009)'
_computing_publication_material    'Olex2 1.3 (Dolomanov et al., 2009)'
_computing_structure_refinement    'SHELXL 2018/3 (Sheldrick, 2015)'
_computing_structure_solution      'SHELXT 2014/5 (Sheldrick, 2014)'
_refine_diff_density_max           3.594
_refine_diff_density_min           -4.683
_refine_diff_density_rms           0.231
_refine_ls_abs_structure_details
;
 Refined as an inversion twin.
;
_refine_ls_abs_structure_Flack     0.49(3)
_refine_ls_extinction_coef         .
_refine_ls_extinction_method       none
_refine_ls_goodness_of_fit_ref     1.053
_refine_ls_hydrogen_treatment      constr
_refine_ls_matrix_type             full
_refine_ls_number_parameters       178
_refine_ls_number_reflns           8216
_refine_ls_number_restraints       194
_refine_ls_R_factor_all            0.1419
_refine_ls_R_factor_gt             0.1209
_refine_ls_restrained_S_all        1.051
_refine_ls_shift/su_max            0.000
_refine_ls_shift/su_mean           0.000
_refine_ls_structure_factor_coef   Fsqd
_refine_ls_weighting_details      
 'w=1/[\s^2^(Fo^2^)+(0.1949P)^2^+83.2242P] where P=(Fo^2^+2Fc^2^)/3'
_refine_ls_weighting_scheme        calc
_refine_ls_wR_factor_gt            0.3069
_refine_ls_wR_factor_ref           0.3291
_refine_special_details
;
 Refined as a 2-component inversion twin.
;
_olex2_refinement_description
;
1. Twinned data refinement
 Scales: 0.51(3)
 0.49(3)
2. Fixed Uiso
 At 1.2 times of:
  All C(H) groups
 At 1.5 times of:
  All O(H) groups, All O(H,H) groups
3. Restrained distances
 O9-N2
 1.23 with sigma of 0.02
 N2-O10
 1.23 with sigma of 0.02
 C4-C3
 1.4 with sigma of 0.02
 N1-O3
 1.2 with sigma of 0.02
 C21-C16
 1.4 with sigma of 0.02
 N1-O4
 1.2 with sigma of 0.02
 O12-C28
 1.2 with sigma of 0.02
 C2-C7
 1.4 with sigma of 0.02
 C28-O11
 1.2 with sigma of 0.02
 C12-C11
 1.4 with sigma of 0.02
 O8-C15
 1.2 with sigma of 0.02
 C19-C20
 1.4 with sigma of 0.02
 C15-O7
 1.2 with sigma of 0.02
 C17-C18
 1.4 with sigma of 0.02
 O2-C1
 1.2 with sigma of 0.02
 C6-C5
 1.4 with sigma of 0.02
 C1-O1
 1.2 with sigma of 0.02
 C8-C13
 1.4 with sigma of 0.02
 C10-C9
 1.4 with sigma of 0.02
 C25-C28
 1.53 with sigma of 0.02
 C20-C21
 1.4 with sigma of 0.02
 C2-C1
 1.53 with sigma of 0.02
 C16-C17
 1.4 with sigma of 0.02
 C16-C15
 1.53 with sigma of 0.02
 C18-C19
 1.4 with sigma of 0.02
 C14-C11
 1.53 with sigma of 0.02
 C7-C6
 1.4 with sigma of 0.02
 C25-C26
 1.4 with sigma of 0.02
 C5-C4
 1.4 with sigma of 0.02
 C26-C27
 1.4 with sigma of 0.02
 C3-C2
 1.4 with sigma of 0.02
 C27-C22
 1.4 with sigma of 0.02
 C13-C12
 1.4 with sigma of 0.02
 C22-C23
 1.4 with sigma of 0.02
 C11-C10
 1.4 with sigma of 0.02
 C23-C24
 1.4 with sigma of 0.02
 C9-C8
 1.4 with sigma of 0.02
 C24-C25
 1.4 with sigma of 0.02
 C19-C22
 1.5 with sigma of 0.02
 C8-C5
 1.5 with sigma of 0.02
 C17-N2
 1.47 with sigma of 0.02
 N1-C3
 1.47 with sigma of 0.02
4. Restrained planarity
 C25, C26, C27, C22, C23, C24
 with sigma of 0.1
 C2, C7, C6, C5, C4, C3
 with sigma of 0.1
 C19, C20, C21, C16, C17, C18
 with sigma of 0.1
 C8, C13, C12, C11, C10, C9
 with sigma of 0.1
5. Rigid bond restraints
 All non-hydrogen atoms
 with sigma for 1-2 distances of 0.01 and sigma for 1-3 distances of 0.01
6. Uiso/Uaniso restraints and constraints
Uanis(O11) = Uanis(O12) = Uanis(O8) = Uanis(O7) = Uanis(O9) = Uanis(O10) =
Uanis(O3) = Uanis(O4) = Uanis(O1) = Uanis(O2) = Uanis(O13) = Uanis(O6) =
Uanis(O5) = Uanis(O16) = Uanis(O17) = Uanis(O14) = Uanis(O15) = Uanis(N1) =
Uanis(N2)
Uanis(C28) = Uanis(C15) = Uanis(C14) = Uanis(C1)
Uanis(C25) = Uanis(C26) = Uanis(C27) = Uanis(C22) = Uanis(C23) = Uanis(C24) =
Uanis(C19) = Uanis(C20) = Uanis(C21) = Uanis(C16) = Uanis(C17) = Uanis(C18) =
Uanis(C2) = Uanis(C7) = Uanis(C6) = Uanis(C5) = Uanis(C4) = Uanis(C3) =
Uanis(C8) = Uanis(C13) = Uanis(C12) = Uanis(C11) = Uanis(C10) = Uanis(C9)
7. Others
 Fixed Sof: O16(0.5) H16A(0.5) H16B(0.5) H17A(0.25) H17B(0.25)
8.a Riding coordinates:
 O16(H16A,H16B), O14(H14), O17(H17A,H17B), O13(H13A), O15(H15)
8.b Aromatic/amide H refined with riding coordinates:
 C7(H7), C21(H21), C6(H6), C12(H12), C20(H20), C10(H10), C26(H26), C18(H18),
 C4(H4), C27(H27), C13(H13), C9(H9), C24(H24), C23(H23)
;
_atom_sites_solution_hydrogens     mixed
_atom_sites_solution_primary       dual
_atom_sites_solution_secondary     ?
loop_
  _atom_site_label
  _atom_site_type_symbol
  _atom_site_fract_x
  _atom_site_fract_y
  _atom_site_fract_z
  _atom_site_U_iso_or_equiv
  _atom_site_adp_type
  _atom_site_occupancy
  _atom_site_site_symmetry_order
  _atom_site_calc_flag
  _atom_site_refinement_flags_posn
  _atom_site_refinement_flags_adp
  _atom_site_refinement_flags_occupancy
  _atom_site_disorder_assembly
  _atom_site_disorder_group
 Y1 Y 0.45865(4) 0.53786(4) 1.33862(18) 0.0151(4) Uani 1 1 d . U . . .
 Y3 Y 0.54075(5) 0.95925(5) 0.5255(3) 0.0232(6) Uani 1 2 d S TU P . .
 O6 O 0.5255(5) 0.8953(4) 0.631(2) 0.0487(10) Uani 1 1 d . U . . .
 O7 O 0.5116(5) 0.9324(4) 0.296(2) 0.0487(10) Uani 1 1 d D U . . .
 O5 O 0.4636(5) 0.9007(4) 0.7305(19) 0.0487(10) Uani 1 1 d . U . . .
 O1 O 0.4815(5) 0.5802(4) 1.1373(19) 0.0487(10) Uani 1 1 d D U . . .
 C16 C 0.4968(6) 0.8657(5) 0.241(3) 0.0462(12) Uani 1 1 d D U . . .
 C1 C 0.4957(7) 0.5899(5) 1.005(2) 0.038(2) Uani 1 1 d D U . . .
 O8 O 0.4791(5) 0.9153(4) 0.064(2) 0.0487(10) Uani 1 1 d D U . . .
 C2 C 0.4960(6) 0.6334(5) 0.962(3) 0.0462(12) Uani 1 1 d D U . . .
 O12 O 0.4651(5) 0.6003(4) 0.4553(19) 0.0487(10) Uani 1 1 d D U . . .
 O11 O 0.5266(5) 0.6049(4) 0.558(2) 0.0487(10) Uani 1 1 d D U . . .
 C7 C 0.4638(7) 0.6512(5) 0.883(2) 0.0462(12) Uani 1 1 d D U . . .
 H7 H 0.441333 0.636197 0.860501 0.055 Uiso 1 1 calc R U . . .
 C14 C 0.4929(7) 0.8817(5) 0.711(2) 0.038(2) Uani 1 1 d D U . . .
 C21 C 0.4631(7) 0.8470(5) 0.311(2) 0.0462(12) Uani 1 1 d D U . . .
 H21 H 0.440532 0.861707 0.334792 0.055 Uiso 1 1 calc R U . . .
 C15 C 0.4972(6) 0.9090(5) 0.195(2) 0.038(2) Uani 1 1 d D U . . .
 C6 C 0.4644(7) 0.6917(5) 0.837(3) 0.0462(12) Uani 1 1 d D U . . .
 H6 H 0.442767 0.702879 0.782524 0.055 Uiso 1 1 calc R U . . .
 C12 C 0.4626(7) 0.8194(5) 0.806(2) 0.0462(12) Uani 1 1 d D U . . .
 H12 H 0.439046 0.833519 0.813726 0.055 Uiso 1 1 calc R U . . .
 O3 O 0.5665(5) 0.6060(4) 1.128(2) 0.0487(10) Uani 1 1 d D U . . .
 C20 C 0.4640(7) 0.8066(5) 0.345(2) 0.0462(12) Uani 1 1 d D U . . .
 H20 H 0.442038 0.794600 0.393624 0.055 Uiso 1 1 calc R U . . .
 C11 C 0.4970(6) 0.8384(5) 0.752(3) 0.0462(12) Uani 1 1 d D U . . .
 C3 C 0.5292(6) 0.6576(5) 0.999(3) 0.0462(12) Uani 1 1 d D U . . .
 C25 C 0.4986(6) 0.6598(5) 0.445(2) 0.0462(12) Uani 1 1 d D U . . .
 C28 C 0.4958(6) 0.6158(5) 0.500(2) 0.038(2) Uani 1 1 d D U . . .
 C10 C 0.5320(7) 0.8166(5) 0.725(3) 0.0462(12) Uani 1 1 d D U . . .
 H10 H 0.553935 0.828081 0.673785 0.055 Uiso 1 1 calc R U . . .
 O9 O 0.5578(5) 0.8906(4) 0.032(2) 0.0487(10) Uani 1 1 d D U . . .
 C17 C 0.5282(6) 0.8420(5) 0.200(3) 0.0462(12) Uani 1 1 d D U . . .
 C26 C 0.4659(7) 0.6790(5) 0.375(2) 0.0462(12) Uani 1 1 d D U . . .
 H26 H 0.443173 0.663830 0.360346 0.055 Uiso 1 1 calc R U . . .
 C19 C 0.4971(6) 0.7836(5) 0.306(3) 0.0462(12) Uani 1 1 d D U . . .
 C18 C 0.5307(7) 0.8009(5) 0.237(3) 0.0462(12) Uani 1 1 d D U . . .
 H18 H 0.553536 0.786333 0.216612 0.055 Uiso 1 1 calc R U . . .
 C4 C 0.5304(7) 0.6969(5) 0.945(3) 0.0462(12) Uani 1 1 d D U . . .
 H4 H 0.553648 0.711321 0.956455 0.055 Uiso 1 1 calc R U . . .
 C8 C 0.4985(6) 0.7581(5) 0.831(3) 0.0462(12) Uani 1 1 d D U . . .
 C27 C 0.4636(7) 0.7182(5) 0.325(2) 0.0462(12) Uani 1 1 d D U . . .
 H27 H 0.440528 0.728704 0.279730 0.055 Uiso 1 1 calc R U . . .
 C13 C 0.4635(7) 0.7803(5) 0.847(2) 0.0462(12) Uani 1 1 d D U . . .
 H13 H 0.440611 0.768071 0.885705 0.055 Uiso 1 1 calc R U . . .
 N1 N 0.5639(5) 0.6414(5) 1.100(2) 0.0487(10) Uani 1 1 d D U . . .
 O4 O 0.5923(5) 0.6624(4) 1.145(2) 0.0487(10) Uani 1 1 d D U . . .
 C5 C 0.4976(6) 0.7148(5) 0.874(3) 0.0462(12) Uani 1 1 d D U . . .
 C9 C 0.5324(7) 0.7773(5) 0.776(3) 0.0462(12) Uani 1 1 d D U . . .
 H9 H 0.556192 0.763504 0.774000 0.055 Uiso 1 1 calc R U . . .
 C24 C 0.5304(7) 0.6840(5) 0.461(3) 0.0462(12) Uani 1 1 d D U . . .
 H24 H 0.553023 0.673230 0.509235 0.055 Uiso 1 1 calc R U . . .
 C22 C 0.4981(6) 0.7414(5) 0.345(3) 0.0462(12) Uani 1 1 d D U . . .
 N2 N 0.5618(5) 0.8594(5) 0.108(2) 0.0487(10) Uani 1 1 d D U . . .
 O16 O 0.5957(9) 0.9145(8) 0.440(3) 0.0487(10) Uani 0.5 1 d . U P A -1
 H16A H 0.606884 0.919383 0.346708 0.073 Uiso 0.5 1 d R U P A -1
 H16B H 0.614614 0.911653 0.509488 0.073 Uiso 0.5 1 d R U P A -1
 C23 C 0.5323(7) 0.7239(5) 0.412(3) 0.0462(12) Uani 1 1 d D U . . .
 H23 H 0.555577 0.738341 0.423395 0.055 Uiso 1 1 calc R U . . .
 O2 O 0.5070(5) 0.5673(4) 0.9016(19) 0.0487(10) Uani 1 1 d D U . . .
 O10 O 0.5934(5) 0.8394(4) 0.112(2) 0.0487(10) Uani 1 1 d D U . . .
 Y2 Y 0.46215(5) 0.96215(5) 0.8606(3) 0.0242(6) Uani 1 2 d S TU P A .
 O14 O 0.4685(5) 1.0315(5) 0.819(3) 0.0487(10) Uani 1 2 d S TU P . .
 H14 H 0.453488 1.046510 0.876693 0.073 Uiso 1 2 d R U P A .
 O17 O 0.500000 1.000000 1.080(4) 0.0487(10) Uani 1 4 d S TU P . .
 H17A H 0.514060 0.985940 1.145522 0.073 Uiso 0.5 2 d R U P A .
 H17B H 0.485940 1.014060 1.145522 0.073 Uiso 0.5 2 d R U P . .
 O13 O 0.4706(5) 0.5276(4) 1.641(2) 0.0487(10) Uani 1 1 d . U . . .
 H13A H 0.456771 0.540480 1.712026 0.073 Uiso 1 1 d R U . . .
 O15 O 0.4712(5) 0.9712(5) 0.569(3) 0.0487(10) Uani 1 2 d S TU P A .
 H15 H 0.456849 0.956850 0.505916 0.073 Uiso 1 2 d R U P . .

loop_
  _atom_site_aniso_label
  _atom_site_aniso_U_11
  _atom_site_aniso_U_22
  _atom_site_aniso_U_33
  _atom_site_aniso_U_23
  _atom_site_aniso_U_13
  _atom_site_aniso_U_12
 Y1 0.0166(8) 0.0151(7) 0.0135(7) 0.0035(6) -0.0033(6) -0.0005(7)
 Y3 0.0209(7) 0.0209(7) 0.0277(13) 0.0026(7) -0.0026(7) 0.0103(12)
 O6 0.070(3) 0.037(2) 0.038(2) 0.0069(17) 0.0043(19) 0.0046(18)
 O7 0.070(3) 0.037(2) 0.038(2) 0.0069(17) 0.0043(19) 0.0046(18)
 O5 0.070(3) 0.037(2) 0.038(2) 0.0069(17) 0.0043(19) 0.0046(18)
 O1 0.070(3) 0.037(2) 0.038(2) 0.0069(17) 0.0043(19) 0.0046(18)
 C16 0.071(3) 0.029(2) 0.038(3) 0.0084(19) 0.006(2) 0.005(2)
 C1 0.065(6) 0.030(4) 0.020(5) -0.001(3) 0.009(4) 0.004(4)
 O8 0.070(3) 0.037(2) 0.038(2) 0.0069(17) 0.0043(19) 0.0046(18)
 C2 0.071(3) 0.029(2) 0.038(3) 0.0084(19) 0.006(2) 0.005(2)
 O12 0.070(3) 0.037(2) 0.038(2) 0.0069(17) 0.0043(19) 0.0046(18)
 O11 0.070(3) 0.037(2) 0.038(2) 0.0069(17) 0.0043(19) 0.0046(18)
 C7 0.071(3) 0.029(2) 0.038(3) 0.0084(19) 0.006(2) 0.005(2)
 C14 0.065(6) 0.030(4) 0.020(5) -0.001(3) 0.009(4) 0.004(4)
 C21 0.071(3) 0.029(2) 0.038(3) 0.0084(19) 0.006(2) 0.005(2)
 C15 0.065(6) 0.030(4) 0.020(5) -0.001(3) 0.009(4) 0.004(4)
 C6 0.071(3) 0.029(2) 0.038(3) 0.0084(19) 0.006(2) 0.005(2)
 C12 0.071(3) 0.029(2) 0.038(3) 0.0084(19) 0.006(2) 0.005(2)
 O3 0.070(3) 0.037(2) 0.038(2) 0.0069(17) 0.0043(19) 0.0046(18)
 C20 0.071(3) 0.029(2) 0.038(3) 0.0084(19) 0.006(2) 0.005(2)
 C11 0.071(3) 0.029(2) 0.038(3) 0.0084(19) 0.006(2) 0.005(2)
 C3 0.071(3) 0.029(2) 0.038(3) 0.0084(19) 0.006(2) 0.005(2)
 C25 0.071(3) 0.029(2) 0.038(3) 0.0084(19) 0.006(2) 0.005(2)
 C28 0.065(6) 0.030(4) 0.020(5) -0.001(3) 0.009(4) 0.004(4)
 C10 0.071(3) 0.029(2) 0.038(3) 0.0084(19) 0.006(2) 0.005(2)
 O9 0.070(3) 0.037(2) 0.038(2) 0.0069(17) 0.0043(19) 0.0046(18)
 C17 0.071(3) 0.029(2) 0.038(3) 0.0084(19) 0.006(2) 0.005(2)
 C26 0.071(3) 0.029(2) 0.038(3) 0.0084(19) 0.006(2) 0.005(2)
 C19 0.071(3) 0.029(2) 0.038(3) 0.0084(19) 0.006(2) 0.005(2)
 C18 0.071(3) 0.029(2) 0.038(3) 0.0084(19) 0.006(2) 0.005(2)
 C4 0.071(3) 0.029(2) 0.038(3) 0.0084(19) 0.006(2) 0.005(2)
 C8 0.071(3) 0.029(2) 0.038(3) 0.0084(19) 0.006(2) 0.005(2)
 C27 0.071(3) 0.029(2) 0.038(3) 0.0084(19) 0.006(2) 0.005(2)
 C13 0.071(3) 0.029(2) 0.038(3) 0.0084(19) 0.006(2) 0.005(2)
 N1 0.070(3) 0.037(2) 0.038(2) 0.0069(17) 0.0043(19) 0.0046(18)
 O4 0.070(3) 0.037(2) 0.038(2) 0.0069(17) 0.0043(19) 0.0046(18)
 C5 0.071(3) 0.029(2) 0.038(3) 0.0084(19) 0.006(2) 0.005(2)
 C9 0.071(3) 0.029(2) 0.038(3) 0.0084(19) 0.006(2) 0.005(2)
 C24 0.071(3) 0.029(2) 0.038(3) 0.0084(19) 0.006(2) 0.005(2)
 C22 0.071(3) 0.029(2) 0.038(3) 0.0084(19) 0.006(2) 0.005(2)
 N2 0.070(3) 0.037(2) 0.038(2) 0.0069(17) 0.0043(19) 0.0046(18)
 O16 0.070(3) 0.037(2) 0.038(2) 0.0069(17) 0.0043(19) 0.0046(18)
 C23 0.071(3) 0.029(2) 0.038(3) 0.0084(19) 0.006(2) 0.005(2)
 O2 0.070(3) 0.037(2) 0.038(2) 0.0069(17) 0.0043(19) 0.0046(18)
 O10 0.070(3) 0.037(2) 0.038(2) 0.0069(17) 0.0043(19) 0.0046(18)
 Y2 0.0247(8) 0.0247(8) 0.0232(12) 0.0004(8) 0.0004(8) 0.0098(12)
 O14 0.070(3) 0.037(2) 0.038(2) 0.0069(17) 0.0043(19) 0.0046(18)
 O17 0.070(3) 0.037(2) 0.038(2) 0.0069(17) 0.0043(19) 0.0046(18)
 O13 0.070(3) 0.037(2) 0.038(2) 0.0069(17) 0.0043(19) 0.0046(18)
 O15 0.070(3) 0.037(2) 0.038(2) 0.0069(17) 0.0043(19) 0.0046(18)

_geom_special_details
;
 All esds (except the esd in the dihedral angle between two l.s. planes)
 are estimated using the full covariance matrix.  The cell esds are taken
 into account individually in the estimation of esds in distances, angles
 and torsion angles; correlations between esds in cell parameters are only
 used when they are defined by crystal symmetry.  An approximate (isotropic)
 treatment of cell esds is used for estimating esds involving l.s. planes.
;
loop_
  _geom_bond_atom_site_label_1
  _geom_bond_atom_site_label_2
  _geom_bond_distance
  _geom_bond_site_symmetry_2
  _geom_bond_publ_flag
 Y1 Y1 3.708(2) 3_568 ?
 Y1 Y1 3.790(3) 2_665 ?
 Y1 Y1 3.708(2) 4_658 ?
 Y1 O1 2.280(14) . ?
 Y1 O12 2.315(15) 1_556 ?
 Y1 O11 2.333(15) 4_657 ?
 Y1 O2 2.344(15) 4_657 ?
 Y1 O13 2.353(14) 3_568 ?
 Y1 O13 2.325(16) 4_658 ?
 Y1 O13 2.463(16) . ?
 Y3 Y3 3.896(4) 2_675 ?
 Y3 O6 2.375(15) 7_665 ?
 Y3 O6 2.375(14) . ?
 Y3 O7 2.264(16) 7_665 ?
 Y3 O7 2.264(16) . ?
 Y3 O16 2.49(2) . ?
 Y3 Y2 3.761(3) . ?
 Y3 Y2 3.761(3) 2_675 ?
 Y3 O14 2.37(2) 2_675 ?
 Y3 O15 2.412(13) 2_675 ?
 Y3 O15 2.412(13) . ?
 O6 C14 1.35(3) . ?
 O7 C15 1.224(19) . ?
 O5 C14 1.19(3) . ?
 O5 Y2 2.320(15) . ?
 O1 C1 1.200(18) . ?
 C16 C21 1.42(2) . ?
 C16 C15 1.51(2) . ?
 C16 C17 1.37(2) . ?
 C1 C2 1.51(2) . ?
 C1 O2 1.186(18) . ?
 O8 C15 1.228(18) . ?
 O8 Y2 2.333(15) 1_554 ?
 C2 C7 1.39(2) . ?
 C2 C3 1.42(2) . ?
 O12 C28 1.217(19) . ?
 O11 C28 1.195(18) . ?
 C7 H7 0.9300 . ?
 C7 C6 1.417(19) . ?
 C14 C11 1.51(2) . ?
 C21 H21 0.9300 . ?
 C21 C20 1.394(19) . ?
 C6 H6 0.9300 . ?
 C6 C5 1.40(2) . ?
 C12 H12 0.9300 . ?
 C12 C11 1.39(2) . ?
 C12 C13 1.363(19) . ?
 O3 N1 1.222(17) . ?
 C20 H20 0.9300 . ?
 C20 C19 1.40(2) . ?
 C11 C10 1.41(2) . ?
 C3 C4 1.398(19) . ?
 C3 N1 1.52(2) . ?
 C25 C28 1.55(2) . ?
 C25 C26 1.40(2) . ?
 C25 C24 1.36(2) . ?
 C10 H10 0.9300 . ?
 C10 C9 1.389(19) . ?
 O9 N2 1.223(17) . ?
 C17 C18 1.422(19) . ?
 C17 N2 1.47(2) . ?
 C26 H26 0.9300 . ?
 C26 C27 1.384(19) . ?
 C19 C18 1.39(2) . ?
 C19 C22 1.46(2) . ?
 C18 H18 0.9300 . ?
 C4 H4 0.9300 . ?
 C4 C5 1.38(2) . ?
 C8 C13 1.41(2) . ?
 C8 C5 1.50(2) . ?
 C8 C9 1.39(2) . ?
 C27 H27 0.9300 . ?
 C27 C22 1.41(2) . ?
 C13 H13 0.9300 . ?
 N1 O4 1.247(18) . ?
 C9 H9 0.9300 . ?
 C24 H24 0.9300 . ?
 C24 C23 1.405(19) . ?
 C22 C23 1.40(2) . ?
 N2 O10 1.262(18) . ?
 O16 H16A 0.8498 . ?
 O16 H16B 0.8498 . ?
 C23 H23 0.9300 . ?
 Y2 Y2 3.618(5) 2_675 ?
 Y2 O14 2.378(14) 2_675 ?
 Y2 O14 2.378(14) . ?
 Y2 O17 2.51(2) . ?
 Y2 O15 2.35(2) . ?
 O14 H14 0.8498 . ?
 O17 H17A 0.8499 . ?
 O17 H17B 0.8499 . ?
 O13 H13A 0.8506 . ?
 O15 H15 0.8501 . ?

loop_
  _geom_angle_atom_site_label_1
  _geom_angle_atom_site_label_2
  _geom_angle_atom_site_label_3
  _geom_angle
  _geom_angle_site_symmetry_1
  _geom_angle_site_symmetry_3
  _geom_angle_publ_flag
 Y1 Y1 Y1 59.26(2) 4_658 2_665 ?
 Y1 Y1 Y1 61.47(5) 3_568 4_658 ?
 Y1 Y1 Y1 59.27(2) 3_568 2_665 ?
 O1 Y1 Y1 100.0(4) . 2_665 ?
 O1 Y1 Y1 157.9(4) . 4_658 ?
 O1 Y1 Y1 102.7(4) . 3_568 ?
 O1 Y1 O12 71.1(6) . 1_556 ?
 O1 Y1 O11 131.5(6) . 4_657 ?
 O1 Y1 O2 80.5(6) . 4_657 ?
 O1 Y1 O13 135.8(6) . . ?
 O1 Y1 O13 126.4(5) . 4_658 ?
 O1 Y1 O13 77.8(6) . 3_568 ?
 O12 Y1 Y1 68.1(4) 1_556 3_568 ?
 O12 Y1 Y1 123.1(4) 1_556 2_665 ?
 O12 Y1 Y1 112.2(4) 1_556 4_658 ?
 O12 Y1 O11 95.4(6) 1_556 4_657 ?
 O12 Y1 O2 140.0(6) 1_556 4_657 ?
 O12 Y1 O13 89.5(6) 1_556 3_568 ?
 O12 Y1 O13 147.7(6) 1_556 4_658 ?
 O12 Y1 O13 73.9(5) 1_556 . ?
 O11 Y1 Y1 70.6(4) 4_657 4_658 ?
 O11 Y1 Y1 124.7(4) 4_657 2_665 ?
 O11 Y1 Y1 115.2(4) 4_657 3_568 ?
 O11 Y1 O2 82.5(5) 4_657 4_657 ?
 O11 Y1 O13 150.3(6) 4_657 3_568 ?
 O11 Y1 O13 77.5(5) 4_657 . ?
 O2 Y1 Y1 147.9(4) 4_657 3_568 ?
 O2 Y1 Y1 88.6(4) 4_657 2_665 ?
 O2 Y1 Y1 104.7(4) 4_657 4_658 ?
 O2 Y1 O13 142.5(5) 4_657 . ?
 O2 Y1 O13 111.8(5) 4_657 3_568 ?
 O13 Y1 Y1 80.8(4) 4_658 3_568 ?
 O13 Y1 Y1 40.6(4) 4_658 4_658 ?
 O13 Y1 Y1 77.5(4) . 2_665 ?
 O13 Y1 Y1 80.4(4) 3_568 4_658 ?
 O13 Y1 Y1 37.9(4) . 3_568 ?
 O13 Y1 Y1 38.6(3) . 4_658 ?
 O13 Y1 Y1 36.1(4) 4_658 2_665 ?
 O13 Y1 Y1 35.6(4) 3_568 2_665 ?
 O13 Y1 Y1 40.7(4) 3_568 3_568 ?
 O13 Y1 O11 90.0(5) 4_658 4_657 ?
 O13 Y1 O2 72.3(6) 4_658 4_657 ?
 O13 Y1 O13 76.3(6) 4_658 . ?
 O13 Y1 O13 71.2(6) 4_658 3_568 ?
 O13 Y1 O13 75.8(6) 3_568 . ?
 O6 Y3 Y3 119.3(4) 7_665 2_675 ?
 O6 Y3 Y3 119.3(4) . 2_675 ?
 O6 Y3 O6 105.8(8) 7_665 . ?
 O6 Y3 O16 72.8(8) . . ?
 O6 Y3 O16 63.2(8) 7_665 . ?
 O6 Y3 Y2 112.9(4) . 2_675 ?
 O6 Y3 Y2 67.8(4) 7_665 2_675 ?
 O6 Y3 Y2 67.8(4) . . ?
 O6 Y3 Y2 112.9(4) 7_665 . ?
 O6 Y3 O15 83.6(6) . . ?
 O6 Y3 O15 143.2(7) . 2_675 ?
 O6 Y3 O15 143.2(7) 7_665 . ?
 O6 Y3 O15 83.6(6) 7_665 2_675 ?
 O7 Y3 Y3 88.6(4) . 2_675 ?
 O7 Y3 Y3 88.6(4) 7_665 2_675 ?
 O7 Y3 O6 79.8(6) . . ?
 O7 Y3 O6 140.1(6) 7_665 . ?
 O7 Y3 O6 79.8(6) 7_665 7_665 ?
 O7 Y3 O6 140.1(6) . 7_665 ?
 O7 Y3 O7 72.5(8) . 7_665 ?
 O7 Y3 O16 82.0(8) . . ?
 O7 Y3 O16 75.3(7) 7_665 . ?
 O7 Y3 Y2 105.9(4) . . ?
 O7 Y3 Y2 147.4(4) . 2_675 ?
 O7 Y3 Y2 105.9(4) 7_665 2_675 ?
 O7 Y3 Y2 147.4(4) 7_665 . ?
 O7 Y3 O14 142.0(4) 7_665 2_675 ?
 O7 Y3 O14 142.0(4) . 2_675 ?
 O7 Y3 O15 76.1(7) . . ?
 O7 Y3 O15 76.1(7) 7_665 2_675 ?
 O7 Y3 O15 115.8(6) . 2_675 ?
 O7 Y3 O15 115.8(6) 7_665 . ?
 O16 Y3 Y3 163.2(6) . 2_675 ?
 O16 Y3 Y2 129.9(7) . 2_675 ?
 O16 Y3 Y2 137.3(6) . . ?
 Y2 Y3 Y3 58.81(4) 2_675 2_675 ?
 Y2 Y3 Y3 58.81(4) . 2_675 ?
 Y2 Y3 Y2 57.50(8) 2_675 . ?
 O14 Y3 Y3 79.3(5) 2_675 2_675 ?
 O14 Y3 O6 75.3(5) 2_675 7_665 ?
 O14 Y3 O6 75.3(5) 2_675 . ?
 O14 Y3 O16 116.4(8) 2_675 . ?
 O14 Y3 Y2 37.7(3) 2_675 . ?
 O14 Y3 Y2 37.7(3) 2_675 2_675 ?
 O14 Y3 O15 73.0(7) 2_675 . ?
 O14 Y3 O15 73.0(7) 2_675 2_675 ?
 O15 Y3 Y3 36.1(4) . 2_675 ?
 O15 Y3 Y3 36.1(4) 2_675 2_675 ?
 O15 Y3 O16 139.2(9) 2_675 . ?
 O15 Y3 O16 150.3(9) . . ?
 O15 Y3 Y2 75.8(5) . 2_675 ?
 O15 Y3 Y2 37.3(5) 2_675 2_675 ?
 O15 Y3 Y2 75.8(5) 2_675 . ?
 O15 Y3 Y2 37.3(5) . . ?
 O15 Y3 O15 69.7(9) 2_675 . ?
 C14 O6 Y3 130.7(13) . . ?
 C15 O7 Y3 163.3(14) . . ?
 C14 O5 Y2 124.1(16) . . ?
 C1 O1 Y1 157.0(14) . . ?
 C21 C16 C15 122.4(17) . . ?
 C17 C16 C21 117.0(17) . . ?
 C17 C16 C15 120.4(17) . . ?
 O1 C1 C2 118.0(16) . . ?
 O2 C1 O1 124.0(18) . . ?
 O2 C1 C2 117.8(16) . . ?
 C15 O8 Y2 145.9(14) . 1_554 ?
 C7 C2 C1 121.2(18) . . ?
 C7 C2 C3 117.6(17) . . ?
 C3 C2 C1 121.2(17) . . ?
 C28 O12 Y1 126.2(14) . 1_554 ?
 C28 O11 Y1 124.1(13) . 3_567 ?
 C2 C7 H7 119.3 . . ?
 C2 C7 C6 121(2) . . ?
 C6 C7 H7 119.3 . . ?
 O6 C14 C11 111.0(17) . . ?
 O5 C14 O6 123.7(18) . . ?
 O5 C14 C11 125(2) . . ?
 C16 C21 H21 120.1 . . ?
 C20 C21 C16 120(2) . . ?
 C20 C21 H21 120.1 . . ?
 O7 C15 C16 118.3(17) . . ?
 O7 C15 O8 129.8(18) . . ?
 O8 C15 C16 111.6(17) . . ?
 C7 C6 H6 120.1 . . ?
 C5 C6 C7 120(2) . . ?
 C5 C6 H6 120.1 . . ?
 C11 C12 H12 120.0 . . ?
 C13 C12 H12 120.0 . . ?
 C13 C12 C11 120(2) . . ?
 C21 C20 H20 119.4 . . ?
 C21 C20 C19 121(2) . . ?
 C19 C20 H20 119.4 . . ?
 C12 C11 C14 115.9(17) . . ?
 C12 C11 C10 120.5(18) . . ?
 C10 C11 C14 123.4(18) . . ?
 C2 C3 N1 120.8(15) . . ?
 C4 C3 C2 120.3(18) . . ?
 C4 C3 N1 118.9(17) . . ?
 C26 C25 C28 120.5(17) . . ?
 C24 C25 C28 126.9(17) . . ?
 C24 C25 C26 112.6(18) . . ?
 O12 C28 C25 112.6(16) . . ?
 O11 C28 O12 136.2(19) . . ?
 O11 C28 C25 110.4(16) . . ?
 C11 C10 H10 121.2 . . ?
 C9 C10 C11 118(2) . . ?
 C9 C10 H10 121.2 . . ?
 C16 C17 C18 124.7(18) . . ?
 C16 C17 N2 118.7(15) . . ?
 C18 C17 N2 116.6(16) . . ?
 C25 C26 H26 116.5 . . ?
 C27 C26 C25 127(2) . . ?
 C27 C26 H26 116.5 . . ?
 C20 C19 C22 120.9(17) . . ?
 C18 C19 C20 120.6(18) . . ?
 C18 C19 C22 118.4(17) . . ?
 C17 C18 H18 121.8 . . ?
 C19 C18 C17 116.3(18) . . ?
 C19 C18 H18 121.8 . . ?
 C3 C4 H4 119.4 . . ?
 C5 C4 C3 121(2) . . ?
 C5 C4 H4 119.4 . . ?
 C13 C8 C5 119.0(17) . . ?
 C9 C8 C13 118.1(18) . . ?
 C9 C8 C5 122.9(17) . . ?
 C26 C27 H27 121.5 . . ?
 C26 C27 C22 117(2) . . ?
 C22 C27 H27 121.5 . . ?
 C12 C13 C8 121(2) . . ?
 C12 C13 H13 119.4 . . ?
 C8 C13 H13 119.4 . . ?
 O3 N1 C3 120.4(17) . . ?
 O3 N1 O4 116.7(17) . . ?
 O4 N1 C3 122.6(15) . . ?
 C6 C5 C8 120.8(17) . . ?
 C4 C5 C6 119.0(18) . . ?
 C4 C5 C8 120.1(17) . . ?
 C10 C9 C8 122(2) . . ?
 C10 C9 H9 118.9 . . ?
 C8 C9 H9 118.9 . . ?
 C25 C24 H24 116.9 . . ?
 C25 C24 C23 126(2) . . ?
 C23 C24 H24 116.9 . . ?
 C27 C22 C19 119.9(17) . . ?
 C23 C22 C19 120.7(17) . . ?
 C23 C22 C27 119.3(18) . . ?
 O9 N2 C17 120.3(17) . . ?
 O9 N2 O10 124.4(18) . . ?
 O10 N2 C17 115.2(15) . . ?
 Y3 O16 H16A 116.9 . . ?
 Y3 O16 H16B 117.0 . . ?
 H16A O16 H16B 104.5 . . ?
 C24 C23 H23 121.0 . . ?
 C22 C23 C24 118(2) . . ?
 C22 C23 H23 121.0 . . ?
 C1 O2 Y1 161.6(14) . 3_567 ?
 Y3 Y2 Y3 62.38(7) 2_675 . ?
 O5 Y2 Y3 108.5(4) . 2_675 ?
 O5 Y2 Y3 108.5(4) 8_455 . ?
 O5 Y2 Y3 69.3(4) 8_455 2_675 ?
 O5 Y2 Y3 69.3(4) . . ?
 O5 Y2 O5 80.8(9) 8_455 . ?
 O5 Y2 O8 122.9(6) . 8_456 ?
 O5 Y2 O8 72.2(5) . 1_556 ?
 O5 Y2 O8 122.9(6) 8_455 1_556 ?
 O5 Y2 O8 72.3(5) 8_455 8_456 ?
 O5 Y2 Y2 128.2(4) 8_455 2_675 ?
 O5 Y2 Y2 128.2(4) . 2_675 ?
 O5 Y2 O14 145.0(7) 8_455 2_675 ?
 O5 Y2 O14 145.0(7) . . ?
 O5 Y2 O14 89.8(6) . 2_675 ?
 O5 Y2 O14 89.8(6) 8_455 . ?
 O5 Y2 O17 138.9(4) 8_455 . ?
 O5 Y2 O17 138.9(4) . . ?
 O5 Y2 O15 71.1(6) . . ?
 O5 Y2 O15 71.1(6) 8_455 . ?
 O8 Y2 Y3 107.4(4) 8_456 2_675 ?
 O8 Y2 Y3 107.4(4) 1_556 . ?
 O8 Y2 Y3 167.3(4) 1_556 2_675 ?
 O8 Y2 Y3 167.3(4) 8_456 . ?
 O8 Y2 O8 81.6(8) 8_456 1_556 ?
 O8 Y2 Y2 107.8(4) 8_456 2_675 ?
 O8 Y2 Y2 107.8(4) 1_556 2_675 ?
 O8 Y2 O14 138.0(6) 1_556 . ?
 O8 Y2 O14 85.1(7) 1_556 2_675 ?
 O8 Y2 O14 85.1(6) 8_456 . ?
 O8 Y2 O14 138.0(6) 8_456 2_675 ?
 O8 Y2 O17 75.0(6) 8_456 . ?
 O8 Y2 O17 75.0(6) 1_556 . ?
 O8 Y2 O15 137.4(4) 1_556 . ?
 O8 Y2 O15 137.4(4) 8_456 . ?
 Y2 Y2 Y3 61.25(4) 2_675 2_675 ?
 Y2 Y2 Y3 61.25(4) 2_675 . ?
 O14 Y2 Y3 82.2(5) . . ?
 O14 Y2 Y3 82.2(5) 2_675 2_675 ?
 O14 Y2 Y3 37.6(5) 2_675 . ?
 O14 Y2 Y3 37.6(5) . 2_675 ?
 O14 Y2 Y2 40.5(4) . 2_675 ?
 O14 Y2 Y2 40.5(4) 2_675 2_675 ?
 O14 Y2 O14 78.7(9) 2_675 . ?
 O14 Y2 O17 63.2(6) 2_675 . ?
 O14 Y2 O17 63.2(6) . . ?
 O17 Y2 Y3 98.3(5) . . ?
 O17 Y2 Y3 98.3(4) . 2_675 ?
 O17 Y2 Y2 43.9(5) . 2_675 ?
 O15 Y2 Y3 38.4(3) . 2_675 ?
 O15 Y2 Y3 38.4(3) . . ?
 O15 Y2 Y2 79.4(6) . 2_675 ?
 O15 Y2 O14 74.0(7) . 2_675 ?
 O15 Y2 O14 74.0(7) . . ?
 O15 Y2 O17 123.4(8) . . ?
 Y3 O14 Y2 104.7(7) 2_675 2_675 ?
 Y3 O14 Y2 104.7(7) 2_675 . ?
 Y3 O14 H14 112.0 2_675 . ?
 Y2 O14 Y2 99.1(8) 2_675 . ?
 Y2 O14 H14 117.3 . . ?
 Y2 O14 H14 117.3 2_675 . ?
 Y2 O17 Y2 92.2(10) 2_675 . ?
 Y2 O17 H17A 115.1 . . ?
 Y2 O17 H17A 115.1 2_675 . ?
 Y2 O17 H17B 115.1 2_675 . ?
 Y2 O17 H17B 115.1 . . ?
 H17A O17 H17B 104.5 . . ?
 Y1 O13 Y1 108.2(6) 3_568 4_658 ?
 Y1 O13 Y1 101.5(6) 3_568 . ?
 Y1 O13 Y1 100.7(6) 4_658 . ?
 Y1 O13 H13A 113.0 3_568 . ?
 Y1 O13 H13A 113.3 4_658 . ?
 Y1 O13 H13A 118.7 . . ?
 Y3 O15 Y3 107.7(8) 2_675 . ?
 Y3 O15 H15 112.0 2_675 . ?
 Y3 O15 H15 112.0 . . ?
 Y2 O15 Y3 104.3(7) . 2_675 ?
 Y2 O15 Y3 104.3(7) . . ?
 Y2 O15 H15 115.9 . . ?

loop_
  _geom_hbond_atom_site_label_D
  _geom_hbond_atom_site_label_H
  _geom_hbond_atom_site_label_A
  _geom_hbond_distance_DH
  _geom_hbond_distance_HA
  _geom_hbond_distance_DA
  _geom_hbond_angle_DHA
  _geom_hbond_site_symmetry_A
  _geom_hbond_publ_flag
 O17 H17A O7 0.85 2.17 2.88(2) 141.4 1_556 yes
 O17 H17A O7 0.85 2.17 2.88(2) 141.4 7_666 yes
 O17 H17B O7 0.85 2.17 2.88(2) 141.4 8_456 yes
 O17 H17B O7 0.85 2.17 2.88(2) 141.4 2_676 yes

loop_
  _geom_torsion_atom_site_label_1
  _geom_torsion_atom_site_label_2
  _geom_torsion_atom_site_label_3
  _geom_torsion_atom_site_label_4
  _geom_torsion
  _geom_torsion_site_symmetry_1
  _geom_torsion_site_symmetry_2
  _geom_torsion_site_symmetry_3
  _geom_torsion_site_symmetry_4
  _geom_torsion_publ_flag
 Y1 O1 C1 C2 172(3) . . . . ?
 Y1 O1 C1 O2 -3(6) . . . . ?
 Y1 O12 C28 O11 -32(4) 1_554 . . . ?
 Y1 O12 C28 C25 136.3(14) 1_554 . . . ?
 Y1 O11 C28 O12 -12(4) 3_567 . . . ?
 Y1 O11 C28 C25 179.4(11) 3_567 . . . ?
 Y3 O6 C14 O5 6(3) . . . . ?
 Y3 O6 C14 C11 179.6(14) . . . . ?
 Y3 O7 C15 C16 -1(7) . . . . ?
 Y3 O7 C15 O8 172(4) . . . . ?
 O6 C14 C11 C12 -168.5(18) . . . . ?
 O6 C14 C11 C10 6(3) . . . . ?
 O5 C14 C11 C12 5(3) . . . . ?
 O5 C14 C11 C10 179(2) . . . . ?
 O1 C1 C2 C7 -87(3) . . . . ?
 O1 C1 C2 C3 93(3) . . . . ?
 O1 C1 O2 Y1 -169(4) . . . 3_567 ?
 C16 C21 C20 C19 -2(2) . . . . ?
 C16 C17 C18 C19 6(3) . . . . ?
 C16 C17 N2 O9 -19(3) . . . . ?
 C16 C17 N2 O10 163(2) . . . . ?
 C1 C2 C7 C6 -177.9(18) . . . . ?
 C1 C2 C3 C4 174.3(19) . . . . ?
 C1 C2 C3 N1 -6(3) . . . . ?
 C2 C1 O2 Y1 16(7) . . . 3_567 ?
 C2 C7 C6 C5 -1(2) . . . . ?
 C2 C3 C4 C5 9(3) . . . . ?
 C2 C3 N1 O3 11(3) . . . . ?
 C2 C3 N1 O4 -175(2) . . . . ?
 C7 C2 C3 C4 -6(3) . . . . ?
 C7 C2 C3 N1 174.1(17) . . . . ?
 C7 C6 C5 C4 4(3) . . . . ?
 C7 C6 C5 C8 -178.0(17) . . . . ?
 C14 C11 C10 C9 177(2) . . . . ?
 C21 C16 C15 O7 97(3) . . . . ?
 C21 C16 C15 O8 -76(3) . . . . ?
 C21 C16 C17 C18 -6(4) . . . . ?
 C21 C16 C17 N2 172.6(19) . . . . ?
 C21 C20 C19 C18 2(2) . . . . ?
 C21 C20 C19 C22 178(2) . . . . ?
 C15 C16 C21 C20 177.5(17) . . . . ?
 C15 C16 C17 C18 -180(2) . . . . ?
 C15 C16 C17 N2 -2(3) . . . . ?
 C12 C11 C10 C9 -9(3) . . . . ?
 C20 C19 C18 C17 -4(3) . . . . ?
 C20 C19 C22 C27 38(3) . . . . ?
 C20 C19 C22 C23 -138(2) . . . . ?
 C11 C12 C13 C8 -2(2) . . . . ?
 C11 C10 C9 C8 9(3) . . . . ?
 C3 C2 C7 C6 2(2) . . . . ?
 C3 C4 C5 C6 -8(3) . . . . ?
 C3 C4 C5 C8 174(2) . . . . ?
 C25 C26 C27 C22 0(2) . . . . ?
 C25 C24 C23 C22 2(3) . . . . ?
 C28 C25 C26 C27 178.0(18) . . . . ?
 C28 C25 C24 C23 -179(2) . . . . ?
 C17 C16 C21 C20 3(3) . . . . ?
 C17 C16 C15 O7 -89(3) . . . . ?
 C17 C16 C15 O8 98(3) . . . . ?
 C26 C25 C28 O12 9(3) . . . . ?
 C26 C25 C28 O11 -179.6(17) . . . . ?
 C26 C25 C24 C23 -1(3) . . . . ?
 C26 C27 C22 C19 -175.8(18) . . . . ?
 C26 C27 C22 C23 1(3) . . . . ?
 C19 C22 C23 C24 174(2) . . . . ?
 C18 C17 N2 O9 160(2) . . . . ?
 C18 C17 N2 O10 -19(3) . . . . ?
 C18 C19 C22 C27 -145(2) . . . . ?
 C18 C19 C22 C23 38(3) . . . . ?
 C4 C3 N1 O3 -170(2) . . . . ?
 C4 C3 N1 O4 5(3) . . . . ?
 C27 C22 C23 C24 -2(3) . . . . ?
 C13 C12 C11 C14 -179.7(17) . . . . ?
 C13 C12 C11 C10 6(3) . . . . ?
 C13 C8 C5 C6 36(3) . . . . ?
 C13 C8 C5 C4 -146(2) . . . . ?
 C13 C8 C9 C10 -5(3) . . . . ?
 N1 C3 C4 C5 -171(2) . . . . ?
 C5 C8 C13 C12 -178(2) . . . . ?
 C5 C8 C9 C10 175(2) . . . . ?
 C9 C8 C13 C12 1(2) . . . . ?
 C9 C8 C5 C6 -144(2) . . . . ?
 C9 C8 C5 C4 34(3) . . . . ?
 C24 C25 C28 O12 -173(2) . . . . ?
 C24 C25 C28 O11 -2(3) . . . . ?
 C24 C25 C26 C27 0(2) . . . . ?
 C22 C19 C18 C17 180(2) . . . . ?
 N2 C17 C18 C19 -172.5(19) . . . . ?
 O2 C1 C2 C7 89(3) . . . . ?
 O2 C1 C2 C3 -91(3) . . . . ?
 Y2 O5 C14 O6 -56(3) . . . . ?
 Y2 O5 C14 C11 131.9(19) . . . . ?
 Y2 O8 C15 O7 13(5) 1_554 . . . ?
 Y2 O8 C15 C16 -173.7(18) 1_554 . . . ?

_shelx_res_file
;
TITL 190610c_a.res in P-42(1)m
    190610c_sq.res
    created by SHELXL-2018/3 at 22:31:22 on 14-Jan-2021
REM Old TITL 190610C in P4/mmm #123
REM SHELXT solution in P-42(1)m
REM R1 0.190, Rweak 0.053, Alpha 0.098, Orientation as input
REM Flack x = 0.460 ( 0.018 ) from Parsons' quotients
REM Formula found by SHELXT: C174 N83 O22 I8
CELL 0.71073 33.79932 33.79932 7.939778 90 90 90
ZERR 2 0.000968 0.000968 0.000507 0 0 0
LATT -1
SYMM -X,-Y,+Z
SYMM +Y,-X,-Z
SYMM -Y,+X,-Z
SYMM 0.5-X,0.5+Y,-Z
SYMM 0.5+X,0.5-Y,-Z
SYMM 0.5-Y,0.5-X,+Z
SYMM 0.5+Y,0.5+X,+Z
SFAC C H N O Y
UNIT 224 140 16 118 16
EQIV $1 +X,+Y,1+Z
EQIV $2 1-X,2-Y,1+Z
EQIV $3 1.5-Y,1.5-X,1+Z
EQIV $4 -0.5+Y,0.5+X,1+Z
DELU
DFIX 1.23 O9 N2
EADP O11 O12 O8 O7 O9 O10 O3 O4 O1 O2 O13 O6 O5 O16 O17 O14 O15 N1 N2
DFIX 1.23 N2 O10
DFIX 1.4 C4 C3
DFIX 1.2 N1 O3
DFIX 1.4 C21 C16
DFIX 1.2 N1 O4
FLAT C25 C26 C27 C22 C23 C24
DFIX 1.2 O12 C28
DFIX 1.4 C2 C7
DFIX 1.2 C28 O11
DFIX 1.4 C12 C11
DFIX 1.2 O8 C15
DFIX 1.4 C19 C20
DFIX 1.2 C15 O7
DFIX 1.4 C17 C18
DFIX 1.2 O2 C1
DFIX 1.4 C6 C5
DFIX 1.2 C1 O1
DFIX 1.4 C8 C13
DFIX 1.4 C10 C9
FLAT C2 C7 C6 C5 C4 C3
DFIX 1.53 C25 C28
DFIX 1.4 C20 C21
DFIX 1.53 C2 C1
DFIX 1.4 C16 C17
DFIX 1.53 C16 C15
DFIX 1.4 C18 C19
DFIX 1.53 C14 C11
DFIX 1.4 C7 C6
DFIX 1.4 C25 C26
DFIX 1.4 C5 C4
DFIX 1.4 C26 C27
DFIX 1.4 C3 C2
DFIX 1.4 C27 C22
DFIX 1.4 C13 C12
DFIX 1.4 C22 C23
DFIX 1.4 C11 C10
DFIX 1.4 C23 C24
DFIX 1.4 C9 C8
DFIX 1.4 C24 C25
FLAT C19 C20 C21 C16 C17 C18
DFIX 1.5 C19 C22
FLAT C8 C13 C12 C11 C10 C9
DFIX 1.5 C8 C5
EADP C28 C15 C14 C1
EADP C25 C26 C27 C22 C23 C24 C19 C20 C21 C16 C17 C18 C2 C7 C6 C5 C4 C3 C8 =
 C13 C12 C11 C10 C9
DFIX 1.47 C17 N2
DFIX 1.47 N1 C3

L.S. 20 0 236
PLAN  24
SIZE 0.25 0.2 0.15
TEMP 25
CONF
HTAB O17 O7_$1
HTAB O17 O7_$2
HTAB O17 O7_$3
HTAB O17 O7_$4
BOND $H
MORE -1
ABIN
fmap 2 53
acta
TWIN -1 0 0 0 -1 0 0 0 -1 2
OMIT -3 50.2
REM <olex2.extras>
REM <HklSrc "%.\\190610c_sq.hkl">
REM </olex2.extras>

WGHT    0.194900   83.224190
BASF   0.49452
FVAR       0.17294
Y1    5    0.458645    0.537860    1.338616    11.00000    0.01656    0.01513 =
         0.01346    0.00347   -0.00335   -0.00053
Y3    5    0.540753    0.959247    0.525489    10.50000    0.02094    0.02094 =
         0.02772    0.00257   -0.00257    0.01026
O6    4    0.525471    0.895266    0.630672    11.00000    0.07049    0.03738 =
         0.03819    0.00689    0.00431    0.00460
O7    4    0.511620    0.932359    0.295718    11.00000    0.07049    0.03738 =
         0.03819    0.00689    0.00431    0.00460
O5    4    0.463634    0.900701    0.730534    11.00000    0.07049    0.03738 =
         0.03819    0.00689    0.00431    0.00460
O1    4    0.481499    0.580212    1.137320    11.00000    0.07049    0.03738 =
         0.03819    0.00689    0.00431    0.00460
C16   1    0.496775    0.865734    0.240650    11.00000    0.07101    0.02950 =
         0.03798    0.00840    0.00593    0.00515
C1    1    0.495655    0.589930    1.005048    11.00000    0.06494    0.02983 =
         0.02045   -0.00070    0.00855    0.00431
O8    4    0.479097    0.915302    0.063960    11.00000    0.07049    0.03738 =
         0.03819    0.00689    0.00431    0.00460
C2    1    0.495968    0.633381    0.961545    11.00000    0.07101    0.02950 =
         0.03798    0.00840    0.00593    0.00515
O12   4    0.465053    0.600286    0.455341    11.00000    0.07049    0.03738 =
         0.03819    0.00689    0.00431    0.00460
O11   4    0.526578    0.604947    0.557642    11.00000    0.07049    0.03738 =
         0.03819    0.00689    0.00431    0.00460
C7    1    0.463776    0.651199    0.883172    11.00000    0.07101    0.02950 =
         0.03798    0.00840    0.00593    0.00515
AFIX  43
H7    2    0.441333    0.636197    0.860501    11.00000   -1.20000
AFIX   0
C14   1    0.492915    0.881652    0.710634    11.00000    0.06494    0.02983 =
         0.02045   -0.00070    0.00855    0.00431
C21   1    0.463127    0.847031    0.311015    11.00000    0.07101    0.02950 =
         0.03798    0.00840    0.00593    0.00515
AFIX  43
H21   2    0.440532    0.861707    0.334792    11.00000   -1.20000
AFIX   0
C15   1    0.497226    0.908983    0.195193    11.00000    0.06494    0.02983 =
         0.02045   -0.00070    0.00855    0.00431
C6    1    0.464393    0.691690    0.837076    11.00000    0.07101    0.02950 =
         0.03798    0.00840    0.00593    0.00515
AFIX  43
H6    2    0.442767    0.702879    0.782524    11.00000   -1.20000
AFIX   0
C12   1    0.462610    0.819434    0.805822    11.00000    0.07101    0.02950 =
         0.03798    0.00840    0.00593    0.00515
AFIX  43
H12   2    0.439046    0.833519    0.813726    11.00000   -1.20000
AFIX   0
O3    4    0.566491    0.605956    1.128348    11.00000    0.07049    0.03738 =
         0.03819    0.00689    0.00431    0.00460
C20   1    0.463973    0.806558    0.344536    11.00000    0.07101    0.02950 =
         0.03798    0.00840    0.00593    0.00515
AFIX  43
H20   2    0.442038    0.794600    0.393624    11.00000   -1.20000
AFIX   0
C11   1    0.497002    0.838358    0.752005    11.00000    0.07101    0.02950 =
         0.03798    0.00840    0.00593    0.00515
C3    1    0.529192    0.657589    0.999177    11.00000    0.07101    0.02950 =
         0.03798    0.00840    0.00593    0.00515
C25   1    0.498608    0.659799    0.445081    11.00000    0.07101    0.02950 =
         0.03798    0.00840    0.00593    0.00515
C28   1    0.495769    0.615848    0.500111    11.00000    0.06494    0.02983 =
         0.02045   -0.00070    0.00855    0.00431
C10   1    0.531969    0.816591    0.724614    11.00000    0.07101    0.02950 =
         0.03798    0.00840    0.00593    0.00515
AFIX  43
H10   2    0.553935    0.828081    0.673785    11.00000   -1.20000
AFIX   0
O9    4    0.557788    0.890552    0.031751    11.00000    0.07049    0.03738 =
         0.03819    0.00689    0.00431    0.00460
C17   1    0.528228    0.841965    0.200342    11.00000    0.07101    0.02950 =
         0.03798    0.00840    0.00593    0.00515
C26   1    0.465873    0.679001    0.374906    11.00000    0.07101    0.02950 =
         0.03798    0.00840    0.00593    0.00515
AFIX  43
H26   2    0.443173    0.663830    0.360346    11.00000   -1.20000
AFIX   0
C19   1    0.497080    0.783636    0.305891    11.00000    0.07101    0.02950 =
         0.03798    0.00840    0.00593    0.00515
C18   1    0.530679    0.800860    0.237290    11.00000    0.07101    0.02950 =
         0.03798    0.00840    0.00593    0.00515
AFIX  43
H18   2    0.553536    0.786333    0.216612    11.00000   -1.20000
AFIX   0
C4    1    0.530366    0.696918    0.944719    11.00000    0.07101    0.02950 =
         0.03798    0.00840    0.00593    0.00515
AFIX  43
H4    2    0.553648    0.711321    0.956455    11.00000   -1.20000
AFIX   0
C8    1    0.498480    0.758073    0.831472    11.00000    0.07101    0.02950 =
         0.03798    0.00840    0.00593    0.00515
C27   1    0.463632    0.718159    0.324796    11.00000    0.07101    0.02950 =
         0.03798    0.00840    0.00593    0.00515
AFIX  43
H27   2    0.440528    0.728704    0.279730    11.00000   -1.20000
AFIX   0
C13   1    0.463516    0.780288    0.846863    11.00000    0.07101    0.02950 =
         0.03798    0.00840    0.00593    0.00515
AFIX  43
H13   2    0.440611    0.768071    0.885705    11.00000   -1.20000
AFIX   0
N1    3    0.563874    0.641393    1.099617    11.00000    0.07049    0.03738 =
         0.03819    0.00689    0.00431    0.00460
O4    4    0.592312    0.662401    1.144554    11.00000    0.07049    0.03738 =
         0.03819    0.00689    0.00431    0.00460
C5    1    0.497606    0.714769    0.873846    11.00000    0.07101    0.02950 =
         0.03798    0.00840    0.00593    0.00515
C9    1    0.532415    0.777341    0.776336    11.00000    0.07101    0.02950 =
         0.03798    0.00840    0.00593    0.00515
AFIX  43
H9    2    0.556192    0.763504    0.774000    11.00000   -1.20000
AFIX   0
C24   1    0.530378    0.684035    0.461157    11.00000    0.07101    0.02950 =
         0.03798    0.00840    0.00593    0.00515
AFIX  43
H24   2    0.553023    0.673230    0.509235    11.00000   -1.20000
AFIX   0
C22   1    0.498070    0.741379    0.345267    11.00000    0.07101    0.02950 =
         0.03798    0.00840    0.00593    0.00515
N2    3    0.561788    0.859360    0.108020    11.00000    0.07049    0.03738 =
         0.03819    0.00689    0.00431    0.00460
PART -1
O16   4    0.595664    0.914473    0.440178    10.50000    0.07049    0.03738 =
         0.03819    0.00689    0.00431    0.00460
AFIX   3
H16A  2    0.606884    0.919383    0.346708    10.50000   -1.50000
H16B  2    0.614614    0.911653    0.509488    10.50000   -1.50000
AFIX   0
PART 0
C23   1    0.532291    0.723929    0.412001    11.00000    0.07101    0.02950 =
         0.03798    0.00840    0.00593    0.00515
AFIX  43
H23   2    0.555577    0.738341    0.423395    11.00000   -1.20000
AFIX   0
O2    4    0.507023    0.567314    0.901573    11.00000    0.07049    0.03738 =
         0.03819    0.00689    0.00431    0.00460
O10   4    0.593361    0.839424    0.111811    11.00000    0.07049    0.03738 =
         0.03819    0.00689    0.00431    0.00460
Y2    5    0.462152    0.962152    0.860610    10.50000    0.02467    0.02467 =
         0.02318    0.00037    0.00037    0.00981
O14   4    0.468458    1.031542    0.818953    10.50000    0.07049    0.03738 =
         0.03819    0.00689    0.00431    0.00460
AFIX   3
H14   2    0.453488    1.046510    0.876693    10.50000   -1.50000
AFIX   0
O17   4    0.500000    1.000000    1.079992    10.25000    0.07049    0.03738 =
         0.03819    0.00689    0.00431    0.00460
AFIX   3
H17A  2    0.514060    0.985940    1.145522    10.25000   -1.50000
H17B  2    0.485940    1.014060    1.145522    10.25000   -1.50000
AFIX   0
O13   4    0.470621    0.527580    1.641426    11.00000    0.07049    0.03738 =
         0.03819    0.00689    0.00431    0.00460
AFIX   3
H13A  2    0.456771    0.540480    1.712026    11.00000   -1.50000
AFIX   0
O15   4    0.471159    0.971159    0.569486    10.50000    0.07049    0.03738 =
         0.03819    0.00689    0.00431    0.00460
AFIX   3
H15   2    0.456849    0.956850    0.505916    10.50000   -1.50000
AFIX   0
HKLF 4


REM  190610c_a.res in P-42(1)m
REM wR2 = 0.3291, GooF = S = 1.053, Restrained GooF = 1.051 for all data
REM R1 = 0.1209 for 6343 Fo > 4sig(Fo) and 0.1419 for all 8216 data
REM 178 parameters refined using 194 restraints

END

WGHT      0.1947     84.3262

REM Highest difference peak  3.594,  deepest hole -4.683,  1-sigma level  0.231
Q1    1   0.4607  1.0393  1.0645  10.50000  0.05    3.59
Q2    1   0.4598  1.0402  0.8879  10.50000  0.05    3.49
Q3    1   0.4607  0.9607  0.1690  10.50000  0.05    3.35
Q4    1   0.4597  0.9597  0.5518  10.50000  0.05    3.26
Q5    1   0.4600  0.5401  1.6502  11.00000  0.05    3.02
Q6    1   0.4603  0.9603  0.3925  10.50000  0.05    2.80
Q7    1   0.4611  1.0389  1.2233  10.50000  0.05    2.12
Q8    1   0.5416  0.5411  0.9846  11.00000  0.05    1.46
Q9    1   0.6015  0.9241  0.4321  11.00000  0.05    1.15
Q10   1   0.4598  0.8816  0.5449  11.00000  0.05    1.13
Q11   1   0.4788  0.9788  0.4674  10.50000  0.05    1.13
Q12   1   0.5000  0.5000  0.8791  10.50000  0.05    1.12
Q13   1   0.4635  0.5399  1.4096  11.00000  0.05    1.10
Q14   1   0.4606  0.5401  1.2753  11.00000  0.05    1.06
Q15   1   0.5822  0.5757  1.1662  11.00000  0.05    0.94
Q16   1   0.4794  0.9794  0.5938  10.50000  0.05    0.93
Q17   1   0.4958  0.9019  0.8733  11.00000  0.05    0.86
Q18   1   0.4791  1.0803  0.8895  11.00000  0.05    0.86
Q19   1   0.4619  0.5385  1.8379  11.00000  0.05    0.85
Q20   1   0.4405  0.8994  0.8654  11.00000  0.05    0.83
Q21   1   0.4411  0.9787  0.4576  11.00000  0.05    0.82
Q22   1   0.4632  0.9203  0.6001  11.00000  0.05    0.80
Q23   1   0.4586  0.6201  0.3333  11.00000  0.05    0.79
Q24   1   0.4203  0.6225  0.8838  11.00000  0.05    0.79
;
_shelx_res_checksum                26987
_shelx_hkl_file
;
   0   0   1    5.65    3.67
   0   0   2 1420.81   56.31
   0   0   3   22.32   11.79
   0   0   4 1248.31   74.77
   0   0   5  745.76   62.72
   0   0   6 1679.78  104.86
   0   0   7   35.56   25.68
   0   0   8   28.84   25.67
   0   0   9  474.18   76.48
   0   0  10  122.63   46.84
   0   0  11  -12.84   28.59
  -1   0   1  110.54   12.24
   1   0   1   82.23    9.46
  -1   0   2  623.29   38.43
   1   0   2  656.32   37.35
   0  -1   2  644.48   38.34
   0   1   2  651.24   37.40
   1   0   3    8.69   10.93
  -1   0   3   24.95   13.87
   0  -1   3   12.42   11.70
   0   1   3   11.20    9.21
  -1   0   4  850.47   60.91
   0  -1   4  805.23   61.47
   0   1   4  699.35   57.04
   1   0   4  737.39   58.48
   0  -1   5   66.55   26.30
  -1   0   5   79.18   27.98
   1   0   5   68.28   25.93
   0   1   5   55.36   25.07
   1   0   6  559.90   66.86
  -1   0   6  667.54   75.69
   0  -1   6  646.14   75.43
   0   1   6  614.94   69.09
   1   0   7   20.65   21.89
  -1   0   7   52.10   28.96
   0  -1   7   47.30   28.78
   0   1   7   31.35   27.12
   0  -1   8   23.53   23.18
  -1   0   8   -0.19   19.14
   1   0   8   -4.86   15.56
   0   1   8   18.09   25.25
   0  -1   9  351.41   75.89
   0   1   9  336.11   70.25
  -1   0   9  373.66   70.55
   1   0   9  270.52   67.62
   0   1  10  114.92   45.46
   1   0  10  114.47   47.24
  -1   0  10   39.52   26.30
   0  -1  10   99.94   48.07
   0  -1  11   45.15   28.62
   1   0  11  -16.77   22.81
  -1   0  11   30.24   34.04
   0   1  11   -1.70   23.32
   1  -1   1  109.54   11.37
  -1  -1   1   92.98   10.36
   1  -1   2 1353.64   55.46
   1   1   2 1417.06   53.47
  -1   1   2 1427.07   56.68
  -1  -1   2 1357.49   56.23
   1  -1   3 1759.19   76.73
  -1   1   3 1843.18   78.12
  -1  -1   3 1806.23   78.22
   1   1   3 1791.47   75.78
  -1  -1   4 1546.39   81.47
   1   1   4 1358.50   75.82
  -1   1   4 1434.43   78.74
   1  -1   4 1301.45   76.92
   1  -1   5   28.07   22.59
  -1  -1   5    8.85   10.07
   1   1   5   25.25   17.33
  -1   1   5   15.46   19.25
  -1   1   6  592.27   69.46
  -1  -1   6  530.00   66.20
   1   1   6  571.24   66.51
   1  -1   6  577.03   67.10
  -1  -1   7  136.44   38.16
  -1   1   7  181.20   39.95
   1  -1   7  203.20   40.97
   1   1   7   95.37   34.99
  -1  -1   8   37.24   27.09
   1  -1   8   34.69   25.55
  -1   1   8   35.29   30.62
   1   1   8   34.36   21.53
   1  -1   9  399.75   74.79
  -1   1   9  313.05   66.14
   1   1   9  423.91   73.34
  -1  -1   9  369.86   69.33
  -1   1  10   55.43   38.75
   1   1  10   43.59   34.59
   1  -1  10  100.19   37.87
  -1  -1  10    6.30   20.39
  -1   1  11   20.09   30.11
  -1  -1  11   43.30   32.67
   1   1  11   39.04   22.13
   1  -1  11   19.04   20.33
  -2   0  -1  768.47   27.50
   2   0   1  761.40   26.38
   0   2   1  772.78   26.69
  -2   0   1  697.99   29.29
   0  -2   2   18.08    9.59
   0   2   2   19.60    8.51
  -2   0   2   28.25   11.23
   2   0   2   23.39    8.38
  -2   0   3   63.87   18.25
   2   0   3   55.79   13.41
   0  -2   3   60.39   16.57
   0   2   3   55.11   12.87
  -2   0   4  679.86   55.12
   2   0   4  596.96   52.80
   0  -2   4  700.51   56.42
   0   2   4  631.84   54.19
  -2   0   5  655.68   58.82
   0   2   5  631.15   57.22
   2   0   5  471.18   52.70
   0  -2   5  628.00   58.58
   2   0   6 1108.94   84.03
   0   2   6 1014.74   83.96
   0  -2   6 1093.02   89.60
  -2   0   6 1088.13   86.81
   2   0   7   30.25   23.42
   0  -2   7   44.99   27.29
  -2   0   7   45.21   33.97
   0   2   7   17.21   25.24
   2   0   8   29.68   22.75
  -2   0   8    5.16   20.77
   0  -2   8   34.31   22.98
   0   2   8   15.81   23.12
   2   0   9  237.73   62.29
  -2   0   9  225.17   59.28
   0  -2   9  251.92   59.79
   0   2   9  219.72   57.91
   0   2  10   81.93   43.68
   2   0  10   54.41   41.27
  -2   0  10   52.23   34.53
   0  -2  10  101.43   43.83
   0   2  11   51.10   35.93
   0  -2  11   -5.27   22.66
  -2   0  11   18.54   33.32
   2   0  11   54.14   34.30
  -2   1   1  201.33   16.86
  -1   2  -1  192.02   14.06
   2   1   1  219.37   14.20
  -2   1  -1  186.13   14.57
   2  -1   1  183.90   14.72
   1  -2   1  214.38   14.92
  -2  -1  -1  170.71   12.87
  -1  -2   1  188.34   13.34
   1   2   1  159.13   12.07
  -1   2   1  221.12   15.72
  -2  -1   1  219.52   16.51
  -1   2   2  816.93   41.59
   1   2   2  817.02   40.26
   2  -1   2  782.94   41.86
  -1  -2   2  752.33   41.39
  -2  -1   2  819.51   43.21
  -2   1   2  783.27   43.17
   1  -2   2  812.10   42.67
   2   1   2  839.02   40.57
  -1  -2   3  201.59   27.33
   1  -2   3  224.34   28.12
  -2  -1   3  220.02   30.88
   2   1   3  205.67   25.65
  -2   1   3  185.49   28.15
  -1   2   3  200.23   26.63
   2  -1   3  196.57   26.00
   1   2   3  210.73   27.02
  -1  -2   4  588.36   52.32
  -2   1   4  637.23   52.46
   2   1   4  486.42   46.83
   2  -1   4  514.35   48.00
   1  -2   4  532.61   50.59
   1   2   4  531.70   47.65
  -1   2   4  549.43   49.52
  -2  -1   4  557.48   52.11
   1  -2   5   46.94   24.45
   2   1   5   60.51   23.74
  -2   1   5   51.62   20.64
  -1   2   5   50.20   22.90
  -2  -1   5   51.68   21.47
   1   2   5   76.15   24.47
   2  -1   5   52.21   22.66
  -1  -2   5   59.95   26.47
   1   2   6  375.77   55.59
   1  -2   6  407.92   60.54
  -2   1   6  389.62   56.93
  -1   2   6  422.06   59.84
   2   1   6  356.31   53.33
  -2  -1   6  381.10   59.27
   2  -1   6  391.15   57.59
  -1  -2   6  390.75   61.52
  -1  -2   7   39.93   28.35
   1  -2   7   18.91   21.85
   2   1   7   58.11   29.55
  -2  -1   7   62.18   35.39
   1   2   7   65.97   31.42
  -1   2   7   53.59   30.83
  -2   1   7   88.62   35.33
   2  -1   7  100.16   31.78
  -1  -2   8   53.02   26.13
   1   2   8    9.06   15.31
  -1   2   8   15.34   23.98
   2  -1   8   77.51   38.77
   1  -2   8   -0.59   16.90
   2   1   8    7.09   16.29
  -2  -1   8   35.11   30.24
  -2   1   8   61.87   31.02
  -2  -1   9  254.03   61.52
   1   2   9  211.50   59.25
  -1   2   9  228.42   58.55
   2   1   9  194.98   56.04
   1  -2   9  229.46   58.56
  -2   1   9  170.38   50.05
   2  -1   9  209.87   54.32
  -1  -2   9  167.10   59.93
  -1   2  10   78.44   34.14
  -2   1  10   66.08   35.12
  -1  -2  10   40.30   29.60
   1   2  10   50.41   35.02
   2  -1  10   55.69   38.36
  -2  -1  10   37.28   32.85
   1  -2  10   31.99   30.12
   2   1  10   63.69   37.75
   2   1  11   78.52   43.39
  -2  -1  11    8.29   20.64
   1   2  11  -40.32   30.38
  -1  -2  11   20.26   33.38
   1  -2  11  -12.17   23.03
  -2   1  11  136.43   50.12
   2  -1  11   47.49   32.64
  -1   2  11  -21.20   25.03
  -2  -2   1  716.20   27.24
   2  -2   1  705.98   25.92
   2   2   1  776.21   26.61
  -2   2  -1  705.08   25.74
   2   2  -2 1046.16   28.90
   2  -2   2 1104.86   49.12
  -2   2   2 1060.76   49.22
   2   2   2 1115.35   45.56
  -2  -2   2 1086.55   49.72
   2  -2   3  212.54   27.94
  -2  -2   3  211.87   28.43
  -2   2   3  192.93   27.87
   2   2   3  174.41   24.10
  -2  -2   4  398.69   43.43
  -2   2   4  284.21   28.65
   2  -2   4  338.78   40.31
   2   2   4  336.54   39.18
  -2   2   5  469.00   49.14
   2  -2   5  446.25   50.26
  -2  -2   5  478.10   50.96
   2   2   5  411.71   48.23
  -2   2   6  587.84   66.33
   2   2   6  481.96   57.92
  -2  -2   6  662.74   69.97
   2  -2   6  693.31   68.43
   2  -2   7   49.40   30.72
  -2   2   7   45.22   30.96
  -2  -2   7   78.06   33.22
   2   2   7   48.36   29.39
  -2   2   8   46.82   31.46
   2   2   8   24.83   26.51
   2  -2   8   56.80   36.29
  -2  -2   8   69.69   38.32
   2   2   9  122.86   49.87
   2  -2   9   68.27   39.90
  -2  -2   9  179.26   52.69
  -2   2   9  136.08   50.32
   2  -2  10   34.23   31.45
   2   2  10   86.45   37.95
  -2  -2  10   22.96   34.04
  -2   2  10   34.48   32.98
  -2  -2  11   -3.12   23.91
   2   2  11   53.73   33.28
   2  -2  11   11.12   25.88
  -2   2  11   27.38   28.69
  -3   0  -1  217.89   13.92
   0   3   1  228.68   15.81
   0  -3   1  227.80   14.90
   3   0  -1  204.66   14.54
  -3   0   1  236.00   18.06
   3   0   1  215.05   13.92
   3   0   2 1638.96   55.52
   0   3   2 1607.85   55.31
  -3   0   2 1592.65   61.87
   0  -3   2 1573.58   56.28
   0   3   3  201.72   26.48
   0  -3   3  193.87   27.09
   3   0   3  184.31   26.39
  -3   0   3  226.37   29.26
   0   3   4  158.93   29.05
   0  -3   4  174.26   29.57
   3   0   4  178.04   31.18
   0  -3   5   41.76   22.95
   3   0   5   23.68   20.35
   0   3   5   26.73   18.82
  -3   0   5   23.59   19.19
  -3   0   6  242.03   51.04
   3   0   6  183.39   45.33
   0   3   6  211.87   43.91
   0  -3   6  178.20   48.22
   0   3   7   28.14   28.01
   0  -3   7   52.67   31.23
   3   0   7   30.89   23.41
  -3   0   7   21.15   26.00
  -3   0   8   25.97   21.71
   0   3   8  -18.20   16.88
   0  -3   8  -20.89   16.71
   3   0   8   36.47   24.44
   3   0   9  159.96   50.83
  -3   0   9  133.05   49.33
   0   3   9  142.80   46.43
   0  -3   9  178.64   52.00
   0  -3  10   29.84   28.07
   0   3  10    9.71   29.35
  -3   0  10   39.14   30.32
   3   0  10   33.53   32.40
   0   3  11   -5.01   25.76
   3   0  11    5.13   25.30
   0  -3  11   41.91   30.92
  -3   0  11   11.58   28.55
   3   1  -1  297.66   15.15
  -3  -1   1  342.56   16.00
  -1  -3   1  343.07   18.04
   3  -1   1  302.19   16.68
  -3   1  -1  294.10   16.81
  -3  -1  -1  316.28   16.50
  -1   3   1  350.21   19.14
   3   1   1  329.26   16.76
  -3   1   1  313.93   20.88
   1  -3   1  321.08   17.16
  -3  -1   1  315.34   18.79
   1   3   1  325.01   18.36
   1  -3   2 1816.53   61.14
  -3   1   2 1756.49   66.24
  -1  -3   2 1842.76   61.68
  -1   3   2 1828.55   61.30
   3  -1   2 1756.25   62.53
   3   1   2 1788.38   57.53
  -3  -1   2 1735.86   64.26
   1   3   2 1841.32   58.67
  -1   3   3 2489.45   91.06
  -1  -3   3 2657.58   92.89
   1   3   3 2579.60   86.84
  -3   1   3 2648.97   95.40
   1  -3   3 2700.00   93.30
   3   1   3 2598.42   87.94
   3  -1   3 2478.44   88.96
  -3  -1   3 2752.44   97.22
   1  -3   4  413.55   45.69
   1   3   4  409.97   41.85
  -3  -1   4  429.88   44.81
  -1  -3   4  444.36   44.26
  -1   3   4  414.80   45.07
   3  -1   4  395.02   43.65
   3   1   4  338.86   39.69
  -3   1   5    1.70   10.50
  -1  -3   5   10.53   12.04
   1   3   5   14.81   16.96
   3  -1   5    2.94   15.02
  -3  -1   5    8.42   15.47
   1  -3   5   26.17   17.08
   3   1   5   34.54   18.14
  -1   3   5   38.15   20.42
  -1  -3   6  210.12   46.46
   3   1   6  172.61   41.06
   3  -1   6  188.76   41.69
  -3  -1   6  240.30   46.64
  -3   1   6  201.37   44.82
  -1   3   6  187.21   41.61
   1  -3   6  208.37   44.98
   1   3   6  197.47   41.30
  -1  -3   7  262.91   46.71
   3  -1   7  263.91   48.29
   1  -3   7  268.47   48.60
  -3   1   7  279.34   53.58
  -3  -1   7  236.31   47.12
  -1   3   7  224.76   50.15
   3   1   7  233.66   45.35
   1   3   7  240.15   41.84
  -1  -3   8  -15.44   20.48
   1  -3   8   39.73   19.12
  -1   3   8    4.91   15.48
   3   1   8   52.26   26.30
   3  -1   8  104.91   33.17
   1   3   8   20.80   21.32
  -3  -1   8   63.22   36.82
  -3   1   8   58.40   29.16
   1   3   9  174.92   53.15
   3   1   9  152.90   49.78
   1  -3   9  166.22   51.47
  -1  -3   9  184.84   51.67
   3  -1   9  178.39   51.20
  -3  -1   9  221.77   61.32
  -3   1   9  195.31   54.25
  -1   3   9  178.06   52.48
   3  -1  10   41.24   34.03
  -1   3  10   65.60   32.15
  -3  -1  10    0.80   20.67
  -3   1  10   45.57   33.32
  -1  -3  10   55.19   40.82
   3   1  10   35.95   33.60
   1  -3  10   28.11   29.51
   1   3  10   80.12   41.78
  -1  -3  11   74.38   40.25
   3  -1  11   12.15   30.23
  -3  -1  11   -6.80   27.01
   1   3  11   43.96   36.14
  -1   3  11   -2.78   27.90
  -3   1  11   35.87   33.71
   1  -3  11    1.84   23.66
   3   1  11   -2.89   25.09
   3  -2   1  262.47   12.86
  -3  -2   1  293.26   14.11
  -2   3   1  311.30   18.25
  -3   2   1  298.86   19.14
   3   2   1  278.32   16.31
  -3   2  -1  296.95   14.23
   3  -2   1  275.52   15.87
   2   3   1  307.38   17.94
   2  -3   1  293.34   15.95
   3   2  -1  262.03   14.00
  -3  -2   1  294.47   17.68
  -3   2  -1  262.46   15.37
  -2   3  -1  256.27   14.88
  -2  -3   1  294.41   17.14
   3  -2   2  158.37   20.36
  -3  -2   2  227.30   24.35
   3   2   2  197.50   19.47
  -3   2   2  169.37   22.52
   2   3   2  168.82   19.05
  -2   3   2  186.15   22.08
  -2  -3   2  249.95   24.92
   2  -3   2  174.85   21.70
   3  -2   3  249.54   29.92
  -3  -2   3  260.96   30.53
   2   3   3  261.18   28.91
  -2   3   3  246.48   30.88
  -3   2   3  259.69   32.32
   2  -3   3  230.95   28.86
   3   2   3  220.95   26.40
  -2  -3   3  261.47   32.28
  -2   3   4  -68.86   26.43
   3   2   4  127.50   25.20
   2  -3   4  104.31   24.24
  -3   2   4  -89.25   34.59
   3  -2   4  111.46   25.94
  -2  -3   4  118.88   25.79
  -3  -2   4  159.91   30.76
   2   3   4  118.97   26.23
   3   2   5   13.53   11.20
  -3   2   5   28.60   19.17
  -2  -3   5   46.24   23.24
   2  -3   5   35.43   17.93
  -2   3   5   23.70   12.22
  -3  -2   5   72.28   26.71
   3  -2   5   24.33   10.81
   2   3   5   38.46   21.18
  -2   3   6   95.26   31.49
  -3   2   6  135.95   40.16
   3  -2   6  100.42   34.63
   2   3   6   85.80   31.19
  -3  -2   6  130.59   37.71
   3   2   6   60.80   29.66
   2  -3   6   93.86   29.40
  -2  -3   6  135.03   40.70
  -2   3   7  114.47   40.29
   2  -3   7  142.39   42.36
  -2  -3   7   83.62   34.81
   3  -2   7  144.82   42.73
   3   2   7  131.79   38.19
   2   3   7   88.94   32.49
  -3   2   7  138.04   38.27
  -3  -2   7  125.24   42.23
   2   3   8   42.79   31.90
  -2   3   8   36.01   27.47
   3  -2   8   32.25   33.63
  -3  -2   8   32.67   31.38
  -2  -3   8   10.79   19.42
   3   2   8   76.68   37.24
  -3   2   8    0.29   19.92
   2  -3   8   42.52   28.51
   3  -2   9   55.89   38.42
   3   2   9  125.07   47.36
  -3   2   9  119.63   44.74
  -3  -2   9   62.38   36.76
   2   3   9  150.25   49.79
  -2  -3   9   88.08   46.03
  -2   3   9  103.17   37.73
   2  -3   9  142.83   44.74
   2   3  10   61.77   34.17
  -2   3  10   25.78   26.50
  -3  -2  10   -1.36   20.82
   3   2  10   33.54   35.21
   2  -3  10   43.21   29.59
  -3   2  10   26.24   24.14
   3  -2  10   22.97   31.28
  -2  -3  10   80.22   39.07
  -2   3  11   44.35   31.31
   3   2  11   24.54   29.28
   2   3  11   -0.58   23.80
  -3  -2  11   40.96   37.14
  -3   2  11   49.38   34.63
   2  -3  11   32.15   34.48
   3  -2  11  -38.81   25.89
  -2  -3  11   63.33   37.54
   3   3   0   -3.43    3.45
   3  -3   1  401.83   16.23
  -3   3  -1  361.73   16.99
  -3  -3   1  413.66   21.12
   3   3   1  398.43   21.25
  -3   3   1  409.72   20.92
   3  -3   1  426.78   19.40
  -3  -3   1  420.13   17.01
  -3   3  -1  443.01   18.18
  -3   3   2 9577.09  146.98
   3   3   2 9337.54  132.26
  -3   3  -2 9999.00   84.07
   3   3  -2 8996.57   86.54
   3  -3   2 9500.63  141.48
  -3  -3   2 9620.66  142.43
  -3   3   3 2519.52   93.13
  -3  -3   3 2611.08   92.74
   3   3   3 2559.23   84.34
   3  -3   3 2638.86   91.72
   3  -3   4   76.47   19.51
   3   3   4   49.88   14.75
  -3  -3   4   87.38   22.68
  -3  -3   5   29.36   22.05
  -3   3   5    3.40    9.92
   3   3   5    3.34   14.26
   3  -3   5   21.63   16.82
   3  -3   6   40.96   28.83
  -3   3   6   41.56   27.29
   3   3   6   28.66   22.26
  -3  -3   6   70.26   27.37
   3  -3   7  381.04   58.78
  -3   3   7  363.57   57.47
   3   3   7  313.47   53.92
  -3  -3   7  371.97   58.02
  -3   3   8  134.67   41.93
  -3  -3   8  178.40   42.67
   3  -3   8  236.47   51.54
   3   3   8  178.99   47.71
   3   3   9   64.57   37.99
  -3   3   9   27.53   24.91
   3  -3   9   63.72   35.84
  -3  -3   9   55.01   35.83
  -3  -3  10  -16.88   18.90
   3  -3  10   24.00   33.97
   3   3  10   19.17   33.96
  -3   3  10   28.67   26.25
  -3  -3  11  101.86   47.04
   3   3  11    9.53   23.07
   3  -3  11   43.00   37.48
  -3   3  11   15.45   30.07
   0   4   0 1313.17   31.28
  -4   0   0 4115.54   60.16
  -4   0   1  331.11   19.02
   0  -4   1  312.40   17.17
  -4   0  -1  285.03   15.21
  -4   0   1  282.71   19.18
   4   0   1  286.50   15.08
   0   4   1  305.32   18.27
   0   4   2  931.79   42.27
   0  -4   2  931.48   43.46
  -4   0   2  992.42   49.62
   4   0   2  810.38   39.58
   0  -4   3  166.76   25.20
   4   0   3  181.11   24.23
   0   4   3  172.72   23.85
  -4   0   3  207.05   30.16
   4   0   4  621.61   52.75
   0   4   4  660.72   52.78
   0  -4   4  745.87   58.08
   0  -4   5  147.05   30.55
   0   4   5  135.83   29.78
  -4   0   5   94.51   26.33
   4   0   5   87.66   20.77
  -4   0   6  515.93   61.94
   0   4   6  445.68   57.39
   4   0   6  452.84   57.55
   0  -4   6  537.96   61.67
   0  -4   7   21.61   24.36
  -4   0   7   33.88   22.00
   0   4   7   19.58   15.12
   4   0   7   13.15   15.86
   0   4   8   54.55   29.16
   0  -4   8  -13.90   23.89
  -4   0   8  -12.42   16.87
   4   0   8    4.86   20.62
  -4   0   9   81.74   41.07
   0   4   9   86.37   36.17
   4   0   9  104.90   40.07
   0  -4   9  108.63   47.35
   0   4  10    9.28   22.76
   4   0  10   47.64   36.68
  -4   0  10   -1.73   27.15
   0  -4  10    0.06   21.74
   4   0  11  -58.44   33.94
   0  -4  11  -23.46   25.74
  -4   0  11    7.43   27.68
  -4   1   0    5.19    2.64
   1  -4   0    2.03    1.22
  -4  -1   0    6.71    1.75
   4   1   0    7.16    1.79
   1   4   0    4.12    2.38
   4   1  -1  164.61   12.97
  -1  -4   1  179.61   13.54
  -4   1  -1  186.20   13.08
  -4   1  -1  142.83   11.71
   1   4   1  182.20   14.41
   1  -4   1  165.62   12.31
  -4  -1   1  175.98   14.19
  -4   1   1  176.88   15.75
  -4  -1  -1  150.92   11.26
  -4  -1   1  182.62   12.73
   4  -1   1  140.83   10.93
   4   1   1  165.02   11.93
  -1   4   1  160.72   13.26
   1   4   2  534.76   32.68
  -4   1   2  504.63   36.73
  -1   4   2  499.23   32.40
  -1  -4   2  518.10   33.21
   4   1   2  501.60   30.96
  -4  -1   2  475.55   33.65
   1  -4   2  525.49   32.38
   4  -1   2  511.11   31.98
  -1   4   3  169.47   26.29
   4   1   3  182.95   23.47
   1   4   3  166.25   23.41
   4  -1   3  146.86   22.84
  -4   1   3  143.98   29.06
   1  -4   3  211.06   26.90
  -1  -4   3  200.17   26.73
  -4  -1   3  183.18   29.87
   1  -4   4  598.17   55.39
   4   1   4  709.73   54.93
  -1   4   4  684.14   56.06
   1   4   4  730.64   55.89
  -1  -4   4  816.19   60.00
  -4  -1   4  436.81   40.23
   4  -1   4  715.34   55.75
  -4   1   4  422.96   40.03
   1   4   5   35.34   21.03
   4   1   5   21.51   15.73
  -1   4   5   38.49   18.77
  -4  -1   5   31.07   17.52
  -1  -4   5   41.69   20.26
   4  -1   5   16.81   12.32
  -4   1   5   42.55   20.66
   1  -4   5   44.03   18.96
   4  -1   6  155.09   37.32
   1   4   6  153.18   39.96
  -1   4   6  137.76   39.39
  -1  -4   6  174.85   42.04
   4   1   6  130.27   35.62
  -4  -1   6  196.19   39.66
   1  -4   6  214.15   42.02
  -4   1   6  170.94   42.07
   1   4   7   31.01   24.59
   4   1   7   21.43   24.26
  -4  -1   7   44.62   31.39
   4  -1   7   55.92   25.53
   1  -4   7   41.12   22.83
  -1  -4   7   63.52   33.28
  -1   4   7   40.12   25.62
  -4   1   7   47.90   29.65
  -4   1   8   52.00   34.79
  -1   4   8   23.76   23.02
   4  -1   8    8.36   19.95
  -1  -4   8  -11.01   20.92
   1   4   8    3.12   22.37
   4   1   8   26.79   22.36
   1  -4   8   21.34   21.55
  -4  -1   8    6.72   23.35
   1  -4   9   87.12   38.89
  -4   1   9   81.44   38.18
  -4  -1   9   79.13   34.96
   4  -1   9  105.35   40.14
   4   1   9  129.39   46.87
   1   4   9   42.27   35.68
  -1   4   9   34.36   23.90
  -1  -4   9   98.23   44.00
   1  -4  10   36.00   30.58
  -1  -4  10  -16.17   19.33
   4  -1  10   29.27   28.39
  -4  -1  10  -22.38   23.27
  -1   4  10   67.43   39.35
   4   1  10   96.59   46.14
  -4   1  10  -53.56   33.73
   1   4  10   29.48   31.17
   4  -1  11   -0.07   21.67
  -4  -1  11   -3.87   21.27
  -1  -4  11    1.05   25.07
  -4   1  11    5.03   26.79
   1   4  11   33.08   32.33
  -1   4  11  -15.26   26.78
   4   1  11  -42.27   37.06
   1  -4  11   22.66   33.26
  -4   2   0   44.64    7.58
   4   2   0   55.79    6.24
   2  -4   0   66.68    6.58
  -4  -2   0   60.54    7.04
  -4   2  -1  491.77   21.57
  -4   2   1  533.48   25.91
   4  -2   1  474.26   20.84
  -2   4   1  535.69   24.20
  -4   2  -1  474.79   20.77
  -4  -2   1  557.44   22.48
  -4  -2   1  547.83   24.38
  -2  -4   1  540.85   24.36
   2   4   1  546.74   25.59
   4  -2   1  476.73   20.57
   4   2  -1  456.30   21.37
   4   2   1  521.02   23.25
   2  -4   1  511.29   20.94
   4   2   2   42.15    8.05
  -2   4   2   65.48   13.31
   2   4   2   71.77   12.76
  -2  -4   2   85.07   15.08
   4  -2   2   63.40   12.33
   2  -4   2   61.01   12.89
  -4  -2   2   83.68   16.38
  -4   2   2   67.25   15.19
   2   4   3   71.42   14.34
  -4   2   3   96.92   23.07
  -2   4   3   82.94   17.73
   2  -4   3  101.18   18.51
   4   2   3   87.11   17.69
   4  -2   3   75.51   16.04
  -2  -4   3  104.98   20.76
  -4  -2   3  110.58   23.65
  -4  -2   4  490.02   46.70
   2   4   4  632.94   53.32
  -2  -4   4  800.54   59.32
  -2   4   4  401.62   41.39
   2  -4   4  703.79   55.98
   4  -2   4  694.49   55.78
  -4   2   4  403.70   40.33
   4   2   4  650.60   52.00
   4   2   5  129.54   27.92
  -4   2   5  155.21   31.98
  -4  -2   5  155.00   32.18
  -2  -4   5  139.74   31.66
   2   4   5  118.32   30.36
   4  -2   5  166.00   30.95
  -2   4   5  176.82   33.18
   2  -4   5  143.87   32.71
   4   2   6  204.90   46.04
  -4  -2   6  273.77   46.16
  -2  -4   6  280.60   48.49
   2   4   6  216.26   41.16
   4  -2   6  260.47   47.69
   2  -4   6  299.00   45.87
  -2   4   6  239.28   46.26
  -4   2   6  282.63   45.73
  -4  -2   7   46.11   31.96
   4  -2   7   40.77   28.40
   2   4   7   50.36   28.67
  -4   2   7   68.51   29.38
   2  -4   7   51.76   27.14
  -2  -4   7   61.76   31.77
   4   2   7   43.64   26.35
  -2   4   7   37.26   27.07
  -2  -4   8   23.76   24.80
  -4  -2   8   81.97   40.31
  -2   4   8   54.52   30.81
  -4   2   8   43.39   31.66
   4  -2   8   40.23   29.31
   2  -4   8   22.08   30.06
   2   4   8   55.63   32.27
   4   2   8   69.38   33.09
  -2   4   9   -4.20   20.35
   2  -4   9   69.20   37.11
  -2  -4   9   48.57   34.19
  -4   2   9   35.87   30.47
   4  -2   9   27.02   29.27
   2   4   9   76.23   34.35
   4   2   9   51.35   36.36
  -4  -2   9    0.67   25.45
  -4   2  10   15.36   21.49
  -2  -4  10   70.44   36.49
  -2   4  10   76.42   40.07
   4  -2  10   30.51   26.99
   4   2  10  124.36   49.73
   2   4  10   97.51   44.82
   2  -4  10   55.99   28.56
  -4  -2  10    5.68   21.46
  -2   4  11   69.31   42.08
   2  -4  11   -3.20   27.95
  -2  -4  11   36.80   34.60
   2   4  11  -35.89   35.33
  -4  -2  11   24.26   30.93
  -4   2  11   83.68   37.46
   4   2  11  -15.80   28.22
   4  -2  11   30.98   32.34
   4   3   0    8.25    4.32
  -4  -3   0   13.20    4.76
  -3   4   0    9.42    3.07
   3   4   0    7.89    3.79
   3  -4   0    8.07    2.71
  -4   3  -1  270.66   14.42
  -4  -3   1  283.60   16.54
   3  -4   1  283.72   15.37
   4  -3   1  274.75   15.97
  -4  -3   1  259.88   18.39
   4  -3   1  269.54   15.74
  -4   3   1  303.91   19.52
   4   3   1  325.30   19.35
   3  -4   1  230.96   14.88
   3   4   1  316.29   20.46
  -3   4   1  311.39   19.16
  -3   4  -1  212.82   13.74
  -4   3  -1  328.87   17.86
  -3  -4   1  321.90   19.95
  -3  -4   2 1637.65   33.74
   4   3   2 1690.68   56.69
  -3   4   2 1720.97   60.33
   3  -4   2 1725.86   58.37
  -4   3   2 1733.23   63.25
  -3  -4   2 1716.03   59.46
  -3   4  -2 1592.75   32.00
   4  -3   2 1579.51   58.55
  -4   3  -2 1641.74   39.93
  -4  -3   2 1849.58   62.31
   3   4   2 1662.98   57.03
  -4  -3   2 1742.89   42.70
   4  -3   3   38.23   10.79
  -3  -4   3   45.03   16.46
  -3   4   3   44.21   14.74
  -3   4  -3   72.65    7.79
   3  -4   3   50.39   15.42
   3   4   3   45.72   15.39
  -4  -3   3  101.57   24.41
  -4   3   3   52.65   17.34
   4   3   3   52.85   15.14
   3  -4   4  283.07   37.90
  -4  -3   4  314.01   39.45
  -3  -4   4  364.08   42.23
   4  -3   4  302.96   38.21
   3   4   4  268.81   34.36
  -3   4   4  244.75   35.27
   4   3   4  245.82   35.29
  -4  -3   5   22.45   14.99
  -4   3   5   36.29   22.58
  -3  -4   5   40.94   21.74
   4   3   5   28.93   19.43
  -3   4   5   75.16   28.01
   3  -4   5   33.72   19.79
   4  -3   5   46.47   21.54
   3   4   5   36.74   24.04
  -4   3   6  104.09   33.87
  -4  -3   6   45.05   22.54
   4  -3   6   57.67   27.87
  -3  -4   6   50.94   26.32
   4   3   6   21.85   20.90
   3  -4   6   70.49   25.74
  -3   4   6   47.62   25.84
   3   4   6   47.16   26.67
   3  -4   7  158.22   40.80
  -3   4   7  116.77   43.81
  -4  -3   7  122.97   40.46
  -3  -4   7  113.57   40.15
   3   4   7   94.56   37.84
  -4   3   7  150.19   43.06
   4  -3   7  120.33   39.94
   4   3   7  130.47   38.26
   4  -3   8  112.27   40.46
  -3   4   8   91.21   44.31
   3   4   8   95.24   43.23
  -3  -4   8   59.38   40.63
   4   3   8   91.13   39.05
  -4  -3   8   66.47   41.29
  -4   3   8   39.37   36.21
   3  -4   8   68.55   46.79
   3  -4   9   47.39   34.57
  -3   4   9   -6.55   19.63
   3   4   9   77.31   41.91
  -3  -4   9   -6.79   19.40
  -4  -3   9   63.84   31.38
   4  -3   9   27.12   23.19
   4   3   9   61.67   39.49
  -4   3   9    1.55   19.82
   3   4  10   78.24   34.92
   4  -3  10   29.74   28.65
  -3   4  10   69.52   38.38
  -4  -3  10   29.89   33.45
   3  -4  10   60.64   35.97
  -4   3  10   23.05   37.02
  -3  -4  10   59.49   36.74
   4   3  10   68.01   41.84
  -3  -4  11   76.84   41.26
   3  -4  11   74.59   42.33
   3   4  11  -57.39   38.92
   4   3  11   63.39   41.72
  -4   3  11   63.72   39.74
   4  -3  11   23.49   34.31
  -4  -3  11   36.48   33.59
  -3   4  11   34.07   29.98
   4   4   0   49.04    7.26
   4  -4   0   41.87    4.60
  -4   4   0   47.59    5.08
   4   4   1 1521.44   44.23
   4  -4   1 1392.74   33.97
  -4  -4   1 1517.56   42.64
  -4   4   1 1487.61   40.81
  -4  -4   2  666.87   25.06
   4   4   2  768.51   40.18
  -4   4   2  819.23   42.74
  -4  -4   2  795.74   42.30
   4  -4   2  742.93   38.40
  -4   4  -2  677.08   25.35
  -4   4  -3    3.81    3.40
  -4  -4   3   28.99   13.15
   4  -4   3    8.78    7.96
  -4   4   3   24.05   12.42
   4   4   3    4.11    7.09
  -4   4   4 1737.09   86.04
  -4  -4   4 1855.06   88.94
   4  -4   4 1681.55   85.05
  -4   4  -4 1745.15   45.68
   4   4   5  467.44   51.07
  -4  -4   5  522.58   57.50
  -4   4   5  504.04   54.87
   4  -4   5  471.04   52.26
  -4  -4   6  198.83   39.35
   4  -4   6  203.37   40.74
   4   4   6  137.43   36.75
  -4   4   6  192.60   40.90
  -4  -4   7   66.15   36.04
   4  -4   7   75.11   33.05
   4   4   7   68.58   34.18
  -4   4   7   81.69   36.91
  -4  -4   8   88.80   44.23
   4   4   8   65.85   40.56
  -4   4   8  153.96   47.92
   4  -4   8   61.14   40.08
   4  -4   9   15.78   23.46
   4   4   9   51.73   34.28
  -4  -4   9   -6.45   17.02
  -4   4   9   27.69   25.16
  -4  -4  10  122.41   44.24
   4   4  10  149.99   53.97
   4  -4  10   97.56   44.31
  -4   4  10  179.42   49.20
  -4   4  11   77.13   38.36
   4  -4  11  130.44   50.27
   4   4  11   51.94   41.91
  -4  -4  11   40.80   39.45
  -5   0   0   84.74   16.87
   0   5   0   69.23   13.87
   0   5   1  254.84   18.13
  -5   0   1  265.59   18.18
   0  -5   1  239.63   15.75
  -5   0  -1  248.70   14.01
  -5   0   1  257.34   17.58
   5   0   1  255.12   14.06
   0   5   2  228.00   21.12
  -5   0   2  232.05   23.16
   5   0   2  233.48   19.98
   0  -5   2  248.16   22.10
  -5   0   3  465.11   42.34
   0   5   3  433.56   36.50
   0  -5   3  472.57   38.13
   5   0   3  429.18   36.52
   0  -5   4  109.91   25.28
   5   0   4  102.89   23.26
  -5   0   4   36.58   15.02
   0   5   4  100.99   24.31
   0   5   5    4.17   12.91
  -5   0   5   30.19   14.85
   5   0   5    9.17   15.20
   0  -5   5   18.63   15.83
   0   5   6   16.77   16.68
   5   0   6   11.72   13.99
   0  -5   6   41.97   22.67
  -5   0   6   45.13   27.61
   5   0   7   32.63   25.03
   0  -5   7   18.23   21.28
   0   5   7    3.31   18.02
  -5   0   7   12.98   22.12
   0   5   8    8.50   15.80
  -5   0   8   -5.82   19.73
   0  -5   8  -18.11   28.17
   5   0   8   12.70   24.62
   5   0   9   26.77   28.04
   0  -5   9   50.52   28.83
   0   5   9    8.61   18.37
  -5   0   9   14.40   18.91
   0  -5  10  -20.82   28.17
   5   0  10  -16.60   19.54
  -5   0  10   40.88   30.68
   0   5  10   14.04   22.65
  -5   0  11   43.03   35.91
   0  -5  11    7.24   29.76
   0   5  11   42.37   31.33
   5   0  11    2.34   23.23
   1  -5   0   14.80    3.69
  -5  -1   0   36.58    7.74
  -1   5   0    5.48    2.13
   1   5   0   31.99    6.75
   5   1   0   19.12    3.72
  -5   1   0   35.84    8.00
  -1   5   1  278.32   18.89
   5  -1   1  296.95   14.48
  -5   1   1  287.40   20.14
   1  -5   1  273.54   16.28
  -1  -5   1  292.29   17.62
  -5  -1   1  320.30   18.91
  -5  -1   1  308.69   18.93
  -5   1  -1  325.26   19.42
   5   1   1  260.31   15.47
   1   5   1  328.25   20.60
  -5   1  -1  308.78   16.04
  -5  -1   2 1010.63   49.25
  -5   1   2  952.50   50.04
   5  -1   2  919.47   43.05
   1  -5   2 1081.62   45.92
  -1  -5   2 1014.19   45.82
   5   1   2 1022.47   41.50
   1   5   2 1010.01   45.27
  -1   5   2  985.68   46.88
   5  -1   3 1515.31   66.47
   1  -5   3 1536.86   69.01
  -5  -1   3 1412.28   70.87
   5   1   3 1423.94   63.89
  -1   5   3 1497.24   67.35
   1   5   3 1430.11   65.26
  -1  -5   3 1457.98   67.36
  -5   1   3 1522.42   75.09
   5   1   4  401.38   41.09
   5  -1   4  449.03   44.79
  -1   5   4  379.18   43.23
   1   5   4  392.76   41.24
  -5  -1   4  377.19   44.42
   1  -5   4  401.68   46.68
  -5   1   4  309.76   40.45
  -1  -5   4  439.28   44.10
   5  -1   5   11.03   12.69
  -5   1   5   15.51   15.61
   1  -5   5   18.63   15.38
   1   5   5   11.76   15.22
  -5  -1   5   45.32   21.07
   5   1   5   16.43   14.18
  -1   5   5    7.18   12.36
  -1  -5   5   17.52   15.24
  -5   1   6   61.40   29.60
   5  -1   6   22.40   19.67
   1   5   6   17.25   18.40
  -5  -1   6   25.29   20.95
   5   1   6   30.71   24.72
   1  -5   6   27.56   21.74
  -1  -5   6   48.52   28.83
  -1   5   6   31.19   23.67
  -1   5   7  121.49   35.24
  -5   1   7   97.22   33.23
  -1  -5   7   74.39   32.73
   1   5   7   47.14   22.43
   5   1   7   59.91   31.76
  -5  -1   7   71.17   31.95
   5  -1   7   70.33   27.11
   1  -5   7   65.12   26.36
  -5  -1   8   80.35   29.87
   5  -1   8   66.56   32.75
   1   5   8   42.70   27.19
   1  -5   8   73.03   33.75
  -1   5   8   53.65   27.07
   5   1   8  113.07   39.73
  -1  -5   8   63.78   30.03
  -5   1   8  101.52   37.45
  -1  -5   9    4.89   22.73
   1   5   9  -18.64   21.04
   5   1   9   41.23   32.99
   1  -5   9    4.76   24.64
   5  -1   9   -7.56   21.03
  -5   1   9    6.01   19.96
  -1   5   9  -17.81   19.17
  -5  -1   9  -18.22   27.54
   5   1  10   87.15   37.11
   1  -5  10   -2.78   20.31
   5  -1  10   13.96   22.21
  -1  -5  10    8.89   20.38
  -1   5  10   11.44   22.59
   1   5  10  -19.73   21.11
  -5   1  10   -8.42   24.90
  -5  -1  10    7.36   22.74
  -5  -1  11   48.56   38.27
   1   5  11   61.71   40.78
   5  -1  11   28.99   32.69
   5   1  11   14.62   32.64
  -5   1  11    4.54   24.27
   1  -5  11    5.44   23.65
  -1   5  11  -15.74   29.27
  -1  -5  11    2.31   26.70
  -2   5   0   54.20    6.96
  -5  -2   0   48.87    6.11
   2   5   0   52.34    7.76
   2  -5   0   48.29    6.53
   5   2   0   54.10    6.70
  -2   5   1  390.70   21.88
   2  -5   1  386.90   19.42
   5  -2   1  360.46   17.38
   2   5   1  397.01   23.40
  -5   2  -1  353.42   21.65
  -5  -2   1  390.44   21.75
  -5  -2   1  429.52   22.85
  -2  -5   1  404.59   21.78
  -5   2  -1  338.66   17.43
   5   2   1  410.17   20.54
  -5   2   1  381.07   23.95
  -5  -2   2  520.24   33.72
  -5   2  -2  500.44   24.89
   2   5   2  453.68   30.58
   2  -5   2  415.15   28.70
   5  -2   2  456.36   30.07
  -5   2   2  464.50   35.18
   5   2   2  484.84   29.78
  -2   5   2  490.22   33.04
  -2  -5   2  501.59   32.79
   5  -2   3  126.60   21.51
   2  -5   3  133.61   21.01
  -5  -2   3  142.30   25.76
   5   2   3  117.63   20.02
  -5   2   3  116.41   23.50
   2   5   3  122.97   20.06
  -2   5   3  110.23   21.19
  -2  -5   3  154.44   25.00
  -2  -5   4  246.08   34.73
   5   2   4  190.86   30.09
  -5  -2   4  239.60   36.76
  -2   5   4  225.78   32.48
   5  -2   4  203.95   32.44
   2  -5   4  218.38   33.07
   2   5   4  172.99   29.46
  -5   2   4  192.93   32.15
  -2  -5   5   20.93   18.10
  -5   2   5   65.54   25.70
  -5  -2   5   31.77   19.95
   2  -5   5   18.85   18.20
   2   5   5   26.81   19.94
   5  -2   5    5.10   10.92
  -2   5   5   21.61   19.49
   5   2   5   23.87   18.64
  -5  -2   6   29.02   22.32
   2   5   6   22.34   16.43
  -5   2   6   19.74   21.16
   5  -2   6    8.69   14.22
  -2   5   6   17.98   18.09
   5   2   6    9.57   19.96
  -2  -5   6   -7.77   16.32
   2  -5   6   45.71   24.13
  -5   2   7   81.82   36.38
  -2   5   7  118.38   35.88
   5   2   7   44.84   27.61
  -5  -2   7  119.50   40.10
   2   5   7   69.96   25.78
  -2  -5   7  120.69   38.00
   2  -5   7   73.72   32.55
   5  -2   7   74.04   32.35
  -2  -5   8   64.53   33.87
   5  -2   8   77.07   36.32
   5   2   8   73.85   44.78
  -5  -2   8   48.99   33.12
   2  -5   8   70.98   35.39
   2   5   8   53.12   32.32
  -5   2   8   56.89   30.91
  -2   5   8   53.02   33.92
  -5  -2   9  -14.68   27.58
   2   5   9   38.15   25.16
  -2  -5   9   20.79   29.83
  -2   5   9   25.52   23.07
   2  -5   9   49.03   33.96
   5  -2   9  -25.39   30.94
   5   2   9   -7.04   22.42
  -5   2   9  -11.51   25.29
   2   5  10   40.99   35.81
   5   2  10  -10.69   21.81
  -2  -5  10   16.96   33.13
   5  -2  10   41.27   29.52
  -2   5  10   48.42   30.52
  -5  -2  10   26.11   27.93
   2  -5  10  -12.90   28.93
  -5   2  10    0.12   23.23
   5  -2  11   15.04   31.06
  -5  -2  11   52.32   30.24
   5   2  11   42.18   34.65
   2   5  11    8.84   35.97
  -5   2  11    3.64   26.12
   2  -5  11   19.05   22.75
  -2   5  11   21.07   35.99
  -2  -5  11   15.29   36.39
  -5   2  12   -0.23   32.65
  -3   5   0    0.28    2.22
   3  -5   0    3.53    2.12
   5   3   0    1.93    2.89
  -5   3  -1  389.79   17.15
   3   5   1  465.07   26.40
  -5   3  -1  481.25   25.53
   3  -5   1  456.98   21.59
   5   3   1  429.78   24.58
  -5  -3   1  496.12   25.32
   5  -3   1  368.75   18.21
  -5   3   1  364.46   22.36
  -3  -5   1  460.23   24.75
  -3   5   1  425.37   22.85
  -5  -3   1  360.00   22.13
   3  -5   2 1864.70   59.81
   3   5   2 1837.43   60.29
  -3  -5   2 1890.40   61.44
  -5   3  -2 1920.06   48.78
  -5   3   2 1774.60   66.21
   3  -5   2 1789.72   31.95
   5  -3   2 1734.85   59.23
  -3   5   2 1782.57   62.10
  -5  -3   2 1875.11   47.64
  -5  -3   2 2017.74   65.89
  -3  -5   2 1802.17   34.60
   5  -3   3 1284.55   65.78
   5   3   3 1360.32   61.88
  -5   3   3 1299.51   68.58
   3   5   3 1325.12   62.45
  -5  -3   3 1418.02   68.72
  -5   3  -3 1266.77   41.27
  -3   5   3 1332.72   66.48
  -3  -5   3 1411.95   65.40
   3  -5   3 1368.31   65.24
   5   3   4  111.50   26.88
  -5   3   4  232.43   35.94
   5  -3   4  108.62   25.69
   3   5   4  133.10   25.94
  -3   5   4  249.02   37.22
  -3  -5   4  146.17   31.25
  -5  -3   4  235.44   35.79
   3  -5   4   93.43   25.13
   5   3   5   29.08   19.51
  -5  -3   5   29.41   19.73
   3  -5   5   30.77   22.46
  -5   3   5   53.41   21.19
  -3  -5   5   27.24   19.98
  -3   5   5   34.94   22.62
   3   5   5   25.61   19.91
   5  -3   5   55.59   23.52
  -3  -5   6    1.36   12.08
   5   3   6   24.17   16.46
   3  -5   6   39.03   20.11
  -5   3   6   14.59   20.55
   5  -3   6    3.14   12.74
  -5  -3   6    9.65   15.87
   3   5   6   18.42   17.33
  -3   5   6    4.79   12.75
   3  -5   7  292.48   54.65
  -5   3   7  307.95   53.89
  -5  -3   7  297.53   56.66
  -3  -5   7  308.26   56.94
  -3   5   7  246.66   49.65
   5   3   7  291.93   51.99
   5  -3   7  292.47   53.52
   3   5   7  250.44   51.73
   5  -3   8  332.73   60.07
   3  -5   8  418.74   66.78
  -5  -3   8  348.48   60.30
  -5   3   8  344.85   64.76
  -3  -5   8  347.19   66.39
   3   5   8  360.37   60.49
   5   3   8  384.51   61.00
  -3   5   8  297.76   59.03
  -3  -5   9   41.41   27.29
   5  -3   9  -23.80   26.74
   5   3   9    7.84   19.96
   3   5   9   50.62   32.79
  -3   5   9   -3.96   20.83
  -5   3   9   16.76   19.87
   3  -5   9   25.88   32.37
  -5  -3   9   13.81   23.80
   5   3  10   48.62   32.39
  -3   5  10   99.35   42.28
  -3  -5  10   24.57   31.68
  -5   3  10   28.56   23.47
   3  -5  10   28.50   30.68
   5  -3  10  110.46   48.34
   3   5  10  116.27   40.39
  -5  -3  10   -4.43   21.06
   3   5  11   42.08   28.27
  -5   3  11   22.24   21.96
   5   3  11   23.49   35.76
  -3   5  11  101.02   46.81
   5  -3  11    7.21   27.63
  -5  -3  11   24.39   32.46
  -3  -5  11   84.30   43.62
   3  -5  11   38.87   33.39
   4   5   0   -2.29    2.96
   4  -5   0    0.91    1.58
  -4   5   0   -5.07    2.70
   5   4   0   -3.83    3.23
  -5  -4   1 1291.99   39.62
  -5   4  -1 1215.66   39.87
   5  -4   1 1153.20   31.19
  -4   5   1 1246.84   39.31
  -4  -5   1 1331.67   41.16
  -5   4   1 1211.13   37.92
   4  -5   1 1160.49   31.84
   5   4   1 1347.09   41.82
   4   5   1 1206.79   42.89
  -5   4  -1 1084.64   27.95
  -5  -4   1 1294.89   41.11
  -4  -5   2  481.39   20.94
   4   5   2  516.08   32.61
   5  -4   2  472.76   31.31
   5   4   2  531.38   32.63
  -5   4   2  500.21   35.29
  -4   5   2  505.82   33.61
  -5  -4   2  475.35   23.40
  -4  -5   2  557.32   34.10
  -5  -4   2  472.11   32.67
  -4   5  -2  462.59   21.58
  -5   4  -2  502.53   24.57
   4  -5   2  514.02   30.92
  -4   5   3   19.89   13.82
   4   5   3   24.75    9.83
  -5   4  -3   14.39    5.40
  -4  -5   3   51.35   17.47
  -5  -4   3   13.99   10.66
  -5   4   3   16.81   11.51
   4  -5   3   14.45    9.55
   5   4   3   25.17   11.54
   5  -4   3   26.99   11.39
  -4   5  -3    7.93    2.74
   4  -5   4  638.17   53.81
  -5  -4   4  921.98   68.70
  -4  -5   4  693.18   57.46
   5   4   4  551.74   50.46
  -5   4   4  953.88   67.41
  -4   5   4  862.99   62.54
  -5   4  -4  523.24   27.83
   5  -4   4  665.45   55.93
   4   5   4  548.26   51.45
  -5  -4   5  209.17   44.03
   5   4   5  111.29   32.58
  -4  -5   5   90.09   34.72
   4   5   5   82.41   28.05
   4  -5   5  102.61   36.15
  -4   5   5   80.39   33.99
   5  -4   5   95.04   35.04
  -5   4   5  139.77   40.37
  -5   4  -5   90.42   15.07
  -5   4   6   59.25   30.20
   4  -5   6   20.21   19.11
   5  -4   6   11.47   19.47
   4   5   6   12.70   18.21
   5   4   6   26.88   19.93
  -4  -5   6   31.71   21.30
  -5  -4   6   21.64   23.55
  -4   5   6   27.16   16.09
   5   4   7  128.63   45.56
   4   5   7  141.56   42.91
   5  -4   7  166.57   44.15
  -4   5   7  143.17   45.11
  -5  -4   7  168.60   41.52
  -5   4   7  179.33   45.84
   4  -5   7  145.85   43.73
  -4  -5   7  170.57   52.54
   4   5   8  166.92   52.43
  -4  -5   8  210.77   58.26
  -4   5   8  170.25   52.90
   4  -5   8  230.42   57.94
  -5   4   8  173.47   57.30
   5  -4   8  147.82   52.17
  -5  -4   8  157.40   50.55
   5   4   8  131.99   58.64
   4   5   9  -13.79   21.61
  -5   4   9    1.96   20.24
   5   4   9    8.44   18.61
   4  -5   9   17.01   18.23
  -4   5   9   -8.73   17.78
  -5  -4   9   32.51   31.80
   5  -4   9    0.73   20.35
  -4  -5   9  -10.17   19.32
  -4   5  10  128.02   44.90
  -5   4  10  130.56   47.91
   4  -5  10   80.14   46.13
   5  -4  10   73.05   49.52
   5   4  10   92.50   45.54
  -5  -4  10   69.29   40.79
  -4  -5  10   27.00   30.06
   4   5  10  117.89   53.89
  -5   4  11   65.02   40.82
  -5  -4  11  104.49   45.52
  -4   5  11   71.68   49.16
   4  -5  11   68.04   39.64
   5   4  11   98.16   50.97
   4   5  11  132.95   52.23
   5  -4  11   97.37   43.66
  -4  -5  11   69.43   44.44
   5  -5   0    7.09    2.34
   5   5   0    4.54    2.75
  -5   5   0    5.39    2.46
   5  -5   1 1174.91   31.55
  -5   5   1 1155.98   40.52
   5   5   1 1259.34   44.97
  -5  -5   2  566.68   34.65
  -5   5   2  464.91   32.82
   5  -5   2  521.36   31.40
  -5  -5   2  540.48   24.56
  -5   5  -2  521.47   25.13
   5   5   2  497.70   32.91
   5  -5   3  471.79   38.23
  -5   5  -3  489.96   23.50
  -5  -5   3  491.59   39.11
   5   5   3  476.89   38.56
  -5   5   3  442.61   39.07
   5  -5   4  360.29   47.86
   5   5   4  329.44   40.63
  -5   5  -4  257.95   18.89
  -5  -5   4  403.97   50.46
   5   5   5   81.40   32.42
   5  -5   5  112.84   34.09
  -5  -5   5  132.26   36.91
  -5   5  -5   81.18   11.89
  -5   5   5  158.00   38.32
  -5   5   6   -4.24   13.72
  -5  -5   6   23.14   13.77
   5   5   6   27.00   18.96
   5  -5   6   16.82   15.18
  -5   5   7  406.57   65.13
   5  -5   7  477.74   68.85
  -5  -5   7  436.47   64.97
   5   5   7  426.66   64.51
   5  -5   8  727.17   87.18
  -5  -5   8  693.24   86.18
   5   5   8  632.65   81.51
  -5   5   8  630.13   79.71
  -5  -5   9  -18.21   18.98
  -5   5   9  -22.96   26.49
   5  -5   9   14.16   23.13
   5   5   9  -19.54   28.02
  -5   5  10  125.56   52.15
   5   5  10  132.02   51.64
   5  -5  10   90.78   45.97
  -5  -5  10   89.37   44.77
  -5  -5  11  109.06   47.31
   5  -5  11   70.21   44.58
  -5   5  11   37.03   34.38
   5   5  11   77.54   44.43
  -6   0   0 6660.29   94.47
   0   6   0 6897.66   84.07
   0  -6   1    7.83    4.47
  -6   0   1    7.35    5.48
   0   6   1    5.08    4.53
   6   0   1    9.56    4.05
  -6   0  -1    8.45    3.95
  -6   0   1   11.09    6.25
   0  -6   2  103.41   14.03
   0   6   2   94.69   13.09
   6   0   2  100.92   12.71
  -6   0   2  110.03   17.11
   6   0   3   49.24   13.55
  -6   0   3   59.21   17.25
   0  -6   3   62.09   15.89
   0   6   3   46.98   11.90
   6   0   4   21.66   12.50
   0  -6   4   21.01   13.33
   0   6   4   53.57   22.93
   0   6   5    8.11    9.46
  -6   0   5  -13.46   11.04
   0  -6   5   11.80   11.00
   6   0   5  -15.48   15.69
   0  -6   6   -0.79   12.67
  -6   0   6   28.97   21.03
   0   6   6   37.08   23.18
   6   0   6    2.20   12.24
   0   6   7   14.82   17.17
  -6   0   7    2.67   17.04
   0  -6   7   22.84   21.37
   6   0   7    2.43   20.32
   0  -6   8   11.64   17.05
  -6   0   8    4.45   26.30
   0   6   8   13.23   22.82
   6   0   8   45.10   31.25
   0   6   9  -45.87   25.86
   0  -6   9  -25.16   30.93
   6   0   9    0.34   24.27
  -6   0   9    3.51   20.36
   0  -6  10   24.50   24.88
  -6   0  10   28.86   30.63
   0   6  10   50.39   21.92
   6   0  10   29.22   25.10
  -6   0  11   35.18   31.80
   6   0  11   54.03   35.18
   0   6  11   20.37   23.05
  -6  -1   0   13.55    3.28
  -6  -1   0   18.81    3.63
  -6   1   0   11.32    4.73
   1   6   0    7.71    3.44
  -1   6   0    3.18    3.24
   6   1   1   23.40    5.74
   1  -6   1   30.00    6.80
  -6  -1   1   28.88    6.95
  -6   1   1   34.68    8.93
  -6   1  -1   27.94    7.96
   1   6   1   23.73    7.67
  -6  -1   1   26.93    8.08
  -6   1   1   26.36    8.42
  -6   1  -1   26.54    5.81
  -1   6   1   35.22    8.46
  -1  -6   1   37.14    8.41
   6  -1   1   23.96    4.85
  -6  -1   2   95.91   16.76
   1   6   2   74.54   13.71
  -1  -6   2   70.07   12.78
  -6   1   2   70.92   15.19
  -1   6   2   65.36   13.53
   1  -6   2   73.37   13.41
   6   1   2   75.47   12.71
   6  -1   2   68.53   12.77
  -1  -6   3    7.57   10.44
   1  -6   3   -0.38    7.56
  -6   1   3   18.11   13.16
   6  -1   3   12.61   10.43
   1   6   3    5.35    5.92
  -1   6   3    9.87    7.76
   6   1   3    2.38    6.09
  -6  -1   3    7.39   10.90
  -6   1   4  364.98   43.71
  -6  -1   4  393.72   46.05
  -1  -6   4  193.64   32.42
   1   6   4  212.66   31.39
   6  -1   4  197.05   30.67
   6   1   4  190.88   28.48
   1  -6   4  215.74   33.68
  -1   6   4  265.34   41.11
   1  -6   5   13.98   14.47
  -6   1   5   20.77   14.09
   6   1   5   28.26   17.15
   1   6   5   13.10   13.97
   6  -1   5  -15.65   14.12
  -1   6   5   10.29   13.95
  -6  -1   5   20.74   17.96
  -1  -6   5   25.83   14.68
  -6   1   6   57.53   28.10
  -1   6   6   31.72   24.88
   1   6   6   13.04   16.57
  -6  -1   6   18.84   21.24
   1  -6   6   26.81   19.79
   6  -1   6   10.54   14.29
   6   1   6   25.68   19.59
  -1  -6   6  -13.63   20.03
   6  -1   7  -22.01   13.66
  -6  -1   7   34.03   22.48
  -6   1   7   35.60   30.05
   1  -6   7   48.70   27.75
  -1   6   7   31.55   23.98
  -1  -6   7    1.89   16.15
   6   1   7   44.07   28.61
   1   6   7   30.74   25.62
   6   1   8   36.23   29.34
   1   6   8   39.22   22.17
  -1  -6   8   14.46   21.39
  -6   1   8   51.41   31.31
   6  -1   8   38.28   33.89
  -6  -1   8   42.19   29.91
  -1   6   8   32.61   24.75
   1  -6   8   32.37   21.88
   6  -1   9   -8.59   17.86
  -6   1   9  -15.21   23.88
   1   6   9   15.84   26.46
  -6  -1   9   -5.48   20.88
  -1  -6   9  -24.31   26.06
  -1   6   9  -10.34   24.62
   1  -6   9    6.90   24.91
   6   1   9  -21.34   28.81
  -6   1  10   10.10   26.83
   1   6  10  -11.24   23.43
   6  -1  10   24.59   31.04
   6   1  10   35.06   37.30
  -1  -6  10   35.06   37.63
  -6  -1  10   26.13   32.56
  -1   6  10  -21.58   28.00
   1  -6  10  -13.48   26.56
  -1  -6  11   76.59   45.52
  -6   1  11   48.66   36.75
   1  -6  11  -41.86   35.90
  -1   6  11   26.86   22.21
   6   1  11  123.13   49.24
   1   6  11   52.53   34.81
  -6  -1  11   43.57   33.14
   6  -1  11   22.71   22.87
  -6   2   0  786.65   33.25
  -6  -2   0  632.88   22.21
   6   2   0  671.29   23.49
  -2   6   0  743.79   26.06
   2   6   0  792.03   29.60
  -6  -2   1  494.79   26.95
  -6   2  -1  447.02   25.46
  -2  -6   1  481.68   25.57
   6   2   1  522.87   23.54
  -6  -2   1  486.77   25.57
  -2   6   1  523.89   27.69
   6  -2   1  465.01   18.23
   2   6   1  479.67   28.06
  -6   2   1  473.55   27.89
   2  -6   1  451.16   22.03
  -6   2  -1  431.55   19.40
  -2   6   2   47.10   10.94
   6  -2   2   45.47    9.64
  -6  -2   2   52.54   10.14
  -2  -6   2   66.46   13.45
   6   2   2   49.59    9.05
  -6  -2   2   83.21   15.45
  -2  -6   2   48.00    5.44
  -6   2   2   68.36   14.67
   2   6   2   65.83   12.16
   2  -6   2   58.61   11.45
  -6   2  -2   55.20    9.73
  -2   6   3   10.07   10.28
   6   2   3   10.65    7.76
   2  -6   3   -5.88    6.94
   2   6   3   20.60    8.74
  -2  -6   3    9.80    6.80
   6  -2   3   10.23    7.58
  -6   2   3    0.72   12.10
  -6  -2   3   15.33   10.69
  -6  -2   4  288.42   41.06
   6   2   4  118.37   24.21
  -6   2   4  304.88   40.75
   6  -2   4  134.11   26.94
   2  -6   4  165.16   28.18
  -2   6   4  277.41   42.88
  -2  -6   4  147.17   29.90
   2   6   4  131.29   29.11
   6  -2   5  207.02   34.67
  -2   6   5  214.39   35.64
  -6   2   5  275.27   44.08
  -6  -2   5  233.39   38.23
  -2  -6   5  237.13   38.24
   2  -6   5  242.31   39.48
   6   2   5  209.24   33.33
   2   6   5  209.49   37.53
   2  -6   6   18.70   20.79
   6   2   6  -17.23   16.12
   2   6   6    2.27   17.07
   6  -2   6    2.95   11.91
  -6  -2   6   30.43   22.28
  -6   2   6  -13.78   14.28
  -2  -6   6   -5.79   15.79
  -2   6   6   32.43   24.76
   6  -2   7   32.28   27.09
   2  -6   7   30.92   26.05
  -2   6   7   20.07   22.91
  -2  -6   7   18.60   23.18
  -6   2   7   54.66   31.38
   6   2   7   20.22   24.28
   2   6   7   38.50   22.65
  -6  -2   7    3.21   19.84
   2   6   8   55.76   29.21
  -2   6   8   24.04   31.46
   6   2   8    3.83   22.89
  -6   2   8   29.72   26.27
  -6  -2   8   51.17   33.80
  -2  -6   8   52.35   27.73
   2  -6   8   50.17   34.20
   6  -2   8   14.60   22.95
   6  -2   9   11.96   18.45
   6   2   9   -9.80   19.43
  -2  -6   9    1.77   24.20
  -6   2   9    8.49   22.83
  -2   6   9    5.66   17.88
   2   6   9   10.85   18.17
  -6  -2   9  -26.67   30.41
   2  -6   9   20.69   27.74
  -6  -2  10   69.63   36.44
  -2  -6  10   44.35   35.39
   6   2  10   42.44   42.56
   6  -2  10   64.28   34.64
  -2   6  10   45.59   32.26
   2   6  10  100.91   39.77
   2  -6  10   42.87   39.71
  -6   2  10   49.27   33.16
   6   2  11  161.65   58.67
  -2  -6  11   60.39   35.42
  -6   2  11   69.33   41.23
   2  -6  11    8.21   25.49
   6  -2  11   29.76   32.36
   2   6  11  117.15   49.02
  -2   6  11   54.19   41.92
  -6  -2  11   51.67   36.35
   3   6   0    0.84    3.74
  -3   6   0   -8.44    4.56
   6   3   0   -3.81    2.60
   6  -3   1  305.84   16.40
  -6   3  -1  292.30   14.68
  -3   6   1  350.86   22.58
  -6   3   1  338.32   22.49
  -6  -3   1  373.60   22.82
   3   6   1  393.43   25.77
  -6  -3   1  282.23   21.41
   3  -6   1  313.51   17.11
  -6   3  -1  364.66   23.87
   6   3   1  356.87   21.90
  -3  -6   1  372.18   23.88
   6   3   2  394.34   26.89
  -3  -6   2  374.37   17.06
   6  -3   2  383.01   27.69
   3   6   2  381.77   29.19
  -3  -6   2  404.94   28.77
  -6  -3   2  459.27   33.09
  -3   6   2  384.18   29.17
   3  -6   2  410.54   28.05
  -6   3  -2  401.29   24.79
  -6  -3   2  382.53   23.17
  -6   3   2  316.89   30.50
  -6   3   3   45.95   19.76
   6   3   3   24.49   11.00
  -3   6   3   33.57   11.72
  -3  -6   3   39.22   14.79
   6  -3   3   21.06    9.81
   3   6   3   31.71   10.96
  -6   3  -3   23.40    6.49
  -6  -3   3   68.62   20.10
   3  -6   3   27.28   11.38
  -6  -3   4  323.11   47.36
   3   6   4  145.00   28.17
   6   3   4  118.18   24.55
  -3   6   4  317.62   43.36
  -3  -6   4  135.07   30.19
   3  -6   4  101.47   26.16
   6  -3   4  115.53   25.34
  -6   3   4  290.49   41.95
   3  -6   5   81.83   28.78
  -6   3   5  154.95   36.90
  -3   6   5  122.14   39.21
  -3  -6   5  165.04   40.11
   6  -3   5   54.42   28.29
   6   3   5   86.05   28.71
  -6  -3   5   58.87   29.76
   3   6   5   60.26   26.61
   3  -6   6   -3.52   18.04
   3   6   6   13.96   16.00
  -6  -3   6   12.18   13.25
   6  -3   6   33.44   14.33
   6   3   6   35.73   20.38
  -6   3   6   30.53   23.51
  -3  -6   6   12.11   14.08
  -3   6   6   11.86   17.19
   6   3   7  117.39   37.78
   6  -3   7  139.19   41.39
  -6   3   7   89.69   39.32
   3   6   7  144.97   41.76
  -3  -6   7  119.52   41.80
  -6  -3   7  112.08   37.38
   3  -6   7  114.31   41.29
  -3   6   7  130.55   40.27
  -6  -3   8   86.51   43.03
   3   6   8   97.28   39.97
   3  -6   8  143.23   55.83
   6   3   8   96.27   40.77
  -3   6   8   82.59   36.61
  -6   3   8   76.06   37.94
   6  -3   8  109.26   39.68
  -3  -6   8  173.97   52.53
  -6  -3   9   -2.04   23.86
   3  -6   9   -6.72   17.76
  -3   6   9    0.80   21.25
  -6   3   9   28.14   25.09
   3   6   9   -3.86   18.13
  -3  -6   9  -42.27   24.41
   6   3   9   14.16   30.30
   6  -3   9   24.33   23.27
   6  -3  10   97.81   47.00
   3   6  10   71.16   39.81
  -3  -6  10   83.68   47.24
   6   3  10  120.60   46.29
  -3   6  10   77.51   36.39
   3  -6  10   65.95   38.07
  -6   3  10   68.69   43.69
  -6  -3  10   36.33   37.02
  -6  -3  11   17.97   25.14
   3  -6  11   41.30   31.36
  -3   6  11   85.44   46.31
  -6   3  11   20.48   34.94
   6   3  11  136.84   55.39
   3   6  11   45.16   40.84
  -3  -6  11   58.77   42.98
   6  -3  11   12.20   26.60
   6   4   0   44.62    7.61
  -4   6   0   39.06    5.91
   4   6   0   43.05    8.43
   6   4   1 1475.52   45.51
   4  -6   1 1384.87   35.79
  -6   4  -1 1351.87   29.48
  -6  -4   1 1479.59   47.43
  -4  -6   1 1571.61   47.39
   4   6   1 1647.54   50.53
  -6   4  -1 1425.03   46.30
   6  -4   1 1388.48   33.86
  -4   6   1 1252.50   41.35
  -6  -4   1 1585.97   45.72
  -6   4   1 1469.61   42.17
  -6  -4   2  139.82   14.79
  -4   6   2  174.48   20.57
   4  -6   2  148.13   16.86
   4   6   2  174.21   20.76
  -6   4   2  167.22   22.12
  -6   4  -2  149.00   15.88
  -6  -4   2  207.96   22.28
   6   4   2  167.61   18.84
  -4  -6   2  128.43   11.78
  -4  -6   2  167.57   20.13
   6  -4   2  135.95   16.68
  -4   6   3   28.73   10.86
   6  -4   3   32.08   13.55
   4   6   3   42.81   13.24
  -6  -4   3   29.73   12.43
  -4  -6   3   35.91   11.51
   4  -6   3   36.82   10.25
   6   4   3   30.03   10.02
  -6   4  -3   39.35    7.70
  -6   4   3   42.04   13.30
  -6  -4   4  959.09   72.58
  -6   4  -4  913.22   40.22
  -4   6   4 1078.97   70.61
   4  -6   4  872.40   63.50
   4   6   4  701.03   58.65
  -4  -6   4  851.44   64.15
   6  -4   4  845.06   63.12
  -6   4   4 1106.09   73.22
   6   4   4  782.20   58.70
  -4   6   5 1220.53   84.67
  -4  -6   5 1263.05   85.42
  -6   4  -5 1188.13   49.01
   6  -4   5 1304.50   85.89
   6   4   5 1081.85   77.80
  -6   4   5 1093.80   86.76
   4   6   5 1155.85   78.59
   4  -6   5 1256.42   87.03
  -6  -4   5 1263.15   85.83
  -4   6   6    7.73   13.99
   6  -4   6   25.89   19.08
  -4  -6   6   38.80   22.60
   4   6   6   35.77   24.83
   6   4   6   35.62   20.94
  -6   4   6   54.87   23.99
   4  -6   6    6.40   14.83
  -6  -4   6   12.33   13.90
   6  -4   7  101.79   38.48
   4   6   7   55.49   34.12
   4  -6   7   93.06   37.27
  -4   6   7   52.89   35.71
  -6   4   7   80.42   37.37
  -4  -6   7   60.77   37.88
   6   4   7   51.70   34.30
  -6  -4   7   46.77   30.71
   4   6   8   82.80   38.49
   4  -6   8  109.02   52.51
   6  -4   8  167.28   47.85
  -6   4   8  124.48   48.14
  -4  -6   8  139.13   50.40
  -4   6   8  128.36   46.05
   6   4   8   89.59   45.63
  -6  -4   8  117.99   47.19
  -6   4   9   28.64   29.03
   4   6   9  -18.01   24.67
   6  -4   9   19.24   30.59
  -4  -6   9   29.07   26.33
  -4   6   9    9.05   24.54
   6   4   9   24.46   28.18
   4  -6   9  -11.41   22.90
  -6  -4   9   35.57   18.60
   6  -4  10  128.36   49.39
  -6  -4  10  121.58   48.62
  -4  -6  10  141.69   49.15
   6   4  10  214.62   52.23
  -4   6  10  153.73   53.35
   4   6  10  205.04   56.16
   4  -6  10  184.73   53.90
  -6   4  10  282.82   59.39
  -4  -6  11   88.28   37.83
  -6  -4  11   94.85   43.05
  -6   4  11   83.98   41.72
   4  -6  11   62.11   41.99
   4   6  11  229.42   63.01
   6   4  11  103.51   48.48
  -4   6  11  155.38   50.50
   6  -4  11  154.56   51.77
   6   5   0   10.76    5.21
  -6   5   0   10.43    3.25
   6  -5   0   10.74    2.98
   5   6   0    3.23    3.72
  -5   6   0   12.86    4.23
  -6   5   1  984.49   35.50
   6  -5   1  993.28   28.06
   5  -6   1 1016.85   30.41
  -6  -5   1 1103.54   40.24
  -5   6   1  985.90   36.05
   6   5   1 1075.90   41.05
   5   6   1 1078.63   43.09
  -5  -6   1 1133.89   42.28
   5   6   2  191.17   21.15
  -5  -6   2  204.18   15.80
  -6   5   2  177.62   21.03
  -5  -6   2  210.01   21.65
  -6   5  -2  179.78   16.35
  -5   6   2  183.36   21.11
  -6  -5   2  192.18   16.99
   6  -5   2  180.90   18.99
   5  -6   2  178.53   18.53
   6   5   2  164.21   19.85
  -6  -5   2  247.12   24.78
  -5   6  -3    5.28    3.13
  -6  -5   3    4.28    8.39
  -6   5  -3   10.88    5.25
   5  -6   3    6.99    7.26
   5   6   3   15.08    9.54
   6  -5   3   -2.76    8.18
   6   5   3   11.40    8.46
  -6   5   3   -0.11    7.07
  -5  -6   3   -3.12    8.47
  -5   6   3    7.40    9.63
   6   5   4  643.10   54.49
  -6  -5   4  782.03   62.75
   5  -6   4  637.32   62.06
  -5  -6   4  815.91   62.76
   6  -5   4  691.61   60.43
  -6   5   4  832.10   65.68
   5   6   4  590.15   54.09
  -5   6   4  945.94   69.67
  -6   5   5  319.88   48.91
   6   5   5  309.29   47.49
   6  -5   5  218.03   50.19
  -5   6   5  265.95   53.80
  -5  -6   5  359.11   57.35
   5   6   5  330.09   52.88
   5  -6   5  243.07   51.70
  -6  -5   5  333.00   49.79
   6   5   6   15.19   18.91
   5  -6   6    7.59   14.73
  -5   6   6   30.16   17.83
  -5  -6   6   16.38   19.25
   6  -5   6   28.52   19.46
  -6  -5   6    4.88   17.03
   5   6   6   22.65   19.86
  -6   5   6   18.36   18.01
  -5   6   7  127.63   41.94
  -5  -6   7  219.17   50.44
  -6  -5   7  198.53   48.94
  -6   5   7  278.18   53.35
   6  -5   7  203.03   49.88
   5  -6   7  199.65   49.89
   5   6   7  190.96   45.47
   6   5   7  182.19   50.37
   5   6   8  136.39   54.99
   5  -6   8  176.50   66.59
   6   5   8  240.48   55.16
  -5  -6   8  229.21   58.39
  -6  -5   8  202.35   57.32
  -5   6   8  144.16   63.41
  -6   5   8  208.68   58.42
   6  -5   8  205.91   55.08
   5   6   9   -7.77   26.05
  -5  -6   9  -13.70   24.96
   6  -5   9   14.29   23.64
  -6   5   9    0.63   19.25
   5  -6   9    1.27   20.64
   6   5   9   -0.87   20.32
  -5   6   9   22.61   28.85
  -6  -5   9  -20.03   26.28
  -5  -6  10  113.57   52.95
   6  -5  10  150.97   56.16
  -5   6  10  142.73   52.69
   6   5  10  132.18   53.07
  -6   5  10  151.69   53.75
  -6  -5  10  179.06   56.44
   5   6  10  111.18   47.49
   5  -6  10  138.30   47.12
  -6   5  11   65.59   38.61
   6  -5  11  120.22   52.02
   5  -6  11   81.10   46.12
   6   5  11   27.65   45.26
  -5   6  11  127.91   51.91
  -6  -5  11   20.68   31.28
  -5  -6  11  118.13   45.05
   5   6  11  107.64   50.46
  -6   6   0 1170.72   28.23
   6   6   0 1125.74   39.87
   6  -6   0 1125.31   28.14
   6  -6   1 1776.08   38.91
  -6  -6   1 1879.01   55.36
  -6   6   1 1877.92   50.23
  -6  -6   2  105.91   18.54
   6   6   2  114.96   18.28
  -6   6   2  115.20   18.53
  -6   6  -2   93.94   13.18
  -6  -6   2  102.94   13.30
   6  -6   2  102.89   14.88
  -6   6   3   42.70   13.50
  -6  -6   3   33.52    7.84
  -6  -6   3   42.31   12.63
   6  -6   3   33.49   10.12
   6   6   3   35.55   12.34
  -6   6  -3   31.52    7.02
   6   6   4 1559.93   83.00
  -6   6   4 1845.53   94.35
  -6   6  -4 1508.58   44.96
   6  -6   4 1750.03   93.03
  -6  -6   4 1794.33   91.82
  -6  -6   5 2411.65  115.81
   6  -6   5 2301.52  115.77
   6   6   5 2004.14  106.93
  -6   6   5 2004.21  112.61
  -6  -6   6  101.19   31.14
   6   6   6  108.14   31.05
   6  -6   6   90.38   27.40
  -6   6   6   77.76   26.47
   6  -6   7  110.91   39.03
   6   6   7   91.63   41.74
  -6   6   7   77.44   37.76
  -6  -6   7   87.99   41.34
  -6   6   8  190.63   52.63
   6  -6   8  127.09   49.70
   6   6   8   88.91   43.88
  -6  -6   8   62.55   41.75
  -6  -6   9   13.49   25.38
  -6   6   9   18.43   23.49
   6   6   9  -49.37   35.05
   6  -6   9  -11.27   18.59
  -6  -6  10  262.83   69.45
  -6   6  10  282.12   67.47
   6  -6  10  322.57   71.80
   6   6  10  262.56   68.27
   6  -6  11  174.80   59.78
  -6  -6  11  157.55   51.12
   6   6  11  144.95   57.62
  -6   6  11  229.68   59.04
  -7   0   0    3.78    5.83
  -7   0   0   30.21   14.49
  -7   0   0    5.87    4.23
   0   7   0   32.45   13.86
  -7   0   1   30.68    8.42
   7   0   1   25.79    5.80
  -7   0  -1   36.62    9.47
   0   7   1   21.83    8.35
  -7   0   1   28.79    7.92
   0  -7   1   32.01    8.04
   7   0   2   18.18    6.25
   0   7   2   13.81    6.59
   0  -7   2   18.37    7.10
  -7   0   2   26.77    9.27
   0  -7   3  128.63   20.36
   0   7   3  114.02   19.91
  -7   0   3   98.22   19.20
   7   0   3   93.28   16.43
   0   7   4  174.31   31.64
   0  -7   4  127.99   25.97
   7   0   4  143.75   26.04
   0   7   5    6.61   10.36
   0  -7   5   13.71   19.27
   7   0   5   10.15   12.41
  -7   0   5    5.91   15.41
   0   7   6   15.56   17.85
   0  -7   6   21.35   18.50
  -7   0   6   -4.03   15.34
   7   0   6    5.25   15.70
   0   7   7   -2.05   18.77
  -7   0   7  -10.01   13.95
   7   0   7   31.19   24.22
   0  -7   7    9.00   20.13
   0   7   8    4.75   21.20
   7   0   8   10.20   18.84
  -7   0   8   15.99   23.58
   0  -7   8    5.74   18.85
   0  -7   9   -0.81   23.63
  -7   0   9    3.30   17.71
   7   0   9   41.42   24.71
   0   7   9   -2.19   19.67
   0  -7  10   -2.14   27.12
  -7   0  10   33.16   31.86
   0   7  10  -16.62   27.29
   7   0  10    7.04   26.15
   0  -7  11  -31.95   37.07
  -7   0  11   22.61   34.99
   0   7  11   18.76   31.79
   7   0  11   30.77   32.29
  -1   7   0   16.55    6.64
  -7  -1   0   19.94    3.91
   1   7   0   21.11    5.90
  -7  -1   0   22.86    4.40
  -7   1   0   20.87    7.46
  -7  -1   0   29.15    8.23
   7   1   1   40.48    7.12
  -7   1   1   36.79    8.94
  -7   1  -1   37.38   10.23
   1   7   1   29.89    8.45
  -7   1   1   41.00   10.60
  -1  -7   1   46.04   10.09
  -1   7   1   37.10    8.75
  -7  -1   1   41.75   10.66
   7  -1   1   33.46    5.68
  -7  -1   1   42.26    8.29
  -7   1  -1   50.54    7.65
   1  -7   1   42.70    8.36
   1  -7   2 1296.63   50.10
  -7  -1   2 1400.64   57.97
  -1  -7   2 1298.12   51.85
  -7   1   2 1254.16   58.25
   7  -1   2 1214.29   45.07
   1   7   2 1286.07   53.67
   7   1   2 1240.61   46.70
  -1   7   2 1146.71   50.74
  -7   1   3   72.51   18.07
  -7  -1   3   69.87   16.00
   1  -7   3   67.17   15.65
   7   1   3   65.38   15.02
   1   7   3   77.24   18.05
  -1   7   3   72.18   17.05
   7  -1   3   66.70   15.37
  -1  -7   3   81.12   16.83
  -1   7   4  249.97   39.48
   1  -7   4  223.82   33.33
   7   1   4  172.88   28.43
  -7  -1   4  402.04   49.83
  -1  -7   4  219.02   32.15
  -7   1   4  399.50   47.65
   1   7   4  249.34   34.44
   7  -1   4  192.34   30.54
   7   1   5   20.76   15.62
   1   7   5   -1.97   12.50
   7  -1   5    9.53   13.20
   1  -7   5   13.49   14.69
  -7   1   5   17.81   14.70
  -1   7   5   18.72   16.84
  -7  -1   5    3.91   11.73
  -1  -7   5   -5.17   11.67
  -1  -7   6   21.89   17.17
  -1   7   6   10.05   15.79
   1   7   6   16.29   17.57
   7   1   6   27.96   22.09
   7  -1   6   11.71   12.48
   1  -7   6   11.81   15.74
  -7   1   6   37.57   24.87
  -7  -1   6   25.40   23.61
  -7   1   7   60.80   33.47
  -7  -1   7   29.29   27.15
  -1  -7   7   16.22   21.24
   1   7   7   40.07   21.03
   1  -7   7   12.31   21.46
   7   1   7   43.47   25.02
   7  -1   7   43.76   25.96
  -1   7   7   42.04   19.19
  -1  -7   8   31.59   26.28
   7  -1   8   61.54   35.87
   1   7   8   48.74   29.68
   7   1   8   89.86   37.66
  -7  -1   8   67.27   31.63
  -7   1   8   52.21   34.80
  -1   7   8   59.79   33.85
   1  -7   8   57.13   27.79
  -7  -1   9    3.05   19.94
  -7   1   9   14.28   24.27
   7  -1   9   -7.30   22.21
   1  -7   9   16.74   21.97
   1   7   9    3.92   25.45
   7   1   9  -31.24   27.79
  -1   7   9   44.52   20.29
  -1  -7   9   -0.29   19.89
   1   7  10  -24.03   24.75
  -1  -7  10   32.67   32.91
   7  -1  10  -24.23   33.04
   7   1  10   15.29   21.91
  -7   1  10   30.28   33.01
  -1   7  10   21.07   26.19
   1  -7  10  -10.60   26.99
  -7  -1  10   28.44   33.19
   1  -7  11  -49.79   39.07
  -7  -1  11  -54.53   32.19
   1   7  11   43.77   37.74
  -1   7  11  -38.68   27.52
  -7   1  11   21.49   32.65
   7  -1  11  -28.60   30.09
   7   1  11    5.75   23.17
  -7   2   0    7.27    6.51
  -7  -2   0    5.62    4.34
   7   2   0    0.65    2.68
  -2   7   0   -2.49    3.38
  -2  -7   1  170.46   16.92
   2  -7   1  123.22   13.22
   7   2   1  153.08   13.54
  -7   2   1  137.12   15.86
  -7   2  -1  135.53   10.90
   2   7   1  175.11   17.98
  -7  -2   1  178.65   18.77
   7  -2   1  140.18    9.65
  -7   2  -1  140.36   17.51
  -2   7   1  137.38   15.72
  -7  -2   1  166.10   15.50
  -2   7   2  216.66   22.29
  -7  -2   2  218.27   22.67
   7   2   2  201.54   19.94
   2  -7   2  191.65   20.64
  -7   2  -2  185.57   17.98
  -7   2   2  201.04   25.39
  -2  -7   2  218.40   22.56
   2  -7   2  197.71   12.68
   7  -2   2  190.61   18.72
  -7  -2   2  196.47   18.68
   2   7   2  211.99   22.40
  -2  -7   3   30.85   13.96
   2  -7   3   14.48    9.70
   7  -2   3   18.86    9.99
  -7   2   3    0.93    8.65
   7   2   3   12.67    9.44
  -7  -2   3   36.77   13.96
   2   7   3   18.60   10.58
  -2   7   3   13.80    7.02
   2   7   4  195.30   30.61
  -7   2   4  326.80   43.44
   7   2   4  200.82   30.11
  -2   7   4  338.33   42.67
  -7  -2   4  324.13   44.30
   2  -7   4  165.63   28.91
  -2  -7   4  207.73   31.36
   7  -2   4  164.66   29.37
  -2  -7   5   20.47   24.79
   7  -2   5   34.42   22.98
   2  -7   5   43.59   24.00
  -7   2   5   53.36   31.08
   2   7   5   45.11   22.88
  -7  -2   5   81.43   32.35
  -2   7   5   22.33   21.31
   7   2   5   53.29   21.80
   7  -2   6   18.66   19.32
   2   7   6   12.57   13.34
   7   2   6    5.68   15.43
  -2   7   6   -8.13   17.24
  -7  -2   6    7.06   19.00
   2  -7   6   11.66   20.61
  -2  -7   6   -7.35   12.72
  -7   2   6   43.75   22.19
   7  -2   7   28.57   20.04
  -2   7   7   31.02   24.47
   2   7   7   59.34   29.56
  -2  -7   7   88.27   34.35
  -7  -2   7   36.17   30.79
   7   2   7   43.82   28.27
   2  -7   7   77.56   29.96
  -7   2   7  107.21   39.22
   7  -2   8   84.56   37.42
  -7  -2   8   58.39   33.46
   2   7   8   40.77   30.70
   2  -7   8   70.21   33.22
  -7   2   8   42.30   30.39
  -2   7   8   51.25   33.72
  -2  -7   8   78.46   38.64
   7   2   8   58.84   38.38
   2  -7   9   12.03   22.40
   7  -2   9    2.32   18.97
  -2   7   9   21.06   28.46
  -2  -7   9    8.66   18.08
  -7   2   9   19.50   24.75
  -7  -2   9   11.52   26.63
   2   7   9  -39.47   29.36
   7   2   9  -25.68   24.60
   7  -2  10    9.85   23.84
   2   7  10   52.47   38.87
  -2  -7  10   79.36   41.63
   7   2  10   43.12   31.01
  -2   7  10   21.56   32.47
  -7  -2  10   10.59   26.72
  -7   2  10   36.06   34.30
   2  -7  10   73.42   44.22
  -2  -7  11   38.41   37.76
  -7   2  11    0.07   28.44
  -7  -2  11   20.35   29.79
   2   7  11   41.99   33.28
  -2   7  11   34.48   34.30
   7  -2  11  -23.51   28.79
   2  -7  11   12.67   26.19
   7   2  11   63.34   40.07
   7   3   0    6.97    3.35
  -3   7   0    0.52    2.25
   3   7   0    3.07    3.38
  -7   3   1  170.68   17.72
  -3   7   1  203.96   18.30
  -3  -7   1  254.97   20.71
   7  -3   1  176.14   11.56
  -7   3  -1  234.90   20.99
   3  -7   1  216.98   15.89
  -7  -3   1  181.72   19.08
   7   3   1  213.10   16.69
  -7  -3   1  270.71   20.24
   3   7   1  196.89   19.95
  -7   3  -1  179.32   11.40
  -7  -3   2  894.77   46.06
  -3  -7   2  915.73   44.73
  -7   3  -2  902.60   39.93
   7  -3   2  807.67   39.02
   3  -7   2  846.21   41.09
  -7   3   2  863.74   48.56
  -3   7   2  891.13   45.03
  -7  -3   2  883.80   38.09
   7   3   2  864.28   40.31
   3   7   2  894.53   45.90
  -7   3   3  157.36   26.83
   7   3   3  169.39   23.02
   7  -3   3  160.91   23.72
   3  -7   3  166.58   24.39
   3   7   3  157.99   23.41
  -7  -3   3  183.10   26.02
  -3   7   3  162.70   23.32
  -7   3  -3  150.22   17.51
  -3  -7   3  180.72   24.34
   7  -3   4  196.90   30.62
   3   7   4  195.58   33.08
  -3  -7   4  238.32   33.35
  -3   7   4  324.08   42.35
   7   3   4  182.55   29.31
   3  -7   4  173.22   31.66
  -7   3   4  283.63   40.99
  -7   3  -4  155.74   18.86
  -7  -3   4  285.63   40.94
  -3  -7   5   58.72   27.34
  -7  -3   5   57.45   26.73
  -7   3   5   40.62   27.13
   7  -3   5   55.25   25.66
   3  -7   5   16.89   21.40
   7   3   5   22.21   22.61
  -3   7   5   49.79   25.07
   3   7   5   38.10   24.00
   7  -3   6   30.75   16.32
   3  -7   6   25.00   21.71
  -7   3   6   20.28   21.29
  -7  -3   6   51.74   26.24
   7   3   6   13.11   18.98
  -3  -7   6   15.93   18.02
  -7   3  -6    6.86    8.15
   3   7   6    8.81   15.90
  -3   7   6   48.08   21.22
  -3   7   7  204.23   49.34
   3  -7   7  231.11   51.78
  -7   3   7  240.80   53.99
  -3  -7   7  248.02   49.55
  -7  -3   7  237.67   52.52
   7   3   7  222.32   47.46
   7  -3   7  266.07   49.65
   3   7   7  221.32   51.80
  -7  -3   8  297.86   58.95
   3   7   8  306.48   60.89
  -7   3   8  252.41   58.35
   7  -3   8  278.25   52.03
   7   3   8  286.44   57.50
  -3   7   8  235.95   51.91
   3  -7   8  254.97   54.48
  -3  -7   8  287.47   61.17
  -3  -7   9   47.36   34.33
   7  -3   9    3.00   19.63
  -7   3   9    0.06   22.81
  -3   7   9    1.91   18.89
   3   7   9   20.06   21.93
   7   3   9   -7.77   18.45
   3  -7   9   50.19   33.76
  -7  -3   9   43.15   28.17
  -3   7  10   72.84   35.13
  -7   3  10   44.42   37.68
   3  -7  10   69.59   41.63
  -7  -3  10   93.37   46.22
   7   3  10   17.75   40.42
   7  -3  10   60.49   40.44
  -3  -7  10   91.90   47.81
   3   7  10   80.26   48.30
   3   7  11   49.97   35.43
   3  -7  11   84.84   44.42
  -7  -3  11   37.78   35.59
  -3  -7  11   34.83   31.11
  -7   3  11   44.33   31.93
  -3   7  11   36.07   38.53
   7   3  11  111.92   52.13
   7  -3  11   26.24   32.41
  -4   7   0    0.13    2.36
   7   4   0   -1.86    2.67
  -7  -4   1  422.49   24.98
  -7   4   1  319.51   20.78
  -7   4  -1  345.59   15.12
  -4  -7   1  423.56   26.78
   7  -4   1  298.62   15.58
   4  -7   1  309.77   18.63
  -7   4  -1  332.56   24.32
  -4   7   1  352.90   23.55
  -7  -4   1  371.49   25.55
   4   7   1  358.38   26.02
   7   4   1  366.09   22.92
  -4  -7   2  495.39   33.51
  -7   4  -2  382.35   26.28
  -7   4   2  421.32   33.32
  -7  -4   2  397.60   26.09
   7   4   2  424.60   30.30
   7  -4   2  400.95   28.35
   4   7   2  409.96   31.54
   4  -7   2  403.23   28.64
  -7  -4   2  482.36   33.08
  -4   7   2  428.60   33.23
   4  -7   3   67.23   14.92
  -7  -4   3   59.12   15.87
  -7   4  -3   46.56    8.70
  -4  -7   3   50.19    6.70
  -7   4   3   46.73   17.80
  -4   7   3   45.89   12.74
   4   7   3   47.12   12.64
   7  -4   3   38.77   12.20
  -4  -7   3   66.91   14.54
   7   4   3   42.32   13.06
  -7   4  -4  579.00   34.87
  -7   4   4  664.42   60.24
  -4   7   4  800.68   60.62
   4   7   4  637.42   52.86
   4  -7   4  625.02   53.88
   7  -4   4  643.22   53.60
  -7  -4   4  778.17   62.67
  -4  -7   4  695.25   57.28
   7   4   4  628.91   51.09
  -7   4  -5  116.84   19.57
   4   7   5  174.57   37.54
  -4   7   5  142.59   41.15
  -4  -7   5  159.57   39.43
   7   4   5  169.90   36.37
  -7   4   5  191.28   45.40
   7  -4   5  124.87   38.22
  -7  -4   5  185.24   43.44
   4  -7   5  144.62   36.16
   7   4   6   18.76   22.61
   4  -7   6   18.90   14.30
  -4   7   6   26.11   23.30
  -7   4   6   -5.23   17.94
  -4  -7   6    3.07   12.29
   4   7   6   16.67   19.95
   7  -4   6    2.47   15.71
  -7  -4   6   52.46   26.77
   4  -7   7  196.88   46.55
   4   7   7  103.39   41.57
  -4   7   7  177.87   48.26
   7   4   7  158.27   44.79
  -4  -7   7  142.72   46.90
  -7  -4   7  111.40   37.47
   7  -4   7  114.33   47.80
  -7   4   7  122.09   44.25
   4  -7   8  160.57   47.63
   7   4   8  136.32   59.96
  -7  -4   8  183.91   51.85
   4   7   8  130.15   44.78
   7  -4   8  127.93   50.35
  -4   7   8  148.37   53.80
  -7   4   8  154.78   51.94
  -4  -7   8  167.32   50.51
   4  -7   9    5.55   18.52
   7  -4   9  -16.52   25.57
  -4   7   9   26.67   19.36
  -4  -7   9  -34.79   21.64
   7   4   9   43.02   26.63
  -7  -4   9   42.71   31.40
   4   7   9    5.35   27.42
  -7   4   9   35.93   30.34
   4  -7  10   -6.81   28.05
  -7   4  10  133.14   47.27
   4   7  10  116.98   50.10
  -4   7  10  103.80   51.50
  -7  -4  10  124.77   51.45
   7   4  10  137.85   50.07
  -4  -7  10   83.33   49.74
   7  -4  10   73.03   38.24
  -7   4  11   52.71   44.16
   7  -4  11   82.91   45.86
  -7  -4  11    7.64   27.90
   4   7  11   95.63   51.87
   4  -7  11   71.43   41.05
  -4   7  11  110.73   50.79
  -4  -7  11   10.16   36.08
   7   4  11  107.78   51.05
   5   7   0   14.38    5.38
  -7   5   0   11.59    2.75
   7   5   0    7.10    3.68
  -5   7   0   13.24    3.41
   7  -5   0   13.74    3.32
  -7   5   1  213.11   17.28
   7   5   1  259.24   21.20
   5   7   1  280.58   24.38
  -5   7   1  253.09   19.71
   5  -7   1  225.21   15.19
   7  -5   1  229.96   13.66
  -5  -7   1  310.51   25.07
  -7   5  -1  211.46   12.05
  -7   5  -1  259.91   22.37
  -7  -5   1  333.66   23.49
  -5   7   2  929.60   46.88
   5   7   2  874.10   46.24
  -7   5   2  886.15   48.35
   7  -5   2  854.24   41.16
  -7  -5   2  883.93   37.46
  -7   5  -2  860.60   39.74
   5  -7   2  930.97   41.79
   7   5   2  879.51   43.56
  -7  -5   2  919.51   46.58
  -5  -7   2  936.55   34.91
  -5  -7   2  952.55   47.26
  -7   5   3   24.44   14.11
  -5  -7   3   25.78    5.55
   7  -5   3   26.14    9.78
  -7   5  -3   34.48    8.51
  -5  -7   3   28.53   13.62
   5  -7   3   27.89    8.67
   7   5   3   22.82    8.06
  -7  -5   3   43.53   14.65
  -5   7   3   27.00   10.53
  -7  -5   3   32.27    8.10
   5   7   3   32.14   12.08
  -7   5  -4  419.63   29.12
  -5  -7   4  622.14   58.53
  -5   7   4  747.73   60.87
   5   7   4  595.66   56.41
   5  -7   4  535.82   55.26
   7   5   4  530.68   52.19
  -7  -5   4  564.26   55.09
   7  -5   4  560.36   53.12
  -7   5   4  546.14   60.84
  -7   5  -5   79.91   14.67
  -5   7   5   77.31   36.43
  -7   5   5   90.23   40.41
   5   7   5  116.92   36.43
   5  -7   5  121.02   36.72
  -7  -5   5  133.73   41.55
   7  -5   5  150.62   38.96
  -5  -7   5  137.33   38.85
   7   5   5  108.45   35.66
  -7   5   6   19.01   20.83
   5   7   6   40.19   19.98
  -5  -7   6   14.99   20.67
   7   5   6   11.34   16.87
   7  -5   6   46.70   25.42
  -5   7   6   38.11   30.72
   5  -7   6   -6.44   12.56
  -7  -5   6   22.68   18.91
  -5  -7   7  397.10   64.93
  -7  -5   7  426.12   64.84
  -5   7   7  376.89   60.95
   7  -5   7  361.50   62.91
   5   7   7  367.14   61.62
   5  -7   7  472.49   66.11
   7   5   7  342.40   63.99
  -7   5   7  369.04   66.25
  -7  -5   8  495.32   76.40
  -5  -7   8  492.39   76.67
  -5   7   8  499.34   77.38
   5   7   8  506.59   75.56
   7  -5   8  557.58   76.86
  -7   5   8  498.16   74.71
   7   5   8  589.11   76.16
   5  -7   8  568.30   79.64
   5  -7   9    8.52   18.08
  -7  -5   9   52.23   36.01
  -7   5   9   19.22   28.03
   7   5   9   28.52   29.47
  -5   7   9    8.61   19.28
   5   7   9   37.27   32.91
   7  -5   9    8.03   25.35
  -5  -7   9  -12.21   28.91
   7  -5  10   49.87   41.94
   5  -7  10   18.83   25.01
  -7  -5  10  142.39   51.77
   7   5  10   69.45   36.42
  -5   7  10  147.64   52.17
  -7   5  10  113.94   51.98
  -5  -7  10  166.73   55.51
   5   7  10  119.61   44.65
  -7   5  11  129.84   45.16
  -5  -7  11   22.72   27.49
  -5   7  11   78.57   41.45
   7  -5  11  116.76   50.05
   5   7  11  114.98   50.15
   5  -7  11   82.34   46.09
  -7  -5  11   52.40   40.39
   7   5  11   72.28   39.38
   7   6   0   -2.18    4.15
  -6   7   0    3.69    2.11
   6   7   0    9.25    6.75
  -7   6   0    3.27    2.93
   7  -6   0    2.19    1.68
  -6  -7   1  609.32   34.08
  -7   6   1  595.47   28.18
   7   6   1  534.27   30.89
  -7  -6   1  678.34   34.72
   7  -6   1  551.50   20.87
   6  -7   1  513.83   21.98
  -6   7   1  595.53   28.82
   6   7   1  627.58   34.51
  -7  -6   2   85.49   17.18
   7  -6   2   28.40    9.25
   6   7   2   44.19   14.80
  -7   6  -2   32.76   10.27
   7   6   2   58.59   14.80
  -6  -7   2   25.08    7.86
  -7  -6   2   47.64   11.04
   6  -7   2   38.86   11.68
  -6   7   2   41.71   16.06
  -7   6   2   49.10   12.46
  -6  -7   3   31.14    7.67
  -7   6   3   53.29   17.11
  -6   7   3   60.54   16.93
   6  -7   3   40.68   14.24
   6   7   3   45.03   13.59
  -7  -6   3   41.63    9.30
  -7   6  -3   37.21    8.62
  -7  -6   3  115.90   23.58
   7  -6   3   40.53   11.89
   7   6   3   47.13   14.66
  -6  -7   3  101.62   22.51
  -6  -7   4 1755.53   89.00
  -7   6  -4 1323.72   47.02
   6  -7   4 1522.39   88.61
   7   6   4 1527.69   84.02
  -6   7   4 1423.56   83.03
  -7   6   4 1532.66   89.85
   7  -6   4 1621.64   87.05
  -7  -6   4 1712.71   90.24
   6   7   4 1568.42   83.89
   7  -6   5  262.99   50.17
  -7   6   5  385.95   61.98
  -7  -6   5  334.15   56.82
   7   6   5  255.88   46.38
  -6   7   5  231.10   42.78
   6  -7   5  211.22   47.38
  -6  -7   5  322.69   50.16
   6   7   5  220.17   47.60
  -7   6  -5  194.16   20.10
  -7  -6   6   44.98   26.87
  -6  -7   6   38.42   26.61
   6   7   6   35.19   21.29
   7  -6   6   14.55   24.42
   7   6   6   29.84   26.31
  -6   7   6   22.21   22.34
   6  -7   6   -8.84   16.04
  -7   6   6   23.43   26.30
   7  -6   7  211.58   45.59
   7   6   7  189.70   49.42
  -7   6   7  115.08   44.31
   6  -7   7  179.14   45.83
  -6  -7   7  237.35   56.02
  -6   7   7  162.24   46.75
   6   7   7  167.66   46.82
  -7  -6   7  184.62   48.22
   7  -6   8  179.68   63.27
   6  -7   8  209.76   54.86
   7   6   8   99.94   54.66
  -7   6   8  124.10   54.16
  -7  -6   8  141.22   52.65
   6   7   8  191.24   51.35
  -6  -7   8  171.31   50.37
  -6   7   8  138.68   48.43
   6  -7   9   -6.34   18.91
  -6   7   9   14.53   22.58
  -6  -7   9    8.45   17.16
  -7   6   9    6.26   25.18
   7  -6   9   24.68   24.98
  -7  -6   9  -28.07   25.28
   7   6   9  -11.63   24.43
   6   7   9  -10.45   22.52
  -6  -7  10  139.69   59.43
   6  -7  10  202.47   56.97
   7   6  10  145.47   53.31
   6   7  10  152.07   52.66
   7  -6  10  221.31   60.75
  -6   7  10  169.53   58.09
  -7  -6  10   65.98   43.58
  -7   6  10  263.63   65.45
  -7   6  11   91.12   55.49
   6  -7  11  105.34   57.54
   6   7  11   73.33   48.37
   7   6  11  107.72   47.76
   7  -6  11  135.40   55.89
  -7  -6  11   81.53   52.36
  -6  -7  11   89.89   51.64
  -6   7  11  158.99   59.00
  -7   7   0   17.65    3.52
   7   7   0   23.80    6.57
   7  -7   1  631.30   23.61
   7   7   1  735.69   37.04
  -7  -7   1  752.77   36.72
  -7   7   1  635.56   29.69
  -7   7   2 1528.67   59.78
  -7  -7   2 1694.58   63.40
   7  -7   2 1492.48   53.85
  -7  -7   2 1505.46   50.65
   7   7   2 1478.23   59.82
   7  -7   3  326.12   34.08
   7   7   3  361.48   34.49
  -7  -7   3  326.66   22.83
  -7  -7   3  376.62   40.52
  -7   7   3  339.44   34.47
  -7   7  -3  304.44   23.77
  -7  -7   4 1470.35   88.27
  -7   7   4 1615.66   90.91
   7   7   4 1658.89   82.61
   7  -7   4 1516.80   86.52
  -7   7   5   99.44   38.62
  -7  -7   5  116.61   38.16
   7   7   5  124.84   34.96
   7  -7   5  135.50   37.20
   7  -7   6   93.86   32.77
   7   7   6   34.88   26.24
  -7   7   6   68.98   29.99
  -7  -7   6   52.60   25.82
  -7   7   7  348.03   60.30
  -7  -7   7  366.13   61.00
   7  -7   7  353.02   60.96
   7   7   7  336.34   60.13
  -7  -7   8  451.92   75.77
   7  -7   8  470.01   70.07
   7   7   8  445.79   66.95
  -7   7   8  378.70   69.54
  -7  -7   9   -3.60   21.57
   7   7   9  -16.53   25.86
   7  -7   9   21.36   22.16
  -7   7   9   50.60   33.59
   7  -7  10  119.46   47.02
  -7   7  10  117.66   50.76
  -7  -7  10  137.53   49.37
   7   7  10  103.84   45.56
  -7   7  11  126.31   45.91
  -7  -7  11   95.44   48.97
   7  -7  11  116.65   48.42
   7   7  11   32.63   46.00
   0   8   0  421.65   23.84
  -8   0   0  397.61   14.81
  -8   0   0  364.71   14.98
   0  -8   1   40.72    9.25
  -8   0   1   35.28    9.98
   8   0   1   31.43    5.66
  -8   0   1   37.63    7.67
  -8   0  -1   26.72    8.60
   0   8   1   36.52    8.50
   0   8   2   49.82   10.90
   8   0   2   39.41    8.53
   0  -8   2   39.93   11.02
  -8   0   2   40.15   11.14
   0   8   3   -1.92    5.81
  -8   0   3    1.61    7.63
   8   0   3    5.48    4.92
   0  -8   3    7.22    8.11
   0   8   4  205.55   31.90
   8   0   4  177.90   27.90
  -8   0   4  290.09   41.20
   0  -8   4  199.21   32.18
   8   0   5   61.65   20.22
   0   8   5   41.42   15.98
  -8   0   5   39.82   22.14
   0  -8   5   90.15   25.81
  -8   0   6  187.41   41.80
   0   8   6  103.76   29.90
   0  -8   6  159.66   35.75
   8   0   6  102.40   30.06
   0   8   7    0.60   16.86
   8   0   7   30.93   23.09
   0  -8   7    3.95   14.84
  -8   0   7   -1.56   20.75
  -8   0   8    8.89   22.87
   8   0   8   49.37   23.98
   0  -8   8   32.78   18.62
   0   8   8   17.31   23.28
   0  -8   9    1.39   18.77
   0   8   9   60.73   32.59
   8   0   9  -22.19   24.79
  -8   0   9   25.45   30.91
   8   0  10  -13.45   26.95
  -8   0  10   30.98   35.02
   0  -8  10   36.56   25.80
   0   8  10   53.25   32.18
   8   0  11  -38.81   29.19
   0   8  11   40.60   35.21
   0  -8  11   62.67   35.67
  -8   0  11   35.93   29.14
  -1   8   0   67.24   10.82
  -8  -1   0   73.13    8.02
   1   8   0   66.85   11.74
  -8   1   0   86.06   14.34
  -8  -1   0   88.48   14.18
  -8  -1   1  208.32   16.78
  -8  -1   1  208.26   19.68
   1   8   1  189.39   18.52
   1  -8   1  210.47   18.30
   8  -1   1  200.61   12.06
  -1   8   1  195.02   18.18
  -1  -8   1  193.34   18.34
  -8   1  -1  235.08   21.19
  -8   1   1  187.54   17.02
  -8   1  -1  210.22   12.69
   8   1   1  190.52   13.57
  -8   1   1  208.94   20.96
  -8  -1   2  527.79   37.49
   8   1   2  449.16   28.09
  -1   8   2  447.69   33.03
  -8   1  -2  409.65   28.84
   1   8   2  449.69   33.33
   8  -1   2  436.03   26.25
   1  -8   2  421.59   29.06
  -1  -8   2  476.87   31.33
  -8  -1   2  453.59   30.82
  -8   1   2  424.60   35.17
   8  -1   3   63.56   13.71
   1   8   3   66.87   16.56
   1  -8   3   66.33   14.31
  -1   8   3   78.96   16.62
  -8   1   3   66.40   19.31
  -1  -8   3   66.55   14.08
   8   1   3   74.12   15.35
  -8  -1   3  137.79   28.13
  -1  -8   4  131.28   28.15
  -8   1   4  163.58   36.35
   8  -1   4  124.63   25.91
  -1   8   4  145.43   28.51
  -8  -1   4  238.19   38.95
   8   1   4  102.18   22.72
   1  -8   4  116.12   26.72
   1   8   4  107.52   25.41
  -1   8   5   16.25   16.39
  -8   1   5   42.76   23.11
  -8  -1   5   18.15   14.99
   1  -8   5   34.22   19.19
   8  -1   5   46.16   19.05
   1   8   5   23.22   19.75
  -1  -8   5   25.14   19.09
   8   1   5   35.64   17.51
   8   1   6   56.30   25.03
   1  -8   6   51.83   22.61
  -1  -8   6   62.82   27.31
   8  -1   6   35.43   19.17
  -8  -1   6   74.80   29.74
   1   8   6   37.91   21.83
  -8   1   6   36.62   26.10
  -1   8   6   43.31   21.28
   8  -1   7   57.90   29.40
   1   8   7    6.51   15.91
  -8   1   7   36.88   28.23
   1  -8   7   14.18   16.90
   8   1   7   12.08   21.46
  -8  -1   7    9.45   25.06
  -1   8   7   20.05   21.10
  -1  -8   7   32.70   25.23
  -8   1   8   85.06   41.53
   8   1   8   30.45   25.94
   1  -8   8   70.77   34.82
  -8  -1   8   29.22   28.21
  -1  -8   8   22.45   18.40
   1   8   8   34.47   26.63
  -1   8   8   61.19   36.35
   8  -1   8   -7.77   19.67
   1  -8   9   28.06   29.37
  -8  -1   9   48.49   29.81
  -8   1   9   49.45   38.55
  -1  -8   9   34.20   27.70
  -1   8   9   45.99   38.06
   8   1   9   55.19   35.62
   8  -1   9   33.39   31.75
   1   8   9  -63.64   38.73
  -1  -8  10   26.80   29.90
   1   8  10   36.81   34.75
  -1   8  10   42.45   32.60
  -8  -1  10   50.19   34.74
   8   1  10   29.31   30.38
  -8   1  10   22.34   32.24
   1  -8  10    2.30   23.46
   8  -1  10   43.28   29.57
  -1  -8  11   52.01   43.50
   8   1  11    0.75   30.75
  -8   1  11   16.64   29.80
   1  -8  11   -4.48   25.47
  -8  -1  11   -1.04   29.75
  -1   8  11    1.77   27.49
   1   8  11   -3.04   30.49
   8  -1  11   -6.81   33.21
   2   8   0 2058.10   56.30
  -8   2   0 2155.48   64.77
  -8  -2   0 2289.71   64.42
  -2   8   0 2267.78   53.96
  -8  -2   0 2233.52   45.14
   8   2   0 2134.63   44.36
  -8  -2   1  423.36   27.84
   2  -8   1  425.96   24.47
  -8  -2   1  379.86   23.98
  -8   2  -1  316.18   25.30
   8  -2   1  395.26   15.10
   8   2   1  419.21   21.13
  -2  -8   1  408.14   26.20
  -8   2  -1  403.58   18.09
  -8   2   1  370.68   25.18
   2   8   1  447.22   28.55
  -2   8   1  446.65   27.23
   8   2   2  168.33   17.84
  -8  -2   2  135.82   19.74
  -8   2  -2  171.33   18.07
   2  -8   2  159.02   19.24
  -8  -2   2  171.44   18.36
   2   8   2  172.74   21.15
  -2   8   2  173.06   20.70
   8  -2   2  158.81   16.93
  -2  -8   2  165.04   20.32
  -8   2   2  179.66   23.13
  -2  -8   3   34.32   12.21
  -8   2  -3   11.28    5.12
   2   8   3   22.89   11.10
   2  -8   3   11.69    8.26
  -8  -2   3   41.65   15.95
  -2   8   3    4.33    9.19
  -8   2   3   17.02    9.31
   8   2   3   12.53    6.82
   8  -2   3   18.83    7.44
  -2  -8   4  113.98   24.40
   8  -2   4  103.55   23.37
  -8   2   4  137.81   32.35
  -8  -2   4  166.39   32.94
   2  -8   4   88.57   22.01
   8   2   4  104.89   22.73
  -2   8   4  131.88   27.02
   2   8   4  117.23   24.62
   8   2   5  346.51   42.58
  -8   2   5  365.20   46.99
  -2  -8   5  360.45   45.85
   2   8   5  393.82   45.87
   2  -8   5  340.03   44.81
   8  -2   5  329.71   44.12
  -8  -2   5  368.26   49.26
  -2   8   5  363.16   48.29
  -2  -8   6  148.80   36.02
   2   8   6  119.30   35.76
  -2   8   6  178.72   37.98
   8  -2   6  137.08   33.06
  -8   2   6  157.20   40.29
   2  -8   6  144.10   32.05
  -8  -2   6  186.42   39.92
   8   2   6  141.71   32.27
   8  -2   7   23.88   21.51
  -8   2   7   52.65   32.73
   2   8   7   55.39   23.88
   2  -8   7   27.55   24.20
  -8  -2   7   62.91   31.24
  -2  -8   7   52.58   27.46
  -2   8   7   26.29   23.14
   8   2   7   60.08   29.49
  -8  -2   8   60.15   31.56
  -8   2   8   13.78   25.33
   8   2   8  108.34   39.81
   8  -2   8   33.86   27.31
  -2  -8   8   25.88   24.75
   2  -8   8   60.72   36.43
   2   8   8   75.43   34.13
  -2   8   8   53.33   31.52
  -2  -8   9   85.81   38.35
   2  -8   9   27.29   26.55
  -2   8   9   44.27   36.19
   8  -2   9   23.67   26.00
  -8  -2   9   24.01   25.77
   2   8   9   27.98   26.25
   8   2   9   14.01   26.48
  -8   2   9   35.37   26.15
  -8  -2  10   63.54   41.20
   8  -2  10   94.65   42.00
  -2  -8  10   84.19   33.97
  -2   8  10   50.55   30.07
   2   8  10   57.97   32.95
   8   2  10   21.27   20.34
   2  -8  10   90.54   40.85
  -8   2  10   55.87   36.08
   2  -8  11  -24.98   26.32
  -8  -2  11   47.09   36.32
  -8   2  11   42.60   35.92
   8  -2  11   33.80   33.42
   8   2  11   29.53   33.48
   2   8  11   24.18   30.34
  -2   8  11   55.27   39.91
  -2  -8  11   79.35   40.37
   8   3   0   25.18    7.13
  -3   8   0   14.79    7.45
  -8   3   0   27.41   10.09
   3   8   0   15.86    8.62
  -8   3   1  297.29   21.92
  -8   3  -1  282.37   13.36
  -8  -3   1  293.09   23.53
  -3   8   1  282.14   21.74
   8   3   1  316.19   19.76
  -8   3  -1  311.95   25.86
   3   8   1  317.32   24.82
  -8  -3   1  355.11   22.99
   3  -8   1  319.80   20.44
  -3  -8   1  338.13   24.63
   8  -3   1  290.56   12.75
  -3   8   2   81.39   15.58
  -8   3   2  100.28   19.79
  -8   3  -2   81.91   14.95
   3   8   2   78.69   15.79
  -3  -8   2   91.85   15.50
  -8  -3   2   79.90   14.53
   3  -8   2   74.88   13.08
  -8  -3   2  110.54   18.64
   8   3   2   79.89   13.61
   8  -3   2   67.66   12.18
  -3  -8   3   45.10    5.33
   3   8   3   43.16   13.56
  -3   8   3   39.61   13.23
  -3  -8   3   47.87   13.84
   8   3   3   38.99   14.27
  -8   3   3   62.07   20.38
  -8  -3   3   52.11   18.06
   3  -8   3   47.74   14.53
   8  -3   3   26.47   10.05
  -8   3  -3   52.73   12.08
  -3  -8   4   25.75   17.17
   8   3   4   35.26   16.47
  -8   3   4   43.18   21.32
   8  -3   4   14.27    8.95
   3  -8   4   29.50   16.14
  -8  -3   4   65.11   23.59
  -3   8   4   70.06   23.54
   3   8   4   23.33   15.54
  -8   3  -4   20.78    8.79
  -8   3   5   76.18   31.17
  -8  -3   5   76.15   31.39
   3  -8   5   67.60   29.54
  -3   8   5   95.38   37.64
   3   8   5  102.70   31.65
  -8   3  -5   49.69   13.92
   8  -3   5   70.23   27.70
   8   3   5   80.99   30.37
  -3  -8   5  116.71   35.42
  -8   3  -6   38.73   12.53
   8   3   6   62.78   26.77
   3   8   6   39.75   28.65
  -3   8   6   58.05   28.65
  -3  -8   6   28.86   22.45
  -8  -3   6   93.16   33.07
   3  -8   6   57.62   24.96
  -8   3   6   51.21   29.32
   8  -3   6   54.35   24.81
   3  -8   7  130.64   45.59
   3   8   7   92.42   37.68
  -3  -8   7  174.74   42.19
   8   3   7  132.14   40.73
  -8   3   7   84.10   39.07
  -3   8   7  102.37   39.75
   8  -3   7  111.10   37.77
  -8  -3   7  122.69   40.19
   8  -3   8   93.50   36.21
  -3  -8   8   68.11   45.57
   3  -8   8  124.03   47.34
  -8  -3   8  105.09   42.96
   3   8   8  148.12   47.32
  -8   3   8  132.25   39.84
  -3   8   8   80.13   37.34
   8   3   8   80.57   36.73
  -3  -8   9   -5.46   23.91
   8   3   9   -0.12   22.54
  -3   8   9   42.81   32.44
   8  -3   9  -12.25   18.08
   3  -8   9    7.65   23.04
  -8   3   9    6.75   18.76
   3   8   9   86.22   35.75
  -8  -3   9    1.78   19.75
  -3   8  10   64.15   41.31
   3   8  10   89.99   40.28
  -8  -3  10   39.70   40.22
  -8   3  10  138.63   51.85
  -3  -8  10   63.86   42.71
   3  -8  10   29.93   30.27
   8  -3  10   33.11   32.92
   8   3  10  -42.85   28.62
   3  -8  11   94.72   45.08
  -3   8  11    7.88   33.56
  -8   3  11   47.93   40.61
  -8  -3  11   68.00   42.27
  -3  -8  11   16.96   32.82
   8   3  11   71.72   45.13
   3   8  11   18.14   34.46
   8  -3  11   42.62   33.67
  -4   8   0  914.04   32.69
   8   4   0  956.19   34.57
   4   8   0  943.75   39.16
  -8   4   0  886.61   45.10
  -8   4   1  581.88   28.61
  -8  -4   1  566.17   29.38
   8  -4   1  512.05   18.98
  -4  -8   1  593.17   33.57
  -4   8   1  613.29   31.14
  -8  -4   1  577.94   33.87
   8   4   1  607.56   29.45
  -8   4  -1  537.22   16.46
  -8   4  -1  538.88   33.55
   4  -8   1  532.11   25.93
   4   8   1  610.17   34.30
   4   8   2   74.63   15.15
  -8  -4   2  101.69   18.33
  -8  -4   2   63.57   12.20
   8   4   2   88.70   15.21
  -4  -8   2   92.13   15.84
   4  -8   2   82.73   13.39
   8  -4   2   61.45   11.42
  -8   4   2   86.24   17.65
  -4   8   2   64.23   13.78
  -8   4  -2   68.39   13.75
   4   8   3   31.50    9.06
  -4   8   3   26.61   11.10
  -4  -8   3   36.64    5.90
  -8  -4   3   48.83   12.50
   8  -4   3   24.03    9.60
  -8   4   3   42.39   13.66
  -8   4  -3   37.74    8.74
   4  -8   3   25.78   11.03
  -4  -8   3   24.25   10.58
   8   4   3   39.40   10.54
  -4   8   4  402.18   43.62
  -8   4   4  343.38   48.05
  -4  -8   4  382.80   42.37
   4   8   4  336.47   39.65
  -8   4  -4  371.87   30.24
   4  -8   4  324.86   42.03
   8  -4   4  352.47   39.56
  -8  -4   4  435.31   47.36
   8   4   4  350.48   40.42
  -8  -4   5 1032.19   79.45
  -8   4  -5 1015.63   50.81
   8   4   5  979.42   72.21
  -4   8   5 1018.22   77.15
   4  -8   5  986.14   77.48
   4   8   5  934.73   73.01
  -8   4   5  941.42   77.59
   8  -4   5 1007.85   77.19
  -4  -8   5  998.62   76.83
  -4   8   6   75.78   29.31
  -8   4   6   93.03   31.40
   4   8   6   13.08   17.46
   4  -8   6  103.33   34.89
   8   4   6   52.36   22.48
   8  -4   6   50.81   25.28
  -4  -8   6   41.02   23.45
  -8  -4   6   24.00   20.84
   8   4   7   90.37   41.04
   4  -8   7   80.90   36.87
  -8  -4   7   56.83   28.37
   8  -4   7   46.74   29.29
  -4   8   7   68.43   35.52
  -4  -8   7    6.83   23.82
  -8   4   7   79.31   35.04
   4   8   7   54.19   25.60
   4  -8   8   51.55   34.15
   8   4   8   79.69   47.43
  -4  -8   8   65.82   39.86
   8  -4   8   42.71   39.89
  -8   4   8   39.56   33.92
  -4   8   8   53.02   36.99
   4   8   8   86.25   40.36
  -8  -4   8   89.46   39.69
  -8   4   9   15.93   30.21
   8  -4   9    9.72   19.48
  -4   8   9   13.78   26.15
  -8  -4   9   33.11   26.40
   4  -8   9   23.63   28.82
   4   8   9   78.52   39.45
  -4  -8   9   14.41   22.83
   8   4   9    4.40   23.14
   8  -4  10  101.13   46.79
  -8   4  10  173.01   51.87
  -4   8  10  146.66   46.85
  -8  -4  10  130.41   51.06
   8   4  10  113.33   49.29
   4   8  10  104.84   40.86
  -4  -8  10  122.32   47.73
   4  -8  10  118.81   45.66
   8  -4  11   35.82   34.10
   4  -8  11   77.38   45.98
  -4  -8  11   55.16   41.32
  -8  -4  11  141.76   54.48
   4   8  11   67.96   50.55
  -8   4  11  173.26   60.17
   8   4  11  131.86   51.39
  -4   8  11  113.84   50.72
  -5   8   0   24.54    6.94
   5   8   0   29.35    8.52
   8   5   0   26.04    6.46
   8   5   1  231.06   19.44
  -5  -8   1  282.87   24.70
   5  -8   1  217.37   15.83
   5   8   1  233.89   22.69
  -5   8   1  231.91   20.02
  -8   5  -1  201.00   10.94
  -8   5  -1  213.88   21.70
  -8   5   1  213.86   16.72
  -8  -5   1  230.33   20.80
  -8  -5   1  221.77   19.85
   8  -5   1  191.87   11.98
  -5   8   2   60.66   14.82
   8   5   2   66.34   14.34
  -5  -8   2   68.04   14.63
  -8   5  -2   59.44   14.32
   8  -5   2   59.87   12.11
  -8   5   2   76.80   16.64
  -8  -5   2  126.48   21.02
  -8  -5   2   65.42   14.57
   5  -8   2   67.37   12.39
   5   8   2   58.40   14.94
   8   5   3   20.17   11.04
   8  -5   3   12.52    6.54
  -5  -8   3   19.41   13.27
  -5  -8   3   10.19    4.38
   5   8   3    7.88   10.40
  -8   5  -3   21.24    8.56
   5  -8   3    7.74    8.08
  -5   8   3   29.58   13.02
  -8  -5   3    5.17    3.63
  -8  -5   3   50.01   18.77
  -8   5   3    8.56   13.01
   8  -5   4  246.18   36.07
  -5   8   4  344.82   43.92
   8   5   4  273.49   40.79
   5  -8   4  243.55   38.54
  -8   5  -4  220.45   23.16
  -8   5   4  220.74   43.38
  -5  -8   4  289.73   43.59
   5   8   4  205.51   34.29
  -8  -5   4  249.90   40.09
   8   5   5  257.79   42.72
  -8   5   5  205.89   49.07
   5  -8   5  218.48   42.64
  -8  -5   5  244.89   43.88
   8  -5   5  187.26   40.60
   5   8   5  233.80   46.36
  -5   8   5  259.60   49.39
  -8   5  -5  148.28   20.46
  -5  -8   5  306.27   51.33
  -8   5   6   22.07   19.86
  -5  -8   6   35.25   23.83
  -5   8   6   11.37   23.58
   5  -8   6   49.58   24.50
   8   5   6   27.49   19.77
  -8  -5   6   30.81   20.82
   5   8   6    1.19   12.77
   8  -5   6   49.95   27.97
   5  -8   7  193.81   51.74
   5   8   7  159.46   46.24
  -5   8   7  215.54   52.29
  -8   5   7  216.15   50.64
  -8  -5   7  216.28   53.42
   8  -5   7  226.25   47.59
  -5  -8   7  174.68   47.35
   8   5   7  208.13   51.88
  -5   8   8  103.78   43.35
  -5  -8   8  137.40   57.83
   5   8   8  137.10   49.08
  -8   5   8  187.87   51.49
  -8  -5   8  175.70   50.97
   8  -5   8  184.03   51.37
   5  -8   8  124.14   54.53
   8   5   8  213.61   52.90
   5   8   9   -9.42   20.26
   5  -8   9   10.16   22.11
  -8   5   9  -28.80   35.01
  -8  -5   9   -4.08   20.60
  -5  -8   9    4.49   18.31
  -5   8   9   25.42   25.95
   8   5   9   26.00   28.04
   8  -5   9    2.40   21.58
  -5   8  10  100.38   44.58
  -8  -5  10  125.48   51.59
   8   5  10  206.61   56.30
  -5  -8  10  152.05   52.63
  -8   5  10   91.42   50.61
   5   8  10   78.61   44.11
   8  -5  10  129.06   50.39
   5  -8  10   91.01   45.66
   5  -8  11  100.59   47.13
  -5   8  11   32.41   30.81
   8  -5  11   49.29   41.08
  -8   5  11  163.04   55.80
   5   8  11   46.16   40.32
  -5  -8  11   65.26   43.75
   8   5  11  130.15   53.09
  -8  -5  11  100.65   49.53
   8  -6   0  509.58   17.81
  -6   8   0  521.58   23.21
   6   8   0  547.83   31.00
   8   6   0  477.46   27.83
  -8   6   0  560.13   17.98
  -8  -6   1 1055.78   42.59
   8  -6   1  912.62   26.20
   6   8   1 1048.92   45.80
  -6  -8   1  899.57   41.89
   6  -8   1  886.98   30.25
  -6   8   1 1003.70   40.26
   8   6   1 1023.33   42.54
  -8   6   1  941.00   35.18
  -6  -8   2   75.63   16.23
  -8   6  -2   49.50   11.91
   8  -6   2   48.46   10.82
   6  -8   2   43.88   10.33
   8   6   2   50.42   13.74
  -8  -6   2   54.86   12.68
  -8  -6   2   88.88   17.06
   6   8   2   57.56   14.79
  -8   6   2   53.97   14.46
  -6   8   2   54.16   13.05
   8  -6   3   38.15   14.97
  -8   6   3   42.43   15.54
   6  -8   3   42.37   15.70
   6   8   3   55.27   14.65
  -6   8   3   70.30   19.23
   8   6   3   47.48   14.65
  -8  -6   3   49.28   10.90
  -8  -6   3  142.24   30.47
  -6  -8   3   36.41    7.82
  -6  -8   3  123.94   25.96
  -8   6  -3   39.26   10.06
  -8  -6   4 1025.23   72.27
  -8   6   4  878.84   69.98
  -6  -8   4  897.84   70.51
   8   6   4  882.64   63.06
  -6   8   4  947.09   68.07
   6  -8   4  757.02   67.60
  -8   6  -4  820.86   41.44
   8  -6   4  958.78   66.88
   6   8   4  880.43   64.25
  -6  -8   5 1576.73   92.27
   6  -8   5 1394.66   96.36
  -8   6   5 1387.50   92.19
   8  -6   5 1528.04   94.46
  -6   8   5 1402.85   91.64
  -8  -6   5 1461.59   91.04
   6   8   5 1428.44   86.31
   8   6   5 1385.94   86.59
  -8   6  -5 1291.93   49.92
  -8  -6   6  104.90   30.58
  -6  -8   6   92.49   27.33
   8   6   6   48.84   22.58
   8  -6   6   79.56   26.58
   6  -8   6   51.92   20.74
   6   8   6   80.58   23.88
  -8   6   6   86.82   29.82
  -6   8   6   75.83   32.01
  -6  -8   7   96.24   39.44
  -6   8   7   49.04   33.12
   8   6   7  103.15   37.30
   6   8   7  110.20   39.75
  -8  -6   7   86.40   39.59
   8  -6   7   95.18   35.88
   6  -8   7   72.49   38.92
  -8   6   7   84.14   37.60
   8   6   8  100.65   41.54
  -8  -6   8  114.29   46.24
   6   8   8   86.53   43.10
  -6  -8   8  132.74   46.07
  -8   6   8  101.78   45.23
   6  -8   8   92.62   41.59
   8  -6   8   97.47   43.42
  -6   8   8  103.28   41.62
  -8  -6   9  -49.88   36.27
   8   6   9   26.14   29.47
   8  -6   9   15.95   24.29
   6  -8   9   23.00   26.98
  -6  -8   9   20.36   21.24
  -6   8   9  -36.99   27.51
  -8   6   9  -32.33   25.68
   6   8   9   12.41   26.05
   8   6  10  224.58   60.11
   6   8  10  272.76   62.07
  -8  -6  10  251.54   61.18
   6  -8  10  269.08   65.08
  -8   6  10  179.92   51.08
  -6  -8  10  277.98   66.21
   8  -6  10  236.41   60.58
  -6   8  10  160.28   52.35
   8  -6  11   59.37   43.58
  -6  -8  11  167.54   60.32
   8   6  11  138.83   53.95
  -6   8  11   65.45   39.76
   6   8  11   84.52   51.50
  -8  -6  11  178.67   57.36
   6  -8  11  115.04   46.04
  -8   6  11  133.97   49.76
   7   8   0   17.88    6.68
   8   7   0   14.28    6.22
  -7   8   0   16.45    5.26
  -8   7   0   17.32    3.79
   8   7   1  531.68   33.30
   7  -8   1  479.05   21.40
  -8   7   1  488.03   26.13
   8  -7   1  481.78   20.34
  -7  -8   1  561.26   34.46
  -7   8   1  539.78   29.54
   7   8   1  525.70   32.51
  -8  -7   1  537.27   31.96
  -8  -7   2  186.35   22.02
  -8   7   2  255.82   27.65
   7   8   2  228.83   27.00
   8   7   2  212.79   25.35
  -7  -8   2  258.93   28.49
  -7  -8   2  181.32   19.94
   7  -8   2  216.42   22.17
   8  -7   2  200.77   20.24
  -7   8   2  231.78   26.02
  -7   8   3   54.80   18.96
  -7  -8   3   56.05   10.68
  -8   7   3   54.75   20.01
   8  -7   3   53.14   14.39
   7  -8   3   56.97   16.29
  -7  -8   3   68.01   13.95
   8   7   3   48.90   16.72
  -8  -7   3   59.53   12.32
   7   8   3   52.56   17.62
  -8   7  -3   39.31   10.57
  -8   7  -4  725.25   37.00
   8  -7   4  920.48   67.19
  -8  -7   4  962.56   69.57
  -7  -8   4  969.84   68.77
   7  -8   4  852.12   66.92
   7   8   4  929.61   67.02
   8   7   4  903.26   63.43
  -8   7   4  885.32   70.22
  -7   8   4  902.52   68.21
  -8   7   5  138.93   41.00
  -7  -8   5  199.83   45.71
  -8  -7   5  210.44   41.15
  -7   8   5  240.52   53.21
  -8   7  -5   81.78   13.47
   7  -8   5  214.93   41.42
   8   7   5  166.68   41.45
   7   8   5  136.72   39.20
   8  -7   5  176.89   40.33
  -7   8   6   75.03   29.74
  -7  -8   6   87.95   31.59
   8   7   6   89.47   32.11
  -8   7   6   59.57   24.45
   7  -8   6  111.51   33.42
  -8  -7   6   62.07   27.04
   7   8   6   88.02   27.42
   8  -7   6  109.42   32.46
  -8   7   7  206.15   50.11
   7  -8   7  179.86   46.89
   7   8   7  211.12   46.60
  -7  -8   7  193.64   47.26
   8   7   7  170.14   42.49
  -8  -7   7  141.09   46.64
   8  -7   7  126.01   40.39
  -7   8   7  175.28   49.98
   8  -7   8  150.92   43.07
   8   7   8  143.57   44.08
  -8   7   8  125.90   47.58
  -7   8   8  101.08   37.53
  -8  -7   8  123.72   51.34
  -7  -8   8  116.83   53.12
   7   8   8   92.72   48.35
   7  -8   8  126.75   54.29
  -7  -8   9   39.25   28.34
   8   7   9   25.88   32.98
   7  -8   9  -10.69   22.23
   7   8   9  -51.30   29.34
  -7   8   9  -18.86   27.57
  -8   7   9   57.32   32.10
  -8  -7   9  -15.70   30.17
   8  -7   9   -9.31   24.02
  -8   7  10   78.76   41.17
   8  -7  10  158.15   57.30
   7   8  10  115.30   40.20
  -7  -8  10   83.26   42.60
  -7   8  10   49.73   40.83
   7  -8  10  139.67   50.15
   8   7  10   48.18   51.89
  -8  -7  10  111.07   50.45
  -8  -7  11  141.45   57.76
   8   7  11  121.04   49.59
   7   8  11   68.62   41.84
   7  -8  11   77.70   47.34
  -7   8  11   84.30   40.29
   8  -7  11   88.11   46.81
  -8   7  11  179.08   63.38
  -7  -8  11   63.02   46.07
  -8   8   0  234.85   14.74
   8   8   0  227.34   21.62
   8  -8   1 1054.19   30.94
  -8  -8   1 1234.29   49.40
   8   8   1  990.73   45.89
  -8   8   1 1197.28   43.38
  -8  -8   2   75.03   14.28
   8   8   2  127.14   20.10
   8  -8   2  103.95   15.36
  -8  -8   2  146.17   22.93
  -8   8   2  105.94   19.89
   8   8   3   57.96   16.94
   8  -8   3   50.86   15.73
  -8   8   3   69.39   18.75
  -8  -8   3   55.68   11.85
  -8  -8   4  420.67   49.95
   8  -8   4  338.31   45.58
   8   8   4  366.24   43.92
  -8   8   4  311.89   45.01
   8  -8   5  860.21   72.88
   8   8   5  804.24   65.45
  -8   8   5  763.34   69.77
  -8  -8   5  779.17   66.99
   8  -8   6  231.86   43.31
  -8   8   6  152.89   38.35
   8   8   6  200.58   40.56
  -8  -8   6  236.49   45.47
   8   8   7  163.57   41.99
   8  -8   7  150.02   40.53
  -8   8   7  133.64   43.48
  -8  -8   7  107.93   40.74
  -8   8   8  112.16   45.22
   8  -8   8   76.44   41.16
   8   8   8  109.03   44.72
  -8  -8   8   68.69   36.84
  -8  -8   9  -12.44   24.18
   8   8   9  -47.68   33.23
  -8   8   9  -20.34   19.86
   8  -8   9   29.08   26.54
  -8   8  10  109.08   44.44
   8   8  10  162.14   49.72
  -8  -8  10  126.53   50.39
   8  -8  10  155.18   54.02
  -8  -8  11   94.35   45.30
  -8   8  11  185.15   60.07
   8   8  11  169.37   64.10
  -9   0   0    9.75    3.56
  -9   0   0    8.11    5.30
   0   9   0   10.10    7.84
  -9   0   0   11.74   10.64
  -9   0   1    4.10    4.67
   0  -9   1   -3.67    6.08
  -9   0  -1   -0.87    4.50
   0   9   1    4.23    4.08
   9   0   1    0.13    2.61
  -9   0   1    8.71    6.09
   9   0   2   67.99   11.18
  -9   0   2   65.60   14.64
   0  -9   2   79.90   17.02
   0   9   2   56.29   13.55
   0   9   3   41.53   21.09
   9   0   3   39.78   12.71
  -9   0   3   39.53   14.15
   0  -9   3   84.01   23.05
   0  -9   4  346.53   39.75
  -9   0   4  408.66   46.77
   9   0   4  404.96   38.10
   0   9   4  409.94   41.02
   0   9   5   46.02   17.92
   0  -9   5   36.66   16.96
  -9   0   5   76.72   24.53
   9   0   5   48.19   18.28
   0  -9   6   55.94   25.27
   0   9   6   93.34   35.39
   9   0   6   73.12   29.56
  -9   0   6  139.37   41.64
  -9   0   7   72.22   37.64
   9   0   7   70.41   31.86
   0   9   7   24.85   25.18
   0  -9   7   31.19   22.58
  -9   0   8   34.82   28.46
   9   0   8    8.76   20.29
   0   9   8   52.02   27.20
   0  -9   8   -1.82   17.13
   0  -9   9   95.87   44.35
   0   9   9   82.13   41.74
  -9   0   9   79.69   43.01
   9   0   9   95.51   42.35
   0   9  10   -1.53   27.32
  -9   0  10   -1.38   22.50
   9   0  10   82.83   37.43
   0  -9  10   14.50   33.50
   0   9  11    3.57   28.79
  -9   0  11   33.54   32.48
   9   0  11  -17.55   25.80
   0  -9  11   23.71   31.12
  -9  -1   0   15.71    7.87
  -9  -1   0   14.35    4.26
  -9   1   0   19.57    8.26
  -9   1   0   14.35    3.25
  -9   1   0   18.41    3.62
   1   9   0   18.35    6.33
  -1   9   0   13.00    4.96
  -9   1   1   46.15   11.37
  -9  -1   1   54.42   10.27
  -1  -9   1   49.93   10.41
  -9  -1   1   58.48   12.23
  -9  -1  -1   42.38   10.09
  -9   1   1   48.99    9.33
   9  -1   1   45.32    5.92
   9   1   1   47.04    7.25
  -1   9   1   63.87   12.87
  -9   1  -1   45.48   11.74
   1   9   1   55.53   10.40
   1  -9   1   38.04    8.45
  -9   1   2 1167.17   57.77
   9   1   2 1191.59   44.50
  -1  -9   2 1181.22   51.29
   1   9   2 1167.90   53.29
  -1   9   2 1136.43   53.46
  -9   1  -2 1234.51   51.74
  -9  -1   2 1189.04   54.65
   9  -1   2 1157.45   42.34
  -9  -1   2 1220.16   52.59
   1  -9   2 1190.54   50.66
   9   1   3 2058.23   72.84
  -1   9   3 2063.69   79.48
   1  -9   3 2017.63   77.54
   9  -1   3 1939.78   70.33
  -1  -9   3 1989.67   77.35
  -9  -1   3 2044.32   86.65
   1   9   3 2066.83   79.79
  -9   1   3 1986.08   87.86
   9   1   4  375.70   38.84
  -9  -1   4  376.06   43.90
  -9   1   4  379.22   45.91
  -1  -9   4  326.77   39.74
  -1   9   4  393.45   40.85
   1   9   4  319.40   39.69
   1  -9   4  324.41   37.51
   9  -1   4  387.48   38.27
   9  -1   5   40.14   17.91
  -1   9   5   49.63   19.27
   9   1   5   69.68   21.80
   1   9   5   44.61   19.87
   1  -9   5   45.15   21.24
  -9   1   5   63.29   23.71
  -9  -1   5   18.74   18.61
  -1  -9   5   71.30   28.40
   1   9   6   62.73   30.85
  -1   9   6   39.70   27.91
  -9  -1   6   88.03   37.48
   1  -9   6  106.33   33.65
  -9   1   6   85.66   36.82
  -1  -9   6   60.09   27.88
   9  -1   6   59.47   26.36
   9   1   6   60.85   26.27
  -1   9   7  151.23   40.54
  -9  -1   7  137.60   42.44
   9  -1   7  146.40   37.75
  -1  -9   7  165.60   39.98
   1   9   7  139.25   36.01
   1  -9   7  127.31   34.90
   9   1   7  142.64   40.18
  -9   1   7  153.32   44.51
  -1   9   8  145.00   40.42
  -9   1   8  132.33   42.84
   1  -9   8   66.37   33.57
  -9  -1   8   86.74   38.08
   1   9   8   88.95   32.22
   9   1   8   48.60   26.65
  -1  -9   8   80.90   34.84
   9  -1   8   74.09   32.76
   1  -9   9   94.82   43.76
  -9   1   9  150.59   55.07
  -1  -9   9   54.65   41.31
   9  -1   9   75.26   39.55
  -1   9   9  159.50   47.40
   1   9   9  106.69   35.14
  -9  -1   9  113.32   46.60
   9   1   9   64.29   36.32
   9   1  10  -33.88   33.28
  -9   1  10   67.58   31.46
   1  -9  10   24.08   32.50
   1   9  10   79.75   40.58
  -1  -9  10   23.48   28.01
  -1   9  10    5.21   22.13
  -9  -1  10   19.30   18.85
   9  -1  10   -3.06   32.48
  -1  -9  11   14.36   31.53
  -9   1  11   -3.79   25.71
   1   9  11   16.67   29.80
  -1   9  11   42.03   37.40
   9  -1  11   11.12   29.81
  -9  -1  11  -12.29   22.16
   1  -9  11   10.82   26.17
   9   1  11   -3.19   25.40
  -2   9   0   27.71    9.74
  -9  -2   0   41.97    7.89
  -9  -2   0   35.48   10.86
  -9   2   0   45.00   13.34
   2   9   0   55.50   14.06
  -2   9   1   25.48    7.98
  -9  -2   1   37.86    8.77
  -9   2  -1   42.71    6.81
  -2  -9   1   32.74    8.87
   2   9   1   25.64    9.78
   9   2   1   28.92    6.62
   2  -9   1   20.75    5.88
  -9   2   1   22.38    9.00
  -9   2   1   24.31    8.78
  -9  -2   1   31.57   10.42
  -9   2  -1   16.96    9.82
   9  -2   1   16.86    2.81
  -2  -9   2   91.69   16.95
   9  -2   2   75.23   11.01
   9   2   2   83.23   13.49
  -9   2   2   86.37   17.00
   2  -9   2   95.80   15.62
   2   9   2   86.93   16.58
  -9   2  -2   78.37   14.95
  -2   9   2   93.80   16.86
  -9  -2   2   96.12   16.90
  -9  -2   2   83.39   15.27
  -9  -2   3  142.09   25.98
  -2   9   3  193.36   30.25
  -9   2   3  127.42   25.71
  -2  -9   3  158.87   27.78
   9   2   3  131.32   21.97
   2   9   3  125.04   23.96
   9  -2   3  135.57   21.18
  -9   2  -3  159.45   21.48
   2  -9   3  130.41   22.71
   9  -2   4  208.62   30.35
  -9  -2   4  266.69   39.73
   2   9   4  214.61   32.94
  -9   2   4  264.39   38.61
  -2  -9   4  219.45   31.74
   9   2   4  244.14   30.84
   2  -9   4  231.49   32.51
  -2   9   4  265.57   36.00
  -9  -2   5  117.05   31.32
   2  -9   5   67.19   23.96
  -2   9   5   65.97   25.10
   9  -2   5   66.06   22.58
   9   2   5   55.66   21.42
  -9   2   5   31.17   22.22
  -2  -9   5   81.53   28.39
   2   9   5   69.60   27.08
   9  -2   6   80.16   33.08
   9   2   6   91.51   30.59
   2  -9   6  105.08   34.63
  -2   9   6   72.43   33.18
  -2  -9   6   91.62   30.29
  -9   2   6  115.29   40.32
  -9  -2   6  101.21   33.29
   2   9   6   72.36   32.05
  -9   2   7   94.73   37.73
   9   2   7  104.31   36.99
  -2   9   7   97.32   37.19
   2  -9   7   76.28   31.16
  -2  -9   7   97.29   35.64
   9  -2   7   80.43   33.58
   2   9   7   83.83   36.43
  -9  -2   7  112.98   42.31
   9   2   8   80.12   42.45
   9  -2   8   10.02   23.52
  -2   9   8   69.29   36.67
   2   9   8   47.24   29.11
  -9   2   8   40.84   32.71
  -2  -9   8   35.74   27.48
   2  -9   8   29.21   34.21
  -9  -2   8   57.59   31.37
  -2  -9   9   63.59   35.80
  -2   9   9   86.64   41.94
   2   9   9   80.82   35.32
  -9  -2   9   72.19   41.09
  -9   2   9   94.20   48.18
   9   2   9   73.21   36.05
   2  -9   9   39.62   29.05
   9  -2   9   38.98   35.95
  -9  -2  10   64.66   40.49
  -9   2  10    6.17   32.23
   2  -9  10   84.53   43.65
   9  -2  10   25.79   23.26
  -2   9  10   29.53   21.03
  -2  -9  10   39.62   36.77
   2   9  10   10.89   30.50
   9   2  10   13.02   24.52
  -9  -2  11    7.93   23.47
  -2  -9  11   19.49   39.80
  -2   9  11   35.09   32.37
  -9   2  11   68.24   39.24
   2   9  11   74.76   40.42
   9   2  11   31.62   36.90
   2  -9  11  -22.63   30.47
   9  -2  11   39.77   36.04
  -3   9   0   37.61    7.98
   3   9   0   33.82    8.57
  -9  -3   0   27.45    8.25
   9   3   0   20.84    5.10
  -9   3   0   26.68    9.77
   9   3   1   70.21    9.83
  -9   3  -1   81.17   14.84
  -9  -3   1  105.41   13.94
   3  -9   1   74.80   11.65
   3   9   1   75.89   14.16
  -3  -9   1   75.19   12.62
  -3   9   1   71.38   12.39
  -9   3   1   63.42   10.62
  -9  -3   1   78.60   14.47
   9   3   2  390.66   27.77
  -3   9   2  369.91   31.66
   3  -9   2  377.46   29.18
  -3  -9   2  418.38   32.08
   9  -3   2  369.32   25.30
  -9  -3   2  395.30   29.49
   3   9   2  357.55   30.90
  -9  -3   2  401.26   31.31
  -9   3  -2  409.84   30.73
  -9   3   2  363.67   33.52
   3   9   3 1177.34   61.73
  -9   3   3 1153.49   67.70
   9  -3   3 1133.79   57.48
  -9  -3   3 1000.86   59.64
   3  -9   3 1202.38   59.69
  -3  -9   3 1147.72   60.57
  -3  -9   3 1015.00   25.87
  -9   3  -3 1105.26   51.72
  -3   9   3 1206.81   63.04
   9   3   3 1221.40   57.33
  -3  -9   4  206.84   30.43
   3  -9   4  205.99   31.24
  -9   3   4  242.45   36.38
   9   3   4  226.78   30.37
  -3   9   4  223.74   32.73
  -9  -3   4  234.44   34.67
   3   9   4  200.67   30.03
  -9   3  -4  199.69   22.85
   9  -3   4  200.38   31.37
  -9   3   5   57.14   26.28
   9  -3   5   38.12   21.58
  -3  -9   5   43.50   21.43
   9   3   5   55.99   22.07
   3   9   5   25.00   20.43
  -3   9   5   50.18   26.96
  -9   3  -5   21.15    9.94
  -9  -3   5   54.17   21.18
   3  -9   5   54.73   25.05
   3   9   6   48.68   30.66
  -9   3   6   64.64   34.85
  -3  -9   6   86.59   29.72
  -3   9   6   82.85   32.03
   9   3   6   63.38   27.91
  -9   3  -6   83.57   19.35
   9  -3   6   60.86   26.31
   3  -9   6   80.29   32.15
  -9  -3   6  114.71   38.56
  -9   3   7  261.67   48.47
  -9  -3   7  295.18   56.93
   9   3   7  324.44   50.65
  -3  -9   7  217.61   50.98
   9  -3   7  262.82   50.18
  -3   9   7  284.30   56.18
   3   9   7  226.47   51.50
   3  -9   7  350.97   57.99
  -3   9   8  211.66   51.27
  -3  -9   8  153.94   43.82
  -9   3   8  204.24   52.63
   9   3   8  177.90   48.99
  -9  -3   8  231.49   51.25
   3   9   8  144.18   41.31
   3  -9   8  176.87   45.50
   9  -3   8  208.80   47.40
  -3   9   9  110.74   39.24
  -9   3   9   24.97   26.07
   9  -3   9   64.31   37.64
  -3  -9   9   18.46   24.19
  -9  -3   9  104.10   39.98
   9   3   9   72.79   35.69
   3  -9   9   38.11   25.75
   3   9   9   50.65   34.83
   3   9  10   39.69   26.66
   9   3  10   59.20   33.63
  -9   3  10   71.43   35.49
   9  -3  10   31.69   29.26
  -3   9  10   23.49   33.33
  -3  -9  10   56.99   34.36
  -9  -3  10   91.49   42.81
   3  -9  10   12.09   25.37
   3   9  11   47.89   38.88
   3  -9  11   80.13   35.77
  -9   3  11   40.77   44.05
   9   3  11  -13.51   26.79
  -3  -9  11   -0.07   28.21
   9  -3  11   53.43   39.99
  -3   9  11   70.90   40.20
  -9  -3  11    3.98   23.87
  -9   4   0   13.30    6.15
   9   4   0   10.68    3.90
   4   9   0   11.49    9.45
  -4   9   0   10.77    5.73
  -9   4   1   80.94   12.02
  -9  -4   1   89.77   15.39
   4  -9   1   87.61   11.91
   4   9   1   93.06   15.24
  -9   4  -1   89.56   15.67
  -4   9   1   88.48   14.51
   9   4   1   96.83   12.43
  -4  -9   1   77.17   12.95
  -9  -4   1  109.27   15.22
  -9  -4   2  268.93   26.26
  -4  -9   2  252.16   26.65
   4   9   2  226.13   26.31
  -4   9   2  274.37   27.12
   9   4   2  240.85   23.16
  -9  -4   2  224.83   22.35
   4  -9   2  232.99   20.99
  -9   4   2  235.27   27.54
   9  -4   2  232.81   20.46
  -9   4  -2  213.92   22.48
   4  -9   3  100.35   19.78
  -4  -9   3  112.70   10.86
  -9  -4   3  130.84   23.50
   9   4   3   82.87   16.72
  -9   4   3   97.78   20.91
  -9   4  -3  120.78   18.65
  -4  -9   3  130.02   22.89
  -9  -4   3  110.91   17.10
   4   9   3   99.93   20.38
  -4   9   3  106.97   21.82
   9  -4   3   82.19   17.50
  -4  -9   4  149.43   28.41
   9   4   4  142.95   27.22
   4   9   4  153.90   28.81
   4  -9   4  140.90   26.88
   9  -4   4  125.05   25.55
  -9   4   4  169.04   33.98
  -9  -4   4  147.35   28.40
  -9   4  -4  122.07   18.87
  -4   9   4  163.68   31.95
  -4  -9   5  106.79   33.44
  -9   4   5   96.32   38.43
   9  -4   5   84.17   26.44
   4   9   5   66.64   27.91
  -9   4  -5   70.21   18.35
   9   4   5  112.12   32.09
   4  -9   5   61.28   31.84
  -4   9   5   79.79   30.28
  -9  -4   5  126.80   37.78
   4  -9   6   74.32   29.59
  -9  -4   6   74.36   33.58
   4   9   6   56.42   31.20
  -4   9   6   85.98   31.58
  -4  -9   6   42.59   24.29
   9   4   6   38.06   21.45
   9  -4   6   52.88   23.09
  -9   4   6   35.27   29.30
  -9  -4   7  127.44   40.16
  -4  -9   7  145.95   40.04
  -4   9   7  123.20   45.18
   4  -9   7  157.40   43.29
   9  -4   7  131.61   37.68
   9   4   7  143.18   42.34
  -9   4   7  146.87   43.74
   4   9   7  135.09   43.45
   9   4   8   94.17   45.74
   9  -4   8   73.21   39.54
   4  -9   8   59.34   29.56
  -9  -4   8   93.63   42.97
  -9   4   8   75.05   44.65
  -4   9   8   63.24   33.59
  -4  -9   8   54.98   36.81
   4   9   8   58.81   36.14
   4   9   9   73.66   36.43
   9   4   9   82.86   30.81
   9  -4   9   47.21   24.74
  -4  -9   9   43.99   31.14
  -9   4   9   32.50   26.39
  -9  -4   9   39.50   26.36
  -4   9   9   -4.62   19.82
   4  -9   9   28.75   29.58
   4   9  10   50.50   36.66
   4  -9  10   74.72   40.04
  -4   9  10   31.04   28.17
  -4  -9  10   95.57   49.42
  -9  -4  10   48.45   37.92
   9  -4  10   55.60   32.81
   9   4  10   45.43   24.96
  -9   4  10   65.57   40.01
   9   4  11   18.12   33.14
  -4   9  11   60.39   34.79
  -4  -9  11   19.37   34.88
  -9  -4  11   26.74   27.81
   9  -4  11   43.12   30.01
   4   9  11  105.68   54.36
   4  -9  11  121.26   52.66
  -9   4  11   68.70   43.58
   5   9   0   17.48    7.24
  -5   9   0   18.10    5.65
   9   5   0   18.31    6.30
   9  -5   1   55.02    6.32
   5   9   1   77.03   14.53
  -9  -5   1   80.42   12.74
  -9   5  -1   70.31   15.22
   5  -9   1   62.02   10.52
  -5  -9   1   82.04   13.60
   9   5   1   72.59   11.77
  -5   9   1   65.69   11.38
  -9   5   1   58.08    9.84
  -9  -5   1   70.18   13.60
  -9   5  -1   72.93    6.57
  -5   9   2  567.77   37.83
  -9  -5   2  545.20   36.25
   5  -9   2  569.86   33.97
  -9   5   2  605.09   40.35
  -9   5  -2  553.10   37.27
  -5  -9   2  679.34   41.72
   9   5   2  556.71   36.32
   5   9   2  534.98   39.95
   9  -5   2  559.01   32.49
  -9  -5   2  569.36   35.05
   5   9   3  523.82   41.61
   9  -5   3  507.94   39.61
   9   5   3  518.21   40.24
  -9   5  -3  482.86   34.31
  -5  -9   3  450.21   22.89
  -9   5   3  506.82   45.80
   5  -9   3  518.90   39.85
  -5  -9   3  539.28   42.51
  -9  -5   3  467.23   31.34
  -9  -5   3  540.92   43.59
  -5   9   3  563.90   43.99
   5   9   4  129.24   29.55
  -9   5  -4  100.95   18.56
  -9  -5   4  134.36   29.85
   5  -9   4  107.02   27.46
   9  -5   4  111.77   26.11
   9   5   4  126.12   29.85
  -5  -9   4  174.23   33.62
  -5   9   4  196.46   35.65
  -9   5   4  139.08   31.61
  -9  -5   5   55.10   27.77
   9  -5   5   66.47   29.23
   9   5   5   58.76   25.06
   5   9   5   81.39   30.28
  -5  -9   5   46.18   27.33
  -9   5  -5   48.62   14.02
  -5   9   5   48.17   26.77
  -9   5   5   84.99   31.72
   5  -9   5   55.36   27.46
  -9   5   6   32.95   24.44
   5  -9   6   43.19   21.05
  -5  -9   6   25.65   17.52
   9   5   6   33.02   19.23
   5   9   6   40.52   28.08
  -9  -5   6   36.21   24.42
  -5   9   6   21.54   20.07
   9  -5   6   27.13   20.89
  -9   5   7  310.90   60.43
   5  -9   7  418.38   62.93
  -5  -9   7  354.67   59.09
   9   5   7  334.22   57.91
   5   9   7  338.48   56.96
  -5   9   7  310.61   56.76
  -9  -5   7  280.70   55.53
   9  -5   7  353.79   59.69
  -9  -5   8  321.88   63.35
  -5   9   8  275.89   56.56
   9  -5   8  297.48   55.57
  -9   5   8  334.02   62.54
   5  -9   8  339.13   62.72
   5   9   8  323.39   60.94
  -5  -9   8  329.15   61.30
   9   5   8  339.05   60.31
   9  -5   9  -17.99   29.24
  -9  -5   9  -19.66   24.37
  -5   9   9   29.08   24.76
   5   9   9   19.47   26.36
   5  -9   9   13.35   24.72
  -9   5   9  -54.42   23.93
   9   5   9   10.45   24.03
  -5  -9   9  -21.21   22.26
   9  -5  10   65.95   45.41
  -9   5  10   38.80   34.41
  -9  -5  10   43.10   35.56
   5   9  10  106.42   48.20
   9   5  10   12.70   30.37
  -5   9  10   67.32   42.88
  -5  -9  10  124.09   47.08
   5  -9  10  104.52   47.24
  -5   9  11   26.39   32.36
  -9   5  11   62.01   41.65
   5   9  11   45.02   33.97
   9   5  11   25.78   34.91
   9  -5  11    4.03   27.91
  -9  -5  11   25.36   33.32
   5  -9  11   74.69   45.00
  -5  -9  11   44.69   34.21
   9   6   0   11.06    5.36
   6   9   0   14.62    6.95
   9  -6   0   16.02    3.52
  -9   6   0   17.55    3.93
  -6   9   0    7.25    4.22
   6  -9   1  205.29   16.14
   9   6   1  211.73   20.14
  -6   9   1  212.75   19.63
  -9   6  -1  216.23   24.10
  -9  -6   1  254.32   22.70
   6   9   1  226.53   22.82
  -6  -9   1  242.26   23.34
  -9  -6   1  211.77   22.35
   9  -6   1  198.95   12.27
  -9   6   1  204.15   17.20
  -9   6   2  181.89   23.36
  -9   6  -2  174.65   21.33
   6   9   2  190.62   24.06
  -9  -6   2  236.05   26.69
   9  -6   2  182.58   19.14
  -6  -9   2  273.13   29.82
  -9  -6   2  205.83   22.07
  -6   9   2  188.58   24.00
   6  -9   2  182.62   19.31
   9   6   2  181.45   21.43
  -9   6   3  132.19   25.15
   6  -9   3  134.76   22.01
   9   6   3  140.43   22.62
  -6  -9   3  142.94   14.82
  -6  -9   3   80.10   14.13
  -9   6  -3  139.72   19.40
   6   9   3  132.70   23.37
  -6   9   3  160.23   25.43
  -9  -6   3  138.65   18.17
   9  -6   3  116.12   20.92
  -9   6   4  655.09   60.77
   6   9   4  563.59   52.12
  -6  -9   4  549.27   55.19
   9  -6   4  538.41   51.72
   6  -9   4  520.24   50.59
  -9   6  -4  513.54   35.82
  -6   9   4  626.91   54.92
  -9  -6   4  632.19   56.41
   9   6   4  579.96   49.87
  -6  -9   5  132.26   34.60
  -6   9   5  144.93   37.60
  -9   6  -5   77.11   14.84
   9  -6   5   74.49   27.93
  -9  -6   5  172.56   43.51
  -9   6   5  118.25   42.85
   6  -9   5   69.49   30.43
   6   9   5  154.65   35.84
   9   6   5   82.92   30.34
  -6   9   6   26.75   24.20
   6  -9   6    6.42   13.25
  -9   6   6    4.96   18.09
   9   6   6   45.27   22.79
   9  -6   6   16.27   17.50
   6   9   6   38.02   22.64
  -9  -6   6   27.33   24.88
  -6  -9   6   25.47   16.22
  -6   9   7  139.02   43.35
  -9   6   7  104.78   40.57
   6   9   7  163.20   43.70
   9   6   7  149.83   38.49
   6  -9   7  187.88   47.66
   9  -6   7  127.53   46.03
  -9  -6   7  105.12   38.37
  -6  -9   7  217.35   50.61
  -6   9   8   89.58   44.17
   6   9   8   71.02   40.87
  -6  -9   8   68.82   43.82
   6  -9   8  118.40   45.51
   9   6   8   96.91   47.57
  -9  -6   8  162.67   56.80
  -9   6   8   72.20   41.14
   9  -6   8   93.18   43.66
   9  -6   9   26.46   28.99
   6   9   9   11.53   21.74
  -6   9   9   -0.30   35.23
  -6  -9   9  -22.87   26.92
  -9   6   9   -2.05   20.17
  -9  -6   9   15.07   18.46
   9   6   9   34.34   34.37
   6  -9   9   30.55   22.57
   6  -9  10  150.93   58.64
  -9   6  10   69.47   37.59
   9  -6  10   96.54   48.68
  -9  -6  10   66.79   42.17
  -6   9  10   29.45   37.21
   6   9  10   32.66   35.96
  -6  -9  10  118.33   52.79
   9   6  10   87.39   40.57
  -9  -6  11   51.25   40.57
   6   9  11   87.53   46.89
   6  -9  11   28.96   39.35
  -6   9  11   66.18   43.13
  -6  -9  11   63.65   53.66
   9   6  11   45.97   36.11
  -9   6  11  105.60   45.30
  -9   7   0   29.57    4.81
   7   9   0   24.80    6.27
   9   7   0   25.72    7.86
  -7   9   0   28.38    6.00
  -7  -9   1  312.33   26.85
  -9   7   1  296.42   20.65
   9  -7   1  305.30   15.42
   7  -9   1  286.99   18.04
   9   7   1  289.04   23.88
   7   9   1  310.31   26.60
  -7   9   1  293.19   22.48
  -9  -7   1  300.82   24.71
  -9  -7   2 1142.58   54.36
   7  -9   2 1021.06   46.01
   7   9   2 1056.45   53.51
   9  -7   2 1026.73   44.52
  -7  -9   2 1094.45   54.34
  -9   7   2 1043.59   52.52
  -7   9   2 1059.35   50.66
   9   7   2 1067.54   51.36
  -9   7  -2 1022.48   50.42
  -9  -7   2 1093.94   48.50
   7   9   3  533.38   43.83
  -9   7   3  639.97   49.61
   9  -7   3  597.85   44.31
  -9  -7   3  392.95   35.99
  -7   9   3  634.25   47.62
  -9   7  -3  545.97   36.42
  -7  -9   3  584.14   31.05
  -9  -7   3  564.02   33.58
   7  -9   3  616.71   44.48
   9   7   3  648.08   45.66
  -9   7  -4  345.62   28.61
   7  -9   4  420.37   50.57
   9   7   4  486.67   49.47
  -7  -9   4  555.28   52.28
   9  -7   4  485.92   49.64
  -9  -7   4  514.81   53.03
   7   9   4  549.73   52.46
  -9   7   4  531.32   55.07
  -7   9   4  538.30   54.33
   7   9   5   62.65   27.59
  -9  -7   5   67.87   28.99
  -9   7   5   50.25   23.37
   7  -9   5   46.84   23.95
   9  -7   5   45.30   16.75
  -7   9   5   63.38   27.19
  -7  -9   5   36.86   27.39
  -9   7  -5   41.66   10.90
   9   7   5   51.85   22.48
   7   9   6   39.91   21.30
  -7  -9   6   69.26   26.06
   9  -7   6   69.33   28.42
  -7   9   6   53.25   22.78
  -9  -7   6   31.28   22.47
   7  -9   6   29.16   18.73
  -9   7   6   40.24   23.23
   9   7   6   59.08   25.22
  -9  -7   7  284.43   53.45
  -9   7   7  231.31   55.57
  -7   9   7  367.11   62.64
  -7  -9   7  281.34   57.00
   7  -9   7  256.07   53.53
   9  -7   7  262.37   51.27
   7   9   7  267.52   51.26
   9   7   7  247.48   49.42
   7  -9   8  306.94   59.60
   9  -7   8  283.72   55.00
  -7   9   8  189.71   46.26
   9   7   8  273.57   56.88
  -7  -9   8  234.78   54.13
  -9   7   8  255.96   61.55
   7   9   8  211.39   49.16
  -9  -7   8  243.23   54.59
   7  -9   9   53.04   31.37
   7   9   9   -7.86   18.72
  -9  -7   9   13.33   22.54
   9   7   9   36.22   27.06
  -9   7   9   11.74   21.77
  -7  -9   9    9.06   19.43
   9  -7   9   12.29   22.24
  -7   9   9  -18.65   23.04
   7  -9  10   71.12   42.23
   9   7  10   88.74   43.69
   9  -7  10   41.65   39.44
  -9  -7  10  -10.91   19.41
  -7   9  10   74.11   40.61
  -7  -9  10   34.96   36.16
  -9   7  10   74.72   38.07
   7   9  10   42.29   28.40
   9   7  11   18.64   24.71
   7   9  11   49.00   44.43
  -9   7  11   84.07   41.49
  -7  -9  11   75.56   43.70
  -7   9  11  115.47   44.53
  -9  -7  11   31.30   38.90
   7  -9  11   47.48   41.02
   9   8   0   11.75    5.43
  -8   9   0   10.52    4.48
  -9   8   0   15.15    4.67
   8   9   0   17.27    9.05
  -8   9   1  211.07   19.29
  -8  -9   1  218.51   22.75
  -9   8   1  203.88   18.68
   9   8   1  209.63   21.84
   9  -8   1  202.24   13.66
   8  -9   1  185.17   14.51
   8   9   1  223.41   23.02
  -9  -8   1  255.05   24.56
   8   9   2  172.22   23.51
  -8   9   2  188.88   24.27
   9  -8   2  170.07   19.33
   9   8   2  181.10   23.13
  -9  -8   2  150.96   20.28
  -8  -9   2  255.84   30.55
  -9   8   2  183.50   23.39
   8  -9   2  154.35   19.28
  -9  -8   2  214.75   26.62
   8   9   3  120.56   23.31
  -8   9   3  125.96   27.21
  -8  -9   3  117.63   17.64
  -9  -8   3  100.08   15.84
   9  -8   3  108.24   20.14
  -9  -8   3  -68.12   26.77
   8  -9   3   81.25   20.14
  -9   8   3  105.77   21.25
   9   8   3  117.44   22.24
   8   9   4  210.96   35.54
  -9  -8   4  247.28   39.34
   8  -9   4  183.49   32.89
   9  -8   4  197.94   34.85
  -9   8   4  211.25   37.22
  -8   9   4  206.07   37.61
   9   8   4  207.61   32.94
  -9   8  -4  178.03   20.53
  -8  -9   4  214.52   36.63
  -9  -8   5   58.17   28.47
  -8  -9   5   45.14   25.76
  -8   9   5   44.89   23.62
   8   9   5   43.02   22.26
   9  -8   5   55.96   27.37
   9   8   5   59.59   24.43
   8  -9   5   55.07   23.54
  -9   8   5   49.77   31.60
  -8   9   6   53.71   32.72
   8  -9   6   62.88   27.97
   9  -8   6   33.14   24.97
   8   9   6   29.40   24.17
   9   8   6    9.86   20.86
  -8  -9   6   65.49   33.37
  -9   8   6   90.62   35.39
  -9  -8   6   37.63   26.41
   9   8   7  141.32   48.48
   8   9   7  196.73   45.76
  -8   9   7  193.33   53.32
   9  -8   7  175.10   47.19
  -9   8   7  173.70   50.32
   8  -9   7  174.23   46.61
  -8  -9   7  198.23   47.53
  -9  -8   7  226.75   51.40
  -8   9   8  122.48   44.14
   9  -8   8   98.49   44.22
  -9  -8   8   93.84   42.05
  -8  -9   8  121.54   46.80
   9   8   8  105.09   45.16
   8  -9   8   76.02   34.48
   8   9   8  112.06   39.03
  -9   8   8  200.50   54.32
  -8  -9   9   -9.22   19.04
  -8   9   9   68.56   36.59
   9   8   9  -48.03   37.05
   9  -8   9  -12.74   20.09
   8   9   9   -3.39   19.80
  -9   8   9  -13.66   25.43
  -9  -8   9  -24.27   30.98
   8  -9   9   33.54   29.84
   9  -8  10   44.07   33.64
  -8  -9  10   60.66   40.85
  -8   9  10   94.94   45.77
   9   8  10   41.46   37.89
   8  -9  10   51.80   41.84
   8   9  10   79.57   40.02
  -9   8  10   66.15   38.75
  -9  -8  10   59.82   32.60
  -9   8  11   74.59   43.20
   8   9  11   61.17   46.48
  -8  -9  11   64.38   47.24
  -9  -8  11   69.75   39.40
  -8   9  11  147.88   54.15
   9   8  11   73.00   40.23
  -9   9   0   15.57    4.28
   9   9   0   16.98    5.92
   9  -9   1   44.59    6.67
  -9  -9   1   70.59   14.15
  -9   9   1   47.47   10.65
   9   9   1   45.64   11.40
   9   9   2  495.54   37.73
  -9  -9   2  488.70   35.31
   9  -9   2  511.32   31.96
  -9   9   2  504.37   36.05
  -9  -9   2  605.07   42.01
   9   9   3 1453.84   69.60
   9  -9   3 1392.55   66.69
  -9   9   3 1435.64   72.68
  -9  -9   3 1344.47   52.82
  -9  -9   3 1501.26   70.88
   9   9   4  114.63   26.42
  -9  -9   4   50.66   11.22
   9  -9   4   97.17   28.22
  -9   9   4   88.49   27.58
  -9  -9   4   79.20   24.65
  -9   9   5   57.03   25.66
   9   9   5   50.01   22.48
   9  -9   5   30.18   18.17
  -9  -9   5   73.58   24.43
   9   9   6   36.78   24.75
  -9   9   6   35.74   28.13
  -9  -9   6   58.17   26.94
   9  -9   6   58.66   29.70
   9  -9   7  329.01   59.84
  -9   9   7  292.85   56.80
   9   9   7  296.28   53.73
  -9  -9   7  287.27   59.20
   9   9   8  213.14   46.98
   9  -9   8  202.77   52.78
  -9  -9   8  163.79   48.72
  -9   9   8  176.43   47.68
   9   9   9  -24.36   27.86
   9  -9   9   77.21   38.87
  -9   9   9   80.30   37.94
  -9  -9   9  -17.00   18.54
  -9  -9  10  -31.22   27.13
  -9   9  10   51.17   37.49
   9  -9  10   13.49   25.78
   9   9  10   67.99   42.81
  -9  -9  11   36.01   38.76
   9   9  11   -5.62   25.70
  -9   9  11   63.89   43.02
   0  10   0 2855.52   70.63
 -10   0   0 2638.04   42.22
 -10   0   1  538.91   28.84
 -10   0  -1  500.60   33.89
 -10   0   1  523.69   34.89
   0 -10   1  488.91   30.34
  10   0   1  518.17   20.53
   0  10   1  557.89   33.13
   0 -10   2   49.25   11.28
 -10   0  -2   50.90   11.22
 -10   0   2   73.70   13.77
   0  10   2   74.92   14.60
 -10   0   2   82.38   16.36
  10   0   2   82.80   12.04
  10   0   3   96.16   18.94
   0 -10   3   87.89   17.99
 -10   0   3  110.79   24.38
   0  10   3  154.33   30.87
   0  10   4  562.78   49.43
  10   0   4  554.20   44.75
 -10   0   4  600.34   56.60
   0 -10   4  542.69   49.22
 -10   0   5  217.41   39.31
  10   0   5  197.61   33.52
   0  10   5  171.17   30.87
   0 -10   5  196.63   35.14
 -10   0   6  650.19   74.74
   0 -10   6  609.40   66.09
   0  10   6  566.88   67.52
  10   0   6  604.22   65.21
  10   0   7  154.50   38.60
   0  10   7  121.36   40.03
   0 -10   7   70.34   29.13
 -10   0   7  110.68   40.68
   0 -10   8   55.30   32.03
  10   0   8   20.76   26.10
 -10   0   8   60.58   36.89
   0  10   8   74.82   31.44
  10   0   9   97.64   40.96
 -10   0   9  142.82   52.23
   0  10   9  106.84   42.97
   0 -10   9  126.11   48.78
   0  10  10   59.09   30.24
 -10   0  10   71.37   36.87
  10   0  10  116.20   45.47
   0 -10  10  171.25   51.77
 -10   0  11   38.02   41.46
   0  10  11   -0.38   24.12
   0 -10  11   51.95   33.34
  10   0  11  -46.89   34.54
 -10  -1   0   20.65    5.15
 -10   1   0   38.16   11.03
 -10   1   0   24.82    4.45
  -1  10   0   25.38    9.07
 -10   1   0   48.57    6.36
   1  10   0   35.31   15.14
 -10  -1   0   35.06   10.83
 -10  -1   1  478.20   32.62
   1  10   1  391.98   29.32
  -1 -10   1  440.61   30.71
 -10  -1   1  455.87   26.12
 -10   1   1  462.87   27.40
  -1  10   1  462.48   30.64
  10   1   1  444.29   21.05
 -10   1   1  477.70   33.98
   1 -10   1  459.52   28.48
 -10  -1  -1  452.41   32.66
 -10   1  -1  464.78   33.98
  10  -1   1  443.24   17.09
  10  -1   2  295.57   21.28
 -10   1  -2  252.51   25.35
  10   1   2  320.18   23.91
 -10  -1   2  326.61   29.96
   1 -10   2  274.51   24.89
 -10  -1   2  293.48   26.98
  -1 -10   2  267.21   26.01
   1  10   2  295.53   27.91
  -1  10   2  293.36   27.33
 -10   1   2  298.36   32.19
  -1  10   3  333.80   38.58
 -10   1  -3  365.25   32.99
  10   1   3  259.62   27.66
  10  -1   3  265.01   27.58
   1 -10   3  249.26   28.74
 -10  -1   3  349.09   41.86
   1  10   3  388.52   38.66
  -1 -10   3  266.63   30.63
 -10   1   3  407.70   51.12
  10  -1   4  230.34   31.02
   1 -10   4  184.39   31.82
  -1 -10   4  206.81   34.07
   1  10   4  235.93   33.37
 -10  -1   4  227.74   37.56
  10   1   4  242.16   31.89
 -10   1   4  256.94   39.24
  -1  10   4  215.90   35.15
  10  -1   5   18.12   15.97
 -10  -1   5   56.02   23.93
   1 -10   5   19.88   15.29
 -10   1   5   36.00   25.70
  -1  10   5   34.40   21.59
   1  10   5   29.08   20.04
  -1 -10   5   37.92   21.31
  10   1   5   36.13   16.25
  10  -1   6  175.63   40.26
  10   1   6  174.71   37.62
  -1  10   6  185.88   44.78
   1  10   6  163.46   43.63
 -10   1   6  163.15   42.82
 -10  -1   6  171.82   46.85
  -1 -10   6  219.17   44.68
   1 -10   6  204.70   47.00
 -10   1   7  157.70   44.86
   1 -10   7   96.86   35.10
   1  10   7   95.67   38.22
  -1  10   7  158.53   47.11
 -10  -1   7  142.68   45.95
  10  -1   7  124.51   39.61
  10   1   7  123.45   38.02
  -1 -10   7  140.16   42.89
 -10   1   8   88.66   34.53
  10   1   8    3.78   16.51
 -10  -1   8   36.91   32.29
   1 -10   8   81.75   36.58
  10  -1   8   42.02   27.54
  -1 -10   8   35.53   27.98
   1  10   8   57.98   32.35
  -1  10   8   29.39   24.74
  10   1   9   67.65   43.58
 -10  -1   9  161.71   51.07
  -1 -10   9  122.97   46.58
  10  -1   9  140.58   52.69
   1 -10   9  174.86   54.21
   1  10   9   75.24   45.48
  -1  10   9   75.42   46.77
 -10   1   9  167.30   52.72
   1  10  10   39.05   39.83
  -1  10  10   70.29   37.34
   1 -10  10   84.52   44.19
  -1 -10  10   25.72   28.40
  10  -1  10   71.74   41.70
 -10   1  10   66.04   43.51
  10   1  10  106.51   43.13
 -10  -1  10   35.53   33.75
  -1 -10  11   -7.30   23.41
  -1  10  11   75.94   41.72
   1 -10  11   13.51   24.41
 -10   1  11    0.07   25.21
  10  -1  11   29.48   36.32
  10   1  11  -28.38   33.62
   1  10  11   35.00   37.39
 -10  -1  11   73.24   35.62
   2  10   0  204.92   20.84
  -2  10   0  275.62   21.83
 -10  -2   0  258.14   17.08
 -10  -2   0  248.74   23.61
 -10   2   0  259.61   25.64
 -10  -2   1  474.06   32.33
  10   2   1  454.17   22.94
 -10   2   1  424.72   27.55
   2 -10   1  428.37   27.78
 -10   2   1  466.17   34.70
 -10  -2   1  436.23   25.81
  -2  10   1  459.42   29.95
  10  -2   1  436.52   15.28
   2  10   1  462.94   31.86
 -10   2  -1  333.37   29.43
 -10   2  -1  488.92   18.95
  -2 -10   1  432.65   30.54
 -10  -2   2   98.85   17.15
  -2 -10   2  102.35   17.12
  10  -2   2  104.19   12.45
   2 -10   2  111.40   16.59
  -2  10   2  108.00   18.55
   2  10   2  105.43   17.86
 -10  -2   2  110.52   17.77
 -10   2   2   99.62   18.43
  10   2   2  111.73   14.78
 -10   2  -2  104.81   16.90
 -10   2   3  125.51   24.99
 -10  -2   3  125.47   24.89
  -2  10   3  216.02   31.41
  10  -2   3  109.90   18.69
   2  10   3  144.35   25.75
  -2 -10   3  133.63   22.03
   2 -10   3  106.13   20.11
 -10   2  -3  135.59   20.16
  -2 -10   3  124.30    8.96
  10   2   3  102.31   19.17
 -10  -2   4  380.17   45.56
   2 -10   4  333.98   38.40
  -2  10   4  319.56   40.31
  -2 -10   4  389.46   41.91
  10  -2   4  342.13   35.65
   2  10   4  328.71   38.50
 -10   2   4  345.67   45.31
  10   2   4  339.96   36.43
 -10   2  -4  427.51   36.58
   2  10   5  311.68   42.37
 -10   2  -5  327.38   34.75
  -2  10   5  263.19   40.90
 -10  -2   5  337.31   45.38
   2 -10   5  327.69   44.00
  10  -2   5  284.00   40.78
 -10   2   5  296.05   46.67
  10   2   5  330.15   42.91
  -2 -10   5  291.07   41.76
  -2  10   6  557.13   64.21
 -10   2  -6  493.15   46.06
  -2 -10   6  564.32   63.45
  10  -2   6  503.49   60.59
 -10  -2   6  500.72   63.40
  10   2   6  538.42   61.03
   2 -10   6  636.52   68.53
 -10   2   6  579.70   69.97
   2  10   6  488.37   63.91
 -10  -2   7  104.03   37.77
  10  -2   7   56.15   28.97
  -2  10   7  128.90   38.53
  -2 -10   7   49.52   32.30
  10   2   7   95.13   39.13
   2  10   7  109.98   38.45
 -10   2   7   94.06   33.79
   2 -10   7   65.01   32.11
 -10  -2   8   89.77   39.32
  10  -2   8    8.80   23.68
   2  10   8   26.71   23.87
  10   2   8   25.60   24.55
  -2  10   8    1.66   16.12
 -10   2   8    7.85   22.39
   2 -10   8   -9.57   27.35
  -2 -10   8   41.13   30.07
  -2  10   9   51.74   31.99
  10  -2   9  112.82   48.64
  -2 -10   9   87.91   37.32
   2 -10   9   90.55   44.24
 -10  -2   9  142.95   47.89
   2  10   9  100.75   43.26
  10   2   9  104.91   41.56
 -10   2   9   86.10   42.48
  10  -2  10  102.83   49.07
  10   2  10   75.73   39.64
  -2 -10  10   77.60   40.06
  -2  10  10  113.33   45.72
 -10  -2  10  110.78   44.34
 -10   2  10   77.35   39.28
   2  10  10   19.98   20.96
   2 -10  10  115.88   49.48
  -2  10  11   53.96   43.43
 -10   2  11   86.59   39.56
   2  10  11   -0.45   22.60
  -2 -10  11   99.64   45.96
  10   2  11   15.97   24.97
 -10  -2  11    0.07   25.25
   2 -10  11  -23.81   35.57
  10  -2  11   56.02   38.49
 -10   3   0   49.75   13.08
  10   3   0   49.40    9.05
   3  10   0   55.43   11.87
  -3  10   0   57.42   12.03
 -10  -3   0   53.13   13.00
 -10  -3   0   53.64    9.35
   3  10   1  378.62   29.44
 -10  -3   1  388.24   24.91
  -3 -10   1  361.54   29.91
  10   3   1  356.13   22.51
 -10   3  -1  383.71   31.47
 -10  -3   1  421.19   31.61
   3 -10   1  373.08   25.71
  -3  10   1  345.54   26.97
 -10   3   1  346.98   24.81
  -3  10   2  281.27   27.30
   3  10   2  296.21   28.38
 -10   3   2  312.17   31.23
 -10  -3   2  339.65   28.99
  -3 -10   2  270.74   26.48
   3 -10   2  299.89   25.43
 -10   3  -2  292.96   28.34
 -10  -3   2  290.31   26.18
  10   3   2  293.53   24.33
  10  -3   2  296.85   20.66
  -3 -10   3  262.93   15.28
 -10  -3   3  329.96   42.00
   3 -10   3  209.52   25.74
  10   3   3  193.22   25.27
 -10   3   3  255.94   37.63
   3  10   3  202.24   27.11
 -10   3  -3  275.52   30.06
  10  -3   3  211.11   25.06
  -3  10   3  294.40   35.49
  -3 -10   3  253.72   29.06
   3 -10   4   59.42   21.26
   3  10   4   51.75   18.43
 -10   3  -4   73.87   16.61
  -3 -10   4   49.36   18.58
  10   3   4   68.44   19.19
 -10  -3   4   38.37   18.59
  10  -3   4   74.80   19.14
  -3  10   4   49.20   20.42
 -10   3   4   78.06   25.79
  -3  10   5   48.45   25.46
 -10   3  -5    5.76    8.84
  10   3   5   40.08   21.85
 -10  -3   5   53.29   27.53
  10  -3   5   56.00   24.13
   3 -10   5   40.75   22.59
   3  10   5   21.80   19.07
 -10   3   5   27.99   24.06
  -3 -10   5   68.73   24.29
  10   3   6  155.86   35.33
  10  -3   6  143.00   34.32
   3 -10   6  229.89   45.08
 -10  -3   6  193.03   42.48
 -10   3   6  174.18   42.24
  -3 -10   6  165.58   38.19
  -3  10   6  180.52   44.11
 -10   3  -6  179.01   27.82
   3  10   6  110.03   39.63
   3 -10   7  149.20   47.94
  10   3   7  192.18   43.56
 -10  -3   7  200.64   46.32
  10  -3   7  176.88   43.83
  -3  10   7  147.00   41.41
  -3 -10   7  218.54   46.05
 -10   3   7  161.94   48.17
   3  10   7  158.84   45.90
  10  -3   8   26.90   24.87
  -3  10   8   64.85   32.33
 -10   3   8   73.63   38.74
  -3 -10   8   84.25   37.76
  10   3   8   67.09   34.42
   3 -10   8   55.07   32.73
   3  10   8   31.29   27.47
 -10  -3   8  102.49   41.19
  -3  10   9   43.98   36.73
 -10   3   9   24.50   29.89
   3  10   9   35.11   34.32
  -3 -10   9   11.15   17.94
   3 -10   9   77.19   32.71
  10   3   9   37.87   31.23
 -10  -3   9   57.50   34.66
  10  -3   9   54.63   40.52
  10  -3  10   84.14   50.45
  10   3  10   87.48   40.55
   3 -10  10   31.94   30.38
  -3 -10  10   57.37   36.58
  -3  10  10   46.15   26.49
 -10  -3  10   97.22   51.48
 -10   3  10   83.30   42.03
   3  10  10   48.30   38.87
 -10   3  11   92.83   39.99
  10   3  11    3.92   32.70
  -3  10  11   81.25   43.51
 -10  -3  11    0.07   29.75
  -3 -10  11   51.38   39.81
  10  -3  11   34.39   32.33
   3 -10  11  -17.82   23.86
   3  10  11  -16.80   29.61
  10   4   0 1275.16   42.88
  -4  10   0 1249.70   43.65
   4  10   0 1206.99   49.35
  -4  10   1  523.48   31.64
   4 -10   1  467.70   28.25
 -10   4   1  483.20   28.25
   4  10   1  510.73   34.34
 -10  -4   1  434.09   32.99
 -10  -4   1  483.57   28.44
 -10   4  -1  465.02   35.26
  10   4   1  496.44   27.83
  -4 -10   1  563.22   34.05
 -10  -4   2  141.05   20.71
 -10   4   2  139.71   21.67
  10   4   2  121.37   16.59
  -4  10   2  135.85   20.94
   4  10   2  124.81   18.93
 -10   4  -2  118.16   18.27
   4 -10   2  121.29   16.10
  -4 -10   2  135.84   20.74
 -10  -4   2  106.77   17.90
  10  -4   2  126.03   14.78
 -10  -4   3   67.66   12.67
   4  10   3   50.28   14.44
  10   4   3   71.80   14.76
 -10   4  -3   92.18   18.65
  -4  10   3   66.82   19.20
  -4 -10   3   64.94   16.82
 -10   4   3   82.55   21.49
   4 -10   3   62.00   15.87
  10  -4   3   66.90   16.44
  -4 -10   3   79.08   10.05
 -10  -4   3   84.42   19.77
  -4  10   4  202.51   31.44
 -10   4  -4  246.31   27.64
  10   4   4  231.85   32.13
   4  10   4  229.77   34.21
  -4 -10   4  210.50   32.73
  10  -4   4  215.27   30.17
 -10   4   4  223.50   36.69
 -10  -4   4  226.19   36.25
   4 -10   4  180.85   30.67
 -10   4  -5  322.87   32.65
 -10   4   5  368.80   49.97
   4 -10   5  309.23   45.24
   4  10   5  319.27   41.90
 -10  -4   5  380.45   50.10
  10  -4   5  304.20   41.81
  -4 -10   5  328.31   46.15
  -4  10   5  329.20   46.36
  10   4   5  341.81   43.15
  -4 -10   6  288.29   45.28
  10  -4   6  244.80   43.88
   4 -10   6  300.24   49.37
  -4  10   6  253.71   44.98
   4  10   6  199.09   41.66
 -10   4   6  279.61   48.62
 -10   4  -6  212.05   28.05
 -10  -4   6  262.34   47.02
  10   4   6  244.21   40.06
  -4  10   7   41.65   33.69
  -4 -10   7   71.85   38.66
   4  10   7   74.49   36.68
   4 -10   7   38.52   31.98
 -10  -4   7   72.58   34.80
  10   4   7   94.06   33.83
  10  -4   7   83.06   35.73
 -10   4   7   78.09   38.02
  10   4   8   36.13   29.11
  10  -4   8   20.81   16.36
  -4 -10   8   75.78   31.68
 -10   4   8   99.22   41.51
   4 -10   8   37.93   31.06
   4  10   8   28.01   19.08
 -10  -4   8   62.33   35.86
  -4  10   8   41.12   30.91
  10  -4   9   56.94   31.39
 -10  -4   9   60.68   34.53
  -4 -10   9   45.58   30.64
   4  10   9   42.19   35.32
  -4  10   9   14.75   24.60
 -10   4   9   64.84   36.75
  10   4   9   41.90   28.04
   4 -10   9   54.10   32.78
  -4  10  10  101.49   41.71
 -10   4  10   81.27   35.34
   4  10  10  170.50   51.71
  -4 -10  10  115.04   47.33
   4 -10  10  104.33   48.17
  10   4  10   65.25   39.76
 -10  -4  10   55.55   42.69
  10  -4  10   77.55   40.42
 -10   4  11   31.14   38.04
   4 -10  11    5.37   23.06
 -10  -4  11   56.40   32.95
  -4  10  11   48.57   32.47
  10   4  11   84.73   44.27
   4  10  11   68.29   43.17
  -4 -10  11   57.35   37.73
  10   5   0   27.82    7.70
   5  10   0   25.89    9.55
  -5  10   0   33.82    8.34
  10   5   1  103.37   14.26
 -10  -5   1  119.63   16.38
 -10  -5   1  116.34   15.48
  -5 -10   1  131.57   17.77
   5 -10   1  116.17   14.20
 -10   5   1  110.40   13.33
  -5  10   1   99.70   14.85
   5  10   1  123.86   18.63
 -10   5  -1  102.87   17.05
 -10  -5   2  235.74   25.16
 -10   5   2  218.71   25.42
 -10   5  -2  214.07   24.04
  10   5   2  210.54   21.61
  10  -5   2  205.92   19.07
   5  10   2  213.85   24.38
 -10  -5   2  201.37   22.59
  -5 -10   2  207.53   23.64
  -5  10   2  222.09   24.89
   5 -10   2  208.60   20.81
 -10  -5   3  100.89   16.20
 -10   5  -3   99.29   19.05
   5 -10   3  100.15   18.77
 -10   5   3   76.82   23.90
  -5 -10   3   96.30   11.53
  10   5   3   86.15   18.36
 -10  -5   3  142.22   26.28
  -5 -10   3  100.08   18.86
   5  10   3   96.61   20.97
  -5  10   3   79.59   17.31
  10  -5   3  100.43   19.05
   5 -10   4  141.86   28.82
 -10  -5   4  195.31   32.93
 -10   5  -4  141.87   21.34
  -5  10   4  179.08   33.04
   5  10   4  189.72   33.24
  10   5   4  156.82   29.23
  -5 -10   4  215.99   35.62
  10  -5   4  126.90   26.91
 -10   5   4  160.58   32.86
   5  10   5   97.52   29.22
  10  -5   5   88.80   26.27
  -5  10   5  129.20   36.53
 -10  -5   5  105.76   30.33
   5 -10   5   81.00   25.77
 -10   5  -5   76.18   16.77
 -10   5   5   92.12   30.07
  -5 -10   5  137.35   35.32
  10   5   5  112.91   30.20
 -10  -5   6   61.45   26.70
  -5  10   6   38.03   30.46
 -10   5   6   35.58   25.77
  -5 -10   6   61.91   28.26
  10  -5   6   31.74   25.48
  10   5   6   25.00   17.31
   5 -10   6   56.86   25.34
   5  10   6   22.53   21.16
   5 -10   7  197.87   51.33
 -10   5   7  209.25   50.03
  -5  10   7  153.50   42.05
  -5 -10   7  216.07   45.14
   5  10   7  140.95   40.59
  10   5   7  153.25   43.25
 -10  -5   7  212.39   51.30
  10  -5   7  190.13   43.26
  10  -5   8   65.01   34.12
   5  10   8   71.67   33.37
   5 -10   8   86.77   38.55
  -5  10   8   34.94   30.46
  -5 -10   8   78.19   39.43
 -10   5   8   48.02   33.82
  10   5   8   87.76   37.17
 -10  -5   8   82.73   37.66
   5 -10   9   10.22   21.85
 -10  -5   9  -10.58   19.03
 -10   5   9   20.68   24.84
  10  -5   9   29.03   29.21
  10   5   9   73.41   33.89
   5  10   9  -32.94   24.39
  -5 -10   9  -13.34   18.23
  -5  10   9   -5.84   25.07
  -5  10  10   62.03   41.27
  -5 -10  10   88.95   43.69
   5  10  10   61.94   37.90
  10  -5  10   23.29   28.33
  10   5  10   87.29   44.88
 -10   5  10   18.61   31.38
 -10  -5  10   27.73   26.87
   5 -10  10  130.99   51.87
 -10   5  11  -30.07   28.38
 -10  -5  11   40.92   36.51
  10   5  11   24.70   37.14
   5 -10  11   22.03   32.21
  -5 -10  11   57.21   41.19
  -5  10  11   40.27   37.17
   5  10  11   43.92   44.05
   6  10   0  144.24   17.95
 -10   6   0  149.26    8.40
  -6  10   0  150.21   14.82
  10  -6   0  142.49    9.54
  10   6   0  143.65   16.50
  -6  10   1  192.99   20.75
  -6 -10   1  196.45   23.32
  10   6   1  202.02   19.89
  10  -6   1  162.91   10.65
 -10   6   1  182.19   16.51
 -10  -6   1  205.57   20.49
 -10  -6   1  182.84   21.60
 -10   6  -1  191.07   23.79
   6  10   1  211.53   22.95
   6 -10   1  185.10   16.68
   6 -10   2  283.92   24.34
 -10  -6   2  290.10   26.45
  10   6   2  307.66   27.21
 -10   6   2  319.38   29.81
  -6  10   2  329.61   29.21
  -6 -10   2  319.17   28.34
   6  10   2  308.38   30.13
  10  -6   2  298.72   23.94
 -10  -6   2  329.36   30.48
 -10   6  -2  276.31   28.92
  -6 -10   3    1.07   16.11
  10  -6   3   56.68   15.14
   6 -10   3   65.91   16.30
 -10   6   3   79.15   19.88
 -10   6  -3   53.82   14.03
  -6 -10   3   60.71    9.74
 -10  -6   3   56.89   13.08
   6  10   3   56.57   16.27
  10   6   3   52.55   16.32
  -6  10   3   58.29   17.59
 -10  -6   4  555.69   55.18
 -10   6  -4  540.65   39.27
   6 -10   4  500.95   50.58
 -10   6   4  574.57   59.14
   6  10   4  554.87   52.61
  -6  10   4  620.07   55.38
  10   6   4  585.51   50.24
  10  -6   4  508.20   48.80
  -6 -10   4  577.92   56.28
   6  10   5  291.50   44.67
 -10   6   5  408.66   53.35
   6 -10   5  408.79   48.94
 -10  -6   5  383.68   50.08
 -10   6  -5  330.03   29.68
  -6 -10   5  341.28   46.18
  10   6   5  355.33   46.98
  -6  10   5  432.57   51.82
  10  -6   5  340.74   46.71
 -10   6   6   71.50   27.72
 -10  -6   6   89.76   30.44
  10  -6   6   79.76   29.51
   6  10   6   42.95   21.50
   6 -10   6   45.43   23.21
  -6 -10   6   47.73   22.38
  10   6   6   87.99   30.03
  -6  10   6   73.18   33.04
  10   6   7   90.24   37.11
 -10   6   7   87.58   39.23
   6  10   7   92.48   33.35
 -10  -6   7   65.20   37.69
   6 -10   7   83.15   40.66
  -6  10   7  132.98   39.44
  10  -6   7  111.66   37.29
  -6 -10   7   72.31   37.21
   6  10   8   59.07   33.03
  -6 -10   8   37.54   29.60
 -10  -6   8   43.65   36.11
 -10   6   8   23.75   26.41
  10   6   8   42.89   33.50
   6 -10   8   24.89   27.48
  -6  10   8   60.67   30.78
  10  -6   8   82.65   35.77
  -6 -10   9  -41.09   33.18
   6 -10   9  -53.13   37.47
   6  10   9    5.22   18.39
 -10  -6   9  -20.01   19.69
  -6  10   9  -72.79   37.18
  10  -6   9   22.63   29.89
 -10   6   9   -4.30   26.44
  10   6   9   12.11   25.21
 -10  -6  10  115.66   45.41
   6 -10  10   98.72   46.65
   6  10  10   72.32   42.24
  -6 -10  10   53.21   33.34
  10   6  10  140.08   46.94
  -6  10  10   97.64   42.88
  10  -6  10   31.90   31.81
 -10   6  10  125.79   49.76
  -6  10  11   30.24   24.35
   6 -10  11   37.34   35.56
 -10   6  11   36.26   31.43
  10   6  11   53.48   37.44
  -6 -10  11   42.42   38.70
 -10  -6  11   49.04   33.89
   6  10  11   18.69   40.94
 -10   7   0   33.09    4.99
  10   7   0   33.28    9.12
   7  10   0   33.46    9.43
  -7  10   0   37.12    8.09
   7  10   1   91.56   15.77
  -7  10   1   96.25   14.42
   7 -10   1   79.51   11.41
  -7 -10   1  112.96   17.90
  10   7   1   97.58   14.25
 -10   7   1   95.66   12.11
  10  -7   1   94.32    8.29
 -10  -7   1  105.50   15.75
   7  10   2  228.98   26.55
 -10   7  -2  213.62   27.17
 -10  -7   2  239.34   26.11
  -7  10   2  259.79   26.49
  10   7   2  261.09   26.53
 -10   7   2  286.11   29.69
   7 -10   2  211.66   22.26
 -10  -7   2  270.18   30.31
  -7 -10   2  247.96   25.95
  10  -7   2  227.48   21.42
 -10  -7   3   29.14   10.53
  -7 -10   3   18.29    7.85
  10   7   3   52.40   16.12
  10  -7   3   38.65   14.16
  -7 -10   3  -16.30    9.52
  -7  10   3   20.35   14.57
   7 -10   3   43.47   15.67
 -10   7   3   45.75   19.03
 -10  -7   3   -4.02   18.17
 -10   7  -3   34.49   12.97
   7  10   3   44.24   16.95
  -7 -10   4  636.61   55.65
  -7  10   4  571.43   53.46
 -10   7  -4  453.59   34.08
 -10  -7   4  504.73   51.54
  10  -7   4  519.17   50.46
   7 -10   4  498.08   48.68
  -7 -10   4  435.37   26.54
   7  10   4  543.19   51.28
 -10   7   4  576.66   56.51
  10   7   4  559.84   50.46
 -10  -7   5   59.53   22.36
  -7 -10   5   65.00   27.18
  10   7   5   48.01   23.16
  -7  10   5   42.84   25.94
 -10   7  -5   37.24   11.08
   7  10   5   55.66   23.45
 -10   7   5   29.38   24.89
  10  -7   5   55.08   26.33
   7 -10   5   43.53   19.78
   7  10   6   82.66   30.70
   7 -10   6  110.11   32.45
 -10   7   6   53.31   27.14
  10  -7   6  100.64   32.64
  -7 -10   6   71.75   27.60
  10   7   6   63.76   25.36
  -7  10   6   73.94   28.17
 -10  -7   6   90.26   31.62
  -7  10   7  191.05   47.07
  -7 -10   7  232.73   47.37
  10   7   7  154.65   40.07
   7  10   7  153.56   42.15
   7 -10   7  178.42   49.29
 -10  -7   7  134.04   43.71
  10  -7   7  143.82   42.73
 -10   7   7  202.30   50.80
  10   7   8   75.27   37.17
  -7  10   8   42.72   32.02
 -10  -7   8   50.66   36.92
   7 -10   8  108.30   45.66
 -10   7   8  117.88   41.74
  10  -7   8    9.91   19.73
  -7 -10   8  106.12   39.40
   7  10   8    8.94   27.14
   7  10   9   55.48   32.53
  -7 -10   9  -17.56   27.25
  10   7   9   48.66   23.84
   7 -10   9   -6.50   19.85
  -7  10   9  -61.66   31.24
 -10   7   9  -14.50   21.62
  10  -7   9   34.64   28.90
 -10  -7   9   54.00   30.06
  10  -7  10   32.74   39.59
  -7 -10  10   75.17   40.35
 -10  -7  10   58.57   36.75
  10   7  10   72.00   38.68
   7  10  10   24.50   36.19
   7 -10  10   28.47   27.43
 -10   7  10   50.62   42.59
  -7  10  10   68.75   45.31
 -10   7  11   72.80   43.11
  -7 -10  11   76.82   42.95
  -7  10  11   42.12   40.22
   7  10  11   94.93   45.73
 -10  -7  11   50.09   37.72
  10   7  11   39.15   40.27
   8  10   0  559.67   35.10
 -10   8   0  535.19   20.64
  -8  10   0  542.73   26.53
  10   8   0  536.42   34.41
  10  -8   1  200.73   13.04
  -8  10   1  218.07   19.82
  -8 -10   1  223.99   24.13
 -10  -8   1  208.49   21.65
 -10   8   1  220.09   18.74
   8  10   1  215.60   22.73
  10   8   1  230.01   21.96
   8 -10   1  183.84   15.89
  -8 -10   2  104.93   18.41
  10  -8   2   69.47   11.95
  -8  10   2   81.37   16.53
   8  10   2   80.17   16.77
 -10  -8   2   67.91   14.73
 -10   8   2   90.16   17.52
   8 -10   2   66.36   12.71
  10   8   2   73.81   14.71
 -10  -8   2  102.00   20.02
 -10  -8   3   41.36   11.33
  -8  10   3   35.25   13.59
   8 -10   3   42.88   13.68
 -10   8   3   30.43   13.87
   8  10   3   39.64   15.54
 -10   8  -3   30.39   10.45
  10  -8   3   39.37   13.11
  10   8   3   30.12   14.16
  -8 -10   3   34.60    9.73
  -8 -10   4  192.48   19.28
  -8 -10   4  253.57   39.46
 -10  -8   4  232.65   35.50
  -8  10   4  223.54   34.95
   8 -10   4  217.02   34.40
  10  -8   4  211.48   35.91
 -10  -8   4  194.03   23.90
   8  10   4  192.65   33.04
  10   8   4  213.97   32.54
 -10   8  -4  192.81   23.10
 -10   8   4  199.20   35.04
 -10  -8   5  244.29   41.50
  10   8   5  250.15   37.56
 -10   8  -5  202.59   21.28
  -8  10   5  221.61   40.52
  10  -8   5  242.43   40.46
 -10   8   5  179.40   34.67
   8  10   5  219.83   36.94
  -8 -10   5  239.69   38.60
   8 -10   5  240.80   37.83
  -8  10   6  215.44   42.39
  -8 -10   6  228.83   43.99
   8 -10   6  229.31   44.34
 -10  -8   6  193.28   39.42
  10   8   6  253.00   43.87
 -10   8   6  208.36   47.80
  10  -8   6  210.78   43.30
   8  10   6  219.50   43.34
 -10   8   7  159.55   46.11
  -8  10   7   86.43   40.80
   8  10   7  127.76   39.55
   8 -10   7  168.30   44.48
 -10  -8   7  132.40   43.89
  -8 -10   7   75.82   37.02
  10   8   7  117.86   43.40
  10  -8   7  128.52   38.94
   8  10   8   57.12   31.67
 -10  -8   8   33.28   16.58
   8 -10   8   41.73   28.70
  -8 -10   8   50.81   38.05
 -10   8   8   51.67   36.05
  10  -8   8   91.27   36.94
  -8  10   8   36.15   26.03
  10   8   8   10.57   24.39
  -8 -10   9  -30.38   30.49
   8 -10   9   41.84   31.16
 -10   8   9   20.83   19.80
   8  10   9   14.64   27.64
 -10  -8   9  -20.79   27.09
  10  -8   9    8.68   26.04
  10   8   9  -22.74   26.64
  -8  10   9    3.99   19.18
  10  -8  10   57.43   42.79
  -8 -10  10   75.54   40.77
   8 -10  10   38.14   37.09
  -8  10  10  101.96   46.88
 -10   8  10   82.56   42.27
   8  10  10   29.84   28.43
  10   8  10   38.88   33.20
 -10  -8  10   78.34   39.02
   8  10  11   26.87   28.52
 -10  -8  11   21.37   27.71
 -10   8  11   70.47   45.10
  -8  10  11   50.32   41.24
  -8 -10  11  108.26   51.52
  10   8  11   19.48   25.04
  10   9   0    4.13    7.45
   9  10   0    9.91    7.11
 -10   9   0   -6.79    3.36
  -9  10   0    2.44    3.87
  -9  10   1   30.92    8.84
  -9 -10   1   33.16   10.68
 -10   9   1   31.82    7.88
   9  10   1   22.72    7.99
   9 -10   1   21.71    5.48
  10   9   1   28.62    9.49
 -10  -9   1   19.21    9.65
  10  -9   1   24.89    5.15
  10  -9   2  107.05   14.86
 -10  -9   2  173.02   26.04
 -10   9   2  124.18   19.62
   9 -10   2  105.79   15.44
 -10  -9   2  106.13   19.17
  -9 -10   2  164.21   24.62
   9  10   2  111.11   20.02
  10   9   2   95.83   17.79
  -9  10   2  118.46   18.07
  10  -9   3   99.37   21.02
  10   9   3  111.92   23.65
   9  10   3  128.90   24.01
 -10   9   3  152.30   34.27
  -9  10   3  116.62   24.07
  -9 -10   3  257.64   35.31
  -9 -10   3  129.19   19.01
 -10  -9   3  284.07   39.94
   9 -10   3  115.37   22.27
 -10  -9   3  144.75   21.56
  10  -9   4  118.45   24.39
 -10  -9   4  106.88   15.98
   9  10   4  125.84   26.67
  -9  10   4  129.77   31.39
 -10   9   4  118.62   25.87
  -9 -10   4  109.16   15.35
   9 -10   4  115.52   26.40
  10   9   4  140.42   27.97
 -10  -9   4  120.66   27.15
  -9 -10   4  136.67   28.12
   9 -10   5   40.63   23.15
 -10  -9   5   15.62   20.12
  10   9   5   38.83   19.25
 -10   9   5   25.85   23.40
  -9 -10   5   28.78   18.59
  10  -9   5   29.16   16.89
   9  10   5   32.67   20.56
  -9  10   5   38.91   24.22
   9  10   6  129.20   37.67
  -9 -10   6  147.37   40.54
 -10  -9   6   90.61   30.23
   9 -10   6  108.05   32.86
 -10   9   6   80.85   32.70
  10   9   6   95.79   35.94
  -9  10   6  130.55   38.58
  10  -9   6  115.24   31.93
   9 -10   7  150.28   43.71
  10   9   7  181.26   47.15
   9  10   7  207.26   48.10
 -10   9   7  130.63   44.03
  10  -9   7  151.69   40.43
  -9 -10   7  166.51   44.99
  -9  10   7  181.06   47.87
 -10  -9   7  172.42   46.48
  -9 -10   8   86.48   37.52
  -9  10   8   60.78   32.44
   9  10   8   33.81   27.37
 -10   9   8   51.12   29.41
  10  -9   8   44.34   28.07
  10   9   8   15.08   22.69
   9 -10   8   44.24   30.20
 -10  -9   8   14.58   22.10
  10  -9   9   52.37   37.01
   9 -10   9   84.46   39.99
   9  10   9   49.05   32.07
  -9 -10   9   34.60   29.43
  10   9   9   57.23   44.21
 -10   9   9   44.05   27.00
  -9  10   9   78.38   41.84
 -10  -9   9   67.12   37.28
  -9  10  10   87.59   40.15
   9  10  10   47.35   38.21
   9 -10  10    5.06   26.24
  10   9  10   85.97   48.10
 -10  -9  10    1.95   26.90
 -10   9  10  -15.34   27.27
  -9 -10  10   63.47   32.88
  10  -9  10   14.53   30.21
  10   9  11   20.88   31.06
   9  10  11   52.02   38.00
  -9  10  11   11.44   26.88
  -9 -10  11  -10.87   24.65
 -10   9  11   90.58   43.68
 -10  -9  11   26.48   25.70
  10  10   0  509.90   36.67
 -10  10   0  547.58   25.12
  10  10   1  138.69   18.83
  10 -10   1  156.13   12.97
 -10  10   1  161.68   16.38
 -10 -10   1  175.93   21.19
 -10 -10   2   95.19   17.00
  10  10   2   87.64   17.16
  10 -10   2  104.76   15.28
 -10  10   2  101.94   16.70
  10 -10   3  118.70   21.63
  10  10   3  124.74   23.36
 -10 -10   3  140.08   19.67
 -10 -10   3  168.40   28.11
 -10  10   3  101.49   22.32
  10 -10   4  256.17   35.60
 -10 -10   4  234.23   35.88
  10  10   4  228.78   33.90
 -10 -10   4  210.68   21.84
 -10  10   4  251.26   37.05
  10  10   5  291.18   41.13
  10 -10   5  260.76   40.79
 -10  10   5  260.74   43.95
 -10 -10   5  259.56   39.56
  10  10   6  684.14   69.87
 -10 -10   6  592.77   69.39
 -10  10   6  613.24   70.55
  10 -10   6  638.22   69.14
  10 -10   7  130.85   46.75
 -10 -10   7  183.10   48.01
 -10  10   7  102.47   41.98
  10  10   7  123.00   37.72
  10 -10   8   20.33   24.30
 -10 -10   8   63.53   35.63
 -10  10   8  -39.91   30.24
  10  10   8   32.41   27.59
  10 -10   9  161.63   47.25
  10  10   9  148.70   49.70
 -10 -10   9  132.50   49.71
 -10  10   9  164.92   57.09
  10  10  10   43.63   39.64
 -10 -10  10   31.11   27.38
  10 -10  10   18.00   25.72
 -10  10  10    9.43   26.77
 -10  10  11   39.88   34.07
 -10 -10  11    2.41   22.01
  10  10  11  -23.90   27.65
 -11   0   0   32.42    8.85
   0  11   0   37.03   17.49
 -11   0   0   20.47   17.55
 -11   0  -1  424.14   33.86
 -11   0   1  445.10   27.44
   0  11   1  379.34   27.78
  11   0   1  382.69   18.13
 -11   0   1  435.02   33.79
   0 -11   1  419.29   31.37
   0  11   2  153.51   20.96
   0 -11   2  148.66   20.58
 -11   0   2  155.28   21.25
 -11   0  -2  133.30   18.90
 -11   0   2  150.86   21.07
  11   0   2  162.31   16.50
 -11   0   3  255.09   36.22
  11   0   3  249.21   30.57
   0 -11   4  333.61   40.70
  11   0   4  300.22   35.85
   0  11   4  326.39   39.35
 -11   0   4  325.37   44.51
   0  11   5    5.68   11.60
 -11   0   5   18.75   18.97
  11   0   5   21.01   18.03
   0 -11   5    4.25   15.69
   0 -11   6  178.46   42.45
   0  11   6  144.03   44.14
  11   0   6  165.83   39.57
 -11   0   6  223.17   55.25
  11   0   7  145.31   45.02
 -11   0   7  171.99   46.84
   0  11   7  161.37   40.43
   0 -11   7  184.72   47.44
 -11   0   8   50.64   35.87
   0 -11   8   68.32   35.55
   0  11   8   40.10   35.11
  11   0   8    3.89   22.95
   0 -11   9  141.49   49.66
 -11   0   9  172.86   56.58
   0  11   9  104.07   51.12
  11   0   9   97.82   45.32
   0  11  10   85.59   45.28
 -11   0  10  132.52   53.00
   0 -11  10  103.17   44.46
  11   0  10   84.32   41.32
 -11   0  11   75.65   45.04
   0 -11  11   28.44   36.51
   0  11  11  -19.36   25.94
   1  11   0   13.35    8.08
  -1  11   0    1.76    3.81
 -11   1   0    7.72    6.52
 -11  -1   0   -2.60    5.08
 -11  -1   0    2.12    2.23
 -11   1   0    4.38    2.48
 -11   1   1  518.36   29.82
  -1  11   1  492.41   32.08
 -11  -1  -1  533.94   36.60
  11  -1   1  475.32   18.18
   1 -11   1  512.49   31.53
  11   1   1  497.37   22.80
 -11  -1   1  557.12   37.79
 -11  -1   1  505.44   28.75
  -1 -11   1  502.88   32.34
 -11   1  -1  541.30   37.65
   1  11   1  505.52   33.70
 -11   1   1  538.60   37.90
 -11   1  -2 1011.29   52.67
  11   1   2 1060.75   42.31
  -1  11   2 1039.17   51.85
  -1 -11   2  998.26   48.21
 -11  -1   2 1015.44   51.66
 -11  -1   2 1042.04   51.64
   1  11   2 1022.11   52.19
  11  -1   2 1017.38   39.33
 -11   1   2 1017.65   54.63
   1 -11   2  966.90   48.36
  11   1   3 5066.08  114.59
  -1 -11   3 4223.56  116.55
  11  -1   3 5005.09  113.83
 -11   1   3 4828.08  141.75
 -11  -1   3 4761.28  134.28
 -11   1  -3 4544.32  117.27
   1 -11   3 4795.38  121.12
  -1  11   4  440.99   43.96
   1 -11   4  399.43   43.32
  -1 -11   4  426.58   45.62
 -11   1   4  453.08   50.97
 -11  -1   4  454.61   49.76
  11  -1   4  449.23   42.65
   1  11   4  461.25   45.63
  11   1   4  436.19   42.07
 -11  -1   5   23.64   19.74
   1 -11   5   24.61   19.43
   1  11   5   29.36   16.57
  11  -1   5   23.23   14.11
  -1  11   5   30.57   23.13
 -11   1   5   41.50   17.93
  -1 -11   5   36.45   20.95
  11   1   5   14.16   12.89
   1  11   6  124.28   40.15
  11   1   6  131.48   37.23
   1 -11   6  111.48   36.55
  -1 -11   6  152.30   40.71
 -11  -1   6  134.17   45.34
  -1  11   6   88.06   35.35
  11  -1   6   96.32   31.20
 -11   1   6  142.70   44.16
  11  -1   7  357.22   55.90
 -11  -1   7  433.49   65.55
   1  11   7  439.45   60.50
  -1 -11   7  465.54   66.02
  -1  11   7  330.45   58.29
   1 -11   7  458.00   66.43
  11   1   7  374.38   57.95
 -11   1   7  438.14   65.53
  -1 -11   8  148.69   42.09
   1 -11   8   88.56   33.08
   1  11   8   98.67   31.50
  11  -1   8  111.91   40.00
 -11  -1   8  123.18   41.49
  -1  11   8  143.51   39.24
  11   1   8  136.55   39.64
 -11   1   8  138.78   46.04
   1  11   9  160.30   51.10
  -1 -11   9  114.71   44.39
  -1  11   9  144.14   46.56
 -11  -1   9   80.28   39.91
  11   1   9  149.74   47.12
 -11   1   9  169.45   52.91
   1 -11   9  155.18   54.02
  11  -1   9  137.75   49.65
  11   1  10   26.92   30.12
   1 -11  10   72.30   46.55
 -11   1  10   43.62   38.62
  -1  11  10   52.62   36.47
  11  -1  10   59.53   40.55
   1  11  10   58.11   41.83
 -11  -1  10   16.46   26.05
  -1 -11  10  139.67   52.31
  -1 -11  11   10.16   31.51
 -11  -1  11   36.81   30.63
  -1  11  11   72.19   38.74
   1  11  11  -24.06   35.32
   1 -11  11   -7.62   27.21
  11   1  11   40.01   31.44
 -11   1  11   61.31   36.92
   2  11   0   18.57    8.21
  -2  11   0    6.90    5.69
 -11  -2   0   -1.96    4.33
 -11   2   0    7.69   15.16
 -11   2   0    7.60    2.80
 -11  -2   0   -0.19    2.54
 -11   2  -1  184.45   24.99
  11   2   1  191.35   15.62
 -11  -2  -1  190.81   22.13
   2  11   1  181.69   21.74
  -2 -11   1  181.31   20.64
 -11  -2   1  216.95   20.02
  -2  11   1  168.68   20.09
   2 -11   1  175.53   19.64
  11  -2   1  184.60    9.90
 -11  -2   1  204.04   25.04
 -11   2   1  206.26   20.10
 -11   2   1  208.64   25.52
  11   2   2   83.68   13.58
   2 -11   2   78.54   16.13
 -11  -2   2   93.79   15.45
  -2 -11   2   87.24   17.60
  -2  11   2   82.32   16.55
 -11   2  -2   67.60   16.08
 -11  -2   2   83.12   16.70
   2  11   2   68.77   14.39
 -11   2   2   73.92   17.12
  11  -2   2   79.55   11.44
 -11  -2   3  302.61   36.83
 -11   2  -3  353.23   33.60
  11  -2   3  277.03   30.41
 -11   2   3  274.54   38.27
  -2  11   3  307.70   34.95
  11   2   3  282.65   31.79
  -2 -11   3  347.56   40.44
   2 -11   3  386.10   39.89
 -11   2   4  235.02   38.76
 -11   2  -4  248.65   29.84
   2 -11   4  226.27   33.12
 -11  -2   4  277.68   40.99
  -2 -11   4  250.72   35.01
  -2  11   4  280.28   35.37
   2  11   4  239.31   34.66
  11   2   4  258.87   32.79
  11  -2   4  214.92   30.23
  11  -2   5   16.24   14.50
 -11  -2   5   26.84   19.31
   2 -11   5   15.68   19.70
  11   2   5   39.91   17.93
 -11   2   5   58.97   30.45
  -2  11   5   26.78   23.76
 -11   2  -5   26.14   15.53
  -2 -11   5   19.29   17.00
   2  11   5   20.38   17.94
  -2  11   6  152.47   42.33
  11   2   6  112.90   37.79
 -11   2  -6  198.16   33.60
 -11   2   6  186.92   50.26
   2  11   6  160.00   40.02
  -2 -11   6  150.71   45.53
 -11  -2   6  169.82   51.17
  11  -2   6  134.09   37.69
   2 -11   6  148.06   41.49
  -2 -11   7  166.83   41.94
 -11   2   7  101.10   43.13
 -11  -2   7  121.35   41.94
  11  -2   7  163.69   43.49
   2  11   7  118.58   37.49
  -2  11   7   82.48   33.56
  11   2   7  117.79   36.79
   2 -11   7  118.50   39.46
  -2 -11   8   34.80   22.90
  11  -2   8   60.23   33.66
 -11   2   8   30.15   31.62
  11   2   8   27.33   25.78
   2 -11   8   94.92   36.04
 -11  -2   8   64.04   42.38
  -2  11   8   50.52   36.00
   2  11   8   47.27   27.25
   2  11   9  108.09   46.48
 -11  -2   9   87.18   41.14
  11   2   9  103.15   38.62
   2 -11   9  107.63   45.58
  -2 -11   9   99.62   47.90
  11  -2   9  102.70   48.74
  -2  11   9   75.99   41.25
 -11   2   9  112.71   48.64
 -11  -2  10   12.55   28.99
   2  11  10   64.31   38.79
  11  -2  10   45.24   39.08
  -2 -11  10   45.82   39.17
  -2  11  10   63.98   43.47
 -11   2  10   38.24   35.76
  11   2  10   50.51   36.47
   2 -11  10   43.10   40.67
  11   2  11   17.14   26.09
 -11   2  11   19.78   36.87
   2 -11  11  -14.57   32.56
 -11  -2  11    0.35   30.32
  -2 -11  11   43.36   34.97
   2  11  11  -10.37   30.80
  -2  11  11   77.59   50.15
 -11   3   0   20.46    8.86
  -3  11   0    2.49    4.12
 -11  -3   0    8.57    5.29
 -11  -3   0    5.52    3.33
   3  11   0    1.95    6.19
  -3  11   1  107.61   16.82
 -11  -3   1  132.79   17.59
  11   3   1  111.62   13.70
   3 -11   1  118.78   16.06
 -11   3   1  139.28   22.40
 -11   3   1  106.18   15.06
   3  11   1  113.27   18.26
 -11  -3   1  150.46   22.06
 -11   3  -1  131.91   21.70
  -3 -11   1  115.48   16.83
  11   3   2  691.34   36.47
 -11   3   2  688.95   46.30
 -11  -3   2  716.30   42.03
   3  11   2  671.67   42.76
  -3 -11   2  673.92   41.17
 -11  -3   2  763.35   42.72
  11  -3   2  699.96   31.57
  -3  11   2  639.81   41.16
 -11   3  -2  738.31   44.95
   3 -11   2  702.94   40.56
  11  -3   3 3007.70   87.90
 -11   3  -3 2902.38   91.82
   3  11   3 3055.69  101.99
 -11   3   3 3049.06  112.45
  -3  11   3 3339.96  104.73
  11   3   3 3112.33   94.68
  -3 -11   3 3095.53   98.84
   3 -11   3 3119.26   97.73
 -11  -3   3 2945.14  103.30
  -3  11   4  250.56   34.00
  11  -3   4  197.43   30.06
  -3 -11   4  206.98   31.93
  11   3   4  241.32   30.83
 -11  -3   4  213.07   31.49
 -11   3   4  205.21   34.79
   3 -11   4  229.16   33.28
 -11   3  -4  205.49   26.83
   3  11   4  245.82   33.69
  -3 -11   5    4.50   13.59
  11  -3   5    2.88   12.80
  -3  11   5   30.18   20.88
 -11   3   5   -1.25   13.67
 -11   3  -5    3.58    8.14
   3  11   5   -2.53   10.30
 -11  -3   5   18.18   19.09
   3 -11   5   12.14   16.51
  11   3   5   27.96   19.27
  -3  11   6  141.56   38.99
 -11  -3   6  136.70   41.56
   3  11   6  120.23   35.78
 -11   3  -6  112.54   24.37
   3 -11   6  110.32   36.25
  11   3   6   88.66   35.59
 -11   3   6  111.92   38.06
  11  -3   6   74.70   29.07
  -3 -11   6  114.86   31.14
  -3  11   7  253.35   49.11
  -3 -11   7  337.47   57.50
  11   3   7  278.03   55.16
   3  11   7  318.22   55.41
 -11  -3   7  326.31   56.46
 -11   3   7  356.51   61.41
   3 -11   7  343.11   57.23
  11  -3   7  305.50   53.05
 -11   3   8  140.67   43.08
   3  11   8  119.17   41.15
 -11  -3   8  120.62   43.03
  11  -3   8  101.19   36.79
  -3  11   8   89.41   38.60
   3 -11   8   99.72   37.50
  -3 -11   8  117.20   40.13
  11   3   8  102.22   36.45
   3  11   9   68.81   41.21
 -11  -3   9   46.27   32.16
 -11   3   9   73.63   43.23
  11  -3   9   94.10   49.08
  -3 -11   9  117.85   37.17
  -3  11   9   50.04   33.47
   3 -11   9   91.86   42.26
  11   3   9   18.94   19.05
  11  -3  10   63.35   40.11
  -3 -11  10   53.54   35.13
   3  11  10   28.39   29.01
  -3  11  10    5.64   24.59
 -11   3  10   97.80   45.19
  11   3  10    8.69   32.22
   3 -11  10   66.75   39.24
 -11  -3  10   16.28   23.61
  -3  11  11   27.64   27.77
 -11   3  11   80.97   39.87
  11   3  11   28.60   27.10
 -11  -3  11   32.84   38.76
  -3 -11  11    3.68   25.69
   3  11  11   10.71   23.25
   3 -11  11   22.81   29.59
  -4  11   0   21.25   10.49
 -11  -4   0   12.24    7.31
 -11   4   0    3.46    9.51
   4  11   0   26.39   12.37
  11   4   0    7.61    5.18
  11   4   1   83.48   12.96
 -11   4  -1   83.30   18.09
   4  11   1   75.10   15.07
 -11   4   1   70.35   11.75
   4 -11   1   63.29   11.89
  -4  11   1   76.80   13.72
 -11  -4   1   70.79   16.28
  -4 -11   1   70.13   14.79
 -11  -4   1   83.78   14.03
  -4  11   2  110.38   17.45
 -11   4   2  110.31   18.75
  -4 -11   2  141.75   20.24
 -11  -4   2  140.46   19.02
  11  -4   2  128.41   14.04
 -11  -4   2  112.31   17.77
 -11   4  -2  116.88   18.68
   4  11   2  117.83   18.99
   4 -11   2  117.62   16.93
  11   4   2  109.98   15.44
 -11   4   3  114.67   26.08
  -4 -11   3  158.53   27.97
  11  -4   3  110.80   19.22
  11   4   3  109.80   22.74
 -11   4  -3  140.65   23.62
 -11  -4   3  126.26   25.47
 -11  -4   3  136.78   21.76
   4  11   3  145.63   26.17
   4 -11   3  101.57   23.10
  -4  11   3  183.89   34.36
   4  11   4   59.40   19.19
  -4  11   4   92.49   22.15
  -4 -11   4   71.13   18.17
 -11  -4   4  107.41   26.25
  11   4   4   73.84   18.95
 -11   4  -4   68.76   16.30
  11  -4   4   69.60   19.45
   4 -11   4   88.46   22.78
 -11   4   4   46.03   19.89
   4 -11   5   28.14   20.18
 -11   4  -5   11.48    8.68
 -11  -4   5   61.14   25.20
  -4 -11   5   30.65   19.81
  -4  11   5   24.50   19.04
 -11   4   5   25.04   24.33
   4  11   5    2.27   15.15
  11   4   5    5.45   12.20
  11  -4   5    8.21   12.64
 -11   4   6   74.49   37.03
   4 -11   6   37.21   25.51
  -4  11   6   66.48   33.97
 -11   4  -6   84.57   20.32
 -11  -4   6   72.44   34.02
  11   4   6   47.93   31.35
  11  -4   6   93.66   34.38
   4  11   6   60.52   27.53
  -4 -11   6   73.77   32.03
  11   4   7  107.84   38.14
 -11  -4   7  123.44   46.35
 -11   4   7   87.79   38.32
   4 -11   7   86.79   33.27
  11  -4   7   54.28   30.23
  -4  11   7  121.45   39.45
  -4 -11   7  164.61   42.88
   4  11   7  111.50   38.97
  11   4   8   -9.85   18.14
   4 -11   8  102.00   42.64
  11  -4   8   58.34   29.91
 -11   4   8   19.60   29.03
  -4  11   8   38.83   31.89
 -11  -4   8   91.32   42.06
   4  11   8   13.28   27.79
  -4 -11   8   -9.16   27.06
 -11   4   9   97.69   38.05
   4 -11   9   19.24   26.42
  11   4   9   14.13   19.64
 -11  -4   9  -16.22   24.04
  -4 -11   9   31.51   26.50
  11  -4   9   38.92   36.65
  -4  11   9   14.47   27.50
   4  11   9   59.00   35.90
  -4 -11  10   52.88   37.99
 -11   4  10   15.65   33.91
   4  11  10   48.73   43.99
  -4  11  10    9.49   26.08
  11  -4  10   57.64   38.13
  11   4  10   41.38   35.55
 -11  -4  10   41.10   30.31
   4 -11  10   87.24   51.54
  -4  11  11  115.51   45.35
  11   4  11   27.82   33.11
  -4 -11  11    5.72   23.72
   4  11  11  -21.98   37.96
   4 -11  11   13.46   27.32
 -11   4  11   88.57   41.03
 -11  -4  11   14.39   25.52
  11   5   0    7.71    4.05
 -11   5   0    9.55    6.08
   5  11   0    2.10    4.73
  -5  11   0    8.26    4.40
 -11  -5   1   70.15   12.50
 -11   5  -1   67.76   13.74
   5 -11   1   48.49   10.10
  -5 -11   1   65.15   13.73
 -11   5   1   53.89   10.14
  -5  11   1   63.20   12.40
   5  11   1   58.50   14.11
 -11  -5   1   68.92   15.33
  11   5   1   57.84   10.51
   5 -11   2  192.90   20.90
 -11  -5   2  194.86   23.13
 -11   5   2  190.70   24.56
  -5 -11   2  192.76   23.32
   5  11   2  188.26   24.47
  -5  11   2  190.79   23.89
  11   5   2  176.81   21.20
 -11   5  -2  201.47   25.20
 -11  -5   2  199.04   23.85
  11  -5   2  179.34   17.24
  -5 -11   3  915.38   35.26
  11   5   3  951.64   53.20
 -11  -5   3  900.86   46.59
  -5  11   3  986.98   57.82
 -11   5   3 1001.67   63.22
 -11   5  -3  884.47   51.61
   5 -11   3  973.18   54.00
 -11  -5   3  949.34   58.14
   5  11   3  967.60   56.89
  11  -5   3  924.66   51.59
  -5 -11   3 1052.91   58.37
 -11  -5   4   70.40   21.98
  -5  11   4   74.32   22.05
  -5 -11   4   75.74   22.33
  11  -5   4   72.44   21.21
  11   5   4   68.21   21.27
 -11   5  -4   59.34   15.09
 -11   5   4   65.63   22.37
   5 -11   4   51.64   17.60
   5  11   4   72.13   20.10
  11  -5   5   25.01   19.67
   5 -11   5   12.94   14.39
 -11  -5   5   39.24   21.05
 -11   5   5   15.89   16.00
 -11   5  -5   14.31    9.89
  11   5   5   25.35   12.96
   5  11   5   10.59   10.78
  -5 -11   5   25.51   17.02
  -5  11   5   17.27   13.73
  -5 -11   6   50.84   26.04
 -11   5   6   40.47   23.44
  -5  11   6   54.67   31.01
  11   5   6   25.18   20.01
   5 -11   6   78.74   29.78
   5  11   6   46.75   23.05
 -11  -5   6   49.85   25.58
  11  -5   6   35.68   24.68
  11   5   7  178.64   36.62
   5 -11   7  196.66   42.11
 -11  -5   7  221.32   51.41
 -11   5   7  168.39   44.12
  11  -5   7  172.88   40.27
   5  11   7  192.66   43.26
  -5  11   7  163.28   44.98
  -5 -11   7  172.14   44.50
   5  11   8   89.58   35.52
   5 -11   8   79.07   33.83
  11  -5   8  113.25   41.39
 -11   5   8  123.41   37.25
  -5 -11   8   92.44   37.24
  11   5   8  123.09   37.44
  -5  11   8   78.48   32.36
 -11  -5   8   85.10   36.47
  -5  11   9    0.55   24.76
  11  -5   9   21.94   24.85
 -11  -5   9   -7.72   25.92
 -11   5   9  -13.49   28.60
  11   5   9    9.12   25.73
  -5 -11   9   -5.10   28.43
   5 -11   9    4.46   19.96
   5  11   9   36.85   30.54
 -11  -5  10   36.03   36.23
  11  -5  10   -9.24   27.95
  11   5  10   52.28   38.68
  -5 -11  10   22.10   36.77
  -5  11  10   29.36   37.80
   5  11  10   12.97   29.36
   5 -11  10   91.82   50.42
 -11   5  10   48.53   33.37
   5  11  11   37.77   34.60
 -11   5  11   10.21   26.70
   5 -11  11  -20.42   28.88
  -5  11  11   27.81   31.28
  11   5  11  -15.92   25.51
  -5 -11  11   -1.20   22.94
 -11  -5  11  -21.68   23.75
   6  11   0   30.43    9.33
  11   6   0   28.14    8.16
  -6  11   0   20.83    5.89
 -11   6  -1   28.66   11.71
 -11  -6   1   29.48    9.52
  -6  11   1   30.35    8.86
  -6 -11   1   23.46    8.92
   6 -11   1   16.54    6.24
   6  11   1   25.14    9.58
 -11  -6   1   19.82    8.92
  11   6   1   30.04    8.68
 -11   6   1   29.24    7.46
 -11  -6   2  291.54   28.83
  11   6   2  251.61   25.53
  -6 -11   2  307.68   30.77
  11  -6   2  275.38   22.22
   6 -11   2  271.30   23.87
  -6  11   2  295.52   28.85
   6  11   2  262.28   27.84
 -11  -6   2  300.19   28.34
 -11   6   2  290.46   28.75
 -11   6  -2  257.59   28.63
 -11  -6   3  112.59   17.57
  -6 -11   3  195.21   30.57
   6  11   3  110.01   21.88
  -6 -11   3  119.29   14.17
   6 -11   3   96.98   17.80
 -11  -6   3  144.01   24.68
  -6  11   3  127.44   24.65
 -11   6   3  120.76   23.16
  11   6   3  117.55   20.19
 -11   6  -3  111.58   18.96
  11  -6   3  100.45   17.88
  -6 -11   4  222.43   35.90
   6  11   4  255.37   36.34
 -11  -6   4  203.61   34.31
  -6 -11   4  215.45   16.17
 -11   6  -4  240.28   28.25
  11   6   4  269.18   34.84
  11  -6   4  219.43   31.88
  -6  11   4  242.13   36.38
 -11   6   4  260.85   42.46
   6 -11   4  249.99   35.09
   6 -11   5   16.23   15.56
 -11  -6   5   30.45   21.15
  11   6   5   19.50   16.95
  -6 -11   5   12.56   14.46
   6  11   5   12.40   14.31
 -11   6   5   30.87   22.90
  11  -6   5   12.43   14.77
  -6  11   5    3.02   12.63
 -11   6  -5   15.21    8.92
   6  11   6   65.03   22.02
 -11  -6   6   41.84   19.35
  -6 -11   6   52.57   25.33
  11   6   6   22.03   20.72
   6 -11   6   47.70   22.59
  11  -6   6   39.78   22.36
  -6  11   6   38.22   20.42
 -11   6   6   21.07   20.76
 -11  -6   7   67.70   36.03
 -11   6   7   11.14   20.88
   6  11   7   61.90   27.59
  11  -6   7   49.64   31.57
  -6  11   7   57.73   26.65
  11   6   7   42.03   28.76
  -6 -11   7   43.02   27.22
   6 -11   7   25.25   20.45
 -11   6   8   33.08   26.25
  -6 -11   8    4.79   21.68
  -6  11   8  -20.43   21.15
 -11  -6   8   26.02   27.09
  11   6   8   22.58   24.13
  11  -6   8   28.47   25.87
   6  11   8   56.17   32.53
   6 -11   8  -20.32   25.70
  11  -6   9  -10.31   20.65
 -11   6   9  -34.69   31.30
   6 -11   9   -4.23   23.51
 -11  -6   9   22.55   22.89
  -6 -11   9  -50.44   34.01
  11   6   9  -15.26   30.36
   6  11   9  -16.97   21.06
  -6  11   9   22.87   20.56
 -11  -6  10   60.19   34.18
  -6  11  10    3.64   24.61
 -11   6  10   57.70   37.62
   6  11  10   59.86   34.99
  11  -6  10   -2.83   24.05
  11   6  10   15.90   23.87
   6 -11  10   72.25   45.33
  -6 -11  10   18.68   24.41
  -6 -11  11   31.68   35.74
 -11  -6  11  104.58   44.97
  -6  11  11   15.52   24.03
  11   6  11   11.27   23.60
 -11   6  11   10.30   29.85
   6  11  11   38.27   38.49
  11   7   0   24.35    8.73
 -11   7   0   15.95    2.83
  -7  11   0   12.34    4.78
   7  11   0    8.03    5.75
 -11   7   1  216.71   17.56
  -7  11   1  219.78   20.72
 -11  -7   1  241.10   25.23
   7  11   1  232.33   24.15
  11   7   1  231.97   22.02
  -7 -11   1  219.42   23.74
   7 -11   1  216.84   18.26
 -11  -7   1  230.96   22.24
  11  -7   1  225.74   12.27
 -11   7  -2  599.50   42.69
 -11  -7   2  626.94   42.60
  -7  11   2  668.45   42.95
  -7 -11   2  752.00   46.64
 -11  -7   2  722.62   44.77
  11  -7   2  576.53   33.19
   7 -11   2  646.99   36.96
   7  11   2  599.22   42.60
 -11   7   2  597.31   41.54
  11   7   2  573.39   38.74
   7 -11   3  298.29   32.16
 -11   7   3  296.14   35.09
  -7 -11   3  389.54   41.79
   7  11   3  298.92   32.49
 -11   7  -3  263.55   28.94
  -7 -11   3  332.48   24.96
  11   7   3  297.88   30.88
 -11  -7   3  293.45   27.23
  -7  11   3  262.05   32.10
  11  -7   3  306.89   32.02
 -11  -7   3  321.52   35.90
  -7 -11   4  115.22   27.73
 -11   7   4  148.49   34.01
 -11  -7   4  141.57   29.51
  -7  11   4  146.84   30.45
  11  -7   4  108.30   23.39
   7  11   4  104.53   26.52
  -7 -11   4   81.57   11.59
  11   7   4  139.37   26.26
   7 -11   4   94.01   23.56
 -11   7  -4  113.67   19.68
  11   7   5   31.65   16.84
  -7 -11   5   -0.84   11.44
   7  11   5   -1.83   12.29
 -11   7   5  -11.95   20.78
   7 -11   5  -12.70   11.70
  11  -7   5   27.78   19.48
 -11   7  -5    9.15    6.97
 -11  -7   5   16.86   12.66
  -7  11   5   -5.08   12.74
  11   7   6   62.37   26.37
  -7  11   6   67.65   31.00
  11  -7   6   87.72   29.79
   7  11   6   67.19   27.59
 -11   7   6   81.76   28.97
  -7 -11   6   81.23   27.19
   7 -11   6   66.39   28.68
 -11  -7   6   82.07   31.25
 -11  -7   7  118.61   41.10
   7 -11   7  106.37   33.26
  11   7   7  137.87   39.61
  11  -7   7   93.77   31.48
 -11   7   7   84.72   36.40
   7  11   7   63.16   29.32
  -7 -11   7  109.03   38.81
  -7  11   7  106.73   37.97
   7  11   8  109.97   35.38
 -11  -7   8   67.89   34.58
  11   7   8  107.96   38.52
  11  -7   8   64.11   28.02
  -7 -11   8  108.17   41.93
 -11   7   8  137.35   42.27
  -7  11   8   71.38   34.64
   7 -11   8   67.62   34.82
 -11  -7   9   24.77   27.06
  11   7   9  -13.86   27.48
   7 -11   9   14.49   18.45
  -7  11   9    5.92   19.17
   7  11   9   61.50   37.05
  -7 -11   9   23.14   22.30
 -11   7   9   -9.51   27.50
  11  -7   9   14.15   21.71
  11  -7  10   22.11   31.47
   7 -11  10   34.79   38.39
  11   7  10    5.27   21.15
 -11  -7  10   38.82   34.29
   7  11  10   33.63   34.21
  -7  11  10   75.51   37.21
  -7 -11  10   32.30   29.46
 -11   7  10   47.48   41.83
 -11  -7  11   43.49   39.26
   7  11  11   53.69   45.72
  11   7  11   22.41   30.15
 -11   7  11    2.45   24.75
  -7  11  11   -2.82   30.73
  -7 -11  11   19.29   26.80
  11   8   0   32.43   11.13
  -8  11   0   17.65    6.93
   8  11   0   38.94   13.55
 -11   8   0   39.11    7.65
  11  -8   1   92.72    8.34
   8  11   1   96.48   16.20
  -8 -11   1  102.83   16.68
   8 -11   1   83.88   12.34
  11   8   1   96.72   15.53
  -8  11   1   97.37   13.98
 -11  -8   1   98.74   15.32
 -11   8   1   92.45   12.16
  11   8   2   97.34   18.50
   8 -11   2  101.66   15.72
  -8  11   2  141.01   23.48
  11  -8   2  100.56   14.99
   8  11   2  112.02   20.98
 -11   8   2  102.27   16.76
 -11  -8   2   89.50   18.06
 -11  -8   2  108.54   19.58
   8  11   3   44.43   15.80
   8 -11   3   35.56   13.18
 -11   8   3   36.11   16.93
  -8  11   3   50.02   21.16
  11  -8   3   40.41   13.90
 -11   8  -3   34.17   12.84
 -11  -8   3   40.83   16.69
  11   8   3   48.63   15.88
  -8 -11   3   60.89   13.99
 -11  -8   3   37.63   12.65
  -8 -11   4   55.48   19.70
 -11   8   4   52.88   20.10
  -8  11   4   36.39   14.53
 -11  -8   4   40.70   11.82
 -11  -8   4   75.68   21.20
  11  -8   4   53.81   18.48
  11   8   4   46.56   14.38
   8  11   4   62.89   20.46
   8 -11   4   43.34   16.67
  -8 -11   4   35.57    8.32
 -11   8  -4   61.81   14.91
  -8  11   5   14.98   12.33
 -11   8   5    2.18   19.37
 -11  -8   5   28.60   18.08
  -8 -11   5   16.18   14.07
  11  -8   5   14.45   15.06
 -11   8  -5    9.49    6.62
   8  11   5    7.53   14.94
  11   8   5   -7.51    9.90
   8 -11   5   15.21   13.85
 -11   8   6  104.60   36.88
   8 -11   6  108.68   36.32
  -8  11   6   69.66   29.75
  -8 -11   6  106.97   35.07
 -11  -8   6   92.31   35.46
  11  -8   6  100.95   31.57
  11   8   6   74.40   32.97
   8  11   6   57.08   30.35
  -8  11   7  119.64   45.06
  -8 -11   7  100.41   35.30
   8 -11   7   94.54   37.08
  11  -8   7  121.36   34.50
  11   8   7   65.44   33.98
 -11  -8   7  111.03   39.26
   8  11   7  122.99   36.75
 -11   8   7  112.05   44.82
   8  11   8   48.51   26.47
   8 -11   8   23.44   21.96
 -11  -8   8   37.03   28.87
  11   8   8   22.32   26.30
  -8  11   8   52.43   30.38
  -8 -11   8   51.34   28.68
  11  -8   8   81.37   30.43
 -11   8   8   69.36   35.19
  11   8   9  -33.71   22.92
 -11   8   9   16.84   24.52
 -11  -8   9   58.81   33.36
  11  -8   9   66.70   34.80
  -8 -11   9   -2.52   20.02
  -8  11   9   29.26   24.94
   8 -11   9    8.89   22.17
   8  11   9   75.31   37.41
 -11  -8  10    0.07   21.97
  11  -8  10   70.67   42.32
  -8 -11  10   71.83   45.28
 -11   8  10   16.67   32.09
   8  11  10   -9.00   26.67
   8 -11  10   61.39   43.29
  -8  11  10   45.06   33.84
  11   8  10    5.84   29.21
 -11  -8  11   23.20   33.72
 -11   8  11  -20.52   30.86
  11   8  11    0.66   25.01
  -8 -11  11   40.92   37.91
   8  11  11  -14.42   25.35
  -8  11  11   15.21   33.10
   9  11   0  -12.37    9.45
 -11   9   0   -2.35    3.94
  -9  11   0   -4.70    4.82
  11   9   0   -4.90    4.94
  11  -9   1   16.72    4.46
 -11   9   1   24.14    7.15
   9  11   1    6.81    5.77
  -9 -11   1   22.26    9.45
 -11  -9   1   24.35   10.15
  -9  11   1   19.11    7.12
  11   9   1   13.58    7.05
   9 -11   1   18.13    4.93
  11  -9   2  776.37   38.23
 -11  -9   2  844.02   51.69
  -9  11   2  825.92   46.82
   9  11   2  812.92   49.99
   9 -11   2  804.95   40.17
  11   9   2  739.38   45.53
  -9 -11   2  890.89   50.18
 -11   9   2  806.92   44.96
 -11  -9   2  833.49   48.19
  -9 -11   3 1831.48   81.59
 -11   9   3 1666.81   79.35
 -11  -9   3 1586.09   63.12
   9  11   3 1652.09   75.68
  -9  11   3 1680.25   78.69
  11   9   3 1642.42   74.09
  -9 -11   3 1663.41   61.72
   9 -11   3 1660.36   71.72
  11  -9   3 1643.86   72.36
 -11  -9   3 1798.02   80.68
  -9 -11   4   37.31   16.73
 -11  -9   4   11.14    8.48
  -9 -11   4   11.74    5.91
 -11  -9   4   48.70   21.63
   9 -11   4   35.46   14.32
  11  -9   4   28.25   14.87
   9  11   4   24.99   15.59
  -9  11   4   13.28   11.31
  11   9   4   21.00   11.76
 -11   9   4   35.01   17.70
 -11  -9   5   14.97   15.19
  11   9   5   15.61   14.42
 -11   9   5   -3.43   12.05
  -9 -11   5   13.35   13.92
   9  11   5   18.49   17.48
  11  -9   5   29.08   19.19
  -9  11   5   -9.13   15.65
   9 -11   5   11.66   17.83
 -11   9   6   55.45   31.58
  -9  11   6   67.70   33.33
   9  11   6   88.30   35.29
  11   9   6   84.08   33.02
  -9 -11   6  104.08   36.45
   9 -11   6  124.52   37.06
  11  -9   6   73.45   26.61
 -11  -9   6   86.99   32.51
  11  -9   7  186.51   48.65
 -11   9   7   97.24   37.73
   9  11   7  126.12   39.66
 -11  -9   7  128.94   42.78
  11   9   7  141.37   44.30
  -9 -11   7  133.56   35.67
   9 -11   7  155.96   43.87
  -9  11   7  187.80   47.22
 -11   9   8   52.80   25.23
  -9  11   8   31.19   26.50
  -9 -11   8   74.07   28.42
 -11  -9   8   77.47   35.71
   9  11   8   30.28   26.12
  11   9   8   36.74   23.55
  11  -9   8   57.53   29.89
   9 -11   8   67.31   34.68
  11  -9   9  103.83   43.68
  -9 -11   9  107.07   41.24
  -9  11   9   89.20   46.03
   9  11   9   94.44   46.57
   9 -11   9   64.99   34.87
  11   9   9   80.66   42.37
 -11   9   9   79.03   44.74
 -11  -9   9  129.83   48.75
   9 -11  10  -31.31   29.19
  11   9  10   32.01   38.03
   9  11  10    6.39   24.19
  -9 -11  10   34.31   31.69
  -9  11  10   -0.35   29.05
  11  -9  10   55.21   41.69
 -11   9  10   82.34   38.76
 -11  -9  10  -26.82   30.67
  -9 -11  11   16.80   32.68
   9  11  11  -21.62   38.86
  11   9  11   63.15   44.05
  -9  11  11   22.93   29.44
 -11   9  11   54.56   31.20
 -11  -9  11   41.34   29.35
  11  10   0   -1.47    9.47
 -10  11   0   14.17    7.24
 -11  10   0   37.43   10.54
  10  11   0   22.51   15.39
 -10  11   1   75.69   11.84
 -11  10   1   88.53   12.86
  11  10   1   86.76   15.83
  10  11   1   80.31   16.19
 -10 -11   1   73.31   16.45
 -11 -10   1   92.71   16.42
  10 -11   1   74.69    9.79
  11 -10   1   73.16    8.57
 -11 -10   2   39.02   11.85
 -11  10   2   38.70   10.99
  10 -11   2   39.33   10.11
 -11 -10   2   67.99   21.62
 -10 -11   2   36.81   13.48
  11 -10   2   36.26    9.33
 -10  11   2   53.92   17.96
  10  11   2   42.95   13.59
  11  10   2   59.30   16.14
 -11 -10   3  264.94   27.96
  10 -11   3  189.69   27.10
 -10 -11   3  350.11   43.54
 -10 -11   3  294.67   31.21
  11  10   3  209.68   30.16
 -11 -10   3  244.93   31.69
 -11  10   3  207.51   31.77
 -10  11   3  303.08   44.36
  10  11   3  209.38   30.52
  11 -10   3  205.63   27.23
  11  10   4   59.98   17.54
  11 -10   4   58.87   17.49
 -11 -10   4   52.87   12.54
  10  11   4   59.16   19.56
  10 -11   4   47.65   18.35
 -10 -11   4   55.19   11.77
 -11  10   4   86.96   25.91
 -10  11   4   60.88   20.80
 -11 -10   4   72.58   25.25
 -10 -11   4   57.62   19.40
  11  10   5   12.39   13.75
  10 -11   5   13.56   14.56
 -11 -10   5   56.00   24.18
  11 -10   5   12.84   15.83
  10  11   5   42.45   19.60
 -10  11   5  -15.99   16.60
 -11  10   5   27.07   22.54
 -10 -11   5  -12.92   11.46
 -11  10   6  179.68   49.50
 -11 -10   6  205.41   50.76
  10  11   6  198.10   45.59
  11  10   6  207.45   48.25
  10 -11   6  198.11   50.18
 -10  11   6  140.69   39.08
 -10 -11   6  272.46   51.27
  11 -10   6  172.63   39.99
 -10 -11   7  110.12   42.38
  10  11   7  113.61   38.22
 -11 -10   7  167.26   46.83
  11  10   7  129.97   36.00
  10 -11   7  147.60   39.99
 -11  10   7   89.06   39.26
 -10  11   7  104.99   37.57
  11 -10   7  142.21   42.82
 -11 -10   8   34.90   27.18
  11 -10   8   -8.33   20.45
 -10 -11   8   -1.59   21.61
  10 -11   8   -3.83   16.71
 -11  10   8   30.29   26.01
  11  10   8   36.82   31.49
 -10  11   8  -17.85   20.28
  10  11   8   64.00   29.31
 -11 -10   9  133.67   45.50
  10  11   9  112.99   42.20
  11 -10   9  168.25   53.06
  10 -11   9  203.13   56.50
  11  10   9  146.77   47.82
 -11  10   9  165.38   53.82
 -10 -11   9  146.09   51.10
 -10  11   9  214.99   58.46
 -10  11  10  -14.48   25.90
  10 -11  10   11.40   26.35
 -11 -10  10   -5.71   26.75
  11  10  10    3.87   25.71
  11 -10  10   48.99   36.02
 -11  10  10  -14.15   21.16
 -10 -11  10   27.06   26.49
  10  11  10   13.11   24.50
  10  11  11  -34.33   33.98
 -11 -10  11   -0.76   26.84
 -10 -11  11  -21.82   33.40
 -11  10  11    0.77   26.48
  11  10  11   40.38   35.99
 -10  11  11   46.90   33.84
  11  11   0  -22.91   13.64
 -11  11   0  -17.12    6.67
  11  11   1  154.39   21.45
 -11  11   1  165.93   17.40
  11 -11   1  164.35   14.00
 -11 -11   1  191.79   24.40
 -11  11   2 1662.94   65.64
 -11 -11   2 1630.38   71.41
  11  11   2 1551.66   69.87
  11 -11   2 1668.51   57.02
  11  11   3 3300.87  107.93
 -11 -11   3 3241.53   94.09
  11 -11   3 3352.31  103.11
 -11 -11   3 3418.73  114.22
 -11  11   3 3440.26  113.49
 -11 -11   4   56.06   13.35
  11 -11   4   67.19   18.96
  11  11   4  123.91   25.36
 -11  11   4  113.06   27.33
 -11 -11   4  100.40   25.37
  11  11   5    3.14   14.44
 -11 -11   5   22.79   16.81
 -11  11   5   17.18   20.07
  11 -11   5   16.98   12.67
  11 -11   6  179.90   41.68
 -11  11   6  135.53   44.47
 -11 -11   6  162.11   44.53
  11  11   6  194.20   42.20
  11 -11   7  179.11   42.49
 -11 -11   7  153.20   43.97
 -11  11   7  110.73   38.05
  11  11   7  133.80   38.47
 -11  11   8   40.40   26.42
  11  11   8   49.74   31.42
 -11 -11   8  -16.26   20.79
  11 -11   8   28.52   23.80
 -11 -11   9  190.84   57.64
 -11  11   9  229.99   63.96
  11  11   9  155.16   50.36
  11 -11   9  286.47   63.05
  11  11  10  -30.31   34.48
  11 -11  10   56.20   34.64
 -11 -11  10   11.86   29.24
 -11  11  10   30.04   30.06
 -11 -11  11    2.22   29.87
 -11  11  11  -28.94   32.45
  11  11  11    8.65   32.03
 -12   0   0 5238.36  119.28
   0  12   0 5017.96  103.34
 -12   0  -1 2440.21   81.38
   0 -12   1 2211.52   68.87
  12   0   1 2487.95   47.12
   0  12   1 2421.02   75.60
 -12   0   1 2468.67   82.19
 -12   0   1 2431.97   63.86
   0 -12   2  102.99   16.54
 -12   0   2   95.64   16.70
 -12   0  -2   83.63   15.96
   0  12   2  112.01   18.12
 -12   0   2   99.29   17.48
  12   0   2  103.79   13.65
 -12   0   3  280.70   37.33
 -12   0  -3  332.20   34.62
  12   0   3  291.29   30.62
   0 -12   3  316.39   33.76
   0  12   4  514.54   49.55
   0 -12   4  478.94   46.54
  12   0   4  489.46   43.56
 -12   0   4  488.27   54.24
  12   0   5  261.20   37.68
   0  12   5  246.68   39.99
 -12   0   5  256.95   41.29
   0 -12   5  271.81   37.75
   0 -12   6 1021.74   88.66
  12   0   6 1087.90   84.55
 -12   0   6 1060.72   92.63
   0  12   6  993.50   87.03
 -12   0   7  182.29   47.37
   0  12   7  196.85   50.32
   0 -12   7  185.56   49.48
  12   0   7  151.11   40.04
 -12   0  -7   79.34   27.94
   0 -12   8   18.90   30.02
 -12   0   8   42.12   29.20
  12   0   8   47.40   23.10
   0  12   8   10.82   22.74
   0 -12   9  164.59   54.09
  12   0   9  176.07   53.01
 -12   0   9  151.19   60.35
   0  12   9  226.83   57.33
 -12   0  10  179.04   56.45
   0 -12  10  164.73   54.58
  12   0  10  117.38   44.99
   0  12  10   42.44   41.24
 -12   0  11    7.98   27.92
   0 -12  11   28.17   40.15
   0  12  11    4.16   29.59
 -12  -1   0    3.07    3.55
 -12   1   0    0.30    8.20
  -1  12   0   28.92   18.86
 -12   1   0    6.54    4.08
 -12  -1   0   15.42    9.69
   1  12   0   39.39   21.75
  12  -1   1 1209.08   29.85
  12   1   1 1217.44   36.43
  -1  12   1 1214.78   53.67
 -12   1  -1 1353.39   62.79
  -1 -12   1 1336.04   54.35
   1  12   1 1216.31   54.45
 -12  -1   1 1299.73   59.64
 -12  -1  -1 1244.89   58.57
 -12  -1   1 1202.82   44.03
 -12   1   1 1274.59   60.46
   1 -12   1 1273.02   51.93
 -12   1   1 1205.29   45.34
 -12   1  -2  266.69   27.76
  -1 -12   2  257.21   26.10
   1  12   2  218.12   25.44
  12  -1   2  293.96   21.54
   1 -12   2  241.96   23.96
  -1  12   2  286.93   27.53
 -12   1   2  265.28   29.39
 -12  -1   2  301.03   30.78
  12   1   2  282.53   22.32
 -12  -1   2  261.13   27.99
 -12  -1  -2  228.87   25.49
 -12  -1   3  784.81   61.36
  12  -1   3  678.30   41.89
 -12   1  -3  796.38   52.19
  -1 -12   3  695.78   46.86
 -12   1   3  885.17   68.23
  12   1   3  668.11   42.23
   1 -12   3  662.58   46.31
 -12   1  -4  177.85   28.27
 -12   1   4  198.52   36.59
  -1 -12   4  181.94   31.58
   1 -12   4  177.29   30.30
 -12  -1   4  219.73   38.74
  -1  12   4  201.68   35.48
   1  12   4  214.51   33.15
  12   1   4  207.61   30.21
  12  -1   4  208.72   29.85
 -12   1  -5   19.67   12.60
  12  -1   5   23.01   10.87
   1 -12   5   28.73   20.55
  -1  12   5   54.50   26.90
  12   1   5   20.39   16.62
  -1 -12   5   59.67   23.61
 -12  -1   5   33.52   18.93
 -12   1   5   43.05   22.43
   1  12   5   39.70   22.92
  -1  12   6  278.61   55.27
  -1 -12   6  332.50   56.13
   1  12   6  347.54   61.38
  12   1   6  294.59   49.10
 -12   1  -6  411.09   49.16
  12  -1   6  318.95   51.60
   1 -12   6  383.88   61.68
 -12   1   6  309.80   61.24
 -12  -1   6  327.09   60.79
 -12   1   7  172.66   49.98
  12   1   7  140.53   39.71
  12  -1   7  213.82   48.38
   1  12   7  182.64   51.38
  -1  12   7  207.87   48.23
  -1 -12   7  216.21   56.14
   1 -12   7  214.06   47.84
 -12  -1   7  236.17   53.84
   1  12   8   42.77   28.57
  12   1   8   -2.60   15.89
 -12  -1   8   53.34   35.55
 -12   1   8   51.18   37.09
  -1  12   8   32.20   34.97
   1 -12   8   57.50   29.90
  -1 -12   8   62.19   37.72
  12  -1   8   20.28   18.37
  -1 -12   9  118.49   45.50
 -12  -1   9  138.81   49.12
   1 -12   9  162.04   53.70
 -12   1   9  166.80   52.53
  12   1   9  140.29   45.41
   1  12   9   90.29   46.51
  -1  12   9  106.78   47.00
  12  -1   9   99.78   47.41
   1  12  10   73.55   45.23
  12   1  10   33.23   31.53
  -1  12  10   44.31   26.54
 -12   1  10   79.13   44.16
  -1 -12  10  115.83   49.98
  12  -1  10  104.62   45.68
 -12  -1  10   43.27   41.03
   1 -12  10   58.81   46.63
  -1 -12  11    9.81   27.28
  -1  12  11   14.14   26.23
 -12   1  11   72.74   35.18
   1  12  11   27.51   25.69
 -12  -1  11   88.03   43.19
   1 -12  11   68.07   42.21
 -12  -2   0 2209.22   76.47
 -12   2   0 2150.92   38.38
 -12   2   0 2184.08   79.47
  -2  12   0 2100.55   65.29
 -12  -2   0 2077.70   50.22
   2  12   0 2131.24   68.75
 -12  -2   1 1468.66   63.21
 -12   2   1 1509.07   66.58
   2 -12   1 1406.47   54.08
  12   2   1 1503.98   43.48
 -12   2  -1 1118.61   58.03
   2  12   1 1235.24   57.15
 -12  -2   1 1383.62   49.39
  -2 -12   1 1462.18   58.22
 -12  -2  -1 1367.03   61.19
  -2  12   1 1527.34   59.57
  12  -2   1 1429.98   27.85
 -12   2   1 1417.18   51.21
  12   2   2   48.07    9.84
  -2  12   2   52.01   13.00
 -12   2  -2   47.99   14.04
 -12  -2   2   39.78   12.94
   2  12   2   53.30   12.93
 -12  -2   2   46.30   11.61
  12  -2   2   46.54    8.75
 -12   2   2   41.23   12.28
   2 -12   2   35.19   10.95
  -2 -12   2   34.90    9.76
   2 -12   3  265.17   29.46
  12   2   3  281.29   29.92
  -2 -12   3  264.61   30.67
 -12   2   3  261.06   36.49
 -12  -2   3  254.02   34.09
 -12   2  -3  286.39   32.07
  12  -2   3  255.27   27.19
  -2 -12   4  326.25   39.18
 -12   2  -4  459.39   41.92
  12   2   4  404.91   39.68
   2 -12   4  376.93   42.21
  12  -2   4  391.81   38.98
  -2  12   4  364.00   42.22
 -12  -2   4  402.71   47.03
 -12   2   4  390.26   46.95
   2  12   4  423.11   42.84
  -2 -12   5  367.58   45.00
  -2  12   5  356.35   47.04
  12  -2   5  336.96   43.45
  12   2   5  367.89   44.86
 -12  -2   5  383.51   49.14
 -12   2   5  414.92   53.40
   2  12   5  377.59   46.18
 -12   2  -5  395.86   41.74
   2 -12   5  378.69   47.33
 -12  -2   6  880.11   83.37
   2 -12   6  962.90   84.55
  12  -2   6  872.91   76.15
  -2 -12   6  941.54   79.63
  12   2   6  878.44   77.01
 -12   2  -6  733.55   62.11
  -2  12   6  803.28   77.37
   2  12   6  848.35   78.03
 -12   2   6  848.86   82.92
 -12  -2   7  101.68   42.49
  12  -2   7   86.70   36.91
  -2  12   7  115.13   40.52
  -2 -12   7  168.88   44.60
  12   2   7   97.89   36.82
   2 -12   7   87.06   34.08
 -12   2   7   96.18   40.95
   2  12   7  130.05   41.14
   2 -12   8   36.72   28.90
 -12  -2   8   56.27   26.80
  -2 -12   8   91.50   36.06
  -2  12   8   66.39   34.37
  12   2   8   23.37   20.47
   2  12   8   57.32   28.96
 -12   2   8   67.57   35.39
  12  -2   8   32.11   25.37
  -2  12   9   99.51   43.80
   2 -12   9  124.64   52.52
  -2 -12   9   87.26   43.92
 -12   2   9  160.19   50.70
  12   2   9   92.34   43.31
  12  -2   9  152.40   51.91
 -12  -2   9  102.18   41.62
   2  12   9  122.13   43.63
  -2  12  10  120.15   50.30
   2  12  10  182.07   58.79
   2 -12  10  104.62   46.05
  12   2  10   52.72   36.14
  12  -2  10  152.36   54.10
 -12  -2  10  123.54   41.92
  -2 -12  10  126.68   53.79
 -12   2  10  113.10   45.56
  -2  12  11   71.61   40.85
  -2 -12  11   14.56   29.63
   2 -12  11   12.75   29.68
 -12  -2  11   67.75   36.69
   2  12  11    3.20   32.07
 -12   2  11   50.00   37.61
  -3  12   0   40.27   14.48
 -12  -3   0   28.57    7.39
   3  12   0   54.55   17.69
 -12  -3   0   18.82    6.84
 -12   3   0   26.95   10.72
 -12  -3   1  569.34   40.09
  -3 -12   1  548.56   36.76
 -12  -3   1  532.74   31.68
 -12   3   1  560.88   43.17
   3  12   1  507.08   37.16
   3 -12   1  515.87   33.20
  12   3   1  526.85   28.05
 -12   3  -1  540.99   40.74
  -3  12   1  530.06   35.02
 -12   3   1  492.45   31.35
 -12   3  -2  245.85   29.09
 -12  -3   2  265.55   26.79
  12  -3   2  246.49   18.38
 -12  -3   2  226.46   25.42
   3  12   2  234.54   25.74
  -3 -12   2  206.31   22.90
   3 -12   2  220.44   23.08
  12   3   2  237.59   21.76
  -3  12   2  243.09   26.11
 -12   3   2  241.59   29.26
  12   3   3  516.05   39.29
 -12   3   3  550.34   53.55
   3 -12   3  560.50   41.59
 -12   3  -3  644.66   48.10
  -3  12   3  495.45   41.04
 -12  -3   3  573.26   49.37
  -3 -12   3  536.28   41.70
 -12  -3   3  583.73   42.06
  12  -3   3  500.38   36.04
   3  12   3  536.91   45.19
 -12  -3   4   57.07   18.65
 -12   3  -4   52.57   15.93
   3 -12   4   60.74   19.64
  -3  12   4   52.66   20.81
  12   3   4   54.37   15.51
 -12   3   4   56.86   22.20
  -3 -12   4   59.46   18.92
   3  12   4   76.53   21.76
  12  -3   4   74.91   17.97
  -3 -12   5   14.65   13.54
 -12   3   5   21.48   15.95
   3  12   5   38.83   19.74
  12   3   5   30.55   20.11
   3 -12   5    9.34   17.17
  -3  12   5   31.73   16.55
  12  -3   5   19.71   12.44
 -12  -3   5   20.21   15.30
 -12   3  -5    7.09   10.21
  -3  12   6  255.83   51.21
  12  -3   6  247.08   46.11
 -12   3   6  225.65   50.74
 -12   3  -6  281.10   37.29
 -12  -3   6  254.97   51.78
  -3 -12   6  246.97   48.23
   3 -12   6  292.45   50.36
   3  12   6  283.59   48.58
  12   3   6  258.82   44.54
   3 -12   7  159.11   50.91
  12   3   7  190.60   42.73
   3  12   7  163.62   42.63
 -12   3   7  149.76   48.01
  12  -3   7  121.40   35.46
  -3  12   7  174.25   48.83
 -12  -3   7  154.07   48.08
  -3 -12   7  166.63   45.59
  12  -3   8   35.03   28.53
 -12   3   8   23.38   24.99
  -3 -12   8   14.40   25.58
   3  12   8   11.43   28.46
 -12  -3   8   31.22   30.43
  -3  12   8   17.78   24.26
  12   3   8    1.50   15.70
   3 -12   8   11.39   25.46
 -12   3   9   90.88   42.44
  -3  12   9   39.87   31.57
  12   3   9   56.15   35.07
   3 -12   9   60.52   38.15
   3  12   9   91.10   40.79
  12  -3   9   97.46   41.09
  -3 -12   9   51.66   27.97
 -12  -3   9   49.09   38.61
   3  12  10   99.88   45.15
  -3 -12  10   29.61   36.16
   3 -12  10    5.72   41.50
 -12  -3  10   38.16   33.18
  12   3  10   75.53   45.60
  12  -3  10   55.12   40.15
 -12   3  10   52.80   41.22
  -3  12  10   17.63   36.17
   3 -12  11   66.48   39.06
  -3  12  11  -18.21   25.87
  -3 -12  11    2.83   30.82
 -12   3  11   89.98   43.11
 -12  -3  11   35.25   34.00
   3  12  11    0.08   27.61
 -12  -4   0 2039.55   58.62
 -12  -4   0 2070.64   74.38
 -12   4   0 2228.64   83.05
  -4  12   0 2015.67   61.99
   4  12   0 2065.64   68.64
   4 -12   1  473.90   30.32
 -12   4  -1  494.66   38.82
 -12   4   1  500.00   30.22
 -12  -4   1  487.34   30.37
  -4  12   1  513.44   33.59
   4  12   1  530.49   37.10
 -12  -4   1  489.61   37.16
  -4 -12   1  511.82   35.96
  12   4   1  505.43   28.92
  -4 -12   2   46.27   11.70
 -12   4  -2   52.55   14.94
  12  -4   2   55.40    8.80
 -12  -4   2   61.21   15.10
   4 -12   2   46.13   11.35
  12   4   2   58.79   11.82
 -12   4   2   59.23   15.13
  -4  12   2   58.47   14.88
   4  12   2   57.89   13.57
 -12  -4   2   63.34   12.94
 -12   4   3  131.69   28.63
 -12   4  -3  152.08   23.37
 -12  -4   3  137.65   22.08
  -4 -12   3  144.30   24.03
  12   4   3  123.34   20.59
   4  12   3  121.28   22.28
  12  -4   3  111.93   18.19
  -4  12   3  148.25   25.55
 -12  -4   3  143.60   25.42
   4 -12   3  145.72   24.10
 -12   4  -4   29.59    8.06
  12  -4   4   38.36   14.40
 -12   4   4   44.44   18.24
  -4 -12   4   32.33   14.65
   4 -12   4   42.32   16.11
   4  12   4   51.86   17.64
 -12  -4   4   57.94   19.35
  12   4   4   45.83   14.56
  -4  12   4   19.64   12.87
  12  -4   5   86.57   25.18
 -12   4   5  134.02   29.06
   4 -12   5  100.08   24.20
  -4 -12   5  117.68   26.15
  -4  12   5   83.38   21.49
  12   4   5  109.05   26.10
 -12  -4   5   91.20   23.40
   4  12   5  117.59   27.07
 -12   4  -5  101.62   20.42
  12  -4   6  402.46   55.15
   4 -12   6  416.84   54.92
   4  12   6  428.46   54.18
  -4 -12   6  391.31   51.71
 -12  -4   6  346.49   53.94
  12   4   6  385.94   53.37
 -12   4   6  310.03   55.14
 -12   4  -6  311.74   36.55
  -4  12   6  380.70   54.90
  12   4   7   54.26   29.57
   4  12   7   67.15   33.23
   4 -12   7   87.15   31.62
 -12  -4   7   93.68   33.61
 -12   4   7   94.25   38.15
  -4  12   7   77.22   36.44
  12  -4   7   50.23   27.81
  -4 -12   7   41.04   30.61
  12   4   8   -3.20   16.14
   4 -12   8   50.15   34.88
  12  -4   8   32.86   24.32
 -12  -4   8    7.80   22.18
 -12   4   8   21.46   23.11
  -4  12   8    7.33   19.70
   4  12   8   38.47   24.35
  -4 -12   8  -21.55   23.21
  12  -4   9   40.54   32.19
 -12   4   9   59.09   35.35
  -4 -12   9   26.11   29.07
 -12  -4   9   12.52   19.30
   4 -12   9   29.21   26.19
  12   4   9   92.21   37.06
  -4  12   9   57.19   38.50
   4  12   9    6.93   19.49
   4 -12  10   56.57   36.97
   4  12  10   59.81   33.26
 -12  -4  10   63.15   37.74
  -4  12  10   45.46   36.54
  -4 -12  10   57.80   37.36
 -12   4  10   50.14   35.77
  12  -4  10   29.48   33.28
  12   4  10   45.53   32.98
   4 -12  11    8.85   27.45
   4  12  11   45.09   38.79
 -12   4  11   34.39   32.14
  -4  12  11   78.39   39.96
 -12  -4  11   29.51   31.55
  -4 -12  11    0.08   27.66
 -12   5   0   15.34    7.77
  12   5   0   14.88    6.21
   5  12   0   23.54   11.97
  -5  12   0   22.19   11.14
 -12  -5   1   90.85   16.11
 -12  -5   1   66.68   12.32
   5  12   1   77.36   16.24
 -12   5   1   68.83   10.90
  -5 -12   1   69.03   13.67
  -5  12   1   73.95   13.24
 -12   5  -1   64.15   15.67
   5 -12   1   58.93   11.28
  12   5   1   79.43   13.19
 -12   5   2   49.99   13.56
 -12   5  -2   46.29   13.04
 -12  -5   2   77.39   15.91
  12   5   2   37.58   10.25
  -5  12   2   57.73   14.23
  -5 -12   2   51.76   12.45
   5  12   2   44.69   10.80
   5 -12   2   53.85   11.29
 -12  -5   2   53.19   13.90
  12  -5   2   51.42    8.97
 -12  -5   3  312.23   36.68
  12   5   3  251.65   29.05
 -12   5   3  261.74   36.61
   5  12   3  261.84   30.62
 -12   5  -3  283.02   31.58
  -5  12   3  273.62   31.58
  -5 -12   3  310.70   32.58
   5 -12   3  271.05   29.56
  12  -5   3  265.99   27.33
 -12  -5   3  274.06   28.76
   5 -12   4   -9.40   11.09
  12  -5   4   11.61    9.57
 -12  -5   4    7.32   14.52
 -12   5   4   20.90   18.14
  -5 -12   4   -7.01   12.70
   5  12   4    7.94   11.33
  -5 -12   4   -4.76    3.50
  -5  12   4   -2.38    9.45
 -12   5  -4   10.46    9.46
  12   5   4    5.81   11.99
 -12   5   5   17.11   13.74
 -12   5  -5   21.70   11.75
  -5 -12   5    7.43   14.81
  -5  12   5    0.57   11.46
  12  -5   5   21.66   13.15
 -12  -5   5   35.60   19.19
   5  12   5   33.08   22.18
   5 -12   5   40.64   18.10
  12   5   5   25.79   14.03
   5  12   6   74.39   28.84
 -12   5  -6   43.17   13.98
  -5  12   6   44.34   26.33
  12  -5   6   70.16   29.92
   5 -12   6   83.11   30.16
 -12   5   6   55.29   27.39
  12   5   6   32.69   19.82
 -12  -5   6   59.67   28.76
  -5 -12   6   96.88   30.23
   5 -12   7   27.77   25.13
  -5 -12   7   45.96   19.40
 -12  -5   7   33.87   26.92
   5  12   7   68.07   30.77
 -12   5   7   44.25   27.62
  12  -5   7   42.55   23.88
  -5  12   7   40.71   29.96
  12   5   7   44.29   23.35
 -12   5   8   15.80   26.10
  -5 -12   8  -19.54   20.96
   5  12   8   27.95   23.21
 -12  -5   8   34.25   32.91
  12   5   8    4.89   18.55
   5 -12   8   -1.54   17.66
  -5  12   8    4.88   18.41
  12  -5   8   -2.52   16.04
  12  -5   9   35.69   32.09
  -5 -12   9  -14.92   19.68
 -12  -5   9  -28.66   34.04
  -5  12   9   34.07   31.87
   5 -12   9   16.44   19.76
 -12   5   9  -13.88   30.38
  12   5   9  -26.65   21.40
   5  12   9   36.31   24.16
  -5  12  10   26.00   24.26
  -5 -12  10  -26.30   32.18
   5 -12  10   29.91   26.27
 -12  -5  10    8.43   31.49
 -12   5  10   27.69   30.39
   5  12  10   10.25   21.56
  12  -5  10  -20.52   33.86
  12   5  10   -9.67   30.16
 -12  -5  11   -4.06   24.91
  -5 -12  11   10.51   23.69
 -12   5  11   36.56   27.79
  -5  12  11   10.97   22.97
   5  12  11   12.92   30.29
   5 -12  11   14.73   31.13
  12   6   0  410.44   28.65
  -6  12   0  387.81   26.45
   6  12   0  402.85   31.46
 -12  -6   1   31.61    9.43
 -12   6  -1   23.42    9.85
   6 -12   1   21.82    7.35
   6  12   1   15.43    5.65
  -6 -12   1   20.12    8.37
 -12   6   1   17.67    6.39
 -12  -6   1   13.18    6.96
  12   6   1   18.36    7.35
  -6  12   1   32.49   10.25
  -6  12   2  171.56   21.93
 -12   6   2  179.32   23.16
   6  12   2  174.27   23.41
  12   6   2  163.91   20.04
 -12   6  -2  168.11   25.78
 -12  -6   2  165.05   22.39
   6 -12   2  165.36   19.43
  12  -6   2  163.65   16.81
  -6 -12   2  180.21   22.80
 -12  -6   2  184.12   22.60
   6  12   3   99.16   19.86
 -12  -6   3  104.08   19.94
  -6  12   3   98.34   21.75
  -6 -12   3  129.56   22.78
  12  -6   3   85.34   16.30
  12   6   3   84.71   17.07
 -12   6  -3   86.78   17.43
   6 -12   3   98.40   18.66
 -12  -6   3  101.72   18.04
  -6 -12   3  104.69   14.24
 -12   6   3   96.67   21.95
  -6 -12   4   47.71   17.95
  -6 -12   4   47.33    7.98
  12  -6   4   47.51   16.75
 -12   6   4   82.44   24.02
 -12  -6   4   45.04   17.95
   6  12   4   48.83   18.80
  12   6   4   63.75   19.31
   6 -12   4   43.35   18.22
 -12   6  -4   68.68   17.23
  -6  12   4   68.60   20.87
 -12  -6   5   48.94   20.92
   6 -12   5    3.32   12.66
 -12   6  -5   21.59   10.81
  -6 -12   5   32.93   17.95
 -12   6   5   52.34   21.20
  -6  12   5   14.36   16.14
  12   6   5   24.90   16.53
   6  12   5    0.61   12.46
  12  -6   5    9.17   14.74
   6  12   6  101.56   29.50
 -12  -6   6   78.82   29.14
   6 -12   6   87.94   28.67
 -12   6   6   73.90   30.18
  12  -6   6   89.96   28.11
  -6 -12   6  137.83   33.12
  -6  12   6  103.84   30.89
  12   6   6   67.02   25.95
  12   6   7   29.39   15.83
  -6 -12   7  -33.46   24.15
   6 -12   7    2.68   21.11
 -12   6   7   -9.89   24.71
 -12  -6   7    9.62   23.39
   6  12   7   -0.98   14.62
  -6  12   7   32.86   24.82
  12  -6   7  -13.77   19.73
  12  -6   8   10.13   18.81
 -12   6   8   50.08   32.71
   6 -12   8   12.61   18.95
  -6  12   8  -15.46   25.99
   6  12   8    3.70   17.29
  12   6   8   30.10   25.02
 -12  -6   8    6.36   26.24
  -6 -12   8   17.54   16.82
  12   6   9  -11.24   19.73
  12  -6   9   26.44   28.65
 -12   6   9   19.54   28.50
   6  12   9   41.62   32.01
  -6 -12   9  -42.13   34.56
  -6  12   9   38.33   32.70
   6 -12   9  -70.10   33.15
 -12  -6   9   -4.02   24.41
   6 -12  10   43.41   39.27
 -12   6  10   14.55   27.66
  -6  12  10   25.60   24.33
 -12  -6  10   58.83   35.81
  12   6  10  -20.28   30.42
   6  12  10   37.23   35.02
  -6 -12  10    3.85   22.54
  12  -6  10   -4.52   21.74
   6  12  11   -7.59   24.41
  -6 -12  11    3.80   28.22
  -6  12  11   95.17   43.75
 -12  -6  11   22.28   32.27
 -12   6  11  -21.52   30.23
  -7  12   0   73.07   15.40
 -12   7   0   42.63    4.65
   7  12   0   40.15   14.11
  12   7   0   49.57   13.76
   7 -12   1  107.00   14.13
   7  12   1  130.81   20.45
 -12  -7   1  132.47   17.88
 -12  -7   1  117.47   19.51
  12   7   1  119.04   16.43
  -7 -12   1  132.11   20.49
  -7  12   1  127.75   16.95
 -12   7   1  111.80   13.32
   7 -12   2   12.25    6.35
 -12  -7   2   39.58   13.61
  12   7   2   13.47    7.88
 -12  -7   2   22.15    9.94
  12  -7   2   16.04    7.33
   7  12   2   20.64   12.04
 -12   7  -2   16.43    9.64
  -7 -12   2   56.67   14.25
  -7  12   2   19.95   10.87
 -12   7   2   18.50   12.68
  -7 -12   3   78.46   20.76
   7 -12   3   50.29   14.00
  -7  12   3   50.54   15.50
 -12   7   3   69.62   20.64
 -12   7  -3   30.64   10.30
 -12  -7   3   60.86   17.92
  -7 -12   3   43.78   10.65
   7  12   3   44.22   14.92
  12  -7   3   43.59   11.13
 -12  -7   3   51.07   13.76
  12   7   3   59.20   16.05
  12  -7   4   31.01   14.54
   7  12   4   53.19   18.96
 -12   7   4   53.72   20.93
 -12   7  -4   30.45   11.02
  -7 -12   4   33.89    7.65
  -7 -12   4   43.88   17.89
 -12  -7   4   63.59   20.68
  12   7   4   59.27   17.06
  -7  12   4   53.10   21.44
   7 -12   4   69.98   19.84
   7 -12   5   35.68   20.25
 -12   7  -5    2.17    6.54
  -7  12   5   12.88   11.97
  -7 -12   5   -3.01   10.40
   7  12   5   11.86   16.30
  12  -7   5   -3.68   13.15
 -12  -7   5    0.72   12.61
  12   7   5   12.82   15.06
 -12   7   5  -12.87   17.83
  12   7   6   66.00   24.14
 -12   7   6   75.02   30.58
   7 -12   6   93.93   35.33
 -12  -7   6   77.06   30.65
   7  12   6  121.20   34.02
  -7 -12   6   77.48   28.75
  -7  12   6  101.33   34.89
  12  -7   6  102.28   30.30
  12  -7   7   17.46   22.65
   7  12   7   69.10   27.25
 -12  -7   7   16.90   24.20
  -7 -12   7    3.58   17.79
   7 -12   7   11.15   15.46
  -7  12   7   12.16   24.03
 -12   7   7    5.14   15.31
  12   7   7   24.44   22.47
   7  12   8   26.16   25.39
 -12  -7   8   65.52   36.74
  -7 -12   8   -3.92   28.68
   7 -12   8  -17.17   17.35
  12  -7   8   51.30   24.47
  12   7   8   10.58   17.09
  -7  12   8  -16.25   27.72
 -12   7   8   54.00   30.49
  12  -7   9   20.92   23.04
   7 -12   9    2.98   21.71
  -7 -12   9  -61.55   34.64
  -7  12   9   18.66   23.08
 -12   7   9    8.18   25.25
 -12  -7   9   11.29   25.39
  12   7   9   -5.49   19.68
   7  12   9   43.65   31.89
  -7 -12  10  -11.02   26.02
  12   7  10  -16.95   23.34
 -12   7  10   10.14   29.21
   7 -12  10   28.41   33.00
  12  -7  10   41.15   36.36
   7  12  10   55.89   40.04
 -12  -7  10   74.73   37.62
  -7  12  10   21.09   25.57
  -7  12  11  -31.98   36.57
   7  12  11   59.27   41.28
  -7 -12  11    3.27   26.63
 -12  -7  11    0.37   23.02
 -12   7  11   -6.27   22.79
  12   8   0 2485.08   76.93
  -8  12   0 2494.02   65.06
   8  12   0 2473.14   78.78
 -12   8   0 2444.25   40.56
  12   8   1   49.29   12.51
  -8 -12   1   48.98   14.14
  -8  12   1   36.82   10.34
   8 -12   1   42.20    9.71
   8  12   1   40.81   13.61
  12  -8   1   38.38    5.44
 -12  -8   1   33.86   10.17
 -12   8   1   40.86    9.18
   8 -12   2    7.27    7.15
  12   8   2   16.55   11.72
 -12  -8   2   19.91   11.34
   8  12   2   17.62    9.77
 -12   8   2   17.33    9.75
  -8  12   2   13.90    9.79
 -12   8  -2   13.21    8.81
 -12  -8   2   11.54    8.65
  -8 -12   2  -29.40   18.53
  12  -8   2   11.16    4.60
  12  -8   3    9.84    8.92
 -12   8  -3    3.03    6.16
   8  12   3    7.22   11.63
 -12  -8   3   29.56   13.85
  -8 -12   3   -5.80    6.97
  -8  12   3   10.95    7.33
  -8 -12   3   12.27   10.48
  12   8   3   -9.95    7.62
 -12   8   3    3.44    8.29
   8 -12   3   11.47    7.16
 -12  -8   3   -1.80    6.15
  -8 -12   4   70.82   10.80
 -12   8   4   64.20   21.35
 -12  -8   4   72.82   21.81
   8 -12   4   80.85   21.65
 -12   8  -4   77.81   16.94
   8  12   4   61.42   17.90
  -8 -12   4   69.84   20.85
 -12  -8   4   77.18   14.90
  -8  12   4   61.59   22.62
  12   8   4   65.49   19.18
  12  -8   4   63.83   18.10
  -8 -12   5   20.48   18.03
 -12   8  -5   13.44    8.04
  12  -8   5   47.94   19.78
  -8  12   5   10.62   15.47
 -12  -8   5   60.71   20.98
   8  12   5   42.58   16.25
   8 -12   5   31.04   15.86
  12   8   5   25.45   18.19
 -12   8   5   52.46   22.40
 -12  -8   6  190.14   42.53
  -8  12   6  250.98   47.31
  -8 -12   6  246.06   46.09
  12  -8   6  251.52   45.64
 -12   8   6  188.99   42.29
   8  12   6  204.57   40.83
   8 -12   6  244.70   45.62
  12   8   6  257.62   44.39
   8  12   7   51.99   27.60
  12  -8   7   60.50   32.57
   8 -12   7   51.13   28.22
 -12   8   7   89.19   33.95
  -8 -12   7   61.35   29.29
  12   8   7   61.33   29.96
  -8  12   7   28.75   24.49
 -12  -8   7   68.39   32.46
   8  12   8  -29.42   19.27
  12   8   8   18.63   26.67
  -8 -12   8   22.99   17.67
 -12   8   8   -1.31   17.27
  12  -8   8  -29.44   25.52
  -8  12   8  -31.06   24.69
   8 -12   8  -35.38   25.68
 -12  -8   8   22.56   26.02
 -12  -8   9   32.17   31.09
  -8 -12   9  -26.80   23.24
 -12   8   9   16.41   23.39
   8  12   9   96.46   46.33
  12   8   9   -5.18   19.94
  12  -8   9   12.20   18.98
   8 -12   9   -5.46   25.00
  -8  12   9    7.59   23.13
   8 -12  10   33.06   34.05
 -12   8  10   13.69   28.60
 -12  -8  10   55.12   36.23
  12   8  10   75.72   42.02
  -8 -12  10   86.92   42.99
  12  -8  10   24.95   27.53
   8  12  10   21.61   37.19
  -8  12  10   14.44   25.98
  -8 -12  11   14.65   28.62
  -8  12  11   77.56   41.86
 -12  -8  11    0.45   32.70
   8  12  11   22.61   33.95
 -12   8  11   45.91   26.03
  -9  12   0   63.52   16.62
  12   9   0   24.24   14.95
   9  12   0   30.73   20.40
 -12   9   0    9.24    5.50
 -12  -9   1  105.12   16.76
   9  12   1   89.31   16.91
  12   9   1   92.56   16.71
  12  -9   1   94.43    8.68
   9 -12   1   84.73   12.09
 -12   9   1  100.63   12.78
  -9  12   1   94.98   14.51
  -9 -12   1  117.89   20.63
   9  12   2   12.16    9.47
 -12  -9   2   46.90   16.77
   9 -12   2   19.15    8.31
  12  -9   2   16.26    6.30
  -9  12   2   32.12   11.76
 -12   9   2   40.49   14.17
 -12  -9   2   23.71   10.89
  12   9   2    9.83    7.19
  -9 -12   3   21.95    8.46
   9  12   3   44.11   16.98
  -9 -12   3   11.70   17.22
   9 -12   3   27.29   11.57
  12   9   3   31.73   14.91
 -12   9   3   55.28   23.28
  12  -9   3   27.29   12.94
 -12  -9   3   43.01   16.83
  -9  12   3   38.15   15.48
 -12  -9   4   99.45   17.92
   9 -12   4   93.57   23.00
 -12   9   4  107.06   25.04
  12  -9   4  111.74   25.08
  12   9   4   92.13   22.55
 -12  -9   4  124.53   27.59
  -9 -12   4  109.14   25.41
  -9  12   4  129.34   27.67
  -9 -12   4   90.87   13.00
   9  12   4   92.98   23.57
  12   9   5   19.97   16.03
   9 -12   5   -2.23   13.44
  -9 -12   5   26.65   18.27
 -12  -9   5    3.69   16.21
 -12   9   5   13.92   11.81
   9  12   5   18.63   18.23
  -9  12   5   15.27   16.48
  12  -9   5   19.54   16.21
  12  -9   6  155.00   39.67
   9 -12   6  177.82   42.16
   9  12   6  181.98   44.10
  12   9   6  156.58   41.20
 -12   9   6  140.78   35.86
  -9  12   6  142.26   45.21
 -12  -9   6  175.09   46.58
  -9 -12   6  172.95   38.85
   9 -12   7   26.31   23.07
 -12  -9   7   69.42   34.65
  -9 -12   7   41.36   22.91
  -9  12   7   52.70   31.91
  12   9   7   41.78   30.39
   9  12   7   14.94   19.72
  12  -9   7   58.12   29.66
 -12   9   7   35.88   24.36
   9 -12   8   36.20   24.11
  -9 -12   8    0.27   17.99
 -12   9   8  -20.28   26.03
  -9  12   8  -19.71   18.07
  12   9   8   15.37   20.91
 -12  -9   8    3.37   25.66
  12  -9   8   20.73   25.45
   9  12   8    5.10   19.13
   9  12   9   80.75   49.92
 -12   9   9  146.70   56.18
   9 -12   9   62.94   37.43
  12   9   9   64.86   47.30
  12  -9   9   92.36   42.97
 -12  -9   9   89.27   40.91
  -9  12   9   70.36   32.98
  -9 -12   9   88.15   41.20
  -9 -12  10   54.16   33.88
 -12   9  10   34.61   21.45
  -9  12  10   69.44   41.05
  12  -9  10    5.45   21.69
 -12  -9  10   -6.23   28.02
  12   9  10    9.92   36.06
   9 -12  10    1.98   20.79
   9  12  10   46.98   44.23
  -9 -12  11   14.83   32.88
   9  12  11  -41.62   41.76
 -12  -9  11  -86.85   41.06
 -12   9  11  -33.56   34.54
  -9  12  11   28.61   29.07
  12  10   0 3562.55   96.33
  10  12   0 3537.63   99.32
 -12  10   0 3420.57   59.77
 -10  12   0 3463.24   73.11
  10 -12   1  168.90   16.08
  10  12   1  196.45   24.73
 -10  12   1  190.14   19.52
 -12  10   1  193.01   17.66
  12  10   1  196.10   24.19
  12 -10   1  197.89   13.93
 -12 -10   1  189.17   23.10
 -10 -12   1  240.71   27.85
  12  10   2   22.66   10.24
 -12 -10   2   18.11   10.45
 -12 -10   2   28.04   10.02
  10  12   2   21.27    8.64
 -10  12   2   19.00    8.88
 -12  10   2   12.39    5.12
  10 -12   2   26.49    9.04
  12 -10   2   17.99    6.14
 -12 -10   3   53.78   14.92
  10 -12   3   43.03   12.95
  12 -10   3   50.64   15.08
 -12 -10   3   46.13   17.21
 -12  10   3   33.39   15.68
  10  12   3   58.37   19.14
 -10 -12   3   34.83   13.91
 -10 -12   3   39.08    9.79
 -10  12   3   31.40   10.98
  12  10   3   43.89   14.00
 -10 -12   4  293.30   24.95
 -10  12   4  326.36   41.77
 -12  10   4  293.57   40.58
  12  10   4  273.11   37.12
 -12 -10   4  295.04   28.29
 -10 -12   4  280.98   38.17
  10  12   4  284.05   37.00
  12 -10   4  277.63   38.57
  10 -12   4  292.16   39.66
 -12 -10   4  323.41   41.51
  12  10   5  152.88   32.77
  10 -12   5  146.30   29.18
 -12 -10   5  162.35   31.75
 -10 -12   5  145.97   32.82
 -10  12   5  132.01   36.72
 -12  10   5  139.19   29.51
  10  12   5  137.46   32.01
  12 -10   5  135.70   28.75
 -12 -10   6  712.50   74.37
 -10 -12   6  714.00   74.41
 -10  12   6  776.12   80.17
  10  12   6  801.83   77.80
 -12  10   6  684.81   78.10
  12 -10   6  819.23   77.30
  10 -12   6  835.17   78.81
  12  10   6  777.18   78.10
  12 -10   7   82.34   33.42
  10 -12   7   77.00   37.67
 -10 -12   7   37.71   25.02
 -10  12   7   73.63   41.80
 -12 -10   7   59.45   27.78
  10  12   7   79.96   30.99
 -12  10   7   86.42   35.51
  12  10   7   58.90   30.70
  12 -10   8   44.49   29.85
 -10  12   8  -14.44   17.95
  10  12   8   50.55   35.36
 -12 -10   8   53.17   26.62
 -10 -12   8   22.18   18.70
 -12  10   8   56.30   27.90
  10 -12   8   18.66   19.22
  12  10   8  -10.67   18.27
 -12  10   9  121.32   45.47
  10  12   9  105.83   51.00
  10 -12   9  183.75   57.65
 -10 -12   9  129.03   55.78
  12  10   9  199.98   58.20
  12 -10   9  141.78   50.36
 -10  12   9  204.91   58.24
 -12 -10   9  140.27   46.59
  12 -10  10   52.40   35.67
  10 -12  10   44.11   27.03
 -10 -12  10   22.51   24.88
  10  12  10   46.29   32.95
 -12 -10  10    7.35   22.69
  12  10  10   48.71   38.07
 -10  12  10   21.85   25.59
 -12  10  10  -14.08   27.99
  10  12  11  -43.47   43.44
 -12 -10  11   -0.08   24.18
 -10 -12  11    8.75   23.21
 -12  10  11  -17.15   24.01
 -10  12  11   -8.67   30.73
  12  11   0   87.10   25.27
 -11  12   0  104.04   18.09
  11  12   0   64.80   22.65
 -12  11   0   51.37   14.99
 -11  12   1  115.96   16.75
  12  11   1   85.26   17.10
  12 -11   1  103.98   10.71
  11 -12   1   88.40   11.20
 -12  11   1  103.65   13.76
 -11 -12   1  120.12   21.95
  11  12   1  105.46   19.99
 -12 -11   1  114.17   21.24
 -11  12   2  134.95   20.00
  11 -12   2  129.83   17.32
 -12  11   2  180.36   26.38
  11  12   2  146.43   24.30
  12  11   2  128.20   20.98
 -12 -11   2  116.73   21.03
  12 -11   2  132.71   16.80
 -12 -11   2  154.76   27.86
 -11 -12   2  128.50   18.00
  12 -11   3   90.11   20.27
  11 -12   3   87.32   21.19
 -11 -12   3   94.55   18.71
  12  11   3   69.79   19.62
  11  12   3  106.29   25.10
 -11  12   3   72.21   21.41
 -11 -12   3   93.38   29.20
 -12 -11   3  151.90   27.90
 -11 -12   4  153.48   20.19
  12 -11   4  193.88   32.68
 -12 -11   4  142.12   20.68
  11  12   4  156.07   30.29
 -11 -12   4  204.32   35.35
  11 -12   4  180.04   30.76
  12  11   4  174.89   30.47
 -11  12   4  189.77   34.08
 -12 -11   4  210.83   37.80
 -12  11   4  205.84   36.35
  12  11   5    8.24   12.74
  12 -11   5   22.72   16.59
  11  12   5   32.40   21.40
  11 -12   5   11.14   14.78
 -12 -11   5   48.08   20.73
 -12  11   5   18.64   19.73
 -11 -12   5   48.76   27.12
 -11  12   5   36.17   18.64
  11 -12   6  248.94   48.38
 -11  12   6  266.04   57.71
  12  11   6  263.71   53.81
  11  12   6  232.76   50.96
 -12 -11   6  248.17   57.67
 -11 -12   6  283.46   57.19
 -12  11   6  196.05   53.17
  12 -11   6  255.00   48.21
  11 -12   7   61.98   33.53
  12  11   7   28.89   31.71
  11  12   7   57.03   28.33
 -12  11   7   25.21   19.67
 -11  12   7   65.86   36.16
  12 -11   7   39.43   26.40
 -11 -12   7   52.86   31.78
 -12 -11   7   63.42   31.19
 -12 -11   8   21.67   16.98
 -11 -12   8   85.60   37.64
 -11  12   8  -23.68   24.15
  11 -12   8   25.84   23.10
  12  11   8   65.83   35.98
 -12  11   8   42.23   26.83
  11  12   8   20.25   30.47
  12 -11   8   26.92   27.66
  12 -11   9  202.22   54.69
 -11 -12   9  103.79   45.66
 -12  11   9  216.83   62.89
  11 -12   9  193.28   56.93
 -12 -11   9  187.84   62.57
  11  12   9  185.87   60.64
 -11  12   9  220.19   63.71
  12  11   9  141.62   47.27
 -12  11  10   17.71   34.94
  12 -11  10   95.48   44.52
 -12 -11  10   52.84   30.65
  11  12  10   43.63   38.72
  11 -12  10   41.19   32.95
  12  11  10   96.62   49.23
 -11 -12  10  -13.65   27.41
 -11  12  10    9.72   27.16
 -12  11  11    6.47   26.71
 -12 -11  11   25.33   23.98
 -11 -12  11    0.08   22.85
  11  12  11   19.54   26.31
 -11  12  11  -40.15   34.66
  12  12   0 6759.83  144.32
 -12  12   0 7043.76   99.75
 -12  12   1  527.25   31.63
  12  12   1  510.18   40.28
 -12 -12   1  543.42   41.33
  12 -12   1  485.56   25.11
 -12 -12   2   16.57    7.61
 -12  12   2   25.55   10.80
  12 -12   2   28.68    9.37
  12  12   2   33.43   14.27
 -12 -12   3   35.24   10.95
  12  12   3   32.06   16.36
 -12 -12   3   15.41   11.60
  12 -12   3   21.73   11.08
 -12  12   3   26.22   13.37
 -12 -12   4  514.52   38.05
  12  12   4  470.53   49.74
 -12  12   4  569.33   55.71
  12 -12   4  508.57   49.01
 -12 -12   4  532.38   52.99
  12  12   5  130.67   30.05
  12 -12   5  130.01   29.59
 -12  12   5  124.01   27.98
 -12 -12   5  137.06   32.80
  12 -12   6  893.52   81.82
  12  12   6  976.75   84.32
 -12 -12   6  867.87   87.46
 -12  12   6  848.90   86.61
 -12  12   7   89.46   36.30
  12  12   7  109.63   38.69
  12 -12   7   56.68   27.07
 -12 -12   7   62.71   33.93
 -12  12   8   -8.15   26.68
  12 -12   8   54.94   27.96
 -12 -12   8   55.56   31.45
  12  12   8   59.07   32.54
  12  12   9  224.31   62.70
  12 -12   9  231.15   57.55
 -12  12   9  199.25   57.51
 -12 -12   9  225.95   64.49
  12  12  10  144.11   54.10
 -12 -12  10   88.82   41.18
 -12  12  10   81.31   44.74
 -12 -12  11  -16.63   34.79
 -12  12  11   70.89   51.22
   0  13   0   65.40   24.27
 -13   0   0   70.56   29.21
 -13   0   0   70.60   13.95
 -13   0  -1 1135.76   59.78
   0 -13   1 1077.00   51.13
   0  13   1 1026.52   51.07
 -13   0   1 1173.54   61.08
 -13   0   1 1159.12   46.11
  13   0   1 1075.90   32.01
   0 -13   2  131.57   20.93
  13   0   2  125.94   14.40
 -13   0   2  104.39   18.18
 -13   0  -2   91.88   18.77
 -13   0   2  124.96   21.72
   0  13   2  143.56   23.52
 -13   0   3  176.47   30.46
 -13   0  -3  226.89   30.10
  13   0   3  153.12   21.66
   0 -13   3  262.65   36.57
  13   0   4   89.50   20.15
   0  13   4   94.38   21.43
 -13   0   4   91.54   27.13
   0 -13   4   74.93   19.34
 -13   0   5    5.39   12.34
   0 -13   5   10.70   11.30
  13   0   5    2.85    9.41
   0  13   5   14.66   18.50
   0  13   6  381.96   57.63
  13   0   6  362.34   53.62
 -13   0   6  456.07   69.69
   0 -13   6  404.56   60.62
  13   0   7  129.65   41.64
 -13   0  -7  119.05   33.44
   0  13   7  106.08   39.58
 -13   0   7  105.15   38.57
   0 -13   7  126.82   45.61
 -13   0   8   72.39   37.19
   0  13   8   37.54   27.04
   0 -13   8   90.11   39.35
  13   0   8   49.23   32.83
  13   0   9  196.07   49.78
 -13   0   9   98.82   43.63
   0  13   9  108.53   52.76
   0 -13   9  126.61   43.34
   0 -13  10   99.47   49.27
   0  13  10  100.70   54.10
  13   0  10   53.47   35.00
 -13   0  10   72.86   46.03
 -13   0  11   12.37   26.77
   0  13  11   37.72   26.78
   0 -13  11  -14.26   37.42
 -13  -1   0   -5.82    5.14
 -13  -1   0   -4.16    7.62
 -13   1   0    3.56    2.64
   1  13   0  -12.67    7.70
 -13   1   0    6.95    9.23
  -1  13   0  -14.97    9.57
  -1 -13   1  953.89   48.37
 -13   1  -1 1105.34   59.46
   1 -13   1  934.58   46.58
   1  13   1  943.84   49.02
 -13   1   1  996.98   55.97
 -13   1   1  981.37   42.40
  13   1   1  920.49   32.51
  -1  13   1  841.34   45.97
 -13  -1   1  960.24   41.50
 -13  -1  -1  990.70   54.85
  13  -1   1  916.28   26.68
 -13  -1   1 1102.12   57.70
   1  13   2  842.69   50.34
 -13   1   2  868.62   53.91
 -13   1  -2  832.16   51.60
 -13   1   2  805.48   49.47
  13  -1   2  842.83   35.52
  -1  13   2  816.67   48.54
  13   1   2  811.05   37.66
   1 -13   2  757.48   43.63
  -1 -13   2  661.90   41.92
 -13  -1   2  853.88   50.45
 -13  -1   2  817.08   47.12
 -13  -1  -2  812.91   51.58
 -13   1   3 2959.32  112.61
  13  -1   3 3124.84   88.65
  -1 -13   3 3095.45  101.41
 -13  -1   3 2825.65  106.57
   1  13   3 3127.69  106.05
  -1  13   3 3209.24  106.77
  13   1   3 3202.49   92.55
   1 -13   3 2922.64   97.89
 -13   1  -3 2881.61  100.00
 -13   1   4  171.51   34.10
  13   1   4  154.75   25.20
 -13   1  -4   84.92   22.72
 -13  -1   4  155.81   32.44
  -1  13   4  169.69   28.77
  13  -1   4  158.82   25.35
   1 -13   4  133.21   26.69
   1  13   4  148.75   27.38
  -1 -13   4  132.97   24.58
  13  -1   5   15.03   10.70
 -13   1   5   12.78   18.48
  -1  13   5   10.50   16.44
   1 -13   5  -22.82   14.58
   1  13   5   14.91   15.05
 -13  -1   5  -11.96   19.51
  -1 -13   5    9.96   15.41
 -13   1  -5   14.94   11.30
  13   1   5   16.23   10.28
  -1  13   6  277.67   51.08
   1 -13   6  300.13   54.41
  13  -1   6  281.85   46.92
  -1 -13   6  282.82   50.92
   1  13   6  288.04   50.86
 -13   1  -6  401.09   52.33
 -13   1   6  326.67   58.34
  13   1   6  262.10   46.18
 -13  -1   6  268.44   55.95
   1  13   7  332.55   57.21
  13  -1   7  323.25   53.40
 -13  -1   7  391.24   61.76
   1 -13   7  372.34   60.80
  13   1   7  380.39   56.22
  -1  13   7  414.26   61.38
  -1 -13   7  409.97   62.43
 -13   1   7  378.88   60.53
  13   1   8  155.48   41.40
  13  -1   8  176.35   43.84
 -13   1   8  159.34   46.63
  -1  13   8  148.74   46.13
 -13  -1   8  157.62   41.40
   1  13   8  194.05   47.48
   1 -13   8  217.49   49.51
  -1 -13   8  176.58   45.64
   1  13   9  232.40   54.72
  13   1   9  132.48   43.35
 -13  -1   9  103.48   50.99
  -1  13   9  130.04   45.37
  -1 -13   9   96.35   43.85
  13  -1   9  150.54   50.62
 -13   1   9  107.33   46.27
   1 -13   9  137.52   52.47
  -1  13  10   74.69   34.15
 -13  -1  10  -27.95   20.02
  -1 -13  10   25.93   35.21
  13   1  10   96.56   40.96
 -13   1  10   73.12   45.02
   1 -13  10   34.90   37.82
  13  -1  10   22.67   29.43
   1  13  10  127.43   51.38
   1  13  11    4.02   29.21
 -13   1  11  -18.16   25.84
 -13  -1  11   32.77   31.60
   1 -13  11    0.71   23.85
  -1  13  11    7.28   30.39
  -1 -13  11  -26.98   35.41
 -13  -2   0    6.71    7.15
   2  13   0   22.26   13.64
  -2  13   0   -8.89    8.56
 -13   2   0   44.53   11.28
 -13  -2   0   10.23   12.49
 -13   2   0   28.08   22.18
 -13   2  -1  423.97   39.65
 -13   2   1  516.50   33.36
   2  13   1  472.97   35.76
   2 -13   1  499.53   33.81
 -13  -2   1  548.94   41.61
  -2 -13   1  482.61   35.45
  13   2   1  490.50   25.79
  13  -2   1  488.39   16.62
 -13   2   1  521.48   42.17
 -13  -2  -1  506.67   39.98
 -13  -2   1  551.79   32.73
  -2  13   1  482.26   34.20
  -2  13   2   44.47   16.58
   2 -13   2   42.34   13.63
  13   2   2   51.33   11.24
 -13  -2   2   47.38   14.32
 -13   2  -2   37.24   13.60
 -13   2   2   46.92   13.57
  -2 -13   2   48.45   15.78
 -13  -2   2   40.50   13.46
   2  13   2   61.34   18.68
  13  -2   2   47.75    9.61
  13   2   3  149.51   23.48
   2 -13   3  143.82   25.41
  -2 -13   3  215.15   34.42
 -13  -2   3  146.89   26.83
  13  -2   3  140.07   21.77
   2  13   3  235.85   41.20
  -2  13   3  195.21   38.55
 -13   2  -3  191.78   27.63
 -13   2   3  156.24   30.94
   2  13   4   79.88   22.37
 -13   2  -4   54.46   18.37
  13   2   4   72.08   19.23
  -2  13   4   66.23   19.62
  -2 -13   4   68.82   19.51
 -13   2   4   75.88   28.00
 -13  -2   4   91.05   28.51
   2 -13   4   72.83   20.69
  13  -2   4   74.19   20.45
  13  -2   5   10.15   12.43
  -2  13   5   33.93   16.94
  -2 -13   5   10.27   16.37
   2 -13   5   31.69   16.71
  13   2   5   19.61   14.04
 -13   2   5    9.52   16.32
   2  13   5   24.17   15.52
 -13  -2   5    7.12   17.86
 -13   2  -5   17.39   13.31
   2  13   6  389.93   57.21
  -2 -13   6  303.37   57.72
 -13  -2   6  367.63   59.97
  13  -2   6  328.44   49.81
   2 -13   6  323.79   57.23
  13   2   6  283.82   47.33
 -13   2  -6  358.20   45.87
  -2  13   6  286.63   52.74
 -13   2   6  339.23   61.17
 -13  -2   7  125.88   40.27
 -13   2   7   81.99   34.98
  13  -2   7   86.40   33.72
   2  13   7  121.91   39.38
  -2 -13   7  103.64   41.94
  13   2   7  120.36   39.06
  -2  13   7  123.70   40.99
   2 -13   7   72.13   31.43
 -13   2   8   34.32   30.75
 -13  -2   8   56.91   31.44
   2 -13   8  -18.88   20.18
  -2  13   8   29.94   30.08
  -2 -13   8   31.78   31.44
   2  13   8   46.38   29.34
  13   2   8   66.49   34.33
  13  -2   8   54.00   39.05
 -13  -2   9   67.10   42.87
 -13   2   9   51.71   36.98
   2  13   9   81.23   40.81
   2 -13   9  168.30   54.45
  13   2   9   51.92   35.30
  -2  13   9   91.21   45.34
  -2 -13   9   93.20   43.24
  13  -2   9   58.40   43.99
   2 -13  10   88.45   48.11
 -13   2  10   47.69   35.31
  13  -2  10   45.92   30.61
   2  13  10   70.00   44.12
  -2 -13  10  123.50   50.77
 -13  -2  10   86.04   42.95
  13   2  10   54.88   35.04
  -2  13  10   34.43   40.47
   2 -13  11   34.53   37.80
 -13  -2  11   41.32   36.77
   2  13  11  -34.43   37.84
 -13   2  11   74.49   36.26
  -2 -13  11   28.37   35.84
  -2  13  11   31.34   36.78
 -13   3   0    5.21    2.62
  -3  13   0  -17.69   12.06
 -13  -3   0   -5.18    6.58
   3  13   0   -7.11    9.03
 -13  -3   0   -4.25    4.88
 -13   3   0    8.39    9.97
 -13   3   1  211.83   21.68
  -3 -13   1  193.85   23.41
   3  13   1  189.62   24.20
  13   3   1  207.32   17.92
  -3  13   1  203.32   22.01
 -13  -3   1  214.49   26.16
 -13  -3   1  213.78   21.70
   3 -13   1  186.25   20.59
 -13  -3  -1  234.15   26.65
 -13   3  -1  223.91   29.61
 -13   3   1  243.46   30.30
   3  13   2  862.30   52.34
 -13  -3   2  831.41   47.08
 -13   3   2  817.59   52.53
  -3  13   2  828.40   49.16
  13   3   2  797.29   40.60
 -13   3  -2  835.97   52.66
  13  -3   2  855.60   33.43
  -3 -13   2  806.17   46.20
 -13  -3   2  831.48   49.26
   3 -13   2  828.75   44.22
   3  13   3 1674.69   78.56
  13  -3   3 1728.96   65.73
 -13  -3   3 1602.94   70.52
  -3 -13   3 1793.77   76.88
 -13   3  -3 1683.76   76.63
   3 -13   3 1725.44   74.38
  -3  13   3 1652.02   78.69
  13   3   3 1753.39   70.22
 -13   3   3 1660.57   85.25
 -13  -3   3 1666.69   78.13
  13  -3   4   34.69   14.94
  13   3   4   31.64   14.22
   3  13   4   35.85   14.49
 -13  -3   4   60.89   21.01
  -3  13   4   72.84   21.58
 -13   3  -4   28.85   13.04
 -13   3   4   45.28   23.32
  -3 -13   4   44.52   18.40
   3 -13   4   38.26   16.51
 -13   3   5   15.50   17.85
 -13   3  -5    5.39    8.44
   3  13   5   18.86   15.52
  13   3   5   10.72   11.82
  -3  13   5   16.40   18.10
  13  -3   5    4.38   10.66
   3 -13   5   -7.28   13.85
  -3 -13   5    3.32   11.78
 -13  -3   5   18.85   12.85
   3 -13   6  195.63   46.45
 -13   3   6  242.49   50.23
  -3 -13   6  273.31   45.96
  -3  13   6  245.82   48.45
  13  -3   6  185.09   39.97
 -13  -3   6  193.48   46.11
 -13   3  -6  243.28   36.71
  13   3   6  150.34   37.51
   3  13   6  191.82   42.80
  -3 -13   7  289.90   51.74
  13  -3   7  296.04   52.86
 -13  -3   7  267.88   56.07
  13   3   7  255.07   51.52
   3  13   7  256.44   46.38
  -3  13   7  260.29   50.60
   3 -13   7  292.68   54.22
 -13   3   7  298.90   56.83
   3  13   8   91.66   32.73
   3 -13   8  108.25   33.05
  -3 -13   8   97.80   36.94
  13  -3   8   87.39   33.90
  13   3   8   74.67   34.31
 -13  -3   8   96.16   38.75
  -3  13   8   77.88   33.06
 -13   3   8   82.21   38.65
 -13   3   9   -1.87   21.84
  -3  13   9   44.71   33.27
   3  13   9   51.88   38.44
  13   3   9   33.53   20.89
 -13  -3   9   79.16   33.23
  13  -3   9   55.88   34.92
  -3 -13   9   36.32   30.16
   3 -13   9   73.52   38.95
   3 -13  10   33.25   33.82
  -3 -13  10   56.42   37.68
 -13   3  10  -20.28   24.25
  -3  13  10   53.69   39.85
 -13  -3  10   74.92   45.23
  13   3  10   30.25   37.23
   3  13  10   42.09   34.86
  13  -3  10   -0.27   27.16
 -13   3  11    8.41   23.30
   3  13  11   -6.76   29.59
   3 -13  11   61.88   46.63
  -3  13  11  -25.36   28.82
  -3 -13  11   17.35   26.52
 -13  -3  11   19.08   27.20
  -4  13   0   39.87   15.25
 -13  -4   0   42.01   11.34
   4  13   0   53.72   16.05
 -13   4   0   44.58   20.31
 -13  -4   0   29.06   10.76
 -13   4   1   76.09   13.48
   4  13   1   64.33   14.40
  -4 -13   1   62.46   15.83
  13   4   1   70.07   11.17
 -13   4  -1   74.30   19.22
  -4  13   1   61.49   12.62
   4 -13   1   51.73   11.96
 -13  -4   1   69.47   16.95
 -13  -4   1   76.89   14.65
  13   4   2   48.35   11.44
 -13  -4   2   60.85   15.62
   4  13   2   75.81   20.39
 -13   4  -2   70.18   17.13
 -13   4   2   50.55   14.31
  13  -4   2   66.96    9.48
   4 -13   2   60.14   15.23
  -4  13   2   59.35   15.96
 -13  -4   2   62.79   13.87
  -4 -13   2   53.38   14.54
 -13  -4   3   60.03   19.48
 -13   4   3   51.15   19.40
  -4  13   3   51.29   23.23
 -13   4  -3   36.88   14.88
  13   4   3   22.93   12.46
   4  13   3   46.92   22.11
  13  -4   3   29.48   11.94
   4 -13   3   33.19   13.46
  -4 -13   3   72.15   22.99
 -13  -4   3   50.25   17.08
 -13   4  -4    9.23   11.74
 -13   4   4   27.01   20.14
   4 -13   4    5.82   11.82
  13   4   4   19.51   14.61
  -4  13   4    0.48   10.89
  13  -4   4    2.19    8.89
  -4 -13   4   20.18   14.80
   4  13   4   12.23   10.87
 -13  -4   4   11.03   12.12
   4 -13   5    3.57   10.48
 -13  -4   5   22.75   15.50
  -4  13   5   12.03   18.81
   4  13   5   14.46   18.77
  -4 -13   5    1.61   13.35
 -13   4  -5   -0.86    7.51
  13  -4   5    7.82   11.26
  13   4   5   18.18   13.89
 -13   4   5   19.46   21.72
 -13   4  -6  166.56   29.43
   4  13   6  120.85   36.21
  -4 -13   6  108.11   38.98
  -4  13   6  142.37   39.27
  13  -4   6  138.06   34.08
   4 -13   6  176.07   47.68
 -13   4   6  199.38   46.50
  13   4   6  115.31   32.73
 -13  -4   6  141.45   40.67
   4 -13   7   30.49   23.29
 -13   4   7   61.02   26.94
  -4  13   7  100.25   36.02
  -4 -13   7   44.54   29.90
 -13  -4   7   63.84   31.89
   4  13   7   63.01   28.53
  13   4   7   62.18   29.94
  13  -4   7   79.39   33.75
 -13  -4   8    7.56   16.70
   4  13   8    1.80   22.12
  13  -4   8   54.55   29.28
 -13   4   8   35.86   33.05
   4 -13   8   48.19   31.06
  -4 -13   8  -12.73   20.65
  -4  13   8   24.58   21.13
  13   4   8  -10.88   24.46
 -13   4   9    5.35   20.47
 -13  -4   9   15.63   25.12
   4  13   9    8.99   20.25
   4 -13   9    6.94   25.37
  13  -4   9   37.77   28.71
  -4 -13   9  -22.06   28.41
  13   4   9  -35.66   32.39
  -4  13   9   46.27   30.45
  -4 -13  10   29.46   32.21
   4  13  10   18.07   30.33
  -4  13  10   24.54   24.43
   4 -13  10   -9.66   28.11
  13  -4  10   19.54   29.22
  13   4  10   40.83   36.19
 -13  -4  10   60.63   41.02
 -13   4  10   41.29   35.90
 -13   4  11  -24.81   26.51
   4 -13  11   -2.90   23.43
  -4 -13  11  -23.01   27.65
 -13  -4  11    4.41   27.28
  -4  13  11   36.88   31.46
   4  13  11   18.42   29.92
  13   5   0    6.66    5.48
 -13  -5   0   -2.60    5.75
  -5  13   0   19.55    8.16
 -13  -5   0   23.48    8.43
 -13   5   0    5.29    7.67
   5  13   0   -0.69    5.40
   5 -13   1   -4.88    8.43
 -13  -5   1    6.36    7.74
 -13   5  -1   11.08    9.34
   5  13   1    2.13    6.23
 -13  -5   1    3.03    4.17
  -5 -13   1    4.50    4.95
 -13   5   1   10.62    3.53
  -5  13   1    3.78    4.47
  13   5   1   17.24    6.68
 -13  -5   2  154.05   22.04
  -5 -13   2  148.43   21.52
   5  13   2  121.64   21.89
 -13   5   2  145.42   22.11
  13   5   2  122.78   17.26
  -5  13   2  133.34   19.85
   5 -13   2  139.23   19.86
 -13   5  -2  121.89   22.40
  13  -5   2  129.45   13.36
 -13  -5   2  154.62   23.38
  13  -5   3  601.16   38.77
  -5  13   3  593.72   47.04
 -13  -5   3  585.50   46.99
  13   5   3  598.32   43.04
 -13  -5   3  552.93   40.92
 -13   5   3  606.87   49.88
   5 -13   3  613.29   43.79
   5  13   3  602.88   46.55
 -13   5  -3  565.27   44.95
  -5 -13   3  639.85   47.52
  -5  13   4   12.31   12.21
 -13   5  -4   16.94   12.01
 -13   5   4   13.72   16.68
   5  13   4   14.06   15.33
  13   5   4   14.23    9.95
  -5 -13   4    8.06    9.05
 -13  -5   4    7.46   10.97
   5 -13   4   16.45   10.21
  13  -5   4    5.58   10.14
  -5 -13   4   11.00    4.51
   5  13   5    8.51   13.32
  13  -5   5  -29.64   16.29
 -13   5   5  -17.10   14.64
   5 -13   5    6.65   10.14
  13   5   5   29.03   19.59
  -5  13   5    2.63   11.87
  -5 -13   5   34.30   21.38
 -13  -5   5   11.15   17.71
 -13   5  -5  -12.41    9.55
  -5 -13   6   63.97   22.29
   5  13   6   70.38   31.71
 -13   5  -6   74.87   19.04
 -13  -5   6   64.90   32.25
  -5  13   6   53.79   25.37
  13   5   6   66.85   28.56
   5 -13   6   56.17   24.66
  13  -5   6   65.33   24.57
 -13   5   6   75.68   32.31
  13   5   7   82.07   34.76
  -5  13   7   57.72   32.09
 -13  -5   7  100.59   34.29
  13  -5   7   69.32   27.75
   5  13   7   86.01   26.99
   5 -13   7  102.59   30.24
  -5 -13   7   97.99   31.93
 -13   5   7   75.01   30.55
  13  -5   8    1.49   18.61
 -13  -5   8   31.02   27.63
   5 -13   8   43.44   28.80
  -5 -13   8  -20.36   22.53
  13   5   8   -7.45   18.36
   5  13   8  -18.99   17.17
 -13   5   8   47.37   31.05
  -5  13   8    3.51   23.42
 -13   5   9  -43.45   29.33
  13  -5   9   15.85   22.79
  -5 -13   9   26.34   25.49
   5 -13   9   26.63   32.40
  13   5   9   18.92   26.34
   5  13   9  -41.32   27.34
 -13  -5   9   22.33   23.71
  -5  13   9    5.44   21.99
 -13   5  10   13.10   24.96
   5 -13  10  -17.08   25.98
   5  13  10   -6.44   31.16
  -5 -13  10  -63.93   38.94
  13  -5  10   39.31   25.11
  -5  13  10  -20.05   27.42
 -13  -5  10   42.61   33.00
  13   5  10    1.35   31.17
 -13  -5  11   -7.45   23.56
  -5 -13  11  -69.16   41.45
  -5  13  11  -48.54   29.04
   5  13  11   29.12   33.38
 -13   5  11   78.75   42.02
   6  13   0  244.82   26.17
  13   6   0  246.33   23.48
  -6  13   0  231.14   22.29
  13   6   1   27.95    9.02
 -13   6   1   26.02    7.33
 -13   6  -1   32.00   13.82
   6 -13   1   19.35    6.23
  -6 -13   1   24.16   10.81
   6  13   1    6.11    6.63
 -13  -6   1   34.48    9.57
 -13  -6   1   28.58    9.40
  -6  13   1   30.27    9.59
  13  -6   2  284.38   19.90
  -6 -13   2  270.05   25.92
 -13   6   2  287.67   29.04
  13   6   2  242.63   24.73
   6 -13   2  257.47   25.53
   6  13   2  263.65   28.98
 -13  -6   2  263.90   28.39
  -6  13   2  256.51   27.09
 -13  -6   2  288.14   28.15
 -13   6  -2  254.77   30.20
 -13  -6   3   73.37   17.85
 -13  -6   3   58.50   15.53
  13   6   3   43.97   12.81
 -13   6   3   62.97   19.29
  -6  13   3   67.68   19.70
 -13   6  -3   52.59   13.97
   6  13   3   47.18   14.60
   6 -13   3   57.79   15.10
  13  -6   3   67.39   14.52
  -6 -13   3   60.81   16.72
  -6 -13   4   21.27    5.09
 -13   6   4   37.60   18.59
  13   6   4   21.17   11.41
 -13   6  -4   19.58    9.63
 -13  -6   4   28.54   15.10
   6 -13   4   23.78   14.36
  -6 -13   4   27.13   16.16
  -6  13   4   16.69   13.07
   6  13   4   23.98   15.40
  13  -6   4   11.56   11.88
 -13  -6   5   -1.89   11.51
 -13   6   5   53.97   27.72
   6 -13   5   -3.81   15.21
   6  13   5    3.62   14.45
 -13   6  -5   -8.70    9.40
  -6 -13   5   33.85   20.64
  13  -6   5   37.46   19.95
  13   6   5    7.71   14.11
  -6  13   5   12.49   19.20
 -13   6   6   53.65   30.97
  13   6   6   42.32   20.60
   6 -13   6   25.68   19.96
   6  13   6   56.88   27.93
 -13   6  -6   23.68   11.25
 -13  -6   6   53.01   27.14
  -6 -13   6   23.63   22.34
  13  -6   6   23.59   16.13
  -6  13   6    3.67   15.01
 -13  -6   7  -16.74   18.59
   6 -13   7   13.17   17.15
  -6 -13   7   40.32   23.13
   6  13   7   22.00   20.44
 -13   6   7   -4.45   18.81
  -6  13   7    1.77   16.41
  13   6   7    2.61   15.61
  13  -6   7   17.77   19.85
   6 -13   8   24.77   24.13
 -13  -6   8   30.79   21.73
  -6  13   8   42.37   25.54
   6  13   8  -27.51   26.69
  -6 -13   8  -37.65   30.97
 -13   6   8   22.76   23.50
  13  -6   8   -4.43   20.04
  13   6   8   16.85   23.95
   6 -13   9   34.79   21.28
  13   6   9   51.76   29.07
  -6  13   9    7.49   21.55
   6  13   9   35.55   32.66
  -6 -13   9  -65.27   31.71
  13  -6   9    4.86   20.68
 -13  -6   9   -3.64   28.69
 -13   6   9    0.06   19.80
  -6  13  10  -69.97   38.32
  -6 -13  10   -0.91   22.43
   6  13  10  -12.77   23.22
 -13  -6  10   65.41   38.20
  13   6  10   -7.41   31.70
 -13   6  10   10.07   19.99
   6 -13  10    5.91   25.28
  13  -6  10  -19.40   21.90
  -6  13  11   -4.83   31.22
  -6 -13  11   -8.32   27.50
 -13  -6  11   -2.36   22.25
   6  13  11   28.61   24.95
 -13   6  11   37.62   34.12
  -7  13   0   25.38   10.29
  13   7   0   43.75   13.22
   7  13   0   38.54   13.01
 -13   7   1  254.44   19.54
   7  13   1  253.49   27.75
   7 -13   1  252.35   22.94
 -13  -7   1  261.34   25.25
 -13  -7   1  264.96   28.68
  -7  13   1  240.80   24.06
  13   7   1  263.22   24.79
  -7 -13   1  312.75   30.23
 -13   7  -1  263.18   31.66
 -13  -7   2   29.08   12.88
 -13  -7   2   21.19   10.20
   7  13   2   23.01   11.53
  -7  13   2   23.67   10.95
 -13   7   2   26.48   11.15
   7 -13   2   17.05    7.61
  13   7   2   10.65    7.32
 -13   7  -2   23.14   13.09
  13  -7   2   19.66    6.66
 -13   7  -3  117.24   22.61
 -13  -7   3  141.19   25.60
 -13  -7   3  129.76   20.50
   7  13   3  125.25   22.49
   7 -13   3  131.00   21.14
  -7 -13   3  137.22   23.21
  13  -7   3  123.66   19.25
  13   7   3  132.01   23.01
  -7  13   3  138.87   24.78
 -13   7   3  137.54   27.08
  -7 -13   4   73.54   10.71
 -13   7   4  116.55   29.48
  13  -7   4   79.40   20.20
 -13   7  -4   66.31   18.66
  -7 -13   4  112.50   23.90
 -13  -7   4  107.26   28.11
   7  13   4  105.97   22.61
 -13  -7   4   78.20   16.81
   7 -13   4  102.26   22.92
  -7  13   4   89.49   20.04
  13   7   4   92.54   21.17
  -7 -13   5   18.99   16.22
  13  -7   5    8.08   11.67
 -13   7  -5   38.34   15.42
 -13   7   5   -9.45   11.60
 -13  -7   5   -6.38   14.00
  13   7   5   33.37   20.07
   7  13   5   14.68   19.58
  -7  13   5    0.63   13.55
   7 -13   5   -1.69   12.95
 -13   7   6   48.10   29.28
  13  -7   6   33.38   17.98
  -7 -13   6   29.33   18.01
 -13  -7   6   38.94   24.70
   7  13   6   34.36   21.06
  13   7   6   25.90   18.97
   7 -13   6   71.79   28.84
  -7  13   6   66.92   27.58
   7  13   7   15.59   19.14
 -13  -7   7    6.86   17.27
  13   7   7   26.95   16.60
  13  -7   7   33.35   18.42
 -13   7   7   17.45   20.22
  -7 -13   7    4.79   18.34
  -7  13   7   -1.69   20.02
   7 -13   7   12.61   15.16
  -7  13   8   63.17   35.47
 -13  -7   8   71.41   36.30
  13   7   8   14.58   19.18
   7  13   8   15.39   20.32
   7 -13   8   36.31   31.65
 -13   7   8    8.07   19.85
  13  -7   8   28.20   23.36
  -7 -13   8   63.21   26.34
 -13  -7   9   25.88   30.08
   7 -13   9    6.66   18.94
  -7 -13   9   30.38   25.76
 -13   7   9   10.75   21.47
  13  -7   9   35.20   29.51
  13   7   9   75.49   35.62
  -7  13   9   20.65   22.84
   7  13   9   68.84   38.80
  -7  13  10   23.62   31.23
   7  13  10  -11.43   32.28
  -7 -13  10  -12.61   32.87
  13  -7  10   31.34   31.82
  13   7  10   13.92   26.35
 -13  -7  10    2.23   36.92
 -13   7  10  -31.50   33.77
   7 -13  10   39.24   35.57
  -7 -13  11  -14.40   24.32
 -13   7  11  -13.36   25.00
   7  13  11  -30.05   31.96
  -7  13  11   20.00   31.96
 -13  -7  11  -73.19   37.82
  13   8   0  409.74   33.23
   8  13   0  466.23   39.19
 -13   8   0  432.72   17.08
  -8  13   0  440.83   31.11
  -8 -13   1  133.99   24.72
   8 -13   1   63.80   12.61
 -13  -8   1   72.24   14.39
  13   8   1   80.10   16.80
  -8  13   1   78.06   15.27
 -13  -8   1   80.23   18.01
 -13   8   1   72.86   11.79
   8  13   1   73.84   18.70
  -8  13   2   35.58   13.02
  13  -8   2   24.96    7.87
 -13   8  -2   24.37   12.65
 -13  -8   2   36.09   11.81
 -13   8   2   22.94    8.71
   8 -13   2   27.23    8.69
  13   8   2   32.52   11.75
 -13  -8   2   39.03   14.19
   8  13   2   34.29   12.59
   8 -13   3   -0.82    5.98
  13  -8   3   14.10   10.26
   8  13   3   -0.25    6.82
 -13   8  -3    9.90    8.86
  -8 -13   3    1.61    4.73
 -13  -8   3   13.08    8.32
  -8  13   3   19.50   13.34
 -13   8   3   -4.32   11.18
 -13  -8   3   -0.71    8.15
  13   8   3    2.69   13.02
  13  -8   4   53.09   18.35
 -13  -8   4   80.35   23.58
  -8 -13   4   87.76   23.75
   8  13   4   74.86   23.93
  -8 -13   4   75.56   11.94
 -13   8   4   70.37   23.00
  -8  13   4   80.99   25.79
   8 -13   4   70.85   21.85
  13   8   4   87.54   21.46
 -13   8  -4   64.29   16.70
 -13  -8   4   67.75   16.16
  13  -8   5   34.49   17.18
   8 -13   5   33.94   18.52
 -13  -8   5   20.78   22.71
  -8  13   5   37.59   19.54
 -13   8   5   31.63   22.80
   8  13   5   41.33   20.20
 -13   8  -5   17.10   12.02
  -8 -13   5   32.20   17.89
  13   8   5   31.90   19.02
 -13   8   6   96.66   37.00
   8 -13   6   54.90   26.57
   8  13   6   35.56   19.84
  -8 -13   6   65.63   26.49
  -8  13   6   57.53   28.22
 -13  -8   6  105.43   34.02
  13   8   6   37.01   21.24
  13  -8   6   73.65   28.75
  -8 -13   7   74.82   31.72
   8  13   7   12.22   17.91
  13  -8   7   55.85   23.97
   8 -13   7   74.11   33.56
 -13  -8   7   84.73   35.88
 -13   8   7   16.01   20.38
  13   8   7   50.11   26.93
  -8  13   7   57.51   31.07
  13  -8   8   60.81   30.49
  -8 -13   8  -12.52   16.89
 -13  -8   8   10.49   25.14
 -13   8   8   27.64   22.60
   8 -13   8   39.76   29.67
  13   8   8   10.57   23.57
  -8  13   8    2.61   26.56
   8  13   8  -30.64   25.38
  -8 -13   9  -13.01   24.91
   8  13   9   94.08   43.66
 -13   8   9   38.67   34.28
   8 -13   9   72.82   30.32
  13   8   9   33.88   38.64
  13  -8   9   91.98   39.43
 -13  -8   9  100.03   44.18
  -8  13   9   48.85   36.28
  -8  13  10   -2.78   21.77
 -13  -8  10   38.75   37.07
  13   8  10  -20.58   30.48
   8  13  10   99.68   50.32
   8 -13  10   30.76   30.60
 -13   8  10    1.65   28.28
  -8 -13  10    8.10   23.44
  13  -8  10   19.58   28.14
  -8 -13  11    3.78   24.96
  -8  13  11   37.69   39.40
 -13   8  11   67.69   28.72
 -13  -8  11    0.08   24.38
   8  13  11   17.41   34.60
   9  13   0   46.57   14.62
 -13   9   0   42.91    6.95
  13   9   0   45.45   14.05
  -9  13   0   46.66   10.77
  13  -9   1  114.60    9.24
 -13   9   1  126.11   14.02
  13   9   1  121.37   18.52
  -9  13   1  129.67   18.14
   9  13   1  122.85   20.43
  -9 -13   1  194.43   27.55
 -13  -9   1  125.97   19.75
   9 -13   1  114.21   15.77
  -9  13   2  314.97   29.88
  13  -9   2  310.79   23.88
  -9 -13   2  339.87   32.94
   9 -13   2  336.54   27.49
 -13  -9   2  362.37   34.41
   9  13   2  323.56   34.56
  13   9   2  323.05   32.24
 -13   9   2  361.89   29.66
 -13  -9   2  356.22   33.80
  -9  13   3 1089.89   63.78
  13   9   3 1083.40   61.41
 -13  -9   3 1106.07   65.02
  13  -9   3 1053.59   57.69
  -9 -13   3 1222.51   69.01
   9  13   3 1106.30   64.65
  -9 -13   3 1116.18   53.15
 -13  -9   3 1065.74   56.53
   9 -13   3 1160.94   60.22
 -13   9   3 1057.52   64.55
 -13  -9   4  162.58   22.46
   9 -13   4  180.96   29.57
 -13  -9   4  214.89   35.09
  -9 -13   4  141.70   16.79
   9  13   4  178.08   31.58
  13   9   4  208.41   32.68
 -13   9   4  213.25   38.20
  -9 -13   4  196.85   34.98
  13  -9   4  181.65   31.74
 -13   9  -4  169.28   26.95
  -9  13   4  232.90   36.99
 -13  -9   5    0.91   10.65
   9  13   5   14.46   15.55
   9 -13   5    7.01   13.94
 -13   9   5   30.45   19.73
 -13   9  -5   22.26    9.95
  13  -9   5   15.09   14.26
  13   9   5   14.22   18.07
  -9 -13   5    2.98   15.62
  -9  13   5   30.10   21.76
 -13   9   6   89.58   33.63
   9 -13   6  115.31   38.12
  13  -9   6   92.56   32.39
 -13  -9   6   90.40   35.66
  -9 -13   6   77.95   31.92
   9  13   6  123.63   33.94
  13   9   6  117.43   38.89
  -9  13   6  101.37   42.09
 -13   9   7   50.18   26.96
   9 -13   7   98.16   32.80
   9  13   7   69.07   29.40
  13   9   7   49.23   26.76
  -9 -13   7   85.42   32.50
  13  -9   7   40.04   17.16
  -9  13   7   71.11   29.11
 -13  -9   7   84.44   33.03
  13  -9   8   -0.35   16.28
 -13  -9   8   20.82   26.68
   9 -13   8    8.96   19.42
  -9 -13   8   31.97   27.32
  13   9   8    5.85   17.13
 -13   9   8   -7.22   17.88
  -9  13   8   48.36   27.34
   9  13   8   33.38   29.77
   9 -13   9  101.26   45.90
  -9 -13   9  100.86   39.71
  13   9   9  113.55   49.72
 -13   9   9  125.35   48.38
   9  13   9  148.20   47.00
 -13  -9   9  127.46   53.01
  -9  13   9  113.52   47.62
  13  -9   9  115.55   43.01
  13  -9  10   -4.50   20.25
   9 -13  10   35.29   30.46
  13   9  10   66.37   35.40
   9  13  10   48.65   36.78
 -13   9  10   49.13   33.49
 -13  -9  10   63.45   42.00
  -9  13  10   14.22   22.52
  -9 -13  10    9.27   30.05
  -9  13  11   28.21   39.40
 -13   9  11  -62.46   38.62
  -9 -13  11   19.42   34.02
   9  13  11    9.71   33.00
 -13  -9  11   25.68   40.09
 -13  10   0  166.08   14.63
  10  13   0  185.91   32.06
  13  10   0  127.37   21.32
 -10  13   0  134.07   18.21
 -13  10   1   85.35   12.75
  13  10   1   70.40   15.60
  10  13   1   55.40   15.66
  10 -13   1   71.27   12.02
  13 -10   1   66.93    7.61
 -13 -10   1   86.86   18.33
 -10  13   1   71.86   13.83
 -10 -13   1  111.31   19.30
 -13 -10   2   13.00    9.37
  13  10   2   23.60   12.67
 -10  13   2   23.68   13.15
 -13  10   2   10.93    6.41
  10  13   2    8.35   12.21
  10 -13   2    7.09    5.72
  13 -10   2   11.04    6.19
 -13 -10   2   10.40    6.02
  10 -13   3  148.05   24.63
  10  13   3  157.55   28.91
  13  10   3  142.65   26.32
 -13 -10   3  171.98   30.05
 -10 -13   3  212.84   26.18
 -10  13   3  213.45   38.13
 -13 -10   3  186.73   25.72
  13 -10   3  154.14   24.57
 -13  10   3  160.54   27.94
 -10 -13   4  156.66   19.28
  10 -13   4  171.72   29.95
 -13  10   4  178.17   34.78
  13  10   4  181.23   31.23
 -10  13   4  196.04   35.03
 -13 -10   4  152.62   22.19
 -13 -10   4  205.91   35.88
 -10 -13   4  145.86   33.64
  10  13   4  176.30   31.26
  13 -10   4  171.50   30.66
  10  13   5   50.27   24.25
  13 -10   5   39.80   20.04
 -10 -13   5   35.36   27.83
  13  10   5    3.40   15.86
 -13  10   5   48.36   25.20
  10 -13   5   38.94   20.87
 -10  13   5   44.94   25.13
 -13 -10   5   44.29   25.96
 -10 -13   6  223.04   49.74
 -13 -10   6  232.88   46.54
 -13  10   6  241.61   53.14
  13 -10   6  213.69   44.63
 -10  13   6  240.34   53.35
  10  13   6  193.33   45.37
  10 -13   6  212.07   44.85
  13  10   6  254.16   46.78
  10 -13   7   78.10   31.81
 -13 -10   7   75.48   31.57
 -10 -13   7   38.24   30.77
  13 -10   7   45.35   23.10
  13  10   7   62.59   36.06
 -13  10   7   65.81   29.01
  10  13   7   68.65   31.88
 -10  13   7   58.82   34.19
  10  13   8   53.25   30.64
  10 -13   8    6.31   19.71
  13  10   8   24.11   24.36
 -13  10   8    1.82   17.64
 -10 -13   8   11.59   16.85
 -13 -10   8   31.28   25.62
  13 -10   8   44.91   26.88
 -10  13   8   74.71   33.74
 -10  13   9  115.76   42.31
 -10 -13   9  131.42   46.90
  10  13   9  242.26   61.44
  13  10   9  204.73   59.70
  10 -13   9  155.84   55.06
 -13 -10   9  197.64   59.67
 -13  10   9  207.70   58.36
  13 -10   9  130.14   45.49
 -13 -10  10    0.07   23.11
  10 -13  10   40.01   33.15
 -10 -13  10   43.21   35.77
 -10  13  10   20.87   29.12
 -13  10  10   61.54   39.59
  13  10  10    3.77   27.33
  10  13  10   20.61   31.25
 -10 -13  11    0.08   29.46
 -13 -10  11    7.68   31.26
  10  13  11  -54.14   36.61
 -13  10  11  -56.66   41.17
 -10  13  11  -55.94   37.36
 -13  11   0  -14.30    6.16
 -11  13   0  -22.79    8.20
  13  11   0  -19.12   13.42
  11  13   0   -3.29    8.21
 -11 -13   1  185.54   26.41
  11  13   1  150.94   23.67
  13 -11   1  141.78   12.49
 -13  11   1  140.78   15.23
  13  11   1  149.67   21.63
  11 -13   1  130.42   15.01
 -11  13   1  131.09   17.14
 -13 -11   1  158.58   22.87
 -13 -11   2 1073.82   60.90
  11 -13   2  970.72   46.30
  13 -11   2  977.99   43.78
  11  13   2  911.57   57.68
 -13  11   2  996.96   51.07
 -13 -11   2  953.83   57.23
 -11 -13   2 1046.53   57.52
 -11  13   2  959.83   51.81
  13  11   2  905.65   55.31
  11 -13   3 2912.01   98.31
 -11 -13   3 3019.28  110.55
  13  11   3 2879.34  103.08
 -13  11   3 2926.83  106.02
  11  13   3 2882.26  105.15
 -11 -13   3 2917.58   94.77
 -11  13   3 2990.95  106.58
 -13 -11   3 2819.27  109.17
 -13 -11   3 2841.61   95.62
  13 -11   3 2925.18   97.46
  13 -11   4  262.96   36.75
 -13 -11   4  203.02   25.87
 -11  13   4  292.94   41.71
 -13 -11   4  225.31   37.82
 -11 -13   4  206.69   22.96
  11  13   4  262.11   39.39
  13  11   4  308.53   40.19
 -11 -13   4  267.84   42.55
  11 -13   4  263.76   36.95
 -13  11   4  270.50   41.27
  13 -11   5   17.89   14.23
  11 -13   5   26.25   18.58
 -13  11   5    2.86   12.04
  11  13   5   -6.50   11.33
  13  11   5   25.93   17.19
 -13 -11   5   25.16   19.85
 -11  13   5   54.43   22.98
 -11 -13   5   34.39   20.45
 -11  13   6  216.25   50.20
  11  13   6  170.36   42.37
 -13 -11   6  161.53   46.60
  13 -11   6  166.46   38.04
 -11 -13   6  242.23   48.72
  11 -13   6  182.23   43.14
  13  11   6  164.12   42.47
 -13  11   6  160.32   46.17
 -13 -11   7   83.69   31.88
  11 -13   7  132.17   38.64
 -11 -13   7  157.35   44.21
  13  11   7  169.96   42.55
 -11  13   7  129.21   43.09
  11  13   7   88.35   32.80
  13 -11   7  126.67   35.39
 -13  11   7  111.34   37.93
  11 -13   8   71.02   26.91
 -13  11   8   84.82   37.24
 -11 -13   8   23.70   23.01
  11  13   8   33.24   20.32
  13  11   8   42.48   25.99
  13 -11   8   65.12   30.97
 -13 -11   8  108.82   41.85
 -11  13   8   40.94   26.03
  13 -11   9  155.89   49.45
 -11 -13   9  134.64   48.19
  13  11   9  303.03   67.82
  11 -13   9  201.12   60.51
  11  13   9  166.67   56.12
 -13 -11   9  201.58   58.52
 -13  11   9  256.55   67.39
 -11  13   9  205.90   58.32
  11  13  10   14.47   34.22
 -11  13  10    6.76   23.30
 -13 -11  10    2.34   19.93
 -13  11  10   -9.37   23.62
 -11 -13  10   14.19   24.79
  13  11  10   38.53   39.23
  11 -13  10    9.91   28.98
 -13 -11  11   28.05   33.81
 -11 -13  11  -14.81   31.07
 -11  13  11  -51.49   36.34
 -13  11  11   13.71   25.46
 -13  12   0   78.81   15.14
 -12  13   0   81.24   22.48
 -13  12   1  265.09   22.25
 -12  13   1  234.88   21.93
  12 -13   1  203.48   17.53
  12  13   1  217.26   28.50
  13 -12   1  211.40   15.97
  13  12   1  217.70   27.18
 -13 -12   1  262.38   31.05
 -12 -13   1  282.41   32.98
 -13 -12   2  102.78   19.03
  13 -12   2  101.71   15.03
 -12  13   2  107.42   21.05
  12  13   2  104.40   20.67
 -12 -13   2  128.17   23.82
  12 -13   2   82.13   13.18
 -13 -12   2   97.71   19.78
 -13  12   2  111.41   18.96
  13  12   2   87.31   20.30
  13  12   3  120.10   31.81
  12 -13   3  105.47   21.56
 -12  13   3  223.65   40.77
 -13 -12   3  132.91   30.78
 -13 -12   3  154.12   24.81
  12  13   3  106.37   29.20
 -13  12   3  107.51   25.95
 -12 -13   3  275.59   48.00
  13 -12   3  108.70   21.72
 -12 -13   3  171.72   27.04
  12 -13   4  262.97   37.85
 -13  12   4  333.48   44.35
  12  13   4  293.86   39.07
 -13 -12   4  312.15   45.04
 -12 -13   4  270.79   27.71
  13  12   4  262.38   38.76
 -12  13   4  302.12   44.65
 -12 -13   4  247.61   41.21
  13 -12   4  277.18   38.86
 -13 -12   4  248.52   28.68
  13 -12   5   16.67   15.91
  13  12   5   38.79   20.64
  12 -13   5    4.61   13.60
 -13 -12   5   29.49   20.30
  12  13   5   20.08   23.78
 -12 -13   5   12.49   18.69
 -12  13   5   37.69   25.53
 -13  12   5   34.57   19.01
  13 -12   6  220.83   41.14
 -12 -13   6  401.70   64.25
  12 -13   6  266.98   49.88
  12  13   6  263.28   55.37
 -12  13   6  217.99   51.43
 -13  12   6  289.09   57.08
 -13 -12   6  373.30   62.17
  13  12   6  241.06   49.49
  12  13   7   53.77   32.27
  13 -12   7   42.36   21.02
  13  12   7   78.93   38.25
  12 -13   7   50.21   30.42
 -13  12   7   80.93   34.69
 -13 -12   7   82.30   37.11
 -12  13   7   47.77   34.26
 -12 -13   7   80.59   36.27
  13 -12   8   41.74   30.74
 -13  12   8   13.75   32.32
  12  13   8   12.15   25.17
 -12 -13   8    4.29   22.25
  12 -13   8   28.30   24.95
  13  12   8   46.78   33.74
 -12  13   8   52.14   29.46
 -13 -12   8   38.12   33.42
  12 -13   9  224.10   59.67
 -12  13   9  227.80   66.34
 -13 -12   9  304.09   67.21
  13 -12   9  148.94   47.47
 -13  12   9  358.82   74.11
  13  12   9  198.70   62.46
 -12 -13   9  205.90   61.59
  12  13   9  226.78   66.19
 -12 -13  10   82.50   43.59
 -13 -12  10   38.46   34.70
  13  12  10  149.93   56.52
 -13  12  10   66.78   43.77
 -12  13  10   43.06   38.14
  12  13  10   50.94   37.86
 -13 -12  11  -47.71   37.44
 -12 -13  11  -77.29   36.21
 -13  12  11  -12.37   23.11
 -12  13  11   18.82   32.05
  13  13   0  -37.15   17.86
 -13  13   0    0.50    6.64
 -13 -13   1  298.43   32.46
 -13  13   1  278.51   23.26
  13 -13   1  263.10   19.36
  13  13   1  271.55   31.39
  13  13   2  322.33   34.74
  13 -13   2  348.16   27.88
 -13  13   2  343.03   30.90
 -13 -13   2  337.61   35.36
 -13 -13   3 2590.10   95.96
 -13  13   3 2676.57  101.69
  13 -13   3 2612.82   92.79
  13  13   3 2558.53  101.58
 -13 -13   3 2276.20  102.77
  13 -13   4  396.45   43.47
 -13 -13   4  315.32   31.12
 -13 -13   4  364.23   47.20
 -13  13   4  425.35   49.78
  13  13   4  354.85   44.50
  13  13   5   35.00   22.32
  13 -13   5   24.07   16.95
 -13  13   5   43.94   22.43
 -13 -13   5   11.19    7.88
 -13 -13   5   30.27   16.53
 -13  13   6  161.79   46.98
 -13 -13   6  235.48   51.28
  13 -13   6  126.55   34.26
  13  13   6  187.98   41.92
  13 -13   7  198.15   43.44
  13  13   7  237.87   49.60
 -13 -13   7  182.32   45.44
 -13  13   7  177.62   43.79
  13  13   8  147.80   42.90
  13 -13   8  107.10   37.29
 -13 -13   8  128.60   43.11
 -13  13   8  118.48   38.14
 -13 -13   9  339.13   73.38
  13 -13   9  188.36   52.49
 -13  13   9  253.18   72.92
  13  13   9  292.02   72.06
 -13 -13  10   72.32   44.05
  13  13  10   37.19   36.42
 -13  13  10   41.12   30.93
 -13 -13  11  -35.45   38.01
 -13  13  11  -25.19   34.53
 -14   0   0 5919.10   75.95
 -14   0   0 6383.80  143.99
   0 -14   1 3683.32  100.52
 -14   0  -1 3370.16  105.53
 -14   0   1 3617.07  108.09
 -14   0   1 3639.76   81.83
   0  14   1 3654.09  100.51
  14   0   1 3785.56   62.13
 -14   0   2   -5.84    5.72
 -14   0  -2   14.72   11.05
  14   0   2    2.83    3.70
 -14   0   2   21.42   10.51
   0 -14   2   -2.51    8.82
 -14   0   3   44.43   20.15
   0  14   3   38.86   16.30
  14   0   3   29.72   11.08
 -14   0  -3   18.23   11.38
   0 -14   3   22.52   13.18
 -14   0   4  301.57   42.88
 -14   0  -4  340.19   39.89
   0  14   4  286.52   39.27
  14   0   4  293.68   34.83
   0 -14   4  286.06   36.92
  14   0   5   28.19   13.78
 -14   0  -5   47.59   17.95
   0  14   5   27.83   17.52
 -14   0   5    6.66   12.14
   0 -14   5   48.29   21.40
   0 -14   6  986.97   87.17
  14   0   6 1049.78   84.81
 -14   0  -6 1011.55   83.61
   0  14   6 1127.38   90.35
 -14   0   6 1098.13   93.64
   0  14   7   82.46   31.88
   0 -14   7   51.99   25.44
  14   0   7   73.84   32.07
 -14   0   7   96.03   33.17
 -14   0  -7   63.38   25.30
   0 -14   8   93.26   37.70
  14   0   8   28.02   20.86
   0  14   8   13.37   17.44
 -14   0   8   50.87   35.30
   0 -14   9  149.63   51.90
   0  14   9  187.95   56.49
  14   0   9  120.93   49.49
 -14   0   9   53.83   44.23
 -14   0  10  166.88   53.13
   0 -14  10  194.13   56.30
   0  14  10  198.09   58.18
  14   0  10  143.11   50.42
   0 -14  11  -23.53   30.91
 -14   0  11   31.89   35.20
   0  14  11   -1.85   23.15
 -14  -1   0   26.31   13.12
 -14  -1   0   20.12    6.91
 -14   1   0   34.44   16.11
 -14   1   0   17.81    5.59
   1  14   1 1417.48   64.21
 -14  -1   1 1459.40   51.49
 -14   1   1 1429.24   52.52
   1 -14   1 1439.08   63.99
 -14   1   1 1494.05   71.63
 -14  -1   1 1496.66   70.36
 -14   1  -1 1627.82   74.42
  -1 -14   1 1611.98   71.89
 -14  -1  -1 1501.54   69.73
  14  -1   1 1475.26   34.79
  14   1   1 1488.54   42.66
  -1  14   1 1346.88   63.10
 -14  -1   2   13.38   12.52
 -14   1  -2   31.89   14.06
   1 -14   2   12.94    7.05
 -14  -1   2   51.11   14.88
  14   1   2   24.73    7.60
  -1  14   2   33.33   11.81
 -14   1   2   40.84   15.76
 -14  -1  -2   15.95    9.30
  -1 -14   2   20.02   10.20
  14  -1   2   24.12    6.85
 -14   1   2   39.10   15.24
 -14   1   3  144.69   38.81
 -14  -1   3  140.01   33.90
   1 -14   3   24.45   11.60
  14  -1   3   38.31   13.04
 -14   1  -3   64.20   26.29
  14   1   3   45.51   14.66
   1  14   3   21.84   17.42
  -1  14   3   53.24   21.40
  -1 -14   3   38.28   20.28
 -14  -1  -3   47.11   22.60
  14  -1   4  149.31   24.99
   1 -14   4  148.99   28.39
 -14   1   4  134.18   32.04
 -14  -1   4  162.38   29.19
  14   1   4  167.43   26.87
   1  14   4  154.53   30.25
  -1  14   4  156.06   30.88
  -1 -14   4  161.35   29.54
 -14   1  -4  128.48   26.42
 -14   1  -5    7.36   14.44
 -14   1   5   18.95   21.93
   1  14   5   -4.48   13.39
 -14  -1   5  -10.94   17.32
  14  -1   5   -3.96   13.06
   1 -14   5   14.60   11.46
  -1 -14   5   17.24   14.35
  -1  14   5   -7.82   10.17
  14   1   5   16.83   12.08
  -1  14   6  288.41   58.53
 -14   1   6  368.48   60.32
  -1 -14   6  370.03   56.74
 -14  -1   6  331.43   56.94
   1  14   6  445.74   65.39
 -14   1  -6  380.67   50.86
  14   1   6  307.96   54.04
   1 -14   6  318.49   58.04
  14  -1   6  303.25   49.06
  14   1   7   52.10   30.61
   1 -14   7   75.16   33.56
 -14  -1  -7   72.28   30.55
 -14   1   7   24.89   20.12
 -14  -1   7   89.23   41.07
  14  -1   7  106.26   36.10
  -1 -14   7  106.57   38.12
   1  14   7   43.70   24.65
  -1  14   7   96.11   39.21
   1  14   8   36.52   25.22
 -14   1   8   40.84   30.61
   1 -14   8    7.32   33.87
  -1 -14   8   63.55   28.67
 -14  -1   8  -22.33   21.72
  14  -1   8   52.64   31.20
  14   1   8    4.43   23.27
  -1  14   8   20.40   29.60
 -14   1   9   86.84   44.61
 -14  -1   9  144.34   57.04
   1 -14   9  113.95   48.92
  -1 -14   9  142.04   48.79
  14  -1   9  150.03   45.92
  -1  14   9   75.27   40.27
  14   1   9  117.75   48.30
   1  14   9  145.57   58.43
 -14  -1  10   39.53   35.54
 -14   1  10  106.80   51.27
  14  -1  10  112.02   43.76
  -1 -14  10   32.69   32.86
   1 -14  10   32.48   32.91
  14   1  10   80.95   49.58
   1  14  10   68.84   50.16
  -1  14  10   46.75   37.60
   1  14  11   40.40   35.94
  -1 -14  11   24.38   34.99
 -14  -1  11    2.22   24.15
 -14   1  11   14.87   24.97
  -1  14  11  -51.79   38.08
   1 -14  11   -9.42   35.48
 -14  -2   0 4038.19  113.37
  -2  14   0 3975.40   96.17
   2  14   0 3936.86  100.52
 -14   2   0 4069.31  118.42
 -14   2   0 3884.99   56.96
 -14  -2   0 3806.09   71.92
 -14  -2   1 2799.14   94.31
   2 -14   1 2680.72   83.19
  -2 -14   1 2726.99   87.83
 -14   2   1 2727.22   74.09
 -14  -2  -1 2652.96   92.98
 -14   2   1 2807.74   98.48
   2  14   1 2800.54   89.71
 -14  -2   1 2683.98   71.09
  -2  14   1 2831.02   86.32
  14   2   1 2854.69   63.28
  14  -2   1 2810.58   40.88
   2  14   2   47.03   13.88
  14   2   2   18.66    6.73
 -14  -2   2   23.50   11.46
 -14   2   2   17.78   12.19
 -14   2  -2    5.77    9.37
  -2  14   2    9.01    7.60
  -2 -14   2    6.31    7.81
   2 -14   2    9.18    7.13
 -14  -2   2   16.11   11.24
  14  -2   2    8.54    3.84
 -14  -2  -2   33.42   14.01
 -14   2   3   61.17   21.99
  -2  14   3   52.62   18.63
  -2 -14   3   22.06   13.10
 -14  -2   3   48.09   17.61
  14   2   3   38.11   13.28
 -14   2  -3   33.89   15.54
   2  14   3   18.54   12.96
  14  -2   3   27.32    9.96
   2 -14   3   11.70    6.76
  -2 -14   4  316.82   39.85
 -14  -2   4  323.02   43.96
   2 -14   4  346.50   42.92
  14   2   4  356.63   37.63
 -14   2   4  303.09   44.42
 -14   2  -4  377.33   40.37
  14  -2   4  331.87   36.59
  -2  14   4  333.61   43.33
   2  14   4  294.16   39.30
  14  -2   5  106.91   25.60
 -14   2  -5  131.34   25.90
   2 -14   5  109.93   25.18
 -14   2   5  112.18   31.03
  -2  14   5  142.21   31.21
  -2 -14   5  133.69   28.72
 -14  -2   5  123.57   31.28
   2  14   5  115.02   25.51
  14   2   5  104.66   23.33
 -14   2   6  878.17   83.59
  -2 -14   6  958.37   82.01
   2  14   6  916.65   83.31
  14   2   6  963.85   82.47
 -14  -2   6  919.81   87.11
   2 -14   6  959.80   84.91
  14  -2   6  926.17   78.52
 -14   2  -6  820.64   68.48
  -2  14   6  907.27   83.26
  -2 -14   7    9.15   16.60
 -14   2   7   82.15   34.98
  14  -2   7   50.28   29.45
   2  14   7   14.45   26.96
   2 -14   7   61.87   29.60
  -2  14   7   76.16   31.02
 -14  -2   7   69.78   29.76
  14   2   7   43.90   22.71
  14   2   8  -25.17   25.41
  -2 -14   8   46.19   30.48
 -14  -2   8  -14.76   23.45
  -2  14   8   36.61   29.01
  14  -2   8   34.44   25.43
 -14   2   8   66.22   31.08
   2  14   8   -0.81   19.14
   2 -14   8   54.06   23.95
 -14  -2   9   99.50   45.87
  -2 -14   9  156.67   53.96
   2 -14   9  143.55   50.93
  14  -2   9   82.52   42.65
   2  14   9  144.11   48.42
  -2  14   9   33.11   33.56
 -14   2   9   56.35   36.72
  14   2   9   73.04   37.14
   2  14  10  177.57   54.54
 -14  -2  10   95.63   47.87
  14   2  10   38.33   33.36
 -14   2  10  135.55   50.84
   2 -14  10   57.83   44.25
  -2  14  10  131.52   48.78
  -2 -14  10  147.60   52.91
  14  -2  10  136.46   53.13
 -14   2  11  -27.82   30.50
  -2 -14  11  -10.79   26.41
   2  14  11  -54.66   44.47
   2 -14  11    7.58   24.85
  -2  14  11   36.31   36.94
 -14  -2  11  -18.55   35.72
   3  14   0   69.62   26.52
 -14  -3   0    9.42    5.45
 -14   3   0   16.83   12.37
  -3  14   0   79.91   20.70
 -14  -3   0    4.63   10.46
 -14  -3  -1  921.82   54.56
   3  14   1  915.70   52.10
  -3  14   1  930.15   50.57
  -3 -14   1 1015.17   54.67
 -14  -3   1  910.60   55.38
 -14  -3   1  943.70   43.85
 -14   3   1  881.13   43.53
 -14   3  -1  945.03   57.69
   3 -14   1  940.57   49.90
  14   3   1  900.49   38.61
 -14   3   1  971.61   60.66
 -14   3  -2   50.84   15.73
  14  -3   2   76.21   10.80
 -14  -3   2   68.09   18.29
   3 -14   2   43.07   14.50
  -3  14   2   44.70   13.00
 -14   3   2   77.25   22.07
  -3 -14   2   58.03   15.31
  14   3   2   69.50   13.60
 -14  -3   2   85.19   18.58
   3  14   2   25.95   10.15
   3 -14   3   46.17   18.00
 -14   3  -3   77.09   24.65
  14  -3   3   46.27   13.96
  -3  14   3   46.41   15.56
 -14   3   3   95.96   33.53
   3  14   3   61.67   18.86
  14   3   3   46.56   13.63
 -14  -3   3   88.09   24.52
 -14  -3   3   62.91   18.98
  -3 -14   3   59.26   19.65
  14  -3   4  116.76   21.97
  -3  14   4  148.03   30.35
 -14   3   4  121.70   31.46
  14   3   4  134.42   25.08
  -3 -14   4  124.41   28.29
 -14  -3   4  140.61   30.34
 -14   3  -4  125.31   24.48
   3  14   4  129.57   27.49
   3 -14   4   99.62   25.63
  14  -3   5   24.09   15.45
  -3  14   5   15.12   18.05
 -14   3  -5   21.57   15.87
 -14  -3   5   17.36   22.20
   3 -14   5   19.89   17.10
  -3 -14   5   15.39   12.58
  14   3   5   14.37   15.24
 -14   3   5   20.38   18.42
   3  14   5   -0.41   12.18
  14  -3   6  237.47   43.25
 -14   3  -6  318.45   42.18
 -14  -3   6  267.53   50.51
  -3  14   6  281.08   51.30
   3  14   6  257.51   54.34
   3 -14   6  308.65   51.46
  14   3   6  223.94   46.38
 -14   3   6  258.34   50.42
  -3 -14   6  262.46   50.18
   3  14   7   54.96   29.82
  14   3   7   72.63   28.24
  -3  14   7   52.17   31.99
  14  -3   7   46.94   26.02
 -14  -3   7  114.72   38.35
  -3 -14   7   66.84   36.77
 -14   3   7   79.93   36.75
   3 -14   7   87.93   35.82
   3 -14   8   55.95   34.77
  -3  14   8   21.09   29.38
  -3 -14   8   53.47   31.87
 -14  -3   8   41.23   26.96
 -14   3   8   26.83   26.12
   3  14   8   26.15   28.74
  14   3   8   21.60   22.84
  14  -3   8   38.93   25.79
  -3 -14   9   98.09   48.98
 -14   3   9   98.05   40.88
 -14  -3   9   29.72   32.49
  -3  14   9   71.35   31.83
   3 -14   9   87.29   40.98
  14   3   9   76.05   33.16
   3  14   9   61.90   37.61
  14  -3   9  -15.85   21.91
  14   3  10   -4.66   23.62
 -14   3  10  -29.59   19.00
 -14  -3  10   18.98   31.15
   3 -14  10  100.78   43.36
  -3 -14  10   69.58   40.45
   3  14  10   18.84   23.76
  -3  14  10   -1.13   28.40
  14  -3  10   15.85   32.56
 -14   3  11  -26.72   25.00
  -3 -14  11   -5.58   24.23
 -14  -3  11   46.99   33.77
   3 -14  11   45.68   42.18
   3  14  11   -1.55   30.29
  -3  14  11  -14.44   25.85
  -4  14   0 1897.28   64.70
 -14  -4   0 1821.64   77.02
   4  14   0 1860.03   72.34
 -14   4   0 1994.38   84.72
 -14  -4   0 1870.14   57.91
  -4  14   1 1035.42   50.93
   4 -14   1  977.64   47.86
  -4 -14   1 1004.95   53.22
 -14  -4   1 1042.80   47.18
 -14  -4  -1  924.43   55.53
   4  14   1 1071.68   55.14
 -14   4   1 1045.68   45.35
  14   4   1 1055.16   43.04
 -14   4  -1 1008.05   60.04
 -14  -4   1  992.30   57.12
   4 -14   2   26.98   12.39
  -4  14   2   34.83   12.77
 -14   4   2   43.26   13.75
 -14  -4   2   37.90   12.90
 -14   4  -2   19.70   13.26
 -14  -4   2   15.39    8.22
  14   4   2   39.63   10.59
  -4 -14   2   29.34   10.36
  14  -4   2   29.91    6.35
 -14  -4   3    6.54    8.86
  14   4   3   18.69   10.95
 -14  -4   3   27.22   13.67
 -14   4   3   14.95   12.36
  -4  14   3   21.59    7.79
   4 -14   3   17.11   10.71
  -4 -14   3   17.06   12.18
  14  -4   3   20.11    9.12
   4  14   3   14.21   11.51
 -14   4  -3   20.50   13.42
   4 -14   4  180.46   32.01
  14  -4   4  161.02   25.31
 -14   4  -4  172.07   26.98
  14   4   4  185.45   31.04
 -14   4   4  159.88   36.94
   4  14   4  169.70   30.56
  -4 -14   4  182.90   32.12
  -4  14   4  201.10   34.60
 -14  -4   4  183.83   34.55
 -14   4  -5  108.95   24.47
 -14   4   5   74.97   27.63
  14  -4   5  109.30   24.82
 -14  -4   5  128.76   31.61
   4 -14   5   88.41   23.66
  14   4   5  109.36   28.57
  -4 -14   5  139.64   30.08
  -4  14   5   64.06   24.46
   4  14   5   73.47   22.15
   4  14   6  439.80   59.73
   4 -14   6  497.99   61.47
  -4  14   6  490.84   62.09
  14  -4   6  461.64   56.69
 -14  -4   6  431.56   62.13
 -14   4  -6  405.67   45.11
  14   4   6  450.58   56.31
 -14   4   6  494.21   65.92
  -4 -14   6  526.76   61.08
 -14   4   7   19.57   15.32
  -4 -14   7   14.48   20.19
   4  14   7   61.95   32.52
 -14  -4   7   40.78   27.77
   4 -14   7   83.42   33.60
  -4  14   7   39.97   24.67
  14   4   7   37.22   27.60
  14  -4   7   55.60   22.33
   4  14   8   -1.63   24.10
 -14  -4   8   35.04   30.92
   4 -14   8   50.03   34.37
  14  -4   8   15.32   19.71
  -4 -14   8  -36.02   27.22
  -4  14   8    7.10   24.83
  14   4   8    7.77   16.86
 -14   4   8   -4.42   16.86
 -14  -4   9   26.46   28.25
  14  -4   9    2.48   17.62
  -4 -14   9   -2.10   23.78
  -4  14   9   50.70   33.89
 -14   4   9   25.60   25.02
  14   4   9   28.64   29.38
   4 -14   9    9.47   26.37
   4  14   9  -22.67   27.24
   4 -14  10   35.51   34.43
 -14  -4  10   20.06   29.19
  -4 -14  10   17.46   27.93
  14   4  10   15.02   33.99
 -14   4  10   44.49   33.75
   4  14  10    8.53   25.00
  -4  14  10   -2.34   22.72
  14  -4  10   29.86   27.19
   4  14  11    1.40   27.03
 -14  -4  11  -16.70   24.57
  -4 -14  11    2.35   26.40
 -14   4  11   -5.65   22.70
  -4  14  11   39.54   32.20
 -14   5   0   13.61   11.45
   5  14   0   21.53   14.92
 -14  -5   0   -0.02    6.60
  -5  14   0   26.28   12.34
 -14  -5   0    6.40    5.62
  -5  14   1  197.64   23.55
   5 -14   1  180.57   20.71
  -5 -14   1  227.19   27.56
 -14  -5   1  199.89   21.08
 -14   5   1  213.65   19.37
 -14  -5   1  215.10   28.46
   5  14   1  220.45   26.95
  14   5   1  198.57   20.28
 -14   5  -1  196.79   29.31
 -14   5  -2  101.38   25.96
 -14  -5   2  116.94   24.12
 -14  -5   2  150.33   24.14
   5 -14   2   99.64   19.85
 -14   5   2  115.59   22.47
  -5 -14   2  107.90   21.66
   5  14   2   93.70   22.30
  14  -5   2   90.46   11.04
  -5  14   2  106.17   20.65
  14   5   2   87.90   15.89
  14  -5   3   46.97   13.39
  -5  14   3   42.41   17.18
 -14   5   3   36.00   18.39
  -5 -14   3   72.07   18.44
 -14  -5   3   42.35   15.18
  14   5   3   30.07   11.25
 -14  -5   3   67.88   21.42
 -14   5  -3   48.16   19.64
   5 -14   3   56.23   15.27
   5  14   3   38.74   15.83
  -5 -14   4  115.33   28.00
  14  -5   4   85.02   19.03
 -14   5   4   96.92   29.56
   5 -14   4   97.24   23.03
  14   5   4  100.09   22.83
 -14  -5   4  112.88   25.30
 -14   5  -4   86.36   21.02
  -5  14   4  117.64   26.48
  -5 -14   4   80.24   10.20
   5  14   4  119.67   27.01
   5  14   5   32.53   20.83
  14   5   5   45.85   20.90
  14  -5   5   12.13   12.49
 -14   5   5   -8.47   18.69
   5 -14   5   17.58   20.30
  -5  14   5   23.21   18.73
 -14  -5   5   10.00   22.44
  -5 -14   5   15.70   18.76
 -14   5  -5   17.94   12.03
   5 -14   6  113.78   31.93
 -14   5   6  112.09   35.60
  -5 -14   6  114.43   33.53
  14  -5   6   85.06   27.16
   5  14   6  122.22   35.26
  14   5   6  149.45   35.21
  -5  14   6  110.15   37.93
 -14  -5   6   70.27   32.59
 -14   5  -6  120.95   24.15
  14  -5   7   44.48   23.95
 -14   5   7   12.69   18.00
   5 -14   7   38.86   25.18
 -14  -5   7   46.33   31.32
   5  14   7   28.03   21.18
  14   5   7   18.88   21.41
  -5  14   7   33.00   21.10
  -5 -14   7   18.58   23.63
  14  -5   8   17.06   25.68
   5  14   8    4.92   28.86
   5 -14   8   44.02   30.64
  -5 -14   8   27.13   26.98
  -5  14   8    1.89   22.28
  14   5   8   40.48   23.55
 -14   5   8   53.07   39.75
 -14  -5   8   39.32   30.90
   5  14   9  -27.84   31.24
  -5 -14   9  -27.76   20.97
 -14   5   9   16.85   28.41
 -14  -5   9   40.39   30.86
   5 -14   9   32.34   20.30
  14  -5   9   49.88   29.30
  14   5   9    4.54   23.94
  -5  14   9   14.57   25.35
 -14   5  10   28.48   28.79
   5 -14  10   54.24   39.69
  14   5  10   10.19   28.60
 -14  -5  10   -7.51   23.89
  -5 -14  10  -20.15   25.91
  -5  14  10  -27.42   23.07
   5  14  10   88.53   43.42
  14  -5  10   14.64   29.71
   5  14  11   -0.82   25.58
 -14  -5  11  -38.29   30.08
  -5 -14  11  -17.41   37.15
  -5  14  11    0.08   34.44
 -14   5  11   30.46   26.19
   6  14   0  408.88   34.83
  -6  14   0  444.20   31.49
  14   6   0  452.27   31.16
 -14  -6   0  429.66   31.18
 -14  -6   0  416.71   37.56
 -14   6  -1  145.34   25.31
  -6 -14   1  213.82   25.56
  14   6   1  176.17   20.16
 -14  -6   1  164.76   24.02
 -14  -6   1  173.78   20.12
  -6  14   1  174.99   22.22
   6 -14   1  146.05   18.43
 -14   6   1  173.22   16.88
   6  14   1  185.91   25.76
   6  14   2  112.15   23.22
   6 -14   2  104.84   17.53
  14   6   2   98.97   17.78
  -6  14   2   97.41   19.99
 -14   6  -2   87.72   22.21
 -14   6   2  119.78   21.47
  -6 -14   2  107.31   22.61
 -14  -6   2  121.57   21.86
  14  -6   2  101.43   11.78
 -14  -6   2  104.25   22.34
 -14  -6   3   17.89   11.93
  -6  14   3   12.55   13.31
 -14   6  -3   -1.72    7.81
   6 -14   3    1.33    6.34
  -6 -14   3   16.22   11.09
   6  14   3   11.24   10.33
 -14   6   3    7.48   13.97
  14  -6   3   10.69    5.44
 -14  -6   3   14.06    9.19
  14   6   3   11.39    9.70
  -6 -14   4  140.19   27.65
 -14  -6   4  139.78   27.68
 -14   6  -4  112.60   22.89
   6 -14   4  124.33   24.15
   6  14   4  139.87   29.37
  -6 -14   4  119.95   13.38
  14  -6   4  102.15   20.66
  -6  14   4  111.11   27.56
 -14   6   4   97.43   25.79
  14   6   4  127.00   25.18
  14  -6   5  148.16   29.46
 -14   6   5  174.96   40.88
   6  14   5  201.05   35.56
  -6  14   5  162.50   35.13
  -6 -14   5  233.35   37.80
 -14  -6   5  171.68   36.27
  14   6   5  187.62   34.04
 -14   6  -5  160.09   26.97
   6 -14   5  183.73   35.11
  14  -6   6  165.78   35.54
 -14   6   6  198.34   41.80
 -14   6  -6  142.20   24.73
   6  14   6  124.88   31.96
  -6  14   6  141.44   34.62
  14   6   6  162.73   36.31
   6 -14   6  175.97   37.98
 -14  -6   6  209.27   39.06
  -6 -14   6  161.53   35.97
   6 -14   7    2.07   16.18
  -6 -14   7  -35.19   20.26
 -14   6   7    5.22   14.64
  14  -6   7   29.70   23.49
  14   6   7  -29.00   25.55
 -14  -6   7   12.46   23.45
  -6  14   7   20.96   15.97
   6  14   7   20.45   21.58
 -14  -6   8   -2.21   16.28
  -6  14   8  -16.06   19.65
  14   6   8   42.32   30.01
  14  -6   8   -7.90   15.62
  -6 -14   8   13.61   21.91
   6 -14   8   50.40   31.06
 -14   6   8   -2.21   26.46
   6  14   8   -7.58   16.99
  -6 -14   9  -43.95   28.09
  14   6   9   15.17   26.04
 -14  -6   9    5.15   19.73
  -6  14   9   -6.71   24.15
 -14   6   9    4.72   28.95
  14  -6   9   59.79   34.70
   6 -14   9  -12.77   20.11
   6  14   9  -19.66   24.64
 -14   6  10   17.64   24.48
  -6 -14  10   15.64   32.46
  -6  14  10  -18.09   24.61
   6 -14  10   37.27   35.41
  14   6  10    0.80   25.87
 -14  -6  10    3.26   20.40
   6  14  10   57.96   38.27
  14  -6  10   41.88   31.58
   6  14  11   -7.10   26.59
 -14  -6  11   51.77   40.53
  -6  14  11   62.76   42.17
  -6 -14  11    6.63   26.13
 -14   6  11  -45.46   35.36
  -7  14   0  103.20   18.56
  14   7   0   50.73   14.05
   7  14   0   94.11   21.04
   7 -14   1  245.36   24.20
  -7 -14   1  290.24   33.28
 -14  -7   1  220.55   29.11
  14   7   1  253.01   25.35
   7  14   1  227.87   28.10
 -14   7  -1  230.34   32.10
 -14  -7   1  243.43   25.79
 -14   7   1  238.50   19.43
  -7  14   1  236.12   24.96
  14   7   2  103.22   18.41
 -14   7  -2  109.04   26.16
 -14  -7   2  162.76   25.28
  -7 -14   2  145.05   23.70
   7 -14   2  129.64   19.56
 -14   7   2  155.42   23.04
  14  -7   2  117.37   12.98
 -14  -7   2  115.05   23.14
  -7  14   2  120.87   21.17
   7  14   2  140.24   23.88
 -14  -7   3   62.76   15.89
 -14   7   3   63.13   18.53
 -14   7  -3   50.61   17.57
  -7  14   3   50.00   15.94
  14   7   3   46.46   14.50
  14  -7   3   49.08   13.66
   7  14   3   44.60   15.24
   7 -14   3   57.53   14.33
 -14  -7   3   53.14   13.76
  -7 -14   3   64.54   17.21
  -7 -14   4  122.27   26.80
 -14  -7   4  131.48   29.80
 -14   7  -4   86.05   21.03
 -14  -7   4   87.40   19.13
  -7  14   4  102.81   28.63
   7 -14   4  128.30   26.45
  14   7   4  127.86   25.87
 -14   7   4  118.78   28.45
   7  14   4  117.94   26.77
  -7 -14   4   98.01   13.28
  14  -7   4  102.60   23.03
 -14   7   5   41.70   23.14
 -14   7  -5   19.47   13.42
  -7 -14   5   37.51   22.27
  14   7   5   45.61   22.42
  -7  14   5   34.85   21.74
 -14  -7   5   40.13   23.35
  14  -7   5   41.62   19.73
   7  14   5   32.83   21.95
   7 -14   5   20.15   15.42
  14   7   6   65.33   29.07
  14  -7   6   47.78   18.58
 -14   7   6   62.54   29.06
   7 -14   6   83.54   30.47
 -14  -7   6   81.26   29.61
  -7 -14   6   76.42   25.80
   7  14   6   57.56   24.49
  -7  14   6   40.15   24.90
   7 -14   7   42.70   24.24
   7  14   7   48.34   24.21
 -14   7   7   53.56   29.78
  14   7   7    5.44   13.92
 -14  -7   7   34.77   30.27
  14  -7   7  -15.16   16.48
  -7 -14   7  -21.53   24.55
  -7  14   7   21.05   21.81
 -14   7   8   30.18   29.41
  14  -7   8   22.68   23.05
   7 -14   8   36.02   30.80
 -14  -7   8  -21.98   22.36
  14   7   8  -13.43   23.21
  -7 -14   8  -10.06   28.41
   7  14   8   32.68   29.09
  -7  14   8   26.67   27.67
 -14   7   9    3.26   21.51
  14   7   9   22.96   28.46
 -14  -7   9   30.20   24.98
  14  -7   9   16.76   23.01
  -7 -14   9  -37.23   18.63
   7 -14   9   13.68   29.73
   7  14   9   26.07   40.03
  -7  14   9   17.71   23.07
   7 -14  10   46.19   35.67
 -14  -7  10   31.70   30.97
  -7 -14  10  -16.60   22.47
   7  14  10  -10.31   21.41
  14   7  10   -2.01   22.49
 -14   7  10    6.50   24.60
  -7  14  10   83.20   45.47
  14  -7  10   46.89   34.62
  -7 -14  11   76.23   47.17
 -14  -7  11    0.08   26.93
   7  14  11   28.43   31.39
  -7  14  11   45.51   35.10
 -14   7  11  -32.83   38.26
   8  14   0 3169.68   96.41
  -8  14   0 3207.05   81.15
 -14   8   0 3070.56   40.05
  14   8   0 3268.63   90.56
   8  14   1  177.07   26.33
 -14  -8   1  165.99   25.83
  -8 -14   1  172.49   21.68
  -8  14   1  185.59   22.63
  14   8   1  181.81   22.97
 -14  -8   1  182.37   23.35
 -14   8   1  179.34   16.47
   8 -14   1  171.22   19.52
 -14   8  -2   69.63   18.83
  14   8   2   72.41   16.05
  -8  14   2   77.14   17.16
  14  -8   2   64.61   10.89
   8  14   2   79.37   19.34
 -14  -8   2   59.98   18.87
   8 -14   2   84.20   15.78
 -14   8   2   80.51   15.84
 -14  -8   2   67.92   16.94
 -14  -8   3   15.83    9.42
   8 -14   3    9.80    6.79
  14  -8   3   12.84    9.10
 -14  -8   3   -4.29    8.00
  14   8   3    6.22    6.18
 -14   8   3   17.10    9.79
  -8 -14   3    5.94   10.34
   8  14   3    2.49    8.23
  -8  14   3    9.30    8.22
 -14   8  -3   15.25   11.67
 -14   8   4  148.50   30.77
 -14   8  -4  142.01   25.37
 -14  -8   4  147.69   24.27
  -8  14   4  180.78   33.96
  -8 -14   4  181.78   32.45
  -8 -14   4  165.89   18.19
   8  14   4  149.90   30.68
  14   8   4  155.92   29.02
  14  -8   4  145.30   26.08
   8 -14   4  170.40   30.53
 -14  -8   4  168.99   33.39
   8 -14   5  230.85   39.31
   8  14   5  200.16   38.71
  14  -8   5  220.17   35.67
 -14   8  -5  204.56   29.10
 -14  -8   5  210.84   38.21
  14   8   5  210.53   36.63
  -8  14   5  221.71   41.33
  -8 -14   5  231.71   39.13
 -14   8   5  222.86   41.14
   8 -14   6  129.51   34.90
  14  -8   6  149.70   35.88
   8  14   6  127.26   30.51
  -8 -14   6  120.86   33.02
 -14  -8   6  111.65   31.68
  14   8   6  159.44   35.01
  -8  14   6  155.66   39.55
 -14   8   6  144.19   38.38
 -14   8   7   25.58   23.21
 -14  -8   7   96.10   34.92
  -8  14   7   49.45   27.82
   8  14   7   59.57   28.44
  14   8   7   44.89   31.15
   8 -14   7   63.61   33.03
  14  -8   7   14.01   15.47
  -8 -14   7    8.09   18.53
   8 -14   8   74.00   36.22
  -8  14   8   -8.23   20.86
 -14  -8   8   44.08   30.93
  14   8   8   12.57   25.04
  -8 -14   8   25.94   29.56
 -14   8   8   -6.61   23.49
   8  14   8   -1.05   26.63
  14  -8   8    9.18   16.64
  14  -8   9   58.83   33.38
  14   8   9   45.61   34.25
  -8 -14   9   11.07   19.37
 -14   8   9  -10.04   22.81
 -14  -8   9   39.98   36.97
   8 -14   9    9.72   26.33
  -8  14   9   57.01   38.62
   8  14   9   23.94   33.11
  -8  14  10   77.49   32.91
   8 -14  10   60.85   40.60
   8  14  10   63.38   42.67
 -14  -8  10  -16.78   27.06
  -8 -14  10   45.76   39.64
  14   8  10   48.04   34.65
 -14   8  10    6.25   21.61
 -14  -8  11  -41.61   36.78
 -14   8  11   10.30   23.54
  -8 -14  11   17.01   31.98
   8  14  11  -14.94   25.47
  -9  14   0   83.19   19.72
   9  14   0   87.98   24.43
  14   9   0   43.37   19.44
 -14   9   0   24.71    8.20
 -14   9   1  161.46   16.04
 -14  -9   1  187.11   26.50
 -14  -9   1  171.15   22.60
   9  14   1  183.28   26.90
  -9  14   1  171.89   21.85
   9 -14   1  155.68   20.07
  14   9   1  157.47   21.34
 -14   9   2  182.25   22.75
   9 -14   2  186.02   21.69
  14   9   2  137.20   21.20
 -14  -9   2  152.93   25.14
   9  14   2  162.66   26.30
 -14  -9   2  194.68   28.40
  -9 -14   2  252.08   32.74
  -9  14   2  151.02   22.98
  14  -9   2  153.74   16.60
  -9 -14   3  130.42   25.94
  -9  14   3  104.55   20.89
  14   9   3  107.85   21.74
   9 -14   3  127.89   20.92
 -14   9   3  131.47   26.78
 -14   9  -3  124.70   24.02
 -14  -9   3  153.50   28.47
   9  14   3  111.77   24.19
 -14  -9   3  128.93   23.63
  14  -9   3  112.09   20.21
 -14   9   4  201.15   38.43
 -14  -9   4  167.82   25.23
  -9  14   4  215.89   36.84
  14  -9   4  186.43   30.15
   9  14   4  205.16   36.33
 -14   9  -4  172.25   28.18
   9 -14   4  211.46   33.50
 -14  -9   4  207.10   34.76
  -9 -14   4  181.14   19.89
  14   9   4  167.46   29.31
  -9 -14   4  228.89   38.20
  14   9   5   61.18   29.34
 -14   9  -5   17.96   11.43
 -14  -9   5   54.88   25.37
  14  -9   5   28.21   21.09
 -14   9   5   11.19   17.63
   9  14   5   20.46   19.58
  -9 -14   5   48.88   26.26
   9 -14   5   33.03   20.92
  -9  14   5   83.49   30.31
 -14   9   6  138.92   41.77
  -9 -14   6  117.69   38.06
   9  14   6  112.92   32.53
   9 -14   6  124.49   35.68
  -9  14   6  142.39   43.22
  14   9   6  187.76   41.55
 -14  -9   6  135.89   39.07
  14  -9   6  121.59   30.96
  14  -9   7   -2.92   15.03
 -14  -9   7   33.01   32.79
  -9 -14   7   31.29   25.63
   9  14   7   27.91   20.37
   9 -14   7   23.11   25.63
  14   9   7   49.36   28.05
  -9  14   7    7.37   20.26
 -14   9   7   26.35   23.45
  14  -9   8    4.08   16.25
 -14   9   8  -30.71   29.13
  -9 -14   8   45.12   33.84
 -14  -9   8   19.11   29.98
  14   9   8   29.96   29.58
  -9  14   8  -13.16   19.57
   9  14   8  -23.91   18.61
   9 -14   8   33.55   31.09
  14   9   9   66.37   42.30
   9 -14   9   87.99   42.74
  -9 -14   9   87.99   41.12
   9  14   9  129.99   46.47
 -14  -9   9   81.60   42.83
  14  -9   9  120.86   42.86
  -9  14   9   83.00   46.84
 -14   9   9   34.30   25.37
  -9  14  10   45.84   27.82
 -14  -9  10   18.37   19.85
 -14   9  10   40.94   29.84
   9  14  10   41.44   33.49
   9 -14  10   32.30   33.26
  -9 -14  10   13.38   33.05
  14   9  10   67.19   44.10
   9  14  11    0.08   26.87
  -9 -14  11   65.42   44.83
 -14   9  11    0.77   25.07
 -14  -9  11   49.73   38.59
  -9  14  11   77.24   49.40
  10  14   0 3196.85   98.72
  14  10   0 3212.23   96.74
 -10  14   0 3304.96   79.48
 -14  10   0 3227.07   53.40
  14 -10   1  258.69   13.93
  10 -14   1  262.92   23.47
 -10  14   1  287.60   26.64
  10  14   1  278.86   32.88
 -14 -10   1  314.18   30.47
  14  10   1  289.47   29.57
 -14  10   1  289.74   21.27
 -14 -10   2    3.15    7.32
 -14 -10   2   18.38   11.86
  14  10   2    7.57    8.93
 -14  10   2   13.27    7.72
 -10  14   2   22.69   12.13
  10 -14   2    9.32    6.69
  14 -10   2   12.09    5.28
  10  14   2   25.00   14.67
 -10 -14   2   42.11   17.37
 -14 -10   3  103.18   20.23
 -10 -14   3  100.58   16.86
 -14 -10   3  110.06   26.38
 -10  14   3   94.05   21.78
 -14  10   3   90.14   21.14
 -10 -14   3   65.03   19.86
  10 -14   3   73.06   18.52
  14 -10   3   78.94   16.55
  10  14   3   72.82   18.88
  14  10   3   76.75   20.07
 -10 -14   4  335.61   44.58
  10 -14   4  271.33   38.68
 -14 -10   4  326.92   43.44
 -10 -14   4  318.06   27.94
  14  10   4  270.53   39.46
 -10  14   4  322.12   41.82
  10  14   4  269.31   37.45
 -14 -10   4  303.22   32.16
 -14  10   4  282.71   42.93
  14 -10   4  281.59   36.41
 -14  10   5  239.52   44.98
  14 -10   5  280.63   40.46
 -14 -10   5  271.37   45.70
  10  14   5  268.76   41.98
 -10 -14   5  318.33   46.37
 -10  14   5  272.08   44.84
  14  10   5  296.63   44.14
  10 -14   5  322.68   45.24
  10 -14   6  617.73   71.04
  14  10   6  604.12   71.63
 -10 -14   6  603.44   66.14
 -14  10   6  562.95   71.24
  10  14   6  590.25   66.38
 -10  14   6  635.57   75.33
  14 -10   6  552.92   61.69
 -14 -10   6  423.59   58.78
 -14  10   7   -8.94   22.33
 -14 -10   7   35.47   24.50
  10 -14   7   13.78   23.85
  14 -10   7   -7.94   18.56
  14  10   7   10.84   20.16
 -10 -14   7   54.37   31.24
  10  14   7   13.49   18.27
 -10  14   7   26.34   29.57
 -14  10   8   33.03   22.57
  14 -10   8   28.41   26.51
 -10  14   8   26.53   22.41
  10 -14   8  -12.98   17.53
 -10 -14   8   27.18   19.37
  14  10   8  -19.63   25.91
  10  14   8   22.19   25.30
 -14 -10   8    1.49   18.54
  10 -14   9  153.39   53.75
  14  10   9  171.40   54.64
 -10 -14   9  103.67   46.70
 -14 -10   9  195.87   54.57
 -14  10   9  107.21   47.32
  10  14   9   80.26   46.86
 -10  14   9   98.59   43.85
  14 -10   9   68.72   35.07
 -14  10  10   33.77   34.14
 -10  14  10    1.25   31.83
 -14 -10  10   26.53   36.63
  10  14  10   23.35   24.32
  10 -14  10   22.31   23.13
 -10 -14  10   39.86   34.92
  14  10  10   20.86   30.23
 -10 -14  11   35.76   40.03
 -10  14  11  -10.77   27.93
  10  14  11  -29.25   37.34
 -14 -10  11   58.13   43.57
 -14  10  11    0.08   24.80
 -11  14   0   68.71   18.62
  14  11   0   92.69   29.71
  11  14   0  141.60   34.82
 -14  11   0   87.82   15.33
 -14  11   1   98.55   13.18
 -11 -14   1   85.65   16.99
  14 -11   1   86.71    9.37
 -11  14   1  101.16   17.33
  14  11   1   91.04   19.05
 -14 -11   1  110.11   20.74
  11 -14   1   92.19   13.17
  11  14   1   86.87   19.60
  14  11   2  217.29   27.40
  14 -11   2  209.96   20.45
 -11 -14   2  219.72   27.84
  11 -14   2  218.90   23.37
 -11  14   2  241.87   27.33
 -14  11   2  267.69   28.17
 -14 -11   2  222.92   29.34
 -14 -11   2  250.03   32.79
  11  14   2  221.03   31.88
  14  11   3  206.11   30.84
  11  14   3  187.38   33.66
  11 -14   3  195.52   26.79
 -11 -14   3  241.69   40.92
 -11  14   3  214.20   30.73
 -14  11   3  299.38   42.72
  14 -11   3  197.05   26.85
 -14 -11   3  320.23   45.21
 -14 -11   3  300.90   36.10
 -11 -14   3  259.89   29.59
  14 -11   4  192.76   31.66
 -14 -11   4  170.56   24.37
  11  14   4  149.67   29.08
  11 -14   4  177.72   31.62
 -14 -11   4  178.20   35.96
 -11 -14   4  255.90   40.89
  14  11   4  220.15   35.61
 -11 -14   4  156.43   21.21
 -11  14   4  235.44   37.57
 -14  11   4  195.43   36.60
  14 -11   5   19.72   18.43
 -14 -11   5   30.15   24.13
 -11  14   5   13.66   14.66
 -11 -14   5   58.72   26.12
  11 -14   5   -3.92   11.74
  14  11   5   23.05   17.55
 -14  11   5   25.51   19.67
  11  14   5    7.52   13.07
  11  14   6  211.97   45.50
  14 -11   6  166.98   41.90
 -11 -14   6  226.85   45.47
  14  11   6  184.83   42.87
 -14  11   6  189.68   45.58
  11 -14   6  148.16   37.71
 -11  14   6  225.40   50.76
 -14 -11   6  174.58   49.66
 -11 -14   7   82.64   37.41
  11  14   7    1.48   18.37
 -11  14   7   34.95   35.26
  14 -11   7    2.00   17.47
  14  11   7   21.48   25.99
 -14  11   7   46.69   28.86
  11 -14   7   58.20   30.79
 -14 -11   7   14.61   20.70
  11 -14   8   -0.33   22.45
  11  14   8  -25.40   26.33
  14  11   8  -10.49   19.17
  14 -11   8    4.04   23.81
 -11 -14   8   -8.54   20.71
 -14 -11   8    3.29   20.56
 -11  14   8   -9.29   18.25
 -14  11   8   26.58   34.76
 -14 -11   9  198.79   59.96
  11  14   9  111.53   48.51
  14  11   9  132.83   53.83
 -11  14   9  149.79   53.16
  14 -11   9  115.24   40.67
 -11 -14   9  131.55   46.41
 -14  11   9  186.60   49.83
  11 -14   9  168.21   59.11
 -14  11  10   66.35   41.82
 -11 -14  10    3.21   27.93
 -11  14  10   37.24   29.82
  11  14  10   24.13   31.33
  14  11  10  -22.07   23.63
 -14 -11  10   93.47   45.34
 -14 -11  11    3.99   28.55
 -11 -14  11   31.02   37.66
 -14  11  11  -18.26   25.38
 -11  14  11   40.21   24.68
  14  12   0 5223.55  129.76
 -12  14   0 5384.10   99.53
  12  14   0 5506.63  135.33
 -14  12   0 5471.69   83.87
  14  12   1  597.50   44.48
  14 -12   1  566.36   25.51
 -14  12   1  601.57   32.34
 -14 -12   1  594.84   44.30
  12 -14   1  552.90   31.30
 -12  14   1  583.85   35.42
 -12 -14   1  563.55   45.25
  12  14   1  612.11   45.71
 -14  12   2   60.99   13.70
 -14 -12   2   54.05   17.47
 -12  14   2   59.75   14.30
  12 -14   2   54.96   12.18
  12  14   2   48.80   16.32
  14 -12   2   50.01   10.68
  14  12   2   57.54   16.99
 -12 -14   2   39.65   13.82
 -14 -12   2   49.04   15.60
 -14 -12   3   87.69   19.70
  14 -12   3   71.41   15.57
  12  14   3   88.43   21.95
 -12  14   3   85.95   21.23
  12 -14   3   83.13   18.52
 -12 -14   3   98.12   18.61
 -12 -14   3   91.52   22.50
 -14  12   3   84.90   21.31
  14  12   3   67.46   18.90
 -14 -12   3   75.52   21.18
 -12  14   4  346.01   44.49
  12  14   4  324.83   42.55
  14 -12   4  343.96   41.76
 -14  12   4  399.39   48.11
 -12 -14   4  395.42   33.83
 -12 -14   4  391.25   47.24
 -14 -12   4  391.53   37.22
 -14 -12   4  402.47   48.18
  14  12   4  345.00   41.77
  12 -14   4  354.87   42.97
  12  14   5  213.88   38.69
 -12 -14   5  230.76   40.74
 -14  12   5  189.08   40.20
 -14 -12   5  147.53   33.89
  14 -12   5  209.94   36.27
  14  12   5  207.42   36.58
 -12  14   5  175.78   36.99
  12 -14   5  212.12   37.50
 -12 -14   5  173.88   21.39
  14  12   6  658.98   72.58
  12  14   6  614.97   70.39
 -14 -12   6  719.99   74.77
 -12 -14   6  545.24   67.37
  14 -12   6  657.05   68.30
  12 -14   6  693.09   73.63
 -14  12   6  671.32   74.79
 -12  14   6  599.03   75.62
  12  14   7    9.01   20.49
  14  12   7   46.08   30.21
  14 -12   7    1.58   20.21
 -14 -12   7   20.62   19.69
  12 -14   7   60.11   31.15
 -12  14   7   64.36   36.60
 -14  12   7   24.24   30.65
 -12 -14   7   52.23   34.02
 -12  14   8   -6.64   22.31
  14 -12   8   40.32   27.75
  12 -14   8   78.21   35.41
 -12 -14   8   14.32   28.61
  14  12   8   44.32   21.35
 -14 -12   8   25.73   25.27
 -14  12   8   28.72   20.29
  12  14   8  -10.47   24.22
 -14  12   9  220.28   61.22
  14 -12   9  166.25   51.49
  12 -14   9  210.48   57.13
 -12 -14   9  165.34   60.15
  12  14   9  178.76   57.84
 -12  14   9  160.88   56.30
  14  12   9  120.78   53.26
 -14 -12   9  227.44   63.88
 -12 -14  10  155.18   55.51
  12  14  10   71.31   35.28
 -12  14  10  117.61   46.69
 -14  12  10   84.86   54.23
  14  12  10  130.89   48.43
 -14 -12  10   50.37   39.01
 -12  14  11   30.98   31.65
 -14 -12  11   -3.96   27.38
 -12 -14  11   17.93   26.66
 -14  12  11  -20.56   31.22
  13  14   0   71.04   25.80
 -13  14   0   77.43   18.52
 -14  13   0  115.39   19.59
  14  13   0  124.63   29.30
  13  14   1  220.50   29.50
  13 -14   1  220.46   18.71
 -13  14   1  266.63   24.47
 -13 -14   1  245.33   30.42
 -14  13   1  252.52   22.10
  14 -13   1  230.49   16.89
  14  13   1  246.64   30.58
 -14 -13   1  248.68   32.33
  13 -14   2   65.46   13.00
 -13  14   2   78.31   15.13
  13  14   2   75.98   19.87
 -13 -14   2   73.40   17.14
 -14 -13   2   97.33   21.03
 -14 -13   2   80.19   19.42
  14 -13   2   75.44   13.05
  14  13   2   63.51   15.61
 -14  13   2   84.64   17.34
 -13  14   3  194.52   31.06
  14  13   3  167.45   32.21
 -13 -14   3  237.77   38.41
 -14 -13   3  242.48   40.76
  13  14   3  159.40   33.63
  13 -14   3  163.57   24.18
 -14  13   3  230.73   37.94
 -14 -13   3  221.26   33.22
 -13 -14   3  213.28   30.16
  14 -13   3  169.32   25.45
  13 -14   4  212.34   33.22
  14 -13   4  177.85   30.16
 -14 -13   4  170.45   35.78
  14  13   4  200.78   36.82
 -13 -14   4  193.66   25.27
 -14 -13   4  194.51   26.62
  13  14   4  178.30   32.46
 -13 -14   4  256.74   40.34
 -13  14   4  244.95   39.15
 -14  13   4  248.64   38.36
  14 -13   5   16.17   14.94
 -13 -14   5   33.14   22.89
  13  14   5   14.49   15.16
  13 -14   5   42.59   19.69
  14  13   5   22.29   26.26
 -13 -14   5    6.23    6.93
 -14 -13   5   37.98   23.02
 -14  13   5   43.42   20.77
 -14 -13   5    6.88    6.87
 -13  14   5   26.24   23.22
 -13  14   6  153.99   47.55
  13  14   6  156.94   43.11
 -14  13   6  187.91   41.95
 -14 -13   6  171.94   50.60
  14  13   6  159.77   41.62
  14 -13   6  181.97   41.01
 -13 -14   6  177.74   45.44
  13 -14   6  177.78   40.66
  14 -13   7   47.30   27.62
 -14  13   7   69.25   32.59
  14  13   7   77.80   36.59
  13  14   7   25.69   36.49
 -14 -13   7   83.54   37.78
 -13 -14   7   35.27   31.56
  13 -14   7   67.84   32.84
 -13  14   7   47.84   30.77
 -14  13   8  -18.51   20.07
  14 -13   8   33.34   25.89
  13 -14   8   34.58   26.26
 -13 -14   8   92.97   40.15
  14  13   8   32.06   29.25
 -14 -13   8   69.38   37.14
 -13  14   8   16.59   26.80
  13  14   8   46.65   31.49
 -13 -14   9  290.10   67.07
  13 -14   9  175.98   50.85
  14 -13   9  144.51   50.15
  14  13   9  230.44   62.18
 -14 -13   9  202.86   60.45
  13  14   9  205.93   57.12
 -13  14   9  191.89   58.42
 -14  13   9  220.13   58.34
 -13 -14  10   93.89   50.17
  13  14  10   36.16   32.18
 -14 -13  10    9.31   24.79
 -13  14  10   33.36   32.22
 -14  13  10   45.30   30.20
  14  13  10   72.67   45.60
 -14 -13  11  -10.26   26.82
 -13 -14  11   -7.02   31.09
 -13  14  11  -37.48   39.08
 -14  13  11  -32.17   32.49
 -14  14   0 5453.70   95.50
  14  14   0 5447.34  138.95
  14  14   1  524.20   45.09
 -14  14   1  520.95   32.71
  14 -14   1  500.28   27.42
 -14 -14   1  571.24   45.77
 -14 -14   2   14.61    9.82
  14 -14   2   39.04    9.80
 -14  14   2   45.52   12.66
  14  14   2   28.54   14.71
 -14 -14   3  104.59   23.43
  14 -14   3   86.86   17.37
 -14  14   3   95.83   21.46
  14  14   3   94.98   25.12
 -14 -14   3   96.19   27.41
  14  14   4  242.20   38.92
  14 -14   4  232.98   34.71
 -14 -14   4  271.77   30.24
 -14  14   4  267.91   39.26
 -14 -14   4  247.41   41.52
  14 -14   5  283.57   43.61
 -14 -14   5  336.10   49.27
  14  14   5  280.44   44.12
 -14 -14   5  257.50   28.35
 -14  14   5  317.48   48.56
  14 -14   6  368.96   53.64
 -14 -14   6  405.80   61.35
 -14  14   6  420.27   60.65
  14  14   6  419.29   58.57
 -14 -14   7   38.82   30.83
  14 -14   7   24.65   27.10
 -14  14   7   29.59   25.82
  14  14   7   19.55   19.96
 -14 -14   8   53.19   32.87
  14  14   8   61.84   38.04
  14 -14   8   -1.43   16.50
 -14  14   8   21.48   30.95
  14 -14   9   73.62   40.01
 -14 -14   9  182.68   54.45
  14  14   9  138.78   48.20
 -14  14   9  124.28   50.34
  14  14  10  113.65   52.62
 -14 -14  10    8.87   24.64
 -14  14  10  122.74   44.91
 -14 -14  11   11.07   26.65
   0  15   0   93.87   24.70
 -15   0   0   96.29   32.30
 -15   0   0  112.54   16.81
   0  15  -1 2708.14   86.69
   0 -15   1 2689.89   86.11
   0  15   1 2658.96   90.81
 -15   0   1 2605.39   95.73
 -15   0  -1 2434.03   93.36
  15   0   1 2555.36   51.95
 -15   0   1 2524.60   69.80
   0 -15   2   62.05   16.02
 -15   0   2   66.99   15.60
   0  15   2   28.39   13.67
 -15   0  -2   62.41   17.38
  15   0   2   61.18   10.29
 -15   0   2   51.79   13.88
   0  15   3  225.67   40.09
   0 -15   3  265.96   39.63
 -15   0   3  178.85   33.55
  15   0   3  184.86   25.80
 -15   0  -3  224.19   35.13
   0 -15   4   62.57   23.41
   0  15   4   59.37   23.11
 -15   0   4   81.29   27.27
 -15   0  -4   55.77   24.24
  15   0   4   57.76   18.72
   0  15   5    5.36   13.04
 -15   0  -5   14.34   13.34
   0 -15   5   10.70   13.34
 -15   0   5   24.65   15.83
  15   0   5    2.61   11.47
  15   0   6  157.57   38.90
 -15   0  -6  292.92   50.18
   0 -15   6  249.57   48.37
   0  15   6  227.94   47.23
 -15   0   6  208.72   52.23
 -15   0  -7   52.34   25.90
 -15   0   7   66.41   34.67
   0 -15   7   19.80   19.46
   0  15   7   97.35   33.76
  15   0   7   40.73   30.78
   0  15   8   43.84   25.43
  15   0   8   16.92   23.50
   0 -15   8  -20.73   21.36
 -15   0   8   39.22   32.02
 -15   0   9  136.48   55.66
   0 -15   9  254.33   62.06
   0  15   9  201.84   54.91
  15   0   9  174.97   55.34
 -15   0  10   52.77   39.00
   0 -15  10   13.38   30.40
  15   0  10   52.15   32.48
   0  15  10   77.25   40.11
   0 -15  11  -28.91   36.84
   0  15  11   30.19   40.93
 -15   0  11  -24.84   30.88
 -15  -1   0    6.81    8.19
 -15  -1   0   -0.23    5.38
  -1  15   0   -5.79    5.26
 -15   1   0    4.85    2.64
 -15   1   0   10.01    6.24
   1  15   0   -6.65    5.33
  -1 -15   1 1916.47   74.70
 -15   1   1 1840.62   60.29
 -15   1  -1 2200.47   89.04
  15   1   1 1860.71   48.91
   1  15   1 1844.54   76.44
 -15  -1  -1 2012.80   83.32
  -1  15  -1 1989.06   73.74
  -1  15   1 1893.72   77.48
 -15   1   1 2028.32   85.64
   1  15  -1 1869.73   73.50
   1 -15   1 2019.12   74.00
  15  -1   1 1842.37   39.96
 -15  -1   1 1941.31   82.86
 -15  -1   1 1806.50   58.87
  -1 -15   2  344.17   32.36
  15  -1   2  354.40   22.63
 -15  -1   2  372.66   33.16
 -15   1   2  349.00   33.68
   1 -15   2  343.06   31.24
  -1  15   2  328.46   34.51
 -15   1   2  356.06   38.01
 -15   1  -2  385.14   37.88
 -15  -1   2  385.97   36.47
  15   1   2  335.21   24.72
 -15  -1  -2  379.83   37.13
 -15  -1  -3 2856.35  111.15
   1  15   3 3124.11  109.81
  -1 -15   3 3266.28  107.64
  -1  15   3 3023.34  107.04
 -15   1  -3 3061.93  110.11
  15  -1   3 3304.64   91.15
 -15  -1   3 2957.20  109.46
  15   1   3 3272.24   93.09
 -15   1   3 3039.10  114.31
   1 -15   3 3227.74  105.58
  15   1   4  107.87   22.20
  -1 -15   4  119.81   25.26
 -15  -1  -4   73.64   24.07
 -15  -1   4   90.40   24.03
   1  15   4  101.51   24.71
 -15   1   4  109.26   30.77
   1 -15   4  109.93   25.57
  -1  15   4   96.84   24.11
  15  -1   4  117.89   22.18
 -15   1  -4   84.72   22.74
 -15   1   5   15.42   17.19
  -1 -15   5   -3.20   10.98
 -15  -1   5   -9.11   12.51
  15   1   5   18.30   12.92
   1 -15   5   22.61   18.21
 -15   1  -5   13.40   13.90
  -1  15   5   12.85   11.18
   1  15   5    1.85   15.27
  15  -1   5   13.45   12.94
 -15  -1  -6  248.10   48.82
  -1  15   6  203.50   45.51
 -15  -1   6  153.58   44.68
  15   1   6  145.14   40.49
 -15   1  -6  208.86   40.78
  -1 -15   6  161.61   43.00
   1  15   6  121.15   35.07
   1 -15   6  164.13   39.51
  15  -1   6  170.43   39.21
 -15   1   6  158.73   44.22
 -15   1   7  181.45   42.09
   1 -15   7  178.43   42.69
  -1 -15   7  174.78   40.79
 -15  -1  -7  238.67   49.37
  15  -1   7  161.61   39.04
   1  15   7  203.94   47.12
  15   1   7  132.29   36.57
  -1  15   7  129.07   38.87
 -15  -1   7  119.94   43.59
  -1 -15   8   23.50   27.00
 -15  -1   8   63.79   30.04
   1 -15   8   56.03   28.85
   1  15   8   67.29   35.26
  -1  15   8   59.54   36.41
 -15   1   8   83.27   35.88
  15   1   8   28.21   22.53
  15  -1   8   45.30   26.71
 -15   1   9  219.33   54.58
   1 -15   9  159.28   48.68
   1  15   9  229.77   62.73
  15  -1   9  141.45   47.05
  -1 -15   9  204.52   59.97
  15   1   9  201.05   56.69
  -1  15   9  150.47   55.69
 -15  -1   9  210.34   64.35
 -15   1  10   25.36   29.42
 -15  -1  10   39.88   32.38
  -1 -15  10   16.15   29.90
   1 -15  10    1.16   22.51
   1  15  10   14.33   28.27
  -1  15  10   56.17   45.10
  15  -1  10   22.25   29.70
  15   1  10   -3.20   20.92
 -15  -1  11    1.52   27.72
 -15   1  11   55.15   37.77
  -1 -15  11   38.24   35.11
  -1  15  11   28.23   35.64
   1 -15  11   34.39   32.77
   1  15  11    5.50   27.27
 -15  -2   0   29.17   13.65
 -15  -2   0   41.38   10.83
 -15   2   0  120.27   34.19
 -15   2   0  131.22   17.41
  -2  15   0   64.10   19.34
   2  15   0   86.25   22.53
  15  -2   1 1981.59   35.63
 -15  -2  -1 1966.23   82.52
  -2 -15   1 2132.53   78.14
   2 -15   1 2209.78   75.27
  -2  15  -1 2056.45   74.66
 -15  -2   1 1993.60   83.73
 -15   2   1 1932.89   63.57
  15   2   1 1988.83   54.30
 -15   2   1 1946.38   86.08
   2  15   1 2027.66   78.91
  -2  15   1 2021.78   76.68
   2  15  -1 1976.76   77.16
 -15  -2   1 1935.43   61.78
  -2 -15   2   68.40   18.90
 -15   2  -2   52.15   16.89
 -15  -2   2   58.15   16.59
 -15  -2  -2   54.67   17.37
  15   2   2   52.20   12.22
 -15   2   2   55.63   15.71
   2 -15   2   65.86   17.68
  15  -2   2   49.09    8.66
  -2  15   2   54.43   18.45
 -15  -2   2   64.30   15.90
  15   2   3  173.14   25.00
   2  15   3  221.80   37.67
 -15   2   3  171.70   32.10
 -15  -2   3  193.93   32.70
   2 -15   3  269.60   35.21
  -2 -15   3  313.42   41.05
 -15  -2   3  201.99   29.73
 -15   2  -3  242.08   35.25
  15  -2   3  177.22   23.21
  -2  15   3  213.96   42.82
  15   2   4  104.69   23.44
 -15  -2   4  121.10   30.62
   2  15   4   93.85   24.87
  -2 -15   4   93.28   25.26
  -2  15   4   87.81   24.19
   2 -15   4   92.87   24.39
 -15   2  -4   91.29   25.60
  15  -2   4   69.38   17.77
 -15   2   4   67.12   26.34
 -15   2   5   46.22   23.56
  -2  15   5   30.52   18.27
   2 -15   5   45.05   21.33
  15  -2   5   42.31   19.61
   2  15   5   45.85   20.63
  15   2   5   59.25   21.66
  -2 -15   5   51.06   21.55
 -15   2  -5   10.95   13.88
 -15  -2   5   13.73   14.33
 -15   2  -6  208.72   40.92
  15  -2   6  123.07   30.85
 -15  -2   6  213.42   51.35
  -2 -15   6  182.68   45.04
  -2  15   6  146.06   41.41
   2 -15   6  157.45   47.87
   2  15   6  150.26   42.31
 -15   2   6  145.22   44.41
  15   2   6  161.78   37.55
 -15   2   7   62.51   32.36
  15   2   7   46.21   24.78
   2  15   7   72.94   31.77
  -2  15   7   56.52   27.26
 -15  -2   7   54.55   31.87
   2 -15   7   35.96   25.87
  15  -2   7   72.40   32.72
  -2 -15   7   40.27   25.07
  15  -2   8    1.26   18.71
  15   2   8    3.17   16.69
   2 -15   8  -23.90   26.08
 -15   2   8   10.11   26.69
  -2 -15   8    0.11   16.87
 -15  -2   8    0.98   16.62
  -2  15   8   32.16   31.03
   2  15   8   13.02   20.54
 -15  -2   9  157.19   54.70
 -15   2   9   95.63   46.00
  -2  15   9  141.71   51.60
  -2 -15   9  143.38   52.41
   2  15   9  110.41   52.81
  15   2   9  132.71   46.60
   2 -15   9  139.80   51.99
  15  -2   9  209.52   53.32
 -15   2  10   31.60   31.04
   2  15  10   17.30   31.91
   2 -15  10   35.13   35.22
  -2 -15  10   12.97   37.23
 -15  -2  10   48.18   37.51
  -2  15  10   46.90   29.95
  15  -2  10   62.54   36.63
  15   2  10    1.86   26.80
  -2 -15  11  -27.61   36.94
  -2  15  11   34.57   36.20
 -15   2  11    6.70   26.83
   2  15  11  -18.64   23.84
 -15  -2  11  -57.06   33.58
  -3  15   0   -9.29    7.44
 -15   3   0   14.75    4.65
 -15  -3   0    1.11    6.51
 -15  -3   0    3.60    4.54
 -15   3   0   24.66   12.04
 -15   3   1 1327.24   53.51
   3 -15   1 1389.52   60.61
  -3 -15   1 1491.01   66.89
 -15   3   1 1383.57   73.94
  -3  15   1 1402.14   63.09
 -15  -3  -1 1384.56   71.49
  15   3   1 1383.42   48.37
   3  15   1 1362.92   67.03
 -15   3  -1 1458.27   72.95
 -15  -3   1 1463.13   70.76
 -15  -3   1 1369.20   54.03
 -15  -3  -2  734.77   54.16
  15  -3   2  678.54   28.66
 -15  -3   2  691.69   44.47
 -15   3  -2  702.02   51.26
  -3 -15   2  650.13   44.75
  -3  15   2  669.26   47.05
 -15  -3   2  720.13   50.18
   3 -15   2  695.85   43.56
  15   3   2  623.12   37.02
 -15   3   2  654.71   48.65
 -15  -3   3 1709.61   79.86
   3  15   3 1689.15   80.24
   3 -15   3 1791.85   77.29
 -15  -3   3 1649.67   75.94
 -15   3  -3 1628.35   81.25
  -3 -15   3 1893.43   82.37
  15  -3   3 1785.90   65.05
  -3  15   3 1739.53   80.86
 -15   3   3 1618.73   88.68
  15   3   3 1701.77   69.65
  -3  15   4  100.51   24.55
 -15   3   4   74.52   26.85
   3 -15   4   70.94   21.50
   3  15   4   75.39   23.03
 -15   3  -4   72.48   21.50
 -15  -3   4   82.06   25.71
  15   3   4   74.84   21.49
  -3 -15   4   67.42   25.46
  15  -3   4   77.85   19.90
   3 -15   5   -4.86   16.10
  -3  15   5   -0.59   11.34
  15  -3   5   -1.52    9.77
 -15   3  -5   -6.92   13.01
 -15  -3   5   47.23   23.19
 -15   3   5    9.58   13.58
  -3 -15   5   18.83   15.67
   3  15   5   24.33   19.59
  15   3   5   -3.41   10.29
   3 -15   6  129.42   34.93
  15  -3   6   98.97   29.96
  -3  15   6  127.14   35.92
 -15   3  -6  141.86   30.84
  15   3   6   98.17   29.68
   3  15   6  117.74   36.90
  -3 -15   6  116.34   33.40
 -15   3   6  106.21   36.96
 -15  -3   6  141.93   40.89
 -15  -3   7  152.94   43.66
  -3 -15   7  135.62   36.48
   3  15   7  151.58   41.63
  15   3   7  129.58   37.51
  -3  15   7  138.97   39.43
   3 -15   7  171.34   43.46
 -15   3   7  185.36   46.08
  15  -3   7  156.85   39.65
 -15   3   8  139.42   45.49
   3 -15   8  153.86   44.73
  -3  15   8   72.05   31.84
   3  15   8   88.62   35.91
 -15  -3   8  115.05   42.28
  15   3   8   94.37   35.43
  15  -3   8   89.42   36.02
  -3 -15   8   92.33   35.42
  15  -3   9   95.73   48.56
 -15   3   9   65.17   40.24
   3 -15   9   96.48   42.12
  -3 -15   9  146.25   54.14
  -3  15   9  110.77   47.49
  15   3   9  125.91   45.10
   3  15   9  143.59   49.53
 -15  -3   9   90.72   42.32
   3 -15  10   10.90   27.11
  -3 -15  10   33.53   33.43
   3  15  10   41.34   32.23
  -3  15  10   21.15   26.25
  15   3  10  -22.11   26.95
 -15  -3  10   18.76   33.61
 -15   3  10  -23.29   25.08
  15  -3  10   -4.71   20.16
 -15  -3  11   12.03   26.34
   3  15  11   -8.75   31.60
  -3  15  11   -4.40   27.06
 -15   3  11  -25.65   29.98
  -3 -15  11    0.08   24.08
  -4  15   0  153.12   22.79
   4  15   0  194.09   30.12
 -15   4   0  159.86   32.33
 -15  -4   0  130.32   22.72
 -15  -4   0  121.77   16.15
  15   4   1  947.77   41.97
 -15   4   1  925.90   63.06
 -15  -4  -1  871.60   58.59
 -15  -4   1  986.19   59.03
 -15   4   1  926.69   44.09
 -15   4  -1  894.11   58.70
 -15  -4   1  962.91   46.49
   4  15   1 1018.34   60.15
  -4  15   1  956.62   51.91
  -4 -15   1  936.73   54.46
   4 -15   1  863.36   48.72
 -15   4   2  130.41   23.33
 -15  -4   2  125.49   23.21
  15   4   2  124.61   19.72
  -4  15   2  172.23   28.91
   4 -15   2  140.24   22.96
  15  -4   2  127.20   12.74
 -15  -4   2  123.88   21.99
 -15   4  -2  124.87   25.04
  -4 -15   2  157.77   27.25
   4  15   2   78.52   20.57
  -4  15   3  135.57   29.18
  15   4   3   62.66   17.25
 -15   4   3   60.70   20.46
 -15   4  -3   66.67   20.34
 -15  -4   3   66.90   18.75
   4  15   3   71.34   24.69
   4 -15   3   73.31   18.06
  15  -4   3   60.75   14.95
 -15  -4   3   92.47   22.84
  -4 -15   3  128.58   29.44
 -15   4   4   67.68   24.52
  -4  15   4   64.56   22.33
  -4 -15   4   40.97    7.69
   4  15   4   60.28   20.63
 -15  -4   4   60.66   23.03
  -4 -15   4   80.67   24.56
 -15   4  -4   34.10   16.66
  15   4   4   62.40   19.17
  15  -4   4   46.26   16.20
   4 -15   4   67.47   22.05
  15   4   5   59.95   20.72
 -15   4  -5   67.20   21.93
 -15   4   5   74.75   30.66
  -4  15   5   32.67   21.53
   4 -15   5   78.24   29.00
  -4 -15   5   62.49   26.46
   4  15   5   51.94   22.31
  15  -4   5   73.15   22.28
 -15  -4   5  112.88   32.33
  15  -4   6   56.12   22.51
 -15  -4   6   99.01   37.77
   4 -15   6   77.57   37.28
   4  15   6   84.81   34.52
 -15   4   6  119.77   38.33
  -4  15   6   69.40   28.89
  -4 -15   6  103.85   33.41
  15   4   6   82.24   29.17
 -15   4  -6  104.61   26.63
 -15   4   7   70.65   34.75
 -15  -4   7   27.81   28.18
  -4 -15   7   64.49   27.66
   4 -15   7   44.67   32.72
   4  15   7  148.14   39.53
  15  -4   7   82.51   32.60
  -4  15   7   78.97   33.97
  15   4   7   66.91   25.19
  15   4   8   55.32   33.32
   4  15   8   55.64   32.41
 -15  -4   8   71.76   39.26
 -15   4   8   93.96   37.73
  -4  15   8   -8.31   17.50
   4 -15   8   68.12   35.35
  -4 -15   8  -20.51   17.89
  15  -4   8   31.10   33.47
 -15   4   9   20.24   32.75
  -4 -15   9   89.51   40.54
   4  15   9   91.15   45.59
  15   4   9   47.06   27.50
   4 -15   9   45.64   27.98
  -4  15   9   41.92   36.68
 -15  -4   9   84.23   39.46
  15  -4   9   24.15   28.77
  15  -4  10   37.44   30.79
 -15  -4  10   31.35   31.33
 -15   4  10   51.68   34.86
   4 -15  10  105.58   45.67
   4  15  10   64.26   43.79
  -4 -15  10   -4.77   24.91
  -4  15  10   -8.94   23.11
  15   4  10   -0.43   27.53
  -4 -15  11   49.39   45.88
 -15   4  11  -20.55   31.79
  -4  15  11  -58.26   37.17
   4  15  11   66.13   45.48
 -15  -4  11    0.07   24.60
 -15  -5   0   19.12    8.52
  -5  15   0   32.34   10.01
 -15   5   0   38.81   15.98
 -15  -5   0   17.58   10.86
   5 -15   1  534.05   36.36
  -5 -15   1  632.96   44.89
  15   5   1  519.07   33.00
 -15   5   1  503.94   30.39
   5  15   1  551.08   44.16
  -5  15   1  492.37   37.19
 -15   5  -1  496.56   46.41
 -15  -5   1  477.23   33.63
 -15  -5   1  522.98   43.77
 -15  -5   2 1149.74   64.51
  15   5   2 1016.11   51.73
 -15  -5   2 1143.76   58.96
  -5  15   2 1095.12   59.39
  15  -5   2 1082.43   33.95
 -15   5   2 1131.00   60.71
  -5 -15   2 1133.16   60.82
 -15   5  -2 1061.03   67.31
   5  15   2 1116.79   65.53
   5 -15   2 1057.97   54.46
   5  15   3  736.60   54.35
   5 -15   3  795.09   51.16
 -15   5   3  748.63   57.53
 -15  -5   3  717.92   49.25
  -5  15   3  743.13   53.21
  15   5   3  737.50   48.54
  15  -5   3  766.66   42.58
 -15  -5   3  732.62   53.14
 -15   5  -3  721.36   53.83
  -5 -15   3  805.77   55.21
 -15   5  -4   24.04   13.12
 -15  -5   4   36.14   20.24
  -5 -15   4   19.40    6.52
  15  -5   4   47.52   15.78
   5  15   4   41.04   19.65
  -5 -15   4   41.71   17.78
  15   5   4   22.92   14.59
  -5  15   4   32.60   18.57
 -15   5   4   66.14   27.40
   5 -15   4   57.48   20.09
  -5 -15   5   29.98   23.82
   5  15   5   39.60   20.92
 -15   5  -5   35.55   18.15
   5 -15   5   28.21   24.01
  -5  15   5   22.24   21.15
  15  -5   5   33.47   17.35
 -15   5   5   25.54   22.24
 -15  -5   5   39.15   24.90
  15   5   5   18.61   17.98
 -15   5   6   42.67   25.44
  -5  15   6    3.99   15.26
  15  -5   6   16.39   14.23
  15   5   6   52.55   28.36
   5 -15   6   69.53   30.97
  -5 -15   6   34.57   21.22
 -15   5  -6   69.00   20.00
 -15  -5   6   44.44   27.20
   5  15   6   44.95   24.74
  15  -5   7  107.20   36.39
   5  15   7  103.03   36.49
   5 -15   7   61.65   35.58
 -15  -5   7  103.80   41.09
  -5  15   7   63.55   32.18
  -5 -15   7   65.51   31.30
  15   5   7   58.78   30.10
 -15   5   7  110.15   37.76
  15  -5   8  112.54   38.65
  -5  15   8  127.28   40.86
 -15  -5   8  144.03   44.78
  15   5   8   98.87   39.68
   5  15   8  148.28   45.55
 -15   5   8  107.66   42.55
   5 -15   8  136.65   43.36
  -5 -15   8  114.39   47.29
 -15   5   9   44.34   36.40
   5  15   9   47.54   35.09
 -15  -5   9   26.51   27.13
   5 -15   9   -0.39   23.86
  15  -5   9    5.39   17.77
  15   5   9   25.02   26.36
  -5  15   9   63.56   37.47
  -5 -15   9   62.63   34.02
  -5  15  10   17.50   22.55
 -15  -5  10  -25.15   20.68
   5 -15  10  -11.07   22.75
   5  15  10   41.20   38.13
  -5 -15  10  -11.85   25.85
 -15   5  10   40.60   35.21
  15   5  10   33.27   30.90
 -15  -5  11    8.17   30.81
  -5  15  11   24.69   28.94
   5  15  11   41.68   35.32
  -5 -15  11   37.99   40.73
 -15   5  11    6.79   27.20
 -15  -6   0  231.67   24.24
 -15  -6   0  192.88   27.26
 -15   6   0  236.62   35.67
   6  15   0  222.30   28.58
  -6  15   0  210.79   23.92
   6 -15   1  292.34   27.86
  -6 -15   1  397.30   37.63
  15   6   1  321.92   28.28
   6  15   1  337.03   35.52
 -15   6   1  303.58   22.78
 -15  -6   1  341.32   35.43
 -15  -6   1  315.24   28.88
  -6  15   1  322.76   30.62
 -15   6  -1  332.57   38.43
 -15  -6   2  324.19   33.12
   6 -15   2  329.62   32.33
  15  -6   2  311.60   18.35
  -6  15   2  351.23   37.30
 -15   6  -2  289.98   38.37
 -15  -6   2  309.30   36.20
  -6 -15   2  402.50   39.25
 -15   6   2  363.19   34.22
   6  15   2  323.18   41.22
  15   6   2  329.41   31.61
  -6 -15   3  107.30   22.87
  15   6   3   82.45   17.87
 -15  -6   3   91.50   18.68
 -15  -6   3  106.23   22.89
   6  15   3   78.25   22.36
  -6  15   3  102.56   21.73
 -15   6  -3  123.31   24.24
 -15   6   3   80.82   19.08
   6 -15   3   81.88   18.77
  15  -6   3   86.30   15.33
 -15  -6   4   38.34   20.77
  15  -6   4   20.65   12.42
  -6 -15   4   15.88    6.63
  15   6   4   39.57   18.11
   6 -15   4   46.23   20.98
 -15   6   4   41.20   22.67
  -6 -15   4   33.23   21.62
   6  15   4   31.22   17.18
  -6  15   4   35.99   21.81
 -15   6  -4   29.11   15.23
 -15   6   5  117.33   38.22
  -6 -15   5  112.33   31.77
  15  -6   5  117.36   27.32
 -15  -6   5  114.60   35.63
   6 -15   5  138.57   31.52
   6  15   5  153.20   33.88
  15   6   5  125.23   30.08
 -15   6  -5  100.86   27.08
  -6  15   5   82.77   31.70
  15  -6   6    4.57   15.97
   6  15   6   30.62   20.71
 -15   6   6   36.64   23.12
  -6 -15   6   46.86   24.58
  15   6   6   39.43   20.41
  -6  15   6   -1.31   16.69
   6 -15   6   13.33   21.18
 -15   6  -6   13.35   12.46
 -15  -6   6   39.22   24.72
 -15   6   7   49.92   31.80
   6 -15   7   48.43   27.06
 -15  -6   7   71.48   36.19
  -6  15   7   71.76   35.64
  15   6   7  102.47   34.75
  15  -6   7   64.42   29.87
  -6 -15   7   51.13   25.07
   6  15   7   45.94   31.01
 -15   6   8   -0.60   22.16
   6 -15   8   62.17   33.98
  -6  15   8   32.10   28.74
 -15  -6   8   43.98   35.09
  -6 -15   8   74.56   36.09
  15   6   8   86.63   40.10
  15  -6   8   22.57   26.94
   6  15   8   47.96   30.21
  15   6   9   27.45   23.42
  -6 -15   9  -53.95   33.90
   6 -15   9   -4.12   21.78
  -6  15   9   31.70   23.09
 -15  -6   9   43.52   30.52
 -15   6   9   49.98   27.84
   6  15   9   -3.22   29.63
  15  -6   9   -2.98   21.59
   6 -15  10   68.28   45.47
  -6  15  10  -30.71   27.38
 -15   6  10  108.16   47.94
  -6 -15  10   68.14   40.19
   6  15  10   20.34   26.59
  15   6  10   25.65   29.65
 -15  -6  10  -17.65   25.68
  -6  15  11    0.08   31.26
  -6 -15  11   52.41   38.87
 -15  -6  11   34.28   34.60
   6  15  11   21.91   28.62
 -15   6  11   37.82   32.78
  15   7   0   19.96    9.43
   7  15   0   41.28   15.42
  -7  15   0   21.94   10.35
 -15  -7   0   10.15    8.24
  -7  15   1  356.85   31.72
   7 -15   1  381.76   30.31
   7  15   1  369.03   36.53
 -15  -7   1  380.14   32.36
 -15  -7   1  370.65   38.27
 -15   7   1  336.20   23.09
  15   7   1  362.00   31.08
 -15   7  -1  357.83   42.37
  15  -7   2  972.07   32.35
  -7 -15   2 1113.23   61.50
 -15   7  -2  931.19   66.38
   7  15   2  983.10   61.57
  -7  15   2  941.79   56.80
   7 -15   2 1028.23   50.98
 -15  -7   2 1060.03   58.37
 -15  -7   2 1033.58   63.19
 -15   7   2 1040.26   54.49
  15   7   2  993.04   53.87
 -15   7   3   63.49   17.18
 -15   7  -3   64.15   18.50
   7 -15   3   78.39   17.00
 -15  -7   3   46.58   11.14
 -15  -7   3   76.30   18.79
  -7  15   3   77.38   18.62
  15  -7   3   61.28   13.75
  15   7   3   57.90   15.62
   7  15   3   55.88   17.45
  -7 -15   3   58.66   16.64
 -15   7   4   97.54   27.30
  -7 -15   4   68.77   11.81
  -7  15   4  126.58   27.82
 -15   7  -4   83.61   23.10
   7 -15   4  105.99   26.80
   7  15   4  120.65   27.63
  15  -7   4   98.17   21.27
  15   7   4  111.40   24.72
  -7 -15   4  121.37   29.33
 -15  -7   4  106.85   27.77
 -15  -7   4   82.32   20.12
  15  -7   5   46.03   22.07
 -15  -7   5   44.08   24.23
  -7  15   5   33.78   24.42
 -15   7  -5   32.65   16.75
  -7 -15   5   29.55   25.27
 -15   7   5   20.23   16.83
   7  15   5   46.66   25.91
  15   7   5   30.56   18.77
   7 -15   5   48.07   21.65
   7  15   6   43.07   25.10
  15  -7   6   28.29   17.87
 -15   7   6   25.72   20.69
 -15   7  -6   28.35   14.55
 -15  -7   6   17.56   21.03
  15   7   6   37.16   19.26
  -7 -15   6   44.83   21.62
  -7  15   6   11.56   13.42
   7 -15   6   53.09   25.72
   7  15   7   72.40   36.89
  15  -7   7   90.91   31.77
  -7  15   7   64.06   33.84
 -15   7   7  116.35   40.15
   7 -15   7   71.95   31.88
  -7 -15   7   81.66   26.71
 -15  -7   7   85.03   37.52
  15   7   7   86.26   35.42
   7 -15   8  167.03   45.10
 -15  -7   8  202.97   50.27
  15   7   8  180.51   49.04
  15  -7   8  179.71   46.18
 -15   7   8  157.06   44.73
  -7 -15   8  181.86   48.38
   7  15   8  172.59   48.59
  -7  15   8  119.14   41.42
  15  -7   9    7.68   18.43
 -15   7   9   42.49   27.42
   7  15   9   92.18   43.81
  15   7   9   35.49   36.68
  -7 -15   9   39.21   27.67
  -7  15   9   40.09   31.82
   7 -15   9  -20.18   24.32
 -15  -7   9   13.81   20.42
   7 -15  10   36.85   41.44
 -15  -7  10   63.26   36.87
  -7 -15  10   40.84   22.29
  15   7  10   26.27   31.84
   7  15  10   51.64   41.29
  -7  15  10   11.58   23.48
 -15   7  10   13.30   36.93
 -15  -7  11   23.88   28.74
  -7  15  11   20.98   38.11
 -15   7  11   12.01   29.47
   7  15  11  -42.32   28.41
  -8  15   0  339.67   30.61
 -15  -8   0  336.24   31.51
   8  15   0  379.46   38.62
  15   8   0  298.91   28.92
  15   8   1  228.22   25.46
 -15  -8   1  240.85   28.07
  -8  15   1  214.98   25.43
 -15  -8   1  205.39   30.54
   8 -15   1  225.95   23.24
 -15   8   1  223.30   18.65
   8  15   1  217.65   29.22
   8 -15   2  126.18   20.97
 -15   8   2  127.72   20.48
 -15  -8   2   97.33   23.89
  -8  15   2  162.51   26.74
   8  15   2  145.18   29.03
  15   8   2  126.49   24.62
  15  -8   2   93.74   11.63
 -15   8  -2   97.04   23.70
 -15  -8   2  120.82   21.87
  15  -8   3   15.46    9.88
 -15  -8   3   15.31    7.39
 -15   8   3   26.44   14.80
  15   8   3   14.01   11.64
 -15  -8   3   10.01    8.03
 -15   8  -3   19.76   12.97
   8 -15   3   10.25    6.94
   8  15   3    8.51    8.00
  -8 -15   3   35.08   16.66
  -8  15   3   19.91   14.82
 -15  -8   4   56.25   16.60
 -15   8   4   70.53   28.28
   8  15   4   70.97   23.76
 -15   8  -4   81.17   22.60
  15  -8   4   66.53   19.15
   8 -15   4   80.32   21.39
  15   8   4   68.81   21.40
  -8 -15   4   56.33   11.79
 -15  -8   4  105.83   27.57
  -8  15   4   63.04   21.81
  -8 -15   4  123.62   27.44
 -15   8  -5  113.12   25.40
  15  -8   5  146.08   30.24
  -8 -15   5  176.96   41.65
 -15  -8   5  166.08   40.20
  15   8   5  127.42   32.93
   8 -15   5  141.39   34.79
 -15   8   5  140.80   38.70
  -8  15   5  107.99   35.76
   8  15   5  138.76   34.34
 -15  -8   6   62.84   27.70
 -15   8   6   67.35   28.79
  15  -8   6   33.56   16.96
   8 -15   6   26.44   20.74
  15   8   6   59.28   28.64
   8  15   6   25.86   16.94
  -8  15   6   30.83   21.31
  -8 -15   6   45.70   26.87
 -15   8   7   62.64   28.02
  -8 -15   7  105.55   35.96
  -8  15   7   46.58   33.33
  15  -8   7  107.73   34.02
   8  15   7  113.02   36.76
  15   8   7   86.21   35.74
   8 -15   7   92.22   38.89
 -15  -8   7   98.65   35.53
 -15   8   8   27.53   29.83
  15   8   8   89.40   45.64
   8 -15   8   62.01   36.64
  -8  15   8   35.17   36.32
  -8 -15   8   45.68   28.72
   8  15   8   75.60   39.50
  15  -8   8   63.48   33.33
 -15  -8   8   75.64   35.91
   8 -15   9    0.97   22.26
  15   8   9   95.03   43.98
 -15  -8   9    0.19   21.05
  -8 -15   9    1.70   18.99
   8  15   9   42.61   27.51
  15  -8   9   11.11   23.67
  -8  15   9   47.19   31.23
 -15   8   9  -25.38   25.72
 -15   8  10   69.96   38.86
   8 -15  10   43.75   42.17
  -8 -15  10   77.18   40.89
   8  15  10   58.42   37.09
  -8  15  10   -2.72   25.74
  15   8  10   24.30   38.89
 -15  -8  10  -40.63   29.00
   8  15  11    5.46   25.36
 -15  -8  11   28.62   30.05
 -15   8  11   18.41   30.86
  -8  15  11   55.17   42.86
  -8 -15  11   41.37   43.73
   9  15   0   39.63   16.83
  -9  15   0   50.98   12.39
  15   9   0   20.94   10.44
   9  15   1  233.57   30.98
  -9 -15   1  233.66   29.03
  15   9   1  205.84   24.91
  -9  15   1  200.36   23.84
 -15  -9   1  236.69   31.62
 -15   9   1  192.21   17.75
   9 -15   1  211.68   22.23
 -15  -9   1  211.63   27.19
   9  15   2  536.02   47.50
   9 -15   2  620.20   40.02
  15  -9   2  508.14   27.26
  -9 -15   2  631.23   47.93
  15   9   2  519.93   40.79
  -9  15   2  529.61   42.19
 -15  -9   2  649.59   49.30
 -15  -9   2  604.47   46.58
 -15   9   2  567.90   39.31
  -9  15   3  524.41   46.36
   9 -15   3  565.58   43.72
 -15  -9   3  500.22   46.61
 -15   9  -3  474.52   46.60
  15   9   3  496.17   44.66
  -9 -15   3  565.85   48.79
 -15  -9   3  495.90   41.93
 -15   9   3  574.85   48.86
   9  15   3  525.04   47.91
  15  -9   3  502.11   37.32
 -15  -9   4  132.02   23.13
 -15  -9   4  194.26   35.03
  -9 -15   4  137.84   18.10
  -9 -15   4  184.19   33.67
   9  15   4  158.42   32.89
   9 -15   4  190.29   32.07
  -9  15   4  158.09   30.25
  15  -9   4  145.61   26.95
 -15   9   4  180.81   36.30
 -15   9  -4  159.93   28.20
  15   9   4  204.94   33.01
 -15   9   5   74.53   27.61
   9 -15   5   42.44   20.36
  15  -9   5   57.83   23.91
  -9  15   5   53.76   26.66
  15   9   5   39.48   23.39
  -9 -15   5   74.60   28.48
   9  15   5   41.78   23.12
 -15  -9   5   87.90   31.36
 -15   9  -5   26.31   13.49
 -15   9   6   69.28   33.54
  15  -9   6   71.55   26.61
   9 -15   6   96.27   33.02
 -15  -9   6   26.03   21.56
  -9  15   6   69.57   29.05
  -9 -15   6   86.65   30.64
   9  15   6   67.91   23.90
  15   9   6   80.43   32.95
  -9 -15   7  118.05   40.65
  15  -9   7  108.66   32.72
   9 -15   7  114.82   36.44
   9  15   7  104.97   38.41
 -15  -9   7  107.17   36.61
 -15   9   7   98.65   42.56
  15   9   7   99.59   38.13
  -9  15   7  123.30   38.88
  -9 -15   8   57.53   30.77
 -15  -9   8   58.07   26.91
   9 -15   8  122.11   42.73
 -15   9   8   59.77   31.47
  -9  15   8   56.39   34.95
   9  15   8   73.88   31.35
  15   9   8  104.40   39.95
  15  -9   8   82.46   30.08
  -9  15   9   54.48   36.44
  15   9   9   93.18   44.90
 -15  -9   9   79.70   42.31
  -9 -15   9   45.69   28.48
   9 -15   9  103.74   40.07
   9  15   9   53.53   36.45
 -15   9   9   52.19   32.58
  15  -9   9   27.89   27.87
   9 -15  10   19.51   32.01
 -15  -9  10   18.08   24.22
  -9  15  10   37.99   41.11
   9  15  10   -1.55   27.28
  15   9  10   21.13   32.00
  -9 -15  10   31.28   32.19
 -15   9  10   36.68   33.43
 -15  -9  11   11.56   26.29
  -9 -15  11   46.11   39.88
   9  15  11   46.48   41.36
  -9  15  11   42.20   39.36
 -15   9  11  -39.72   31.45
  10  15   0  223.92   32.38
 -15  10   0  166.00   11.54
  15  10   0  201.66   25.77
 -10  15   0  226.74   26.31
 -10 -15   1  221.36   33.70
 -15 -10   1  172.97   24.75
 -15  10   1  175.48   17.44
 -10  15   1  176.35   21.00
  15  10   1  174.77   24.71
  10  15   1  207.84   29.18
  10 -15   1  160.58   19.04
 -15 -10   2   47.83   16.63
 -10 -15   2   60.07   20.86
  15 -10   2   26.22    8.19
 -10  15   2   51.66   17.38
  15  10   2   19.39   14.72
  10 -15   2   38.63   12.28
  10  15   2   27.95   15.58
 -15  10   2   38.42   13.56
 -15 -10   2   38.62   15.99
  15  10   3  127.65   26.51
 -15 -10   3  110.30   22.02
  15 -10   3   77.89   17.05
 -10  15   3  157.80   35.35
 -10 -15   3  180.95   40.30
  10  15   3   97.95   26.91
 -15 -10   3  110.32   26.75
  10 -15   3  105.41   19.97
 -15  10   3   98.13   22.93
 -15 -10   4   85.03   19.47
 -10  15   4  109.46   30.18
  10  15   4   84.86   25.85
 -15  10   4  139.07   31.36
  10 -15   4   96.07   24.40
  15 -10   4   94.94   22.31
 -10 -15   4  126.27   30.42
 -15 -10   4  142.65   31.77
  15  10   4  145.63   28.21
 -10 -15   4   95.57   16.13
 -10 -15   5  116.36   31.80
 -15  10   5  106.99   35.56
  15 -10   5  110.52   29.73
 -15 -10   5  126.82   37.23
  15  10   5   79.38   26.59
  10 -15   5  112.62   31.27
  10  15   5  122.35   35.31
 -10  15   5  114.07   32.33
 -15  10   6  124.25   42.22
 -10 -15   6  138.34   41.04
  15  10   6  173.83   40.50
 -15 -10   6  141.01   37.96
  15 -10   6  114.96   30.49
 -10  15   6  136.43   42.81
  10  15   6  133.94   38.17
  10 -15   6  218.45   47.40
 -15 -10   7    5.82   22.05
  15 -10   7   32.90   24.77
 -10  15   7   72.19   35.49
  15  10   7  111.23   39.35
 -15  10   7   30.35   32.65
  10  15   7   61.03   33.62
 -10 -15   7   54.31   30.10
  10 -15   7   37.67   24.63
 -15  10   8    2.72   26.34
  15 -10   8   28.76   23.30
  10  15   8   16.97   24.13
  10 -15   8   42.09   27.45
 -15 -10   8  -17.39   24.32
  15  10   8   61.79   33.22
 -10  15   8   14.48   19.63
 -10 -15   8  -19.88   19.41
 -15  10   9   22.43   33.85
  10 -15   9   43.05   36.83
 -15 -10   9  112.32   49.46
 -10  15   9   70.94   37.27
 -10 -15   9   30.26   30.61
  15  10   9  107.81   46.20
  10  15   9   87.88   37.99
  15 -10   9   62.29   33.93
  15  10  10   16.86   35.53
  10  15  10   18.59   33.34
 -10 -15  10  -16.20   24.27
 -10  15  10  -15.27   30.91
 -15 -10  10   -1.00   27.17
 -15  10  10   76.34   43.33
 -15 -10  11  -10.49   22.75
 -10 -15  11   41.96   40.91
 -15  10  11   25.05   32.81
 -10  15  11  121.26   54.79
 -15  11   0   -0.45    4.54
 -11  15   0    7.47    4.43
  11  15   0   16.38    9.59
  15  11   0    4.60    6.41
  15 -11   1  155.02   11.09
 -15 -11   1  182.47   24.80
 -11  15   1  156.46   20.17
 -11 -15   1  185.66   27.54
  15  11   1  185.13   25.31
  11  15   1  152.38   26.21
 -15  11   1  168.92   16.78
  11 -15   1  158.42   18.33
 -15  11   2  571.28   39.20
  15 -11   2  515.32   30.82
 -11  15   2  500.65   39.96
 -15 -11   2  548.54   46.97
 -15 -11   2  638.70   49.90
  11 -15   2  584.02   38.58
  11  15   2  550.70   46.87
 -11 -15   2  540.97   44.47
  15  11   2  500.78   42.20
 -11 -15   3 1893.59   93.38
  15  11   3 1708.28   83.91
 -15 -11   3 1786.07   81.64
  11 -15   3 1977.29   81.35
 -11 -15   3 1800.39   76.82
 -11  15   3 1916.87   88.81
  11  15   3 1757.35   85.72
 -15 -11   3 1852.50   89.87
 -15  11   3 1876.28   86.83
  15 -11   3 1784.02   73.84
 -11 -15   4  104.78   17.59
  15 -11   4  158.80   28.70
 -15  11   4  218.71   37.72
  11 -15   4  142.33   28.14
 -15 -11   4  135.63   22.91
 -11  15   4  175.56   32.92
  15  11   4  160.56   30.59
 -11 -15   4  122.45   32.18
  11  15   4  148.19   28.82
 -15 -11   4  151.88   31.00
 -11 -15   5   29.30   19.06
  15 -11   5   27.82   17.49
 -15 -11   5   21.66   23.08
  15  11   5   26.59   18.00
 -11  15   5   24.61   22.14
  11  15   5   11.89   16.90
  11 -15   5    5.12   14.35
 -15  11   5   63.93   27.90
 -11  15   6  142.91   43.32
  11 -15   6  103.57   32.56
 -11 -15   6   80.32   31.58
 -15 -11   6  124.12   39.94
  11  15   6   80.97   32.47
  15  11   6   84.02   30.65
 -15  11   6   70.26   30.96
  15 -11   6  104.34   32.72
 -15 -11   7   52.18   30.98
 -11 -15   7  176.46   45.55
 -11  15   7  119.65   46.59
  15 -11   7  132.22   34.96
  11 -15   7  115.26   36.31
  15  11   7  112.23   33.33
  11  15   7   97.87   30.68
 -15  11   7  146.47   40.05
  15 -11   8   39.37   23.69
  11 -15   8   69.19   29.02
 -11 -15   8    1.10   20.15
 -15 -11   8  -20.23   20.62
 -11  15   8   86.11   35.71
  11  15   8   68.48   33.58
  15  11   8   40.74   34.23
 -15  11   8   66.62   37.85
 -15  11   9   82.32   41.46
 -15 -11   9  110.16   45.03
  15  11   9  155.65   56.77
  11  15   9  123.61   52.77
  15 -11   9  101.95   41.70
  11 -15   9  164.47   54.11
 -11 -15   9  111.55   45.27
 -11  15   9   53.74   37.56
 -15 -11  10   32.46   27.76
 -11 -15  10   58.95   39.37
  11  15  10  -10.30   26.80
  15  11  10   80.82   46.42
 -11  15  10   31.19   31.98
 -15  11  10   57.67   38.77
 -15 -11  11    2.05   27.89
 -15  11  11  -68.50   39.21
 -11 -15  11   33.39   37.44
 -11  15  11  -13.42   27.58
 -15  12   0   43.48    8.06
  15  12   0   50.48   19.88
  15  12   1  314.30   33.30
  12  15   1  318.67   35.84
 -12 -15   1  355.03   38.22
 -15  12   1  333.83   24.19
  15 -12   1  306.17   17.46
  12 -15   1  320.68   24.92
 -15 -12   1  320.21   34.35
 -12  15   1  341.64   28.55
 -15  12   2   74.58   16.54
 -15 -12   2   65.22   18.64
 -15 -12   2   42.49   14.71
  15  12   2   54.21   15.44
  12  15   2   53.43   16.40
 -12 -15   2   48.21   16.47
 -12  15   2   59.29   15.67
  15 -12   2   58.38   11.28
  12 -15   2   43.32   11.74
  15 -12   3  145.20   24.46
  15  12   3  149.74   32.36
 -12 -15   3  218.37   41.41
 -15  12   3  169.01   27.51
  12 -15   3  125.68   22.53
 -12 -15   3  196.88   29.12
 -12  15   3  219.11   38.04
 -15 -12   3  119.50   30.91
  12  15   3  124.81   30.02
 -15 -12   3  177.59   28.25
 -15 -12   4  162.92   32.89
 -12  15   4  164.57   29.92
 -12 -15   4  148.68   21.43
  12 -15   4  157.99   28.98
 -15 -12   4  153.63   25.29
 -15  12   4  197.63   33.43
  12  15   4  135.74   31.26
  15  12   4  172.78   31.76
  15 -12   4  129.52   25.22
 -12 -15   4  161.00   33.87
 -15 -12   5   45.91   15.23
 -12 -15   5   34.67   11.44
 -15 -12   5   26.13   22.28
  15  12   5   33.01   18.93
  15 -12   5   44.72   19.66
  12  15   5   38.15   18.43
 -12  15   5   55.22   22.46
  12 -15   5   25.09   16.97
 -12 -15   5   39.14   24.21
 -15  12   5   65.24   26.13
 -12 -15   6  159.60   45.44
  15  12   6  153.35   40.08
  15 -12   6  173.51   39.59
  12 -15   6  162.92   41.78
 -15  12   6  176.17   49.25
  12  15   6  187.21   45.01
 -15 -12   6  238.14   49.22
 -12  15   6  154.80   44.94
  15 -12   7   37.29   25.02
  12 -15   7   35.63   25.36
  12  15   7   61.33   34.18
 -15  12   7   93.79   35.57
 -15 -12   7   61.18   31.48
 -12 -15   7  159.35   44.61
  15  12   7   55.44   34.08
 -12  15   7  115.02   43.62
  15 -12   8   41.27   29.81
  12 -15   8   33.86   31.16
 -12  15   8   23.09   27.51
 -12 -15   8   35.80   25.89
 -15 -12   8   54.88   33.11
  15  12   8   49.70   32.93
 -15  12   8    6.35   22.00
  12  15   8  -13.65   20.48
 -12 -15   9  141.84   55.95
  12 -15   9   98.23   41.98
 -15 -12   9  142.18   53.15
  15  12   9  118.01   50.78
  12  15   9  142.65   49.23
 -12  15   9  120.48   55.80
 -15  12   9  110.43   47.01
  15 -12   9  139.17   45.38
 -15 -12  10   41.53   40.16
 -12 -15  10   81.32   41.32
 -12  15  10   62.26   39.74
  12  15  10   -1.14   35.82
  15  12  10   82.77   47.00
 -15  12  10    4.28   28.58
 -15 -12  11  -39.45   41.62
 -12  15  11   17.94   23.19
 -15  12  11   51.79   29.48
 -12 -15  11   17.25   35.59
  13  15   0   19.45    8.66
 -15  13   0   -0.18    8.45
  15  13   0    4.61   13.95
 -13  15   0   -2.44    9.34
  15 -13   1  233.82   16.88
 -13 -15   1  264.95   32.02
 -15  13   1  237.23   21.02
  13  15   1  271.57   33.04
  15  13   1  245.10   31.36
 -13  15   1  248.08   24.31
  13 -15   1  231.08   21.19
 -15 -13   1  262.65   31.59
 -15 -13   2   83.80   20.51
 -13 -15   2   46.16   15.77
 -13  15   2   74.92   16.15
 -15  13   2   75.15   15.80
  13  15   2   74.76   20.33
 -15 -13   2  103.54   22.53
  13 -15   2   84.39   14.99
  15  13   2   60.36   15.33
  15 -13   2   73.26   12.39
  15 -13   3 1639.11   72.33
  13  15   3 1604.69   84.21
  13 -15   3 1685.97   75.74
 -15 -13   3 1638.34   80.71
  15  13   3 1584.79   83.05
 -13  15   3 1741.82   84.76
 -13 -15   3 1696.45   81.02
 -15  13   3 1715.09   82.71
 -15 -13   3 1799.12   89.31
 -13 -15   3 1743.80   90.51
  15 -13   4  160.38   29.91
  15  13   4  177.62   31.14
  13  15   4  197.55   34.56
 -15 -13   4  148.72   32.99
 -15  13   4  241.06   37.11
 -13  15   4  173.48   32.12
 -13 -15   4  144.15   22.51
 -13 -15   4  174.84   36.40
 -15 -13   4  135.94   23.34
  13 -15   4  170.60   29.16
 -13 -15   5   12.74    6.61
  13 -15   5   -5.86   12.65
 -15 -13   5   61.01   26.60
  15  13   5    6.42   12.91
  13  15   5   -2.48   14.86
 -13 -15   5   18.99   17.33
 -15 -13   5   12.95    9.78
  15 -13   5  -16.40   14.20
 -15  13   5    0.34   15.72
 -13  15   5   20.55   17.30
 -13 -15   6   96.58   35.36
  15  13   6  109.46   36.10
  13  15   6  117.44   34.33
  15 -13   6  100.58   29.95
 -15 -13   6  116.93   36.06
 -15  13   6  135.15   40.58
  13 -15   6   75.41   31.55
 -13  15   6   56.84   33.82
  15  13   7  160.84   41.11
 -13 -15   7  166.16   45.23
  15 -13   7  178.17   42.90
  13 -15   7  204.52   46.53
 -13  15   7  160.75   47.47
  13  15   7  181.54   42.73
 -15  13   7  213.06   51.08
 -15 -13   7  175.12   44.86
  15 -13   8   83.24   31.64
  13 -15   8   37.97   27.71
  15  13   8   77.83   37.50
 -13  15   8   88.80   36.20
  13  15   8   48.77   28.81
 -15  13   8   33.35   21.16
 -15 -13   8   75.20   35.69
 -13 -15   8  108.81   38.60
  15 -13   9   95.88   37.93
  15  13   9  128.44   44.67
  13 -15   9  145.97   49.25
 -13 -15   9  159.48   58.71
 -15 -13   9   89.70   43.45
 -13  15   9  156.27   57.73
 -15  13   9  134.49   48.42
  13  15   9  128.76   48.63
 -13  15  10   15.82   34.90
 -15 -13  10   49.79   36.40
 -13 -15  10   70.94   38.92
  13  15  10   -0.69   34.19
  15  13  10    7.14   26.54
 -15  13  10    5.53   22.73
 -13 -15  11    0.08   25.11
 -15 -13  11  -26.45   33.48
  15  14   0   29.49   22.55
 -14  15   0  103.49   22.85
  14  15   0  136.85   36.98
 -14  15   1  308.96   26.85
  15 -14   1  283.07   19.60
  14  15   1  323.16   37.77
  14 -15   1  298.00   22.77
  15  14   1  308.83   35.77
 -15 -14   1  333.37   37.08
 -14 -15   1  324.10   35.85
 -15  14   1  303.71   25.29
 -15 -14   2   35.72   15.21
  15  14   2   15.59   11.22
  14 -15   2   20.21    9.03
 -14  15   2   37.25   12.68
 -14 -15   2   35.04   16.18
 -15  14   2   19.77   10.01
  14  15   2   15.73   10.39
  15 -14   2   26.30    8.41
 -14  15   3  166.40   33.64
  15  14   3  123.85   32.49
 -14 -15   3  189.88   30.92
 -15  14   3  120.91   26.81
  14 -15   3  132.15   23.53
  14  15   3  112.95   29.11
  15 -14   3  111.13   20.99
 -15 -14   3  169.26   29.75
 -15 -14   3  144.63   35.71
 -14 -15   3  189.98   36.48
  14  15   4  133.71   31.41
 -15 -14   4  152.82   35.64
  15 -14   4  118.42   26.23
  15  14   4  109.19   28.20
 -15  14   4  164.49   33.34
  14 -15   4  123.74   26.44
 -15 -14   4  112.29   22.15
 -14  15   4  144.65   31.77
 -14 -15   4  153.48   35.46
 -14 -15   4  113.16   21.29
 -14 -15   5   30.88   11.85
 -15 -14   5   23.98   10.12
  15 -14   5   52.38   18.30
 -14 -15   5   43.45   28.78
 -15 -14   5   53.62   27.90
  14  15   5   29.13   20.41
  14 -15   5   50.48   22.47
 -14  15   5   45.76   25.00
 -15  14   5   61.75   26.90
  15  14   5    1.50   14.12
  14  15   6   91.23   34.26
  15 -14   6   81.77   28.16
 -14  15   6  118.01   39.66
 -15 -14   6  106.88   35.93
 -14 -15   6  121.73   38.55
  14 -15   6   79.77   31.94
 -15  14   6  102.23   37.82
  15  14   6   97.38   31.80
  15 -14   7   37.60   24.46
 -14  15   7   81.69   36.51
  15  14   7   29.33   24.75
  14  15   7  100.18   35.51
 -14 -15   7   66.93   31.57
 -15  14   7   64.49   33.40
 -15 -14   7   40.79   30.31
  14 -15   7   62.06   26.49
  14 -15   8   11.79   16.14
 -15 -14   8  -29.23   18.92
 -14 -15   8  106.07   42.62
 -15  14   8   -1.36   24.39
  14  15   8   18.03   23.82
  15  14   8   54.56   37.16
 -14  15   8   48.51   36.28
  15 -14   8   37.38   24.39
  14 -15   9  118.90   42.98
 -14 -15   9  177.84   55.01
 -15 -14   9   96.54   44.20
  14  15   9  146.40   49.49
  15  14   9   68.30   40.89
 -14  15   9  104.60   48.10
 -15  14   9   84.96   42.83
 -14 -15  10   54.41   36.35
  14  15  10   32.36   32.12
 -15  14  10   11.73   26.77
  15  14  10   10.75   28.08
 -14  15  10   13.08   22.96
 -15 -14  10  -51.91   33.29
 -15 -14  11   16.76   33.33
 -14 -15  11    0.08   24.21
  15  15   0   -2.41   11.04
 -15  15   0  -37.57   13.50
  15 -15   1  217.69   18.88
 -15  15   1  209.00   22.34
 -15 -15   1  257.99   33.65
  15  15   1  253.13   34.31
 -15  15   2   23.88   11.25
 -15 -15   2   34.63   18.50
  15 -15   2   20.31    8.48
  15  15   2   35.03   12.74
  15  15   3  970.64   67.17
 -15 -15   3 1025.11   73.19
 -15  15   3 1038.28   67.43
 -15 -15   3 1064.73   68.10
  15 -15   3  972.11   56.57
 -15 -15   4   95.45   29.19
  15  15   4  105.10   27.61
 -15  15   4  151.66   34.80
  15 -15   4  106.82   23.34
 -15 -15   4   72.89   18.22
 -15 -15   5    2.20   15.11
 -15 -15   5   18.77   10.41
  15  15   5   17.33   15.67
  15 -15   5   -5.47   12.57
 -15  15   5   11.56   21.74
 -15 -15   6   64.31   29.73
  15  15   6   53.36   28.30
  15 -15   6   55.47   25.91
 -15  15   6   48.54   27.96
  15 -15   7  175.56   40.93
  15  15   7  149.75   41.42
 -15  15   7  114.24   41.31
 -15 -15   7  161.00   43.41
  15 -15   8   56.13   31.15
  15  15   8   72.25   37.85
 -15 -15   8   43.73   22.27
 -15  15   8   73.87   36.89
  15  15   9  120.35   44.68
 -15 -15   9   91.88   43.75
 -15  15   9   96.86   42.08
 -15 -15  10  -36.25   33.96
  15  15  10   40.11   36.32
 -15  15  10   14.39   29.72
 -15 -15  11   19.28   27.68
 -16   0   0 7453.47  167.20
 -16   0   0 7245.65   93.68
   0  16   0 7546.28  147.06
  16   0   1  677.93   27.69
 -16   0   1  690.45   38.69
 -16   0  -1  659.46   51.17
   0  16   1  569.03   42.24
 -16   0   1  717.47   52.92
   0 -16   1  558.93   42.71
   0  16  -1  600.15   43.07
   0 -16   2   27.63   11.09
 -16   0   2   33.53   15.49
  16   0   2   34.34    8.18
 -16   0   2   48.83   14.05
 -16   0  -2   23.21   11.23
 -16   0   3   12.57   15.99
 -16   0  -3    5.99    8.96
  16   0   3    9.08    6.08
   0  16   3   24.63   14.49
   0 -16   3   -3.52   11.16
 -16   0   4  289.58   42.05
   0  16   4  296.75   39.52
 -16   0  -4  336.86   43.10
   0 -16   4  314.92   39.94
  16   0   4  308.07   35.64
 -16   0   5    0.74   14.16
   0 -16   5   13.07   14.50
 -16   0  -5   16.08   14.24
  16   0   5   20.24   17.96
   0  16   5    0.91   15.73
 -16   0   6  384.82   58.42
  16   0   6  452.29   57.22
 -16   0  -6  336.92   51.64
   0 -16   6  436.23   57.77
   0  16   6  412.16   59.14
   0 -16   7   22.54   22.75
 -16   0   7  -20.24   22.69
 -16   0  -7   -1.48   15.18
   0  16   7   24.94   23.75
  16   0   7  -21.73   19.40
 -16   0   8   24.52   27.75
   0 -16   8   -0.23   21.67
   0  16   8   43.45   22.04
  16   0   8   37.79   24.32
 -16   0   9  118.94   46.13
   0 -16   9  193.72   54.41
   0  16   9  119.81   47.78
  16   0   9  164.24   46.58
   0  16  10   33.42   34.96
   0 -16  10   38.55   34.53
  16   0  10   27.25   23.23
 -16   0  10   81.20   39.96
   0 -16  11  -18.54   24.05
 -16   0  11    2.18   32.33
   0  16  11   59.06   44.74
 -16  -1   0   45.70   22.30
   1  16   0  196.52   40.80
  -1  16   0  176.24   36.97
 -16   1   0  103.33   29.01
 -16   1  -1  160.30   29.05
   1  16   1  150.38   26.36
 -16   1   1  140.18   20.23
 -16  -1   1  153.43   18.93
 -16   1   1  174.94   29.87
   1  16  -1  116.98   24.17
 -16  -1   1  154.53   26.70
   1 -16   1   80.10   16.99
 -16  -1  -1  167.09   30.15
  -1  16  -1   93.25   19.78
  -1  16   1  130.50   22.38
  16   1   1  110.33   12.07
  -1 -16   1  101.31   21.10
  16  -1   1  131.79   11.12
 -16   1   2  131.02   23.59
 -16  -1   2  120.84   23.70
   1 -16   2  109.41   19.57
 -16  -1   2  133.28   21.43
  -1  16   2  130.16   23.30
   1  16   2  169.00   29.24
 -16  -1  -2  113.23   22.92
  16  -1   2  126.13   13.94
  -1 -16   2  117.82   20.13
 -16   1   2  132.00   24.97
  16   1   2  125.19   15.19
 -16   1  -2  115.77   23.10
 -16  -1   3   78.36   25.82
 -16   1   3  102.04   30.14
  16   1   3   24.35   11.68
   1  16   3   24.75   14.61
 -16   1  -3   26.08   20.04
   1 -16   3   11.71   10.59
 -16  -1  -3   48.67   19.70
  16  -1   3   32.56   10.91
  -1  16   3   26.24   13.45
  -1 -16   3   19.06   16.57
 -16   1  -4  181.79   34.20
  16  -1   4  194.75   28.49
   1 -16   4  187.04   32.55
 -16   1   4  203.76   38.64
  -1  16   4  198.23   33.85
 -16  -1   4  157.78   32.31
  16   1   4  198.57   31.09
  -1 -16   4  178.02   32.15
   1  16   4  213.60   37.29
 -16  -1  -4  184.36   33.56
  16   1   5   21.55   15.33
 -16  -1  -5    9.41   16.74
 -16   1   5    4.40   14.73
   1 -16   5   29.03   18.46
 -16  -1   5   -7.69   11.80
  -1 -16   5   40.00   22.42
   1  16   5   29.06   18.84
  -1  16   5  -14.35   14.33
 -16   1  -5   12.71   15.49
  16  -1   5   -0.68    9.82
 -16  -1   6   89.63   36.69
 -16   1  -6  154.91   36.45
  -1  16   6  159.36   42.66
 -16   1   6  115.12   39.97
  -1 -16   6  226.90   45.32
   1  16   6  146.34   43.89
   1 -16   6  104.40   36.00
 -16  -1  -6  183.37   42.66
  16   1   6  134.68   38.57
  16  -1   6  157.06   38.56
 -16   1   7   34.81   25.36
  -1 -16   7    7.90   17.81
  16  -1   7   17.34   20.64
   1 -16   7   23.72   26.98
 -16  -1  -7   35.85   22.43
  -1  16   7    4.72   20.68
 -16   1  -7   22.05   16.04
   1  16   7   18.08   26.03
  16   1   7   15.54   18.87
 -16  -1   7   -9.33   15.70
   1 -16   8  -24.24   26.52
 -16   1   8   71.49   35.57
  16   1   8   11.08   19.49
 -16  -1   8    7.65   21.72
  -1 -16   8    9.64   20.05
   1  16   8   57.58   31.93
  -1  16   8   20.51   25.48
  16  -1   8   22.58   27.95
 -16   1   9  146.91   48.67
 -16  -1   9  123.53   56.34
   1 -16   9   85.65   43.57
  -1 -16   9  121.65   49.45
  -1  16   9  126.92   47.99
  16   1   9  124.82   46.67
  16  -1   9  128.58   49.56
   1  16   9  117.20   48.76
  16   1  10   16.29   28.35
 -16  -1  10   61.41   34.63
  -1 -16  10  -12.88   24.09
   1 -16  10    5.87   24.77
  16  -1  10    8.00   26.05
  -1  16  10   66.00   34.02
 -16   1  10   26.84   27.40
   1  16  10  -23.30   30.55
  -1 -16  11  -25.21   35.77
 -16  -1  11   83.30   41.10
 -16   1  11   42.88   38.04
   1  16  11   17.51   33.95
  -1  16  11   15.04   31.95
 -16  -2   0 3970.60  121.55
  -2  16   0 3936.05  104.97
 -16   2   0 3845.76   61.94
 -16  -2   0 3714.42   74.14
   2  16   0 3900.78  108.35
  -2  16  -1  560.22   40.81
   2  16   1  613.41   44.53
 -16  -2   1  625.85   48.27
   2  16  -1  642.12   45.83
  -2 -16   1  538.19   43.21
   2 -16   1  517.24   39.91
  16   2   1  588.57   30.09
 -16  -2   1  599.13   35.89
 -16   2   1  636.23   51.12
 -16  -2  -1  634.56   50.52
 -16   2  -1  497.39   46.27
 -16   2   1  604.71   37.01
  -2  16   1  608.64   43.19
 -16   2  -1  523.64   18.35
 -16  -2  -2   44.90   19.76
 -16  -2   2   64.37   18.69
 -16  -2   2   71.07   16.45
  16   2   2   64.94   13.12
  16  -2   2   55.04    8.92
  -2 -16   2   69.61   18.14
   2  16   2  113.53   28.83
  -2  16   2   75.07   20.72
 -16   2  -2   72.84   20.89
 -16   2   2   65.33   17.71
   2 -16   2   73.88   18.72
  -2 -16   3   26.56   10.78
 -16   2  -3   44.50   16.47
 -16  -2   3    8.65   10.77
   2  16   3    8.19    9.65
   2 -16   3   23.34   10.14
  16   2   3   22.75   10.34
  16  -2   3   20.87    8.16
  -2  16   3   24.30   11.19
 -16  -2  -3   15.98   11.18
 -16   2   3   32.35   12.78
 -16  -2   3   44.75   17.17
  -2 -16   4  364.59   44.38
 -16  -2   4  384.46   46.85
  -2  16   4  339.32   42.35
  16   2   4  365.10   40.09
   2  16   4  305.72   40.71
  16  -2   4  347.11   36.54
 -16   2  -4  435.94   46.77
   2 -16   4  360.75   44.98
 -16   2   4  332.22   45.96
  -2 -16   5  175.50   34.84
 -16   2   5  186.12   35.68
   2  16   5  206.29   38.31
  -2  16   5  154.93   34.22
 -16  -2   5  146.40   33.02
 -16   2  -5  168.16   32.16
   2 -16   5  196.59   37.50
  16   2   5  173.67   32.38
  16  -2   5  149.45   28.23
  16  -2   6  398.85   50.82
 -16   2  -6  399.77   51.56
   2  16   6  405.01   58.18
 -16   2   6  377.69   58.85
  16   2   6  384.48   52.55
  -2  16   6  448.49   61.75
   2 -16   6  388.11   55.10
  -2 -16   6  389.06   54.64
 -16  -2   6  412.17   61.69
 -16   2   7   43.15   30.92
 -16  -2  -7   41.42   27.25
 -16  -2   7   64.80   34.57
  -2 -16   7   -3.76   18.63
   2  16   7   -2.67   20.25
   2 -16   7    8.27   15.11
  -2  16   7   34.94   25.73
  16   2   7   -8.09   18.00
  16  -2   7   -8.46   13.85
   2  16   8   61.17   36.26
  -2 -16   8    6.34   20.21
 -16   2   8   61.06   39.19
  16   2   8   39.63   22.73
 -16  -2   8   24.10   19.64
  -2  16   8  -13.64   21.95
  16  -2   8   26.19   25.25
   2 -16   8  -11.06   21.53
   2  16   9   67.78   29.50
 -16   2   9   95.16   44.65
 -16  -2   9  130.44   44.81
  16   2   9  165.91   49.44
   2 -16   9  115.77   42.30
  -2 -16   9  139.09   51.79
  -2  16   9   72.44   37.64
  16  -2   9  140.77   48.58
  -2 -16  10   56.60   35.50
 -16   2  10   27.34   33.64
 -16  -2  10   74.37   41.27
  -2  16  10   16.88   35.27
   2  16  10   37.28   27.05
  16   2  10   32.37   31.61
   2 -16  10   59.06   40.44
   2  16  11   45.29   36.17
  -2 -16  11   -4.71   25.91
 -16  -2  11   -7.02   24.41
 -16   2  11   74.74   43.54
  -2  16  11   49.16   43.81
 -16   3   0   52.36   25.28
 -16  -3   0   47.49   20.00
  16   3   1  149.81   16.73
 -16  -3  -1   93.40   19.06
  -3 -16   1  200.38   27.27
   3 -16   1  127.11   20.75
 -16  -3   1  168.26   21.72
  -3  16   1  155.82   23.96
 -16   3   1  171.67   22.17
 -16   3  -1  176.36   30.39
 -16  -3   1  176.32   27.74
   3  16   1   83.67   14.99
   3  16  -1  175.25   24.88
 -16   3   1  177.48   30.67
  -3  16  -1  123.05   22.06
 -16   3   2  324.75   36.93
  -3  16   2  322.82   34.17
  16  -3   2  303.95   18.69
   3  16   2  375.24   45.25
 -16  -3   2  348.98   34.84
 -16  -3   2  335.14   38.58
 -16  -3  -2  247.76   36.22
 -16   3  -2  309.48   39.87
  -3 -16   2  289.83   34.03
  16   3   2  292.93   25.66
   3 -16   2  294.95   33.20
 -16   3  -3   50.29   21.14
   3 -16   3   21.97   12.34
  -3  16   3   25.70   11.09
  -3 -16   3   27.15   13.97
 -16   3   3   44.19   21.94
 -16  -3   3   83.47   24.49
   3  16   3   38.44   16.71
  16   3   3   26.58   11.18
  16  -3   3   26.84   10.54
 -16  -3   3   54.55   19.05
 -16   3  -4  163.48   30.55
 -16  -3   4  225.24   37.62
  -3  16   4  177.08   32.13
  16  -3   4  186.65   27.66
 -16   3   4  223.68   38.67
   3 -16   4  240.68   38.00
  16   3   4  206.78   31.20
  -3 -16   4  256.03   39.37
   3  16   4  206.05   35.62
 -16   3  -5   36.32   17.61
 -16   3   5   29.26   23.40
 -16  -3   5   39.83   25.35
  -3  16   5   70.60   32.37
   3  16   5   47.86   23.90
  -3 -16   5   67.71   26.92
   3 -16   5   22.37   20.28
  16   3   5   33.11   24.12
  16  -3   5   38.93   21.30
 -16   3  -6  106.78   26.40
 -16  -3   6  148.92   40.00
 -16   3   6  109.01   37.27
  16   3   6  137.49   35.68
  -3  16   6  113.01   38.32
   3  16   6  140.85   36.73
   3 -16   6  121.38   39.02
  -3 -16   6  122.44   32.90
  16  -3   6   91.35   28.30
  16   3   7   61.64   27.68
 -16  -3   7  104.49   40.52
  -3 -16   7   35.76   31.11
  -3  16   7   44.86   22.71
   3  16   7   71.43   35.33
  16  -3   7   81.76   30.72
 -16   3   7   97.32   44.22
   3 -16   7   96.10   42.17
 -16  -3   8   37.47   30.65
   3 -16   8   42.78   32.01
 -16   3   8  100.48   43.60
  -3  16   8   74.17   42.18
  16   3   8   37.01   28.23
   3  16   8   23.15   27.33
  16  -3   8    4.52   20.68
  -3 -16   8   88.39   42.06
  -3 -16   9  112.06   43.17
  -3  16   9   31.66   30.14
 -16  -3   9   81.52   40.81
   3 -16   9   82.73   42.47
  16   3   9    9.89   31.92
   3  16   9   53.21   33.66
  16  -3   9   76.22   37.74
 -16   3   9   51.02   39.60
 -16   3  10   50.20   34.47
   3  16  10   28.83   30.14
  16   3  10   -7.74   26.34
 -16  -3  10   34.29   34.23
   3 -16  10   25.89   29.14
  -3  16  10   45.85   35.48
  -3 -16  10   81.28   40.60
   3  16  11   -4.99   24.60
 -16   3  11   19.17   33.96
 -16  -3  11   22.07   29.72
  -3  16  11   -3.32   28.63
  -3 -16  11   50.40   39.79
  -4  16   0 1618.04   65.84
   4  16   0 1593.76   71.86
 -16   4   0 1563.59   81.38
 -16  -4   0 1573.04   76.93
 -16  -4   0 1577.77   55.82
 -16   4   1  448.66   32.34
  -4 -16   1  513.84   41.47
 -16   4   1  477.78   49.75
 -16  -4   1  470.31   43.64
 -16   4  -1  484.60   46.23
  16   4   1  493.53   31.46
 -16  -4   1  493.85   35.52
   4 -16   1  460.64   35.40
  -4  16   1  497.24   39.11
  -4  16  -1  442.63   37.39
  -4 -16   2  179.07   28.52
  -4  16   2  178.48   29.24
  16  -4   2  145.30   12.70
 -16  -4   2  149.65   27.66
   4 -16   2  180.16   27.80
 -16  -4   2  188.68   25.98
  16   4   2  154.23   22.29
 -16   4  -2  156.91   29.75
 -16   4   2  184.78   29.64
  -4 -16   3   22.00    7.77
 -16   4   3   -0.66   13.43
   4  16   3   36.43   15.48
 -16  -4   3   32.82   13.75
  16  -4   3    8.66    5.53
  -4  16   3   14.51   12.35
 -16   4  -3    6.51    7.09
  16   4   3   11.05    6.78
   4 -16   3   11.88    8.14
 -16  -4   3   20.85    9.85
 -16   4  -4  281.07   37.98
   4 -16   4  274.90   39.66
  -4  16   4  243.35   39.72
  16  -4   4  239.09   31.65
 -16   4   4  258.87   40.30
  -4 -16   4  264.88   19.74
   4  16   4  225.98   36.13
  16   4   4  238.95   34.40
 -16  -4   4  251.09   38.44
  -4 -16   4  286.88   40.95
   4  16   5  362.09   49.12
   4 -16   5  439.63   53.29
  -4  16   5  421.20   54.42
  -4 -16   5  375.33   51.07
  16   4   5  431.86   50.17
 -16   4   5  394.27   54.59
 -16  -4   5  356.41   52.37
  16  -4   5  392.13   45.93
 -16   4  -5  388.37   45.87
   4 -16   6  223.48   46.59
 -16  -4   6  202.86   42.47
  -4 -16   6  173.79   39.35
   4  16   6  218.55   41.79
  16  -4   6  171.39   35.51
 -16   4   6  166.36   43.76
  16   4   6  242.80   45.77
  -4  16   6  134.51   37.42
 -16   4  -6  177.14   33.05
 -16   4   7   66.89   37.46
  -4 -16   7   64.97   30.89
  16   4   7   40.32   29.60
  -4  16   7   71.77   31.60
   4  16   7  111.46   45.92
 -16  -4   7   60.79   34.57
  16  -4   7   33.76   25.16
   4 -16   7   77.67   37.64
 -16   4   8   60.41   35.48
  16   4   8   59.62   35.99
   4  16   8   38.40   27.15
 -16  -4   8   41.15   32.42
  -4 -16   8    9.29   20.05
  -4  16   8   45.74   35.44
   4 -16   8   29.10   30.86
  16  -4   8   21.14   22.57
 -16   4   9   33.34   30.76
  -4  16   9    2.75   20.69
 -16  -4   9   53.32   37.91
  -4 -16   9   55.42   38.11
   4 -16   9   64.80   36.92
   4  16   9   34.90   30.40
  16   4   9   71.02   33.49
  16  -4   9   63.83   30.56
   4  16  10  121.49   50.93
 -16   4  10   25.83   27.07
   4 -16  10  108.70   46.05
  -4 -16  10   41.94   34.35
  16   4  10   17.46   27.62
 -16  -4  10   -0.14   26.17
  -4  16  10   61.31   40.24
 -16   4  11   46.58   32.98
   4  16  11   13.89   26.32
  -4 -16  11   66.60   42.84
  -4  16  11    0.17   29.58
 -16  -4  11   83.24   42.02
 -16   5   0   -8.14   15.04
   5  16   0  -33.75   14.29
  -5  16   0   42.41   15.26
 -16  -5   0    9.29    6.53
 -16  -5   0   14.84   12.85
 -16  -5   1  256.46   27.08
   5 -16   1  236.54   27.93
  -5 -16   1  325.96   37.23
  16   5   1  257.38   24.63
 -16   5  -1  233.63   34.60
  -5  16   1  270.49   30.79
 -16  -5   1  255.31   33.26
 -16   5   1  249.59   23.40
   5  16   2  536.01   50.85
 -16  -5   2  507.25   43.09
   5 -16   2  496.21   41.54
 -16   5  -2  451.66   48.55
  16  -5   2  380.92   19.52
  -5 -16   2  413.76   42.72
  16   5   2  397.21   33.93
  -5  16   2  394.04   40.47
 -16  -5   2  468.40   46.85
 -16   5   2  506.16   44.49
 -16   5   3   39.25   22.25
   5  16   3   32.46   14.19
[truncated: 1,385,708 more chars]
